# Supplementary material for: The Recent Recombinant Evolution of a Major Crop Pathogen, Potato virus Y
Source: PLoS One. 2012 Nov 30;7(11):e50631. doi: 10.1371/journal.pone.0050631 (PMC3511492; doi:10.1371/journal.pone.0050631)
Supplement: Dataset S1 — Standard alignment of sequences used in this study. (NEX) [file pone.0050631.s004.nex]

#NEXUS

BEGIN data;
	DIMENSIONS NTAX=47 NCHAR=10685;
	FORMAT DATATYPE = DNA INTERLEAVE GAP = - MISSING = ?;
	MATRIX
	
[	             00000000000000000000000000000000000000000000000000000000000000000000000000000000000000000000000000000000000000000000000000000000000000000000000000000000000000000000000000000000000000000000000000000000000000000000000000000000000000000000000000000000000000000000000000000000000000000000000000000000000000000000000000000000000000000000000000000000000000000000000000000000000000000000000000000000000000000000000000000000000000000000000000000000000000000000000000000000000000000000000000000000000000000000000000000000000000000000000000000000000000000000000000000000000000000000000000000000000000000000000000000000000000000000000000000000000000000000000000000000000000000000000000000000000000000000000000000000000000000000000000000000000000000000000000000000000000000000000000000000000000000000000000000000000000000000000000000000000000000000000000000000000000000000000000000000000000000000000000000000000000000000000000000000000000000000000000000000000000000000000000000000000000000000000000000000000000000000000000000000000000000000000000000000000000000000000000000000000000000000000000000000000000000000000000000000000000000000000000000000000000000000000000000000000000000000000000000000000000000000000000000000000000000000000000000000000000000000000000000000000000000000000000000000000000000000000000000000000000000000000000000000000000000000000000000000000000000000000000000000000000000000000000000000000000000000000000000000000000000000000000000000000000000000000000000000000000000000000000000000000000000000000000000000000000000000000000000000000000000000000000000000000000000000000000000000000000000000000000000000000000000000000000000000000000000000000000000000000000000000000000000000000000000000000000000000000000000000000000000000000000000000000000000000000000000000000000000000000000000000000000000000000000000000000000000000000000000000000000000000000000000000000000000000000000000000000000000000000000000000000000000000000000000000000000000000000000000000000000000000000000000000000000000000000000000000000000000000000000000000000000000000000000000000000000000000000000000000000000000000000000000000000000000000000000000000000000000000000000000000000000000000000000000000000000000000000000000000000000000000000000000000000000000000000000000000000000000000000000000000000000000000000000000000000000000000000000000000000000000000000000000000000000000000000000000000000000000000000000000000000000000000000000000000000000000000000000000000000000000000000000000000000000000000000000000000000000000000000000000000000000000000000000000000000000000000000000000000000000000000000000000000000000000000000000000000000000000000000000000000000000000000000000000000000000000000000000000000000000000000000000000000000000000000000000000000000000000000000000000000000000000000000000000000000000000000000000000000000000000000000000000000000000000000000000000000000000000000000000000000000000000000000000000000000000000000000000000000000000000000000000000000000000000000000000000000000000000000000000000000000000000000000000000000000000000000000000000000000000000000000000000000000000000000000000000000000000000000000000000000000000000000000000000000000000000000000000000000000000000000000000000000000000000000000000000000000000000000000000000000000000000000000000000000000000000000000000000000000000000000000000000000000000000000000000000000000000000000000000000000000000000000000000000000000000000000000000000000000000000000000000000000000000000000000000000000000000000000000000000000000000000000000000000000000000000000000000000000000000000000000000000000000000000000000000000000000000000000000000000000000000000000000000000000000000000000000000000000000000000000000000000000000000000000000000000000000000000000000000000000000000000000000000000000000000000000000000000000000000000000000000000000000000000000000000000000000000000000000000000000000000000000000000000000000000000000000000000000000000000000000000000000000000000000000000000000000000000000000000000000000000000000000000000000000000000000000000000000000000000000000000000000000000000000000000000000000000000000000000000000000000000000000000000000000000000000000000000000000000000000000000000000000000000000000000000000000000000000000000000000000000000000000000000000000000000000000000000000000000000000000000000000000000000000000000000000000000000000000000000000000000000000000000000000000000000000000000000000000000000000000000000000000000000000000000000000000000000000000000000000000000000000000000000000000000000000000000000000000000000000000000000000000000000000000000000000000000000000000000000000000000000000000000000000000000000000000000000000000000000000000000000000000000000000000000000000000000000000000000000000000000000000000000000000000000000000000000000000000000000000000000000000000000000000000000000000000000000000000000000000000000000000000000000000000000000000000000000000000000000000000000000000000000000000000000000000000000000000000000000000000000000000000000000000000000000000000000000000000000000000000000000000000000000000000000000000000000000000000000000000000000000000000000000000000000000000000000000000000000000000000000000000000000000000000000000000000000000000000000000000000000000000000000000000000000000000000000000000000000000000000000000000000000000000000000000000000000000000000000000000000000000000000000000000000000000000000000000000000000000000000000000000000000000000000000000000000000000000000000000000000000000000000000000000000000000000000000000000000000000000000000000000000000000000000000000000000000000000000000000000000000000000000000000000000000000000000000000000000000000000000000000000000000000000000000000000000000000000000000000000000000000000000000000000000000000000000000000000000000000000000000000000000000000000000000000000000000000000000000000000000000000000000000000000000000000000000000000000000000000000000000000000000000000000000000000000000000000000000000000000000000000000000000000000000000000000000000000000000000000000000000000000000000000000000000000000000000000000000000000000000000000000000000000000000000000000000000000000000000000000000000000000000000000000000000000000000000000000000000000000000000000000000000000000000000000000000000000000000000000000000000000000000000000000000000000000000000000000000000000000000000000000000000000000000000000000000000000000000000000000000000000000000000000000000000000000000000000000000000000000000000000000000000000000000000000000000000000000000000000000000000000000000000000000000000000000000000000000000000000000000000000000000000000000000000000000000000000000000000000000000000000000000000000000000000000000000000000000000000000000000000000000000000000000000000000000000000000000000000000000000000000000000000000000000000000000000000000000000000000000000000000000000000000000000000000000000000000000000000000000000000000000000000000000000000000000000000000000000000000000000000000000000000000000000000000000000000000000000000000000000000000000000000000000000000000000000000000000000000000000000000000000000000000000000000000000000000000000000000000000000000000000000000000000000000000000000000000000000000000000000000000000000000000000000000000000000000000000000000000000000000000000000000000000000000000000000000000000000000000000000000000000000000000000000000000000000000000000000000000000000000000000000000000000000000000000000000000000000000000000000000000000000000000000000000000000000000000000000000000000000000000000000000000000000000000000000000000000000000000000000000000000000000000000000000000000000000000000000000000000000000000000000000000000000000000000000000000000000000000000000000000000000000000000000000000000000000000000000000000000000000000000000000000000000000000000000000000000000000000000000000000000000000000000000000000000000000000000000000000000000000000000000000000000000000000000000000000000000000000000000000000000000000000000000000000000000000000000000000000000000000000000000000000000000000000000000000000000000000000000000000000000000000000000000000000000000000000000000000000000000000000000000000000000000000000000000000000000000000000000000000000000000000000000000000000000000000000000000000000000000000000000000000000000000000000000000000000000000000000000000000000000000000000000000000000000000000000000000000000000000000000000000000000000000000000000000000000000000000000000000000000000000000000000000000000000000000000000000000000000000000000000000000000000000000000000000000000000000000000000000000000000000000000000000000000000000000000000000000000000000000000000000000000000000000000000000000000000000000000000000000000000000000000000000000000000000000000000000000000000000000000000000000000000000000000000000000000000000000000000000000000000000000000000000000000000000000000000000000000000000000000000000000000000000000000000000000000000000000000000000000000000000000000000000000000000000000000000000000000000000000000000000000000000000000000000000000000000000000000000000000000000000000000000000000000000000000000000000000000000000000000000000000000000000000000000000000000000000000000000000000000000000000000000000000000000000000000000000000000000000000000000000000000000000000000000000000000000000000000000000000000000000000000000000000000000000000000000000000000000000000000000000000000000000000000000000000000000000000000000000000000000000000000000000000000000000000000000000000000000000000000000000000000000000000000000000000000000000000000000000000000000000000000000000000000000000000000000000000000000000000000000000000000000000000000000000000000000000000000000000000000000000000000000000000000000000000000000000000000000000000000000000000000000000000000000000000000000000000000000000000000000000000000000000000000000000000000000000000000000000000000000000000000000000000000000000000000000000000000000000000000000000000000000000000000000000000000000000000000000000000000000000000000000000000000000000000000000000000000000000000000000000000000000000000000000000000000000000000000000000000000000000000000000000000000000000000000000000000000000000000000000000000000000000000000000000000011111111111111111111111111111111111111111111111111111111111111111111111111111111111111111111111111111111111111111111111111111111111111111111111111111111111111111111111111111111111111111111111111111111111111111111111111111111111111111111111111111111111111111111111111111111111111111111111111111111111111111111111111111111111111111111111111111111111111111111111111111111111111111111111111111111111111111111111111111111111111111111111111111111111111111111111111111111111111111111111111111111111111111111111111111111111111111111111111111111111111111111111111111111111111111111111111111111111111111111111111111111111111111111111111111111111111111111111111111111111111111111111111111111111111 ]
[                00000000000000000000000000000000000000000000000000000000000000000000000000000000000000000000000000000000000000000000000000000000000000000000000000000000000000000000000000000000000000000000000000000000000000000000000000000000000000000000000000000000000000000000000000000000000000000000000000000000000000000000000000000000000000000000000000000000000000000000000000000000000000000000000000000000000000000000000000000000000000000000000000000000000000000000000000000000000000000000000000000000000000000000000000000000000000000000000000000000000000000000000000000000000000000000000000000000000000000000000000000000000000000000000000000000000000000000000000000000000000000000000000000000000000000000000000000000000000000000000000000000000000000000000000000000000000000000000000000000000000000000000000000000000000000000000000000000000000000000000000000000000000000000000000000000000000000000000000000000000000000000000000000000000000000000000000000000000000000000000000000000000000000000000000000000000000011111111111111111111111111111111111111111111111111111111111111111111111111111111111111111111111111111111111111111111111111111111111111111111111111111111111111111111111111111111111111111111111111111111111111111111111111111111111111111111111111111111111111111111111111111111111111111111111111111111111111111111111111111111111111111111111111111111111111111111111111111111111111111111111111111111111111111111111111111111111111111111111111111111111111111111111111111111111111111111111111111111111111111111111111111111111111111111111111111111111111111111111111111111111111111111111111111111111111111111111111111111111111111111111111111111111111111111111111111111111111111111111111111111111111111111111111111111111111111111111111111111111111111111111111111111111111111111111111111111111111111111111111111111111111111111111111111111111111111111111111111111111111111111111111111111111111111111111111111111111111111111111111111111111111111111111111111111111111111111111111111111111111111111111111111111111111112222222222222222222222222222222222222222222222222222222222222222222222222222222222222222222222222222222222222222222222222222222222222222222222222222222222222222222222222222222222222222222222222222222222222222222222222222222222222222222222222222222222222222222222222222222222222222222222222222222222222222222222222222222222222222222222222222222222222222222222222222222222222222222222222222222222222222222222222222222222222222222222222222222222222222222222222222222222222222222222222222222222222222222222222222222222222222222222222222222222222222222222222222222222222222222222222222222222222222222222222222222222222222222222222222222222222222222222222222222222222222222222222222222222222222222222222222222222222222222222222222222222222222222222222222222222222222222222222222222222222222222222222222222222222222222222222222222222222222222222222222222222222222222222222222222222222222222222222222222222222222222222222222222222222222222222222222222222222222222222222222222222222222222222222222222222222222333333333333333333333333333333333333333333333333333333333333333333333333333333333333333333333333333333333333333333333333333333333333333333333333333333333333333333333333333333333333333333333333333333333333333333333333333333333333333333333333333333333333333333333333333333333333333333333333333333333333333333333333333333333333333333333333333333333333333333333333333333333333333333333333333333333333333333333333333333333333333333333333333333333333333333333333333333333333333333333333333333333333333333333333333333333333333333333333333333333333333333333333333333333333333333333333333333333333333333333333333333333333333333333333333333333333333333333333333333333333333333333333333333333333333333333333333333333333333333333333333333333333333333333333333333333333333333333333333333333333333333333333333333333333333333333333333333333333333333333333333333333333333333333333333333333333333333333333333333333333333333333333333333333333333333333333333333333333333333333333333333333333333333333333333333333333333344444444444444444444444444444444444444444444444444444444444444444444444444444444444444444444444444444444444444444444444444444444444444444444444444444444444444444444444444444444444444444444444444444444444444444444444444444444444444444444444444444444444444444444444444444444444444444444444444444444444444444444444444444444444444444444444444444444444444444444444444444444444444444444444444444444444444444444444444444444444444444444444444444444444444444444444444444444444444444444444444444444444444444444444444444444444444444444444444444444444444444444444444444444444444444444444444444444444444444444444444444444444444444444444444444444444444444444444444444444444444444444444444444444444444444444444444444444444444444444444444444444444444444444444444444444444444444444444444444444444444444444444444444444444444444444444444444444444444444444444444444444444444444444444444444444444444444444444444444444444444444444444444444444444444444444444444444444444444444444444444444444444444444444444444444444444444445555555555555555555555555555555555555555555555555555555555555555555555555555555555555555555555555555555555555555555555555555555555555555555555555555555555555555555555555555555555555555555555555555555555555555555555555555555555555555555555555555555555555555555555555555555555555555555555555555555555555555555555555555555555555555555555555555555555555555555555555555555555555555555555555555555555555555555555555555555555555555555555555555555555555555555555555555555555555555555555555555555555555555555555555555555555555555555555555555555555555555555555555555555555555555555555555555555555555555555555555555555555555555555555555555555555555555555555555555555555555555555555555555555555555555555555555555555555555555555555555555555555555555555555555555555555555555555555555555555555555555555555555555555555555555555555555555555555555555555555555555555555555555555555555555555555555555555555555555555555555555555555555555555555555555555555555555555555555555555555555555555555555555555555555555555555555555666666666666666666666666666666666666666666666666666666666666666666666666666666666666666666666666666666666666666666666666666666666666666666666666666666666666666666666666666666666666666666666666666666666666666666666666666666666666666666666666666666666666666666666666666666666666666666666666666666666666666666666666666666666666666666666666666666666666666666666666666666666666666666666666666666666666666666666666666666666666666666666666666666666666666666666666666666666666666666666666666666666666666666666666666666666666666666666666666666666666666666666666666666666666666666666666666666666666666666666666666666666666666666666666666666666666666666666666666666666666666666666666666666666666666666666666666666666666666666666666666666666666666666666666666666666666666666666666666666666666666666666666666666666666666666666666666666666666666666666666666666666666666666666666666666666666666666666666666666666666666666666666666666666666666666666666666666666666666666666666666666666666666666666666666666666666666677777777777777777777777777777777777777777777777777777777777777777777777777777777777777777777777777777777777777777777777777777777777777777777777777777777777777777777777777777777777777777777777777777777777777777777777777777777777777777777777777777777777777777777777777777777777777777777777777777777777777777777777777777777777777777777777777777777777777777777777777777777777777777777777777777777777777777777777777777777777777777777777777777777777777777777777777777777777777777777777777777777777777777777777777777777777777777777777777777777777777777777777777777777777777777777777777777777777777777777777777777777777777777777777777777777777777777777777777777777777777777777777777777777777777777777777777777777777777777777777777777777777777777777777777777777777777777777777777777777777777777777777777777777777777777777777777777777777777777777777777777777777777777777777777777777777777777777777777777777777777777777777777777777777777777777777777777777777777777777777777777777777777777777777777777777777777778888888888888888888888888888888888888888888888888888888888888888888888888888888888888888888888888888888888888888888888888888888888888888888888888888888888888888888888888888888888888888888888888888888888888888888888888888888888888888888888888888888888888888888888888888888888888888888888888888888888888888888888888888888888888888888888888888888888888888888888888888888888888888888888888888888888888888888888888888888888888888888888888888888888888888888888888888888888888888888888888888888888888888888888888888888888888888888888888888888888888888888888888888888888888888888888888888888888888888888888888888888888888888888888888888888888888888888888888888888888888888888888888888888888888888888888888888888888888888888888888888888888888888888888888888888888888888888888888888888888888888888888888888888888888888888888888888888888888888888888888888888888888888888888888888888888888888888888888888888888888888888888888888888888888888888888888888888888888888888888888888888888888888888888888888888888888888999999999999999999999999999999999999999999999999999999999999999999999999999999999999999999999999999999999999999999999999999999999999999999999999999999999999999999999999999999999999999999999999999999999999999999999999999999999999999999999999999999999999999999999999999999999999999999999999999999999999999999999999999999999999999999999999999999999999999999999999999999999999999999999999999999999999999999999999999999999999999999999999999999999999999999999999999999999999999999999999999999999999999999999999999999999999999999999999999999999999999999999999999999999999999999999999999999999999999999999999999999999999999999999999999999999999999999999999999999999999999999999999999999999999999999999999999999999999999999999999999999999999999999999999999999999999999999999999999999999999999999999999999999999999999999999999999999999999999999999999999999999999999999999999999999999999999999999999999999999999999999999999999999999999999999999999999999999999999999999999999999999999999999999999999999999999999900000000000000000000000000000000000000000000000000000000000000000000000000000000000000000000000000000000000000000000000000000000000000000000000000000000000000000000000000000000000000000000000000000000000000000000000000000000000000000000000000000000000000000000000000000000000000000000000000000000000000000000000000000000000000000000000000000000000000000000000000000000000000000000000000000000000000000000000000000000000000000000000000000000000000000000000000000000000000000000000000000000000000000000000000000000000000000000000000000000000000000000000000000000000000000000000000000000000000000000000000000000000000000000000000000000000000000000000000000000000000000000000000000000000000 ]
[                00000000000000000000000000000000000000000000000000000000000000000000000000000000000000000000000000011111111111111111111111111111111111111111111111111111111111111111111111111111111111111111111111111112222222222222222222222222222222222222222222222222222222222222222222222222222222222222222222222222222333333333333333333333333333333333333333333333333333333333333333333333333333333333333333333333333333344444444444444444444444444444444444444444444444444444444444444444444444444444444444444444444444444445555555555555555555555555555555555555555555555555555555555555555555555555555555555555555555555555555666666666666666666666666666666666666666666666666666666666666666666666666666666666666666666666666666677777777777777777777777777777777777777777777777777777777777777777777777777777777777777777777777777778888888888888888888888888888888888888888888888888888888888888888888888888888888888888888888888888888999999999999999999999999999999999999999999999999999999999999999999999999999999999999999999999999999900000000000000000000000000000000000000000000000000000000000000000000000000000000000000000000000000001111111111111111111111111111111111111111111111111111111111111111111111111111111111111111111111111111222222222222222222222222222222222222222222222222222222222222222222222222222222222222222222222222222233333333333333333333333333333333333333333333333333333333333333333333333333333333333333333333333333334444444444444444444444444444444444444444444444444444444444444444444444444444444444444444444444444444555555555555555555555555555555555555555555555555555555555555555555555555555555555555555555555555555566666666666666666666666666666666666666666666666666666666666666666666666666666666666666666666666666667777777777777777777777777777777777777777777777777777777777777777777777777777777777777777777777777777888888888888888888888888888888888888888888888888888888888888888888888888888888888888888888888888888899999999999999999999999999999999999999999999999999999999999999999999999999999999999999999999999999990000000000000000000000000000000000000000000000000000000000000000000000000000000000000000000000000000111111111111111111111111111111111111111111111111111111111111111111111111111111111111111111111111111122222222222222222222222222222222222222222222222222222222222222222222222222222222222222222222222222223333333333333333333333333333333333333333333333333333333333333333333333333333333333333333333333333333444444444444444444444444444444444444444444444444444444444444444444444444444444444444444444444444444455555555555555555555555555555555555555555555555555555555555555555555555555555555555555555555555555556666666666666666666666666666666666666666666666666666666666666666666666666666666666666666666666666666777777777777777777777777777777777777777777777777777777777777777777777777777777777777777777777777777788888888888888888888888888888888888888888888888888888888888888888888888888888888888888888888888888889999999999999999999999999999999999999999999999999999999999999999999999999999999999999999999999999999000000000000000000000000000000000000000000000000000000000000000000000000000000000000000000000000000011111111111111111111111111111111111111111111111111111111111111111111111111111111111111111111111111112222222222222222222222222222222222222222222222222222222222222222222222222222222222222222222222222222333333333333333333333333333333333333333333333333333333333333333333333333333333333333333333333333333344444444444444444444444444444444444444444444444444444444444444444444444444444444444444444444444444445555555555555555555555555555555555555555555555555555555555555555555555555555555555555555555555555555666666666666666666666666666666666666666666666666666666666666666666666666666666666666666666666666666677777777777777777777777777777777777777777777777777777777777777777777777777777777777777777777777777778888888888888888888888888888888888888888888888888888888888888888888888888888888888888888888888888888999999999999999999999999999999999999999999999999999999999999999999999999999999999999999999999999999900000000000000000000000000000000000000000000000000000000000000000000000000000000000000000000000000001111111111111111111111111111111111111111111111111111111111111111111111111111111111111111111111111111222222222222222222222222222222222222222222222222222222222222222222222222222222222222222222222222222233333333333333333333333333333333333333333333333333333333333333333333333333333333333333333333333333334444444444444444444444444444444444444444444444444444444444444444444444444444444444444444444444444444555555555555555555555555555555555555555555555555555555555555555555555555555555555555555555555555555566666666666666666666666666666666666666666666666666666666666666666666666666666666666666666666666666667777777777777777777777777777777777777777777777777777777777777777777777777777777777777777777777777777888888888888888888888888888888888888888888888888888888888888888888888888888888888888888888888888888899999999999999999999999999999999999999999999999999999999999999999999999999999999999999999999999999990000000000000000000000000000000000000000000000000000000000000000000000000000000000000000000000000000111111111111111111111111111111111111111111111111111111111111111111111111111111111111111111111111111122222222222222222222222222222222222222222222222222222222222222222222222222222222222222222222222222223333333333333333333333333333333333333333333333333333333333333333333333333333333333333333333333333333444444444444444444444444444444444444444444444444444444444444444444444444444444444444444444444444444455555555555555555555555555555555555555555555555555555555555555555555555555555555555555555555555555556666666666666666666666666666666666666666666666666666666666666666666666666666666666666666666666666666777777777777777777777777777777777777777777777777777777777777777777777777777777777777777777777777777788888888888888888888888888888888888888888888888888888888888888888888888888888888888888888888888888889999999999999999999999999999999999999999999999999999999999999999999999999999999999999999999999999999000000000000000000000000000000000000000000000000000000000000000000000000000000000000000000000000000011111111111111111111111111111111111111111111111111111111111111111111111111111111111111111111111111112222222222222222222222222222222222222222222222222222222222222222222222222222222222222222222222222222333333333333333333333333333333333333333333333333333333333333333333333333333333333333333333333333333344444444444444444444444444444444444444444444444444444444444444444444444444444444444444444444444444445555555555555555555555555555555555555555555555555555555555555555555555555555555555555555555555555555666666666666666666666666666666666666666666666666666666666666666666666666666666666666666666666666666677777777777777777777777777777777777777777777777777777777777777777777777777777777777777777777777777778888888888888888888888888888888888888888888888888888888888888888888888888888888888888888888888888888999999999999999999999999999999999999999999999999999999999999999999999999999999999999999999999999999900000000000000000000000000000000000000000000000000000000000000000000000000000000000000000000000000001111111111111111111111111111111111111111111111111111111111111111111111111111111111111111111111111111222222222222222222222222222222222222222222222222222222222222222222222222222222222222222222222222222233333333333333333333333333333333333333333333333333333333333333333333333333333333333333333333333333334444444444444444444444444444444444444444444444444444444444444444444444444444444444444444444444444444555555555555555555555555555555555555555555555555555555555555555555555555555555555555555555555555555566666666666666666666666666666666666666666666666666666666666666666666666666666666666666666666666666667777777777777777777777777777777777777777777777777777777777777777777777777777777777777777777777777777888888888888888888888888888888888888888888888888888888888888888888888888888888888888888888888888888899999999999999999999999999999999999999999999999999999999999999999999999999999999999999999999999999990000000000000000000000000000000000000000000000000000000000000000000000000000000000000000000000000000111111111111111111111111111111111111111111111111111111111111111111111111111111111111111111111111111122222222222222222222222222222222222222222222222222222222222222222222222222222222222222222222222222223333333333333333333333333333333333333333333333333333333333333333333333333333333333333333333333333333444444444444444444444444444444444444444444444444444444444444444444444444444444444444444444444444444455555555555555555555555555555555555555555555555555555555555555555555555555555555555555555555555555556666666666666666666666666666666666666666666666666666666666666666666666666666666666666666666666666666777777777777777777777777777777777777777777777777777777777777777777777777777777777777777777777777777788888888888888888888888888888888888888888888888888888888888888888888888888888888888888888888888888889999999999999999999999999999999999999999999999999999999999999999999999999999999999999999999999999999000000000000000000000000000000000000000000000000000000000000000000000000000000000000000000000000000011111111111111111111111111111111111111111111111111111111111111111111111111111111111111111111111111112222222222222222222222222222222222222222222222222222222222222222222222222222222222222222222222222222333333333333333333333333333333333333333333333333333333333333333333333333333333333333333333333333333344444444444444444444444444444444444444444444444444444444444444444444444444444444444444444444444444445555555555555555555555555555555555555555555555555555555555555555555555555555555555555555555555555555666666666666666666666666666666666666666666666666666666666666666666666666666666666666666666666666666677777777777777777777777777777777777777777777777777777777777777777777777777777777777777777777777777778888888888888888888888888888888888888888888888888888888888888888888888888888888888888888888888888888999999999999999999999999999999999999999999999999999999999999999999999999999999999999999999999999999900000000000000000000000000000000000000000000000000000000000000000000000000000000000000000000000000001111111111111111111111111111111111111111111111111111111111111111111111111111111111111111111111111111222222222222222222222222222222222222222222222222222222222222222222222222222222222222222222222222222233333333333333333333333333333333333333333333333333333333333333333333333333333333333333333333333333334444444444444444444444444444444444444444444444444444444444444444444444444444444444444444444444444444555555555555555555555555555555555555555555555555555555555555555555555555555555555555555555555555555566666666666666666666666666666666666666666666666666666666666666666666666666666666666666 ]
[                00000000011111111112222222222333333333344444444445555555555666666666677777777778888888888999999999900000000001111111111222222222233333333334444444444555555555566666666667777777777888888888899999999990000000000111111111122222222223333333333444444444455555555556666666666777777777788888888889999999999000000000011111111112222222222333333333344444444445555555555666666666677777777778888888888999999999900000000001111111111222222222233333333334444444444555555555566666666667777777777888888888899999999990000000000111111111122222222223333333333444444444455555555556666666666777777777788888888889999999999000000000011111111112222222222333333333344444444445555555555666666666677777777778888888888999999999900000000001111111111222222222233333333334444444444555555555566666666667777777777888888888899999999990000000000111111111122222222223333333333444444444455555555556666666666777777777788888888889999999999000000000011111111112222222222333333333344444444445555555555666666666677777777778888888888999999999900000000001111111111222222222233333333334444444444555555555566666666667777777777888888888899999999990000000000111111111122222222223333333333444444444455555555556666666666777777777788888888889999999999000000000011111111112222222222333333333344444444445555555555666666666677777777778888888888999999999900000000001111111111222222222233333333334444444444555555555566666666667777777777888888888899999999990000000000111111111122222222223333333333444444444455555555556666666666777777777788888888889999999999000000000011111111112222222222333333333344444444445555555555666666666677777777778888888888999999999900000000001111111111222222222233333333334444444444555555555566666666667777777777888888888899999999990000000000111111111122222222223333333333444444444455555555556666666666777777777788888888889999999999000000000011111111112222222222333333333344444444445555555555666666666677777777778888888888999999999900000000001111111111222222222233333333334444444444555555555566666666667777777777888888888899999999990000000000111111111122222222223333333333444444444455555555556666666666777777777788888888889999999999000000000011111111112222222222333333333344444444445555555555666666666677777777778888888888999999999900000000001111111111222222222233333333334444444444555555555566666666667777777777888888888899999999990000000000111111111122222222223333333333444444444455555555556666666666777777777788888888889999999999000000000011111111112222222222333333333344444444445555555555666666666677777777778888888888999999999900000000001111111111222222222233333333334444444444555555555566666666667777777777888888888899999999990000000000111111111122222222223333333333444444444455555555556666666666777777777788888888889999999999000000000011111111112222222222333333333344444444445555555555666666666677777777778888888888999999999900000000001111111111222222222233333333334444444444555555555566666666667777777777888888888899999999990000000000111111111122222222223333333333444444444455555555556666666666777777777788888888889999999999000000000011111111112222222222333333333344444444445555555555666666666677777777778888888888999999999900000000001111111111222222222233333333334444444444555555555566666666667777777777888888888899999999990000000000111111111122222222223333333333444444444455555555556666666666777777777788888888889999999999000000000011111111112222222222333333333344444444445555555555666666666677777777778888888888999999999900000000001111111111222222222233333333334444444444555555555566666666667777777777888888888899999999990000000000111111111122222222223333333333444444444455555555556666666666777777777788888888889999999999000000000011111111112222222222333333333344444444445555555555666666666677777777778888888888999999999900000000001111111111222222222233333333334444444444555555555566666666667777777777888888888899999999990000000000111111111122222222223333333333444444444455555555556666666666777777777788888888889999999999000000000011111111112222222222333333333344444444445555555555666666666677777777778888888888999999999900000000001111111111222222222233333333334444444444555555555566666666667777777777888888888899999999990000000000111111111122222222223333333333444444444455555555556666666666777777777788888888889999999999000000000011111111112222222222333333333344444444445555555555666666666677777777778888888888999999999900000000001111111111222222222233333333334444444444555555555566666666667777777777888888888899999999990000000000111111111122222222223333333333444444444455555555556666666666777777777788888888889999999999000000000011111111112222222222333333333344444444445555555555666666666677777777778888888888999999999900000000001111111111222222222233333333334444444444555555555566666666667777777777888888888899999999990000000000111111111122222222223333333333444444444455555555556666666666777777777788888888889999999999000000000011111111112222222222333333333344444444445555555555666666666677777777778888888888999999999900000000001111111111222222222233333333334444444444555555555566666666667777777777888888888899999999990000000000111111111122222222223333333333444444444455555555556666666666777777777788888888889999999999000000000011111111112222222222333333333344444444445555555555666666666677777777778888888888999999999900000000001111111111222222222233333333334444444444555555555566666666667777777777888888888899999999990000000000111111111122222222223333333333444444444455555555556666666666777777777788888888889999999999000000000011111111112222222222333333333344444444445555555555666666666677777777778888888888999999999900000000001111111111222222222233333333334444444444555555555566666666667777777777888888888899999999990000000000111111111122222222223333333333444444444455555555556666666666777777777788888888889999999999000000000011111111112222222222333333333344444444445555555555666666666677777777778888888888999999999900000000001111111111222222222233333333334444444444555555555566666666667777777777888888888899999999990000000000111111111122222222223333333333444444444455555555556666666666777777777788888888889999999999000000000011111111112222222222333333333344444444445555555555666666666677777777778888888888999999999900000000001111111111222222222233333333334444444444555555555566666666667777777777888888888899999999990000000000111111111122222222223333333333444444444455555555556666666666777777777788888888889999999999000000000011111111112222222222333333333344444444445555555555666666666677777777778888888888999999999900000000001111111111222222222233333333334444444444555555555566666666667777777777888888888899999999990000000000111111111122222222223333333333444444444455555555556666666666777777777788888888889999999999000000000011111111112222222222333333333344444444445555555555666666666677777777778888888888999999999900000000001111111111222222222233333333334444444444555555555566666666667777777777888888888899999999990000000000111111111122222222223333333333444444444455555555556666666666777777777788888888889999999999000000000011111111112222222222333333333344444444445555555555666666666677777777778888888888999999999900000000001111111111222222222233333333334444444444555555555566666666667777777777888888888899999999990000000000111111111122222222223333333333444444444455555555556666666666777777777788888888889999999999000000000011111111112222222222333333333344444444445555555555666666666677777777778888888888999999999900000000001111111111222222222233333333334444444444555555555566666666667777777777888888888899999999990000000000111111111122222222223333333333444444444455555555556666666666777777777788888888889999999999000000000011111111112222222222333333333344444444445555555555666666666677777777778888888888999999999900000000001111111111222222222233333333334444444444555555555566666666667777777777888888888899999999990000000000111111111122222222223333333333444444444455555555556666666666777777777788888888889999999999000000000011111111112222222222333333333344444444445555555555666666666677777777778888888888999999999900000000001111111111222222222233333333334444444444555555555566666666667777777777888888888899999999990000000000111111111122222222223333333333444444444455555555556666666666777777777788888888889999999999000000000011111111112222222222333333333344444444445555555555666666666677777777778888888888999999999900000000001111111111222222222233333333334444444444555555555566666666667777777777888888888899999999990000000000111111111122222222223333333333444444444455555555556666666666777777777788888888889999999999000000000011111111112222222222333333333344444444445555555555666666666677777777778888888888999999999900000000001111111111222222222233333333334444444444555555555566666666667777777777888888888899999999990000000000111111111122222222223333333333444444444455555555556666666666777777777788888888889999999999000000000011111111112222222222333333333344444444445555555555666666666677777777778888888888999999999900000000001111111111222222222233333333334444444444555555555566666666667777777777888888888899999999990000000000111111111122222222223333333333444444444455555555556666666666777777777788888888889999999999000000000011111111112222222222333333333344444444445555555555666666666677777777778888888888999999999900000000001111111111222222222233333333334444444444555555555566666666667777777777888888888899999999990000000000111111111122222222223333333333444444444455555555556666666666777777777788888888889999999999000000000011111111112222222222333333333344444444445555555555666666666677777777778888888888999999999900000000001111111111222222222233333333334444444444555555555566666666667777777777888888888899999999990000000000111111111122222222223333333333444444444455555555556666666666777777777788888888889999999999000000000011111111112222222222333333333344444444445555555555666666666677777777778888888888999999999900000000001111111111222222222233333333334444444444555555555566666666667777777777888888888899999999990000000000111111111122222222223333333333444444444455555555556666666666777777777788888888889999999999000000000011111111112222222222333333333344444444445555555555666666666677777777778888888888999999999900000000001111111111222222222233333333334444444444555555555566666666667777777777888888888899999999990000000000111111111122222222223333333333444444444455555555556666666666777777777788888888889999999999000000000011111111112222222222333333333344444444445555555555666666666677777777778888888888999999999900000000001111111111222222222233333333334444444444555555555566666666667777777777888888888899999999990000000000111111111122222222223333333333444444444455555555556666666666777777777788888888889999999999000000000011111111112222222222333333333344444444445555555555666666666677777777778888888888999999999900000000001111111111222222222233333333334444444444555555555566666666667777777777888888 ]
[                12345678901234567890123456789012345678901234567890123456789012345678901234567890123456789012345678901234567890123456789012345678901234567890123456789012345678901234567890123456789012345678901234567890123456789012345678901234567890123456789012345678901234567890123456789012345678901234567890123456789012345678901234567890123456789012345678901234567890123456789012345678901234567890123456789012345678901234567890123456789012345678901234567890123456789012345678901234567890123456789012345678901234567890123456789012345678901234567890123456789012345678901234567890123456789012345678901234567890123456789012345678901234567890123456789012345678901234567890123456789012345678901234567890123456789012345678901234567890123456789012345678901234567890123456789012345678901234567890123456789012345678901234567890123456789012345678901234567890123456789012345678901234567890123456789012345678901234567890123456789012345678901234567890123456789012345678901234567890123456789012345678901234567890123456789012345678901234567890123456789012345678901234567890123456789012345678901234567890123456789012345678901234567890123456789012345678901234567890123456789012345678901234567890123456789012345678901234567890123456789012345678901234567890123456789012345678901234567890123456789012345678901234567890123456789012345678901234567890123456789012345678901234567890123456789012345678901234567890123456789012345678901234567890123456789012345678901234567890123456789012345678901234567890123456789012345678901234567890123456789012345678901234567890123456789012345678901234567890123456789012345678901234567890123456789012345678901234567890123456789012345678901234567890123456789012345678901234567890123456789012345678901234567890123456789012345678901234567890123456789012345678901234567890123456789012345678901234567890123456789012345678901234567890123456789012345678901234567890123456789012345678901234567890123456789012345678901234567890123456789012345678901234567890123456789012345678901234567890123456789012345678901234567890123456789012345678901234567890123456789012345678901234567890123456789012345678901234567890123456789012345678901234567890123456789012345678901234567890123456789012345678901234567890123456789012345678901234567890123456789012345678901234567890123456789012345678901234567890123456789012345678901234567890123456789012345678901234567890123456789012345678901234567890123456789012345678901234567890123456789012345678901234567890123456789012345678901234567890123456789012345678901234567890123456789012345678901234567890123456789012345678901234567890123456789012345678901234567890123456789012345678901234567890123456789012345678901234567890123456789012345678901234567890123456789012345678901234567890123456789012345678901234567890123456789012345678901234567890123456789012345678901234567890123456789012345678901234567890123456789012345678901234567890123456789012345678901234567890123456789012345678901234567890123456789012345678901234567890123456789012345678901234567890123456789012345678901234567890123456789012345678901234567890123456789012345678901234567890123456789012345678901234567890123456789012345678901234567890123456789012345678901234567890123456789012345678901234567890123456789012345678901234567890123456789012345678901234567890123456789012345678901234567890123456789012345678901234567890123456789012345678901234567890123456789012345678901234567890123456789012345678901234567890123456789012345678901234567890123456789012345678901234567890123456789012345678901234567890123456789012345678901234567890123456789012345678901234567890123456789012345678901234567890123456789012345678901234567890123456789012345678901234567890123456789012345678901234567890123456789012345678901234567890123456789012345678901234567890123456789012345678901234567890123456789012345678901234567890123456789012345678901234567890123456789012345678901234567890123456789012345678901234567890123456789012345678901234567890123456789012345678901234567890123456789012345678901234567890123456789012345678901234567890123456789012345678901234567890123456789012345678901234567890123456789012345678901234567890123456789012345678901234567890123456789012345678901234567890123456789012345678901234567890123456789012345678901234567890123456789012345678901234567890123456789012345678901234567890123456789012345678901234567890123456789012345678901234567890123456789012345678901234567890123456789012345678901234567890123456789012345678901234567890123456789012345678901234567890123456789012345678901234567890123456789012345678901234567890123456789012345678901234567890123456789012345678901234567890123456789012345678901234567890123456789012345678901234567890123456789012345678901234567890123456789012345678901234567890123456789012345678901234567890123456789012345678901234567890123456789012345678901234567890123456789012345678901234567890123456789012345678901234567890123456789012345678901234567890123456789012345678901234567890123456789012345678901234567890123456789012345678901234567890123456789012345678901234567890123456789012345678901234567890123456789012345678901234567890123456789012345678901234567890123456789012345678901234567890123456789012345678901234567890123456789012345678901234567890123456789012345678901234567890123456789012345678901234567890123456789012345678901234567890123456789012345678901234567890123456789012345678901234567890123456789012345678901234567890123456789012345678901234567890123456789012345678901234567890123456789012345678901234567890123456789012345678901234567890123456789012345678901234567890123456789012345678901234567890123456789012345678901234567890123456789012345678901234567890123456789012345678901234567890123456789012345678901234567890123456789012345678901234567890123456789012345678901234567890123456789012345678901234567890123456789012345678901234567890123456789012345678901234567890123456789012345678901234567890123456789012345678901234567890123456789012345678901234567890123456789012345678901234567890123456789012345678901234567890123456789012345678901234567890123456789012345678901234567890123456789012345678901234567890123456789012345678901234567890123456789012345678901234567890123456789012345678901234567890123456789012345678901234567890123456789012345678901234567890123456789012345678901234567890123456789012345678901234567890123456789012345678901234567890123456789012345678901234567890123456789012345678901234567890123456789012345678901234567890123456789012345678901234567890123456789012345678901234567890123456789012345678901234567890123456789012345678901234567890123456789012345678901234567890123456789012345678901234567890123456789012345678901234567890123456789012345678901234567890123456789012345678901234567890123456789012345678901234567890123456789012345678901234567890123456789012345678901234567890123456789012345678901234567890123456789012345678901234567890123456789012345678901234567890123456789012345678901234567890123456789012345678901234567890123456789012345678901234567890123456789012345678901234567890123456789012345678901234567890123456789012345678901234567890123456789012345678901234567890123456789012345678901234567890123456789012345678901234567890123456789012345678901234567890123456789012345678901234567890123456789012345678901234567890123456789012345678901234567890123456789012345678901234567890123456789012345678901234567890123456789012345678901234567890123456789012345678901234567890123456789012345678901234567890123456789012345678901234567890123456789012345678901234567890123456789012345678901234567890123456789012345678901234567890123456789012345678901234567890123456789012345678901234567890123456789012345678901234567890123456789012345678901234567890123456789012345678901234567890123456789012345678901234567890123456789012345678901234567890123456789012345678901234567890123456789012345678901234567890123456789012345678901234567890123456789012345678901234567890123456789012345678901234567890123456789012345678901234567890123456789012345678901234567890123456789012345678901234567890123456789012345678901234567890123456789012345678901234567890123456789012345678901234567890123456789012345678901234567890123456789012345678901234567890123456789012345678901234567890123456789012345678901234567890123456789012345678901234567890123456789012345678901234567890123456789012345678901234567890123456789012345678901234567890123456789012345678901234567890123456789012345678901234567890123456789012345678901234567890123456789012345678901234567890123456789012345678901234567890123456789012345678901234567890123456789012345678901234567890123456789012345678901234567890123456789012345678901234567890123456789012345678901234567890123456789012345678901234567890123456789012345678901234567890123456789012345678901234567890123456789012345678901234567890123456789012345678901234567890123456789012345678901234567890123456789012345678901234567890123456789012345678901234567890123456789012345678901234567890123456789012345678901234567890123456789012345678901234567890123456789012345678901234567890123456789012345678901234567890123456789012345678901234567890123456789012345678901234567890123456789012345678901234567890123456789012345678901234567890123456789012345678901234567890123456789012345678901234567890123456789012345678901234567890123456789012345678901234567890123456789012345678901234567890123456789012345678901234567890123456789012345678901234567890123456789012345678901234567890123456789012345678901234567890123456789012345678901234567890123456789012345678901234567890123456789012345678901234567890123456789012345678901234567890123456789012345678901234567890123456789012345678901234567890123456789012345678901234567890123456789012345678901234567890123456789012345678901234567890123456789012345678901234567890123456789012345678901234567890123456789012345678901234567890123456789012345678901234567890123456789012345678901234567890123456789012345678901234567890123456789012345678901234567890123456789012345678901234567890123456789012345678901234567890123456789012345678901234567890123456789012345678901234567890123456789012345678901234567890123456789012345678901234567890123456789012345678901234567890123456789012345678901234567890123456789012345678901234567890123456789012345678901234567890123456789012345678901234567890123456789012345678901234567890123456789012345678901234567890123456789012345678901234567890123456789012345678901234567890123456789012345678901234567890123456789012345678901234567890123456789012345678901234567890123456789012345678901234567890123456789012345678901234567890123456789012345678901234567890123456789012345678901234567890123456789012345678901234567890123456789012345678901234567890123456789012345678901234567890123456789012345678901234567890123456789012345678901234567890123456789012345678901234567890123456789012345678901234567890123456789012345 ]

[BREAKPOINTS     .................................................................................................................................................................................................................................................................................................................................................................................................................................................................................................................................................................................................................................................................................................................................................................................................................................................................................................................................................................................................................................................................................................................................................................................................................................*....................................................................................................*...........................................................................................................................................................................................................................................................................................................................................................................................................................................................................................................................................................................................................................................................................................................................................................................................................................................................................................................................................................................................................................................................................................................................................................................................................................................................................................................................................................................................................................................................................*................................................................................................................................................................................................................................*..............................................................................................................................................................................*....................................................*................................................*..............................................................................................................................................................................................................................................................................................................................................................................................................................................................................................................................................................................................................................................................................................................................................................................................................................................................................................................................................................................................................................................................................................................................................................................................................................................................................................................................................................................................................................................................................................................................................................................................................................................................................................................................................................................................................................................................................................................................................................................................................................................................................................................................................................................................................................................................................................................................................................................................................................................................................................................................................................................................................................................................................................................................................................................................................................................................................................................................................................................................................................................................................................................................................................................................................................................................................................................................................................................................................................................*....................*..........................................................................................................................................................................................................................................................................................................................................................................................................................................................................................................................................................................................................................................................................................................................................................................................................................................................................................................................................................................................................................................................................................................................................................................................................................................................................................................................................................................................................................................................................................................................................................................................................................................................................................................................................................................................................................................................................................................................................................................................................................................................................................................*......................................................*............................................................................................................................................................................................................................................................................................................................................................................................................................................**.......................................................................................................................................................................................................................................*................................................................................................................................................................................................................................................................................................................................................................................................................................................................................................................................................................................................................................................................**....................................................................................................................................................................................................................................................*............................................................................................................................................................................................................................................................................................................................................................................................................................................................................................*....*............................... ]	

	PMVCG        AAATTAAAACATAACA-TACAACATAAACGAAAGCAATCAAATTTTCAAGCATTTTTCTTGAGCTCTT----------------------------TGAT-TTTTCCTGCATA---------------------------------------------------------AATTAAGCACTT-----------------------------------------------------------------------------------------------------------------------------------------------------------------------------------------------------------------------------------------------------------------------------------------------------------------------------------------------------------------------------------------------------------------------------------------------------------------------------------------------------------------------------------------------------------------------------------------------------------------------------------------TGATCAACAACATAGTCTCGATTTGAATATTTCAATTGTTTCCAGTTTTCTCTAATAGCACTCCATACTAAAATGGCAACCAGTGTTATTCAGTTTGGTTCATTTGTGTGCAATCTTCCAAAGTCCCAGCCACTATGCACAACTGTGCACTGCCCAAAACAGAGCATGAGCACTAATATAGTGCGCCCAAGTGATCCGTTTGCTGAGCTCGAGAAGCATCTTGAACCATACTTGCAGAAGAGGATGGATGCGACAATACGCCAAACTAAAGGCGGGACGCTTGTGTACAAACACATGAGCGAAGCTAAGCGCGCCAGAAAGCTTAGAAAGAAGCAACGTGAGGAAGAAGAGGTGCGTTTGTTCATGAACGCAGCCCCATACATTGTGAGTAACATCACAATAGGGGGAGGGGAGGTGCCCTCTAAAATGGAGGAAGTGTCCATCAAGCGACCGCTGAATAAAACTCCTTCTCGGAAGATTAAGAAATCGCTCACACCAGTGACCTTTAGGGACGGACACATGAACAAGTTTTTGAGAGAACTTAGGGATTGTGCTACCCGTAACAGTATGACAGTACACTTGATTGGAAAGCGGAAAACTGAGCTTGCTTTTAAAAGGCGTGCTAGTTTAAATGCCGTATACGCT-ACACTGCACCATATGCGTGGAGTTGATCGCAAGCGTGATATTGTGCTCGAAGAATGGATGAACGATTATGTTCTAAATCTATCAAAAGTTAGCACATGGGGTTCACTATTTCACGCCGAGTCTTTAAAGCGAGGTGATAGTGGGTTGATACTGAATGCTAGAGCACTGAGAGGTAAATTCGGACGATGTAGCAGAGGATTTTTCATAGTTCGCGGAAAATCGGATGGAGTTGTACTAGATGCAAGATCCAAGCTTTCTATGGCAACTGTAACTCATATGGAACAGTATTCAACACCTGAAGCATTTTGGAGTGGCTTAGAAAAGAAGTGGAGCGTGGTGCGCAAGCCAACCGCACATACTTGTAAACCGACGTATTCGGTTTCAAACTGCGGGGAAGTGGCCGCTATTATAGCGCAAGCTTTATTTCCGTGCCACAAGTTGACGTGTGGTGAATGCTCGAAAGAGATCTGCGATCTCACTTCCAATGAGTGTGTGCAAGAGTTATACAAGAATACTTCCTTGGCACTGGAAAGGATGAACAATCTACACCCTGAATTTCAACACATTGTTAAGGTGTTGAGTGTTGTTAGGCAGCTCACTGAAGCATCCAATCATGGGACGGAAACATTCGATGAAATCTTCAAAATGATTGGATCCAAAACACAAAGTCCTTTCACTCATTTAAATAAACTCAATGAATTTATGTTGAAAGGGAATGAAAATACAAGTGGGGAGTGGTTGACTGCGCGACAACATTTAAGGGAGTTGGTGAGATTTCAAAAGAACAGAACTGATAATATAAAGAAGGGTGACTTAGCATCATTCAGAAATAAGCTTTCTGCTCGTGCACAGTACAATTTGTATTTATCATGCGATAACCAGCTTGACAAGAATGCTAGTTTTCTGTGGGGTCAGCGAGAATACCACGCACGTCGGTTTTTCCTGAACTTCTTCCAACAAATAGACCCATCAAAAGGTTATTTGGCATATGAAGATCGGACGATACCAAATGGTTCTCGGAAGTTAGCTATAGGCAACTTAATTGTTCCACTCGATTTAGCTGAATTCCGAAAACGCATGAATGGCATCGACACTCAGCAACCACCAATTGGTAAGTACTGTACAAGCCAATTGGATGGGAATTTTGTGTATCCGTGCTGCTGTACAACGCTTGATGATGGTCAACCAATTCGATCGGCTGTTTACGCACCAACCAAGAAACATTTAGTTGTTGGTAACACAGGAGACACAAAGTACATCAACTTGCCTAAAGGAGACACAGAAATGCTATACATTGCACTTGATGGCTATTGTTACATTAACATTTATCTGGCAATGTTAGTCAACATAAGCGAGGAAGAGGCTAAGGATTTCACAAAGAAAGTTCGGGACATCTTCATGCCAAAGCTTGGGAAGTGGCCAACGTTGATGGATTTGGCTACAACATGTGCTCAACTTCGAATATTCCACCCTGATGTGCATGATGCAGAGCTGCCTCGTATTTTGGTGGATCACAACACACAAACGTGTCATGTGGTCGATTCATATGGATCAATTAGTACTGGGTATCACATTCTGAAAGCTGCAACTGTTTCACAATTAGTGTTGTTTGCTGACGACAACTTGGAATCTGAGATAAAGCACTATAGAGTTGGTGGAATTGTAGAGAATCATAAAGTGCAAATAGATAACCA-------------ACCTAGTAGATGTGGAGTGAGTGAGTTCCATGCCATACGTATGTTAATTAAAGGGATCTACAGGCCAAGTGTCATGTATGAATTACTCTCTGAAGAACCATACTTGCTAGTGTTCTCCATTCTTTCACCCTCAATATTGATAGCGATGTACAATGATAGGGCTTTTGAATTAGCTGTTCAAATATGGTTAGAGAAGGAACAATCAATTCCACTGATTGCCACTATTTTAACAAACTTGGCAGCGAAGGTTTCTGTGGCCACAACTCTCGTTCAACAATTGCAGTTGATCGAATTATCTGCAGATCAGCTGCTGAATGTGACTTGTGATGGGTTTCGGGTGAGTTTTGCTTATCAATCAGCTCTAACTCTACTCACAAGGATGCGAGATCAAGCCAAAGCAAATAGTGAGTTAATAAGCGGAGGGTTCAATGAATATGACCAGGATTTGGCGTGGACCTTGGAAAAAAATTATCAAGGCCTCTTACACGACCAATGGAAAGAATTAAGCTCGCTGGAAAAATTTCGCTATTATTGGTCCTCAAGAAAGCGAAAGACTCGTTTGCGGTCAAATATCAAAAGCAGAAGTTCGCCCGTTGCCAGCGCAATATCCAGTTTATCACTGAAACCATTTATGGGAAAGGTTTTCTCCCACATGAAAGCAGGAGCAGTGTGCACCAAGCAAGGAACTAAGAATTTTATTGACGCAAGGTGTTTGGGCATTTCAACCTATTTTGTAGGATCACTCATGCGCAAATTTCCTAGTGCGAAAGTATTGCTTAGTAGTTTATTCGTATTGGGAGCGCTTCTAAATATAACACATGCTGCGAATAGGATAATAATTGATAATCGCATTTCACGCGAACATGCAGCAGCATTGGAGCTGTATAGGAAAGAAGATACTTGCCATGAGTTATACACCGCACTGGAGCGGAAGTTGGGAGAGAAACCAACCTGGGACGAGTACTGCTCATATGTGGCTAAGATCAATCCTGCAATGCTGGAATTCATTAAAGACTCATATGATGAAAAACAGGTCGTCCACCAAAGATCAACAGAGGATCTCAAGAAAGTTGAACACATAATAGCATTTGTTACACTGGCAATAATGCTTTTTGACTCTGAAAGGAGTGATTGTGTATTCAAAACTCTGAATAAATTTAAGGGTGTTGTGTGTTCACTAGGCTCAGGAGTTAGACATCAGTCTTTGGATGATTTTGTAAGCACAATGGATGAGAAGAATTTCGTTGTGGATTTCGAATTGAATGATAGTGTCCAAAGGAAGAACCTAACAACTGAGATCACCTTTGAAAGCTGGTGGGATGAGCAAGTCGCTCGGGGTTTCACAATACCACATTATAGAACAGAGGGGAGGTTTATGGAGTTCACAAGAGCAACAGCAGCTAAAGTCGCTAGTGATATATCAATCTCATCTGAGCGCGACTTTTTGATTCGAGGAGCTGTGGGTTCTGGTAAATCCACTGGATTACCACACCACTTGAGCACTTACGGTAGAGTTTTGCTGATAGAACCGACACGGCCATTAGCAGAAAATGTTTTCAAGCAGTTATCTGGTGGTCCATTTTTCCTAAAACCCACAATGAGAATGCGTGGTAATAGTGTGTTTGGGTCGTCGCCTATTTCTGTAATGACAAGTGGGTTCGCTTTGCATTTCTTTGCTAATAACATCACTCAACTTCAAGAGATTCAATTCATAATTATAGATGAGTGCCATGTTATGGATGCATCTTCAATGGCATTTAGGAGCTTAATTCATACATACCACACTAACTGCAAGGTTTTGAAGGTTTCAGCAACACCACCAGGAAGAGAGGTAGAGTTCACAACACAATTCCCAGTGAAATTAGTGGTTGAAGATAGCCTATCTTTTAAGACATTTGTCGAGAGTCAAGGCACAGGTAGCAATTGTGACATGATCCAATACGGAAATAATTTATTAGTGTATGTAGCTAGTTATAATGAAGTAGATCAACTGTCAAAATTACTAGTAGCTCGTGAATTCAATGTCACGAAAGTAGATGGTAGGACAATGAAGCATGGTGAACTCGAGATTGTGACACGAGGCACAAAGAGTAAGCCACATTTTGTTGTCGCCACTAATATTATTGAGAATGGAGTAACTTTAGATATAGATGTTGTTATTGATTTTGGAATGAAAGTTAGCCCATTTTTAGATGTAGATAATAGGTCTGTAGCATACAATAAGGTCTCCATTAGTTACGGAGAACGAATTCAGCGGCTTGGAAGGGTAGGTCGCATACAGAAGGGCACCGCACTTCGGATAGGTCACACTGAGAAAGGGCTAATAGAAATACCTCAAATGATATCAACTGAAGCTGCTCTGTATTGCTTTGCGTACAATTTACCAGTCATGTCTAGTGGCGTCTCCACAAGCATGATTAAAAATTGTACAATACCACAAGTTCGCACAATGCATACATTTGAGTTGAGTCCATTTTTCATGTACAACTTTGTGTCACATGACGGAACAATGCATCCGGTTGTCCATGAAACTCTCAAGCGCTATAAATTGCGTGATTCGGTTATTCCATTAAGTGAGAGTTCAATTCCATACAGAGCTTCTAGTGACTGGATCACAGCTGGTGACTACAGGCGTATTGGAGTGAAACTGGATATTCCAGATGAAACGCGAATTGCATTTCATATCAAGACATTCCACCGCAAATTCACCAACAATTTGTGGGAATCGGTTCTCAAGTATAAGG-CATCTGCAGCATTCCCAACATTGCGATCATCATCAATTACAAAGATTGCGTACACACTGAGCACTGATTTGTATGCAATTCCACGTACTTTAGCAGTTGTGGAAAGCCTGTTGGAAGATGAGAGAACAAAACAATATCAATTCAAAAGCTTAATTGATAATGGTTGCTCAAGTATGTTCTCAGTGGTTGGAATCTCAAATGCACTCAGAGCTAAATATTCGAAAGATCACACTGTGGAGAATATAAATAAGCTTGAAACTGTCAAAGCACAACTCAAAGAGTTCCACAATCTGAATGGCTCTGGTGATGAGTTAAATTTGATCAAGAGATTCGAGTCACTACAGTTTGTGCATCACCAGTCCAAGTCTTCTCTTGCGAAGGCTCTTGGATTAAGAGGTGTTTGGAATAAATCACTCATTGTTCGCGATGCGATCATTGCGGCCGGTGTTGCATGTGGTGGTGCATGGCTATTGTATACGTGGTTCACCGCGAAAATGTCTGAAGTGAGTCATCAAGGACGCTCTAAGACGAAAAGAATTCAGGCATTGAAATTCAGGAAGGCACGTGATAAGAGAGCTGGATTTGAGATTGATAACAATGAAGATACTATTGAAGAGTACTTCGGTTCTGCTTATACCAAGAAAGGAAAAGGTAAAGGCACAACTGTTGGCATGGGCAGAACAAACAGACGATTTATCAACATGTATGGGTTTGAGCCCGGACAATTCTCTTACATCAAATTTGTTGATCCGCTCACAGGTGCACAAATGGAGGAAAATGTTTACGCTGATATAGTCGATGTGCAAGAAAAGTTTGGTGATATTCGGAGGCAAATGATACTTGATGACGAATTGGATCGTCGACAAACAGATGTCCATAACACTATTCATGCTTACCTCATTAAAGATTGGTCAAATAAGGCATTGAAAGTGGACTTGACTCCGCATAATCCTCTTCGGGTAAGTGATAAGGCAAGCGCTATAATGAAATTCCCTGAGCGGGAGGGAGAATTGCGCCAAACTGGACAAGCAGTGGAGGTTGATGTTTGCGACATACCAAAAGAAGTAGTGAAGCACGAAGCGAAAACTTTGATGAGGGGCCTTCGTGATTACAATCCAATAGCCCAAACTGTTTGCAAGTTGACTGTAAAATCCGAACTGGGTGAAACATCAACATATGGTTTAGGTTTCGGTGGGTTAATTATTGCAAATCACCATTTGTTCAAGAGCTTTAATGGCAGTCTCGAAGTTAAATCACATCATGGGGTTTTTAGAGTGCCAAACCTGATGGCCATAAGCGTCTTACCGTTGAAGGGGAGAGATATGATCATAATTAAGATGCCAAAGGATTTCCCAGTCTTCCCACAACGACTCAAATTCAGAGAGCCTGCCTCAACAGATAGAGTGTGTCTCATTGGATCAAACTTCCAAGAAAGATACATTTCTACAACAGTGTCGGAAATCAGTGCCACGCATCCAGTCCCACGCAGCACATTTTGGAAGCATTGGATCTCTACAGATGATGGTCATTGTGGTTTGCCTATTGTTAGCACAACAGATGGATTTATCCTAGGGCTACATAGTCTAGCAAATAATAGGAACAGTGAAAATTATTACACTGCTTTCGACTCCGATTTTGAAATGAAAATATTGAGGAGTGGAGAAAATACCGAGTGGGTAAAGAATTGGAAATATAATCCAGACACAGTTCTATGGGGACCTCTACAACTCACTAAGGGAACACCAAGTGGAATGTTTAAAACCACAAAGATGATTGAAGATTTACTGGCATTCAAGAGTGAAAGTGTGAGGGAACAAGCACACACATCATCTTGGATGCTTGAAGTCTTGAAAGAGAATTTGAAGGCCATTGCATATATGAAGAGTCAGCTCGTCACCAAGCATGTTGTGAAGGGTGAGTGTATGATGTTCAAACAGTATTTGCAGGAAAACCCCAGGGCAAATGAA------TTTTTCCAGCCTAAGATGTGGGCGTATGGAAAGAGTATGTTGAATAAGGAAGCCTATATCAAGGATATAATGAAATATTCAAAGGTTATTGATGTAGGAGTAGTCGATTGCGACCGGCATTTGAGGAAGCTATCGTTAGAGTTATTGTATACT--CAG-ATCCACGGCTTTCGCAAATGTTCTTACATCACAGATGAAGAGGAGATATTCAAGGCATTGAATATAACCACAGCTGTTGGAGCTATGTATGGGGGGAAGAAAAAGGAGTACTTTGAAAAGTTCACAACAGAGGATAAGGCTGAGATTCTCCGGCAAAGCTGTTTGAGGTTGTACACGGGTAAACTGGGTGTGTGGGAATGGGCTCTAAAAGCTGAACTGAGAAGTAAGGAAAAGATAGAAGCCAATAAGACACGGACTTTCACAGCAGCCCCAATTGATACACTATTAGGTGGTAAGGTGTGTGTAGATGATCTCAACAACCAGTTTTATTCGAAAAATATTGAATGTTGTTGGACGGTTGGAATGACCAAATTCTATGGTGGATGGGATAAGCTTTTGACAGCTCTGCCTGCTGGAT---GGATATATTGCGATGCAGATGGTTCGCAATTCGATAGTTCATTGACACCTTATCTCATAAATGCTGTATTGACTATACGGTATGCTTTTATGGAAGATTGGGACATTGGGTATAAGATGTTGCAAAACTTGTACACAGAAATAATCTACACACCAATATCCACGCCTGATGGAACAATTGTGAAGAAGTTCAGAGGCAATAACAGTGGGCAACCTTCCACCGTTGTAGACAACTCACTTATGGTTGTGCTTGCTATGCATTATGCATTTGTACGGGAAGGTATAGCATTTGAAGAAATTGACTCCATATGTAAGTTCTTCGTTAATGGAGACGATTTGCTAATAGCTGTGAACCCAGAACGTGAGAGCCTATTGGACACACTGTCGAATCATTTTTCTGATTTAGGGCTCAATTATGATTTCTCATCTCGGACGAGGAATAAATCAGAATTGTGGTTCATGTCACATTGTGGGATTTCTGTTGAAGGCACGTATATACCGAAGCTTGAAGAGGAGCGAATTGTATCAATTCTCCAATGGGACCGAGCAGAGCTACCAGAATACAGATTGGAGGCTATTTGTGCAGCAATGATTGAATCATGGGGCTACCCACAATTAACTCATGAAATTCGAAGATTCTATAGCTGGTTAATTGAGAAGAACCCATACGCTGACTTGGCATCTGAAGGAAAAGCTCCATACATTTCTGAACTAGCTCTAAAGAAGCTGTATCTGAATCAAGATGTACA-AATGATGAGCTTCAGGTCTTACCTCAAGTATTTCGCTGATGCAGATGAAGAGTTTGAATGCGGTACATATGAAGTTCGTCATCAGAGCAGCTCAAGATCAGACACATTGGATGCTGGAGAGGAGAAAAAGAAAAAT---AAAGAAGTGGCCACTGTGTCCG---------ATGGAATGGGAAAGAAGGAGGTTGAATCAACACGCGATTCT------GATGTGAATGCGGGAACTGTTGGAACATTCACCATTCCAAGAATCAAATCAATCACTGAAAAGATGCGTATGCCTAAACAGAAGAGAAAGGGTGTTCTCAACTTGGCTCATTTACTTGAATACAAACCAAGCCAAGTTGACATATCGAACACTCGTTCAACCCAGGCACAATTTGACAATTGGTATTGTGAAGTTATGAAGGCATACGATCTACAAGAGGAGGCAATGGGTACAGTGATGAATGGCTTAATGGTTTGGTGCATTGAAAATGGCACGTCCCCAAACATTAGTGGAACATGGACCATGATGGATGGAGACGAACAAGTGGAATTCCCATTAAAGCCCGTGATAGAGAATGCCAAGCCGACTTTTCGGCAAATAATGGCGCACTTTTCTGATGTGGCTGAGGCATATATAGAAATGCGCAATAAGCAAGAACCATACATGCCACGATATGGTTTGGTTCGAAATTTACGAGACATGGGTCTGGCTCGATACGCATTTGACTTCTATGAAGTCACATCACGTACGTCAACACGTGCTCGCGAAGCCCATATCCAAATGAAAGCAGCAGCATTGAAATCTGCTCAAACAAGGTTATTTGGATTGGATGGTGGCATAGGAACACAAGGAGAAAACACAGAGCGCCACACCACTGAAGATGTGAGCCCCGACATGCATACCTTGCTTGGGGTCAGGGAAATGTGACTGATGTGGTCTCTGGGATGAAATATTATTATATGTAGTATGCAATATATAGTATGGCTTTTC--------------------------------------------------------------------------------------------------------------TCGTTCCAGTCTTTATATTAATGAGAGTAACTTAAGTAAGTAATTTGTACTTCAAGGATTAATCAAGGTGACTCTCTGACACTCTCAGTGAGGTGACTTGTTTAGTCTGAGTTTACTTATTGTGAGTATAAAGAATCTCTCAGAAAACGA-----------------------------------------------------------------------------------------------------------------------------------------------------------------------------------------GAGTGACTTCTAGACACACTCTAGGAGGTGATCGTAGTTGGCATGAGAGAGAC
	SCMVCommon2  AAATTAAAACAAAACATCACAACACAACTGAAAACATACAA--GCATACAGAATTT-CTTGCAATCTC---TAAGCAATTCAGTAAACTTAAATCCTTTTCAGTAAAATTAAC---------------------------------------------------------AATCAATCAAAT----------------------------------------------------------------------------------------------------------------GGCAGCAACACACACCATGGATTACGCAACATTCCGCAAGTTCAATAAGCAAACTGAAGGTCGATTCAACAAGCATCATCTAGCTCGTCACAATGCGGCCGTCAAGCGTGGATTCGTATACAACTTCGATGAAGATTGTTACGAATGTCCCACTTGTGAACAAGTGTTCTGGCGTGTCGAGGAGATTGACAATGAGCACTGCTGTGAAGACTATTTGGAGCAGGTCGACTTCAACTACCGCGAAGAGCAACAAAACATTCAAGATTTCATTAGGAAAGCTCAAGCAGCAGTAGTTGAAGCTACATCTGAAACTAATGTTGAACAGCAGACTGGTGAAACTATGATGTTCGGATCTTTTCCATCAAACATTCCATTTGTTTCTCACACAGTGCCTGTGTCTGAGTCTTCCAAGGGCCTCGATGAAGTGACAAACTCAACACTGGAAGCTCGGGAAACAGTTGTCTTCACTGTGAAAACTCTCAGCACTGATACGCCAATGGCAAAG------------------------------------------------------------------------------------------------------------------------------------------------------------------------------------------TGCACTGATCCGTTCGACAAGCTCGATGAGATCCTTGCCAAGAGATTGGAGAAACAAGCATTCGCTACTATAACTAAGCGAAAAGATGGCACACTCTTTTATAAATACAGGAGCAACAAGCAGCTCGATAAGATAAAATCAAAAATCCAAAAACAGAAGGAGGAGGAGGAGAAGTTTCAACAGTCACCACCTACCATAATCACACGCATATCAATAGCTGGTGGTCCTGCGCCATCTCAAGTCATGGAGATTGGTGGCAAGAGAGGCATTCACACAGTGCCTAGCATGAAGACGAAACGAGCTTTCAAGAAACAGAACATGACAGATGCTCAATTCACTAACTTTATCAAGAAGATTAAGAGCATCATGGCACAGAAGCATGCATCTGTGGAAATCATCACTAAGAAATCCACAAAATTGGACTATGTCACAAGGAGTCACAAAACTTGTGCACGCGTTGCTGTTCTC-CATCTGAAGGGAATAAAGAGAAGAGTGGATTTTTCCTGCGACTCATGGACATCCAACATAGTTAAGCAACTCTCAAAGGTTGGTAAGTGGCAGGATCAAGTGCACACAACTCAATTGCGTAAGGGTGATAGTGGTGTTGTTCTAAATGCCAAGAAACTTAAAGGGCACCAGTCACGGTCATGGAATGGTATGTTTATCGTGCGCGGAGTTTACGAAGGCAAATTATTTGATGCTAGAACGAAAGTGACTTTGACAACAATGCTTCGAATGGCACAATTTTCGCATGCCACTGAGTTTTGGAAAGGAATTGATGGCAATTGGGCTAAATATCGTTATCCAACTGATCATGATTGCACACCAGACATATCAGTTGCAGATTGCGGTCGAATGGCAGCATTAGTAACTCACAGCATAATTCCATGCTCCAAAATAACCTGTAAAGAGTGCGCTCGGAAGTATGCAGAAATGCCCGTTGAAGAGCTCATGGCAATGTTGCACAAGCACGCGCATGAAGGCTTGGAAAGGCTTGGTGTTGATAGGAGTGTTTTCCCACATGTGGAGCAGCTTTTGAAGGTTGTTAGATGTTTCTCAGAACCAACTGCAGTGAACCCAGACTATTTTGATGAGATGTACAAATCAATTGGTGACAAGCAGCATGGGCCCTTCAAACATTTAAACATTTTAAACAACTTTTTCTTGAAAGGGAAAATGAATAATTCGCAGGAGTGGGTAGAAGCACAAAAGAGTTTGCTCGAGCTGGCCAGATTTCAGAAAAACCGAACTGATAACATAAAGAAAGGTGACATTGCATCTTTCCGGAACAAGTTGTCAGCAAAAGCAAATTGGAACTTTTATTTATCTTGTGACAACCAACTGGACAAAAATGCCAATTTTGTGTGGGGTCAACGTGAGTATCATGCAAAGCGTTTCTTTTCTAATTTCTTTGAGGAGATTGACCCATCAAAAGGATATTTATCCTATGAAATCAGAGTCCATCCAAATGGAGCACGGAAATTGTCAATTGGAAACTTGATTGTTCCGCTAGATCTTGCAGAATTTAGGCAAAAGATGAAAGGAGATTTCATTAAACAGCCTACTGTTGGGAAGCAATGTACAAGTCTGAAGGAAGGAAACTTTGTGTACCCATGTTGTTGCACTACACTGGATGATGGCACAGCAGTTGAATCAACATTCTATCCACCAACGAAGAAGCATATGGTGATTGGGAACAGTGGAGATCAAAAGTACGTTGATTTGCCAAAAGGAGATACGGAAATGTTGTATATAGCAAAAGAAGGATATTGTTATATTAACATTTATTTGGCGATGCTTATCAACGTAAATGAAGAAGATGCAAAAGACTTCACCAAGAAAGTTCGTGATCTGTGTGTCCCTAAACTTGGGAAGTGGCCAACTCTCATGGATTTAGCAACCACTTGCGCACAATTGCGAATTTTCTATCCTGATGTTCATGATGCTGAATTGCCAAGGATATTGGTGGATCACAACACACAAACTTGTCACGTTGTTGATTCATTCGGGTCTATAACGACTGGATTTCACATTCTGAAGGCAGCTACAGTTTCACAACTAATTCTGTTCGCTAACGACGAATTGGAATCAGACATCAAACATTACAGAGTTGGTGGAACTCCTGAAAATGCGGACTCACTTCGTGATGGCGA-GTCTCCATTTGGCCCTAGCAAAGTGATGATTAGCGAATTCGAGGCTACGAAAGTTTTACTCAAAGGCATCTTCCGACCAAAAATCATGAAGCAGCTCTTAATTGATGAACCATACATCATGTTAATGGCGATGCTATCACCCGGGATTTTATTGGCAATGTACAACAATGGTTCTTTTGAAATCGCTGTTAAGCTCTGGATAAATGAGAAACAATCACTAGCCATGATAGCAACCATGTTGTCGTCACTTGCAACTAAGGTTTCAGTTTCAGAAACTTTATTGGCACAACGTAGAATTATGGATACAGCAGCGAGTGACTTATTGGATGTCACATGTGATGGGTTTAAAATGCATCTAACTTACATGACTGCAATCCAATTACTTCAGCGCACCAAAGAGAAGGCACATAGTGATGAAGCTTTGTATACCAATGGGTTCATGAATTATGAGAGAGAAGTACTTCACCTCATGGAAAAAAGTTATCTAGATCTCTTACACGAGGCATGGTGCGACTTAACTTGGTGGGAAAAATTATCTGCAATTTGGCATTCACAAAAAGCCAAGCGACTTATTGCTCAACCTTTGCGACCCATCGGAAAAGCAGATTTGAGGGGCTTGTACGACATATCACCAAGTGCATGTTTGGAAAGGAGTTTAAAAGCTTTCAAGAACGGAAAAGAGAATGTCAGTAAGAGTATTAGGTTGTATGTGCATAATAAGACAGTTAAAGTCACTTCTTTCTTTGTTAATAAAATTTTCCGTAGTCTCCCTTCTTTAGTTGTTTTTACTAATGTGATTACGATAACTAGTTTGTTGGGTAGTATAATTTTAGTTCTACAAGGTTTAATAATAGAGCATAAAATGTATAAAAGAAAAATTCAACAAATCGAGATAGAGAGCAACGAAAAAGTTTGTGTTGAGCTTTATGCTTCCCTCCAAGCCAAGTTGCAAAGAGAATTCACTTGGGAAGAGTACATTGAGTATCTGGAAACGGTGAACCCGAGCATCGTCGACTTCGCTAAGAAACAAATGGAACAATACTCTGTCAAACATCAGAAGAGTACACCGGAAGTCAAAAACCTGGAGCAGGTAATTGCATTCATAACGTTAATAACAATGCTTTTTGACTCCGAAAGAAGTGACTGTGTGTTCAAAACGTTAAACAAGCTAAAGGGTATTGTCTCAACGTTAGATTGTGAAGTTCGACACCAATCCTTAGATGACTACATGGAAAATTTTGATGTTCGCAATCAAACAGTTGACTTTGAGCTAGACGACGAAATAACACGAGGTAGCCACACACAAGATATAAAATTCACAGACTGGTGGGATCGTCAAATTCAAATGGGGTACACAATACCACATTACAGAACGGAAGGGCATTTTGTGGAATTCACCAGAGCGAGAGCAGTTCAAGTAGCAAGTGACATCGCTCAGAGTGAGCATTTAGATTTCTTAATTCGTGGTGCAGTTGGATCTGGCAAGTCAACTGGCTTACCAGTGCATTTGAGCTCATCTGGCTCCGTTCTGTTAATTGAACCAACAAGGCCCTTAGCTGAAAACGTTTTCAAACAATTATCCAGTGGTCCTTTCTTTCAGAAACCAACGATGCGAATGCGCGGAAACAGTGTCTTTGGCTCGTCACCAATCTCAATCATGACGAGTGGATTTGCTTTGCATTATTTTGCTAATAATCGAAGCCAACTCACAAACTTCAATTATATAATTTTTGACGAATGTCATGTGATGGATGCTTCTGCAATGGCCTTTAGAAGTTTAGTCAGCGTCTTTCACAAGAGTTGCAAAGTGTTGAAAGTTTCCGCTACACCACCAGGAAGAGAAGTTGAGTTCACTACACAGTTCCCTGTTAAACTTATCGTTGAGGACTCCCTTTCTTTTAAGTCATTTGTAGATGCTCAAGGGACTAAAAGTAATGCGGACGTCATTCAACATGGTCACAACGTTCTGGTCTATGTTTCAAGCTACAATGAAGTTGACAGCTTATCGAAGTTGCTAACAGAAAAAGGCATGATGGTGACAAAAGTTGATGGTAGAACTATGAAGCACGGGAGCCTTGAAATCATCACGAAAGGAACGGCAAGTAAACCACATTTCGTTGTAGCCACAAACATAATCGAGAATGGGGTGACACTTGACATAGATGTAGTGGTTGACTTTGGGTTGAAAGTGTCGCCGTTCTTAGATGTGGATTCACGTAGCGTTTCATACAATAAAGTGAATGTCAGCTACGGGGAACGGATTCAAAGGCTTGGGCGAGTTGGAAGGTTTAAACCTGGTGTAGCTTTGCGCATTGGTCACACTGAAAAAGGTCTTATTGAGATTCCGAGCATGATAGCAACAGAGGCTGCGTTAGCTTGTTTCGCATACAACTTACCAGTAATGGCTAGTAATGTCACGACAAGTATAATCGCAAACTGCACGGTTCGGCGAGTTAGAACGATGAATCAGTTTGAGCTCAGTCCATTCTTCACAACAAATTTTGTTTTCTACGACGGCACGATGCACCCAGCAATCCATGAAGCTCTGAAGAAATACAAGCTTCGAGAATCAATCACACCGTTGTGTGAGCAATCAATCCCATATAGGGCTTCGAGCGCTTGGATGTCAGCGTACGAGTATGAAAGAATTGGTGTATCTTTTGATCTTCCCCAGGCAGTGAAGATTGCGTTTCACATCAAAGATATACCAGAGGGACTACACGAAAATCTTTGGAATATTGTGCTCAAGTTTAAAGATGTGTCAATCTTTCCAAGCATC-AGATCATCATCTATTAGCAAGATTGCGTATACGCTGAACACTGATCTTTTTGCAATTCCTCGAACTCTAATTTTAGTGGACAGATTGATAGAAGAAGAGCGCGTGAAGCAAAATCAGTTCAGAAGCTACATCGATGAGGGTTGCAACAGCATGTTTTCAATTGTTAATCTCACCAACACACTGCGTTCTAAATATGCAAAAGATTATACAGCTGAGAACATTAAGAAGCTTGAAATGGTTAAGAGTCAACTGAAAGAATTTTCTAATCTCAATGGATCAGTCGACGAAGAGAACTTAATCTCAAAGTATGAATCATTACAATTTGTTGTCCATCAGTCCAAAGATTCCTTAGCAAAAAGTTTGAACTTGAAGGGAATCTGGTGTAAATCTCTTATGGTCAAGGATGCACTAATAGCAGGAGCGGTGTCGATTGGAGGAGTGTGCATGATTTATCATTGGTTTACACAATCATTCCAGAGTGTATCACATCAAGGGAAGAATAAATCGAAGAGAATTCAAGCTCTCAAGTTCAGACGGGCGCGAGATAAGCGAGCAGGTTTTGAGATTGACAACAATGATGATACAATCGAGGAGTTCTTTGGATCTGCGTACAGAAAGAAAGGAAAGAATCCAGGAAACACAGTTGGAATGGGCAAATCGAACAGGCGTTTCATCAACATGTATGGGTTCGAACCAGGTGAATTTTCTTACATTCAGTTTGTGGACCCCTTAACTGGAGCACAAATTGAAGAGAATGTTTATGCCGACATCGTTGATATTCAGGAGAGATTTGGCGAAATCAGAAGGAAAATGATTGAAGAAGATGAATTGGACTCTCAATCAACGTTAGCGCACACAACAGTTCACGCATACTTGAGAAAGGATTGGTCAGATAAAGCACTAAAAGTTGACCTAATGCCACATAACCCTCTCAAAATTTGCGATAAAACGAATGGTATCGCGAAATTTCCAGAACGCGAAGGAGAGTTGAGGCAAAATGGAGTAGCAGTTGAAGTGAATGTGAGCGATATCCCAACGATCCCTGTCGAACACGAATCAAAATCACTGATGAAAGGGTTGCGTGATTATAATCCTATTGCTCAAACAATTTGCAAACTCAAAGTGACATCCGAATTTGGAACATCTGAGATGTATGGTATTGGTTTCGGTGCATATATCATTTCCAATCATCATTTATTCAAGAGTTTCAATGGGACGTTGGAAGTTCGATCTCATCATGGTACATTCAAGGTGAATAATATGATGGCATTGCAAGTTAAACCAATCGCAGGGAGAGATATAATCATCATAAAGATGCCAAAGGATTTCCCAGTCTTTCCTCAGAAGCTTCATTTTCGGTCTCCCAAAAACAATGAGAGAATGTGTATTGTAGGTACAAATTTCCAAGAAAAATCAGCTTCATCTACAATAACAGAGACAAGTGCTACATACATGGTTCCTAGGAGTTCATTTTGGAAGCATTGGATTGCAACGGATGATGGACATTGTGGATTACCTGTCGTTAGCACGATCGACGGCAAGATAATCGGAATTCATAGCTTGGCAAACAATGCTAATAGTGAAAACTATTACGCAGCGTTTGATGATGATTTCGAAGAGAAATTCCTCAGAACCTCTGAGCACACAGATTGGGTTAAGAACTGGAGATACAACCCAGACACTGTTGTATGGGGACCTTTAAAGCTAACTGAAAGCACACCAAAAGGATTGTTTAAGCCAACCAAGATTCTTGAGGATTTGTT------CGAATACAATTCTGTTCGCGAGCAGTCAAAGAATTCGAACTGGATGTATCAAGCTCTTAGAGATAACTTGCAGGCAGTTGCACATATGAAAAGTCAGTTAGTTACAAAGCACGTTGTCAAGGGCGAGTGCAGATACTTTCAAGAGTTTTTAACAGTTGACAAGGAAGCTTCAAAC------TATTTTAGGCCGCTAATGGATGCATATGGCAAAAGTTTGTTGAATCAGGAAGCATATGTTAAGGACATTATGAAGTATGCTGAGCCTATTGAGATTGGCAGAGTAGATTGCGAT--GCCCTTGAGGAAGCCACACATCGAGTTATCCTTTATTTGCAG-ATGAAAGGTTTTCGGACATGTTCTTATGTGACAGATGAGCAAGCAATATTCAAGGCACTAAACATGAAAGCAGCAGTAGGTGCGATGTATGGAGGAAAGAAAAAGGAATACTTCCAGGACTTTACGGATAAAGACAAGGAGGACATCGTCATGCAGAGTTGTTTGCGGTTGTACAAAGGGGAATTGGGAATTTGGAATGGTTCACTGAAAGCGGAGCTACGTTGTAAAGAGAAAATTATGGCAAATAAAACACGCACCTTCACAGCAGCTCCTCTTGACACGCTTCTTGGTGGAAAGGTTTGTGTTGACGATTTCAACAACCAATTTTATTCGAAGAACATTGAATGTTGTTGGACAGTCGGAATGACCAAGTTTTATGGAGGATGGAATAAATTGCTCAGAAGTCTGCCTGACAACT---GGATATACTGTGACGCGGATGGATCCCGATTTGACAGCTCATTAACTCCATACCTCATAAATGCAGTCTTGGCAATTCGAGCAACTTACATGGAGGATTGGGATATTGGATATCAAATGTTGCAGAACTTGTACACAGAAATTGTGTATACCCCAATCTCAACACCAGATGGAACAGTTGTCAAGAAATTCAGAGGCAACAACAGCGGACAACCATCCACAGTTGTTGACAATTCCTTGATGGTTGTGCTTGCAATGCATTATGCATTTGTGAAAGAATGCATCGATTTTGAGGAAATAGATGAATGTTGCAAGTTCTTTGTCAACGGAGATGATTTGTTGATAGCTGTCAATCCAGAGAAGGAAGACATGCTTGATAGATTTTCAGACCACTTCTCATCCTTAGGCTTAAACTATGATTTCTCATCCAGGACAAAACACAAAGAAGAATTATGGTTTATGTCTCATAGAGGTCTTGAAATTGAAGGCATGTACATTCCAAAATTGGAAGAGGAACGTGTGGTGTCTATCTTGCAATGGGACAGAGCAGAACAACCTGAACACCGACTAGAAGCTATATGTGCAGCAATGATTGAGGCGTGGGGCTATCCTGATTTGATTCATCAGATTCGCAGATTCTATTCATGGTTACTTGAGAAGCAGCCGTTTGCAACACTTGCTGAAGAAGGGAAGGCCCCTTATATTGCGAGCATGGCTTTAAGAAAATTGTACTTGGATAGAACAGTTGACAATAGTGAACTCCACGAGTTTAGAAAATTATTT-GTCGAATTGGATGACGAATTTGAGTGTGGAACGTATGAAGTGCACCATCAAGGTGAC---AACATAGATGCAGGAAAAGACAAGAAAGACGAGAAGAAGGATGATAAAAACAAGCAAGTTGCATCCACAGCTAGTAAAGATGCTGCGAAG---------------------------TCAAAAGATGTCAACGCTGGCACTTCAGGAACACACACAATACCCCGTATCAAAAGCGTAACACCAAAGATGAGAATGCCAAAATCAAAGGGTGCTATAGTTTTGAATCTAGATCATTTGCTCGAGTACACTCCACAACAGGTTGACATATCAAATACTCGCGCAACCCAATCTCAATTTGATACTTGGTATGCAGCAGTTCAACAAGCATACGACATCAGTGAGAGCGAGATGCCGACAGTGATGAATGGACTTATGGTTTGGTGCATTGAAAATGGAACCTCGCCAAATATTAACGGCACTTGGGTGATGATGGAAGGAAGTGAGCAAGTCGAGTTCCCACTCAAACCCGTTATTGAAAATGCAAAACCGACGTTCAGACAAATCATGGCACACTTCTCTGATGTCGCAGAGGCGTATATCGAAATGCGCAACAAAAAGGAACCGTATATGCCACGATACGGTTTAGTTCGAAATTTGCGAGACATGAGTTTAGCTCGTTATGCGTTCGACTTTTATGAACTCACGTCTCAAACTTCAGTCCGAGCTAGAGAAGCGCACATACAAATGAAAGCAGCTGCTTTGAAATCAGCGCAAACACGTATGTTTGGATTGGATGGTGGCATTGGTACAAAAGAGGAAAACACAGAAAGACACACCACCGAGGATGTCAGCCCCAACATGCATACTTTGCTTGGGGTTCGTAACATGTGATCAT-GTGTCTACTGGGATGAAATATAACTATATATCGTATGCAATATATATTTTGGCTTTTCCTGTACTACTTTTATTACGTCTTTACAGT--ATTTCATATTTCAAGCAATAGGAAGTGACTTTGTGATTTCGTCATGAA-GGTGGTTTCTATTTCTTCTTGTATCTGTTT--------------------------------------------------------------------------------------------------------------------------------------------------------------------------------------------------------------------------------------TAGATTATATAAGAGTTCCGGGTTGTTTTCGA-------------------------------------------------------------------------GAGTGATGTTGTGATTCCGTCATAGCAGTGATTGCAGATCTCAATCAGGAGAC
	SCMVCRS2     AAATTAAAACAACTCAATACACCACAACTGAAAACATTCAA--GCATACAGAATTT-CTTGCAATCTT---TAAGCAATTCAGTACACTTAAATCCTTTTCAGAAAAATCAAA---------------------------------------------------------AATCAAGCAAAT----------------------------------------------------------------------------------------------------------------GGCAGCATCACTCACCATGGATTACGCAACATTCCGCAAATTCAATAAGCAAACTGAAGGTCGATTCAACAAGTCCCACTTAGCTCGTCACAACGCAGCCGCTAAGCGTGGATTCGTCTACAATTTCGATGAAGATTGTTACGAATGTCCCACTTGTGAACAAGTATTTTGGCGCGTCGAGGAGATTGACAATGAACATTGCTGTGAAGAATATTTGGAACAGATAGACTCCAACTACCGTGAA---ATCCAAAACTTCATC------------AAAGCTCAAGCAGCAGTAGTTGAAGCCACATCTGAGACTACTGTCGAGCAGCAAACTGGTGGAACTATGATGTTTGGGTCTATTCCATCAAACATACCACTTGTTCCTCGCACAGTACCTGTATCTGAGCATTCCAAGGGCCTCAATGAAATGACAAACTCAACACTGGAAGCTCAGAAGACAGCTATCTTCACTGCAAAAACTCTCAGCACTAATACGCCGATGGTAAAG------------------------------------------------------------------------------------------------------------------------------------------------------------------------------------------TGCACTGATCCGTTCGACAAGCTCGATGAGATTCTTGCCAAGAGATTGGAGAAACAATCATTCGCTACTATAACTGAGCGAAAAGATGGTACACTCTTTTATAAGTATAAGAGCAATAAGCAGCTCGATAAAATAAAATCAAAAATCCAAAAACAGAAGGAGGAAGAGGAGAAGTTTCAACAGTCACCACCTACCATAATCACACGAATATCAATAGCTGGTGGTTCTGCACCATCTCAAGTCATAGAGATTGGTGGCAAGAGAGGCATCCACACAGTGCCTAGTATGAAGACGAAACAAGTTTTCAAGAAGCAAAGCATGACGGATGCTCAATTCACTAACTTTGTCAAGAAGATTAAGAGTATCATGGCACAGAAGCATGCATCTGTGGAAATCATCACTAAGAAATCCACAAGATTGGACTATATCACAAGGAGTCACAAGACTTGTGCACGTGTTGCTGTTCTC-CATCTGAAGGGAATAAAAAGAAGAGTGGATTTTTCATGTGACTCATGGACATCCAATATAGTCAAGCAACTCTCAAAGGTTGATAAGTGGCAAGATCAAGTACACACAACTCAATTGTGCAAGGGTGACAGTGGTGTTGTTCTAAATGCTAAGAAACTTAAAGGGCACCAATCACGATCATGGAACGGTATGTTCATTGTGCGCGGGGTTTACGAAGGCAAGTTATTTGATGCTAGAACGAAAGTGACTTTGACAACAATGCTTCGAATGGCACAATTTTCGCATGCCACTGAGTTTTGGAAAGGAATTGATGGCAATTGGGCTAAATATCGCTATCCAACTGATCATAATTGCACACCAGACATATCAGTTGCAGATTGCGGTCGAATGGCAGCATTAGTAACTCACAGCATAATTCCATGCTTTAAAATAACATGTAAAGAGTGCGCTCGAAAGTATGCGGAAATGCCTGTTGAAGAGCTCATGGTAATGCTGCACAAGCACGCACATGAAGGCCTGGAAAGGCTTGGTGTCGATAGGAGTGTCTTCCCACATGTGGAGCAACTTTTAAAGGTCATTAGATGTTTTTCAGAACCAACCGCAGTGAACCCAGACTACTTTGATGAAATGTATAAATCAATTGGAGATAAGCAGTATGGGCCCTTCAAACATCTAAACACTTTAAACAACTTTTTCTTGAAAGGGAAAATGAACAATTCGCAGGAGTGGGTGGAAGCACAAAGGAGCTTGCTTGAACTGGCTAGATTTCAGAAGAATCGAACTGATAACATAAAGAAAGGTGACATTGCATCTTTCCGAAACAAGTTGTCAGCAAAGGCAAATTGGAATTTTTATCTATCTTGTGACAACCAGTTGGACAAAAATGCCAATTTTGTGTGGGGTCAACGTGAGTACCATGCAAAGCGTTTCTTTTCTAATTTCTTTGAGGAGATTGACCCATTAAAAGGATATTCATCCTATGAAATCAGAGTCCATCCGAATGGAGTACGGAAATTGTCAATTGGAAACTTGATTGTTCCATTGGATCTTGCAGAATTTAGGCAAAAGATGAAAGGAGATTTTATTAAACAGCCTACTGTTGGGAAACAATGTACAAGTTTGAAAGAAGGGAACTTTGTGTACCCATGTTGTTGCACTACAATGGATGATGGTACAGCAGTTGAATCAACATTCTATCCACCAACGAAGAAGCACATGGTGATTGGGAACAGTGGAGATCAAAAATACGTTGATTTACCAAAAGGAGAAACTGAAATGTTATATATAGCAAAAGAAGGATATTGTTATATTAACATTTATTTGGCAATGCTTATCAATGTAAATGAAGAAGATGCTAAGGATTTCACTAAGAAGGTTCGTGATCTATGTGTTCCTAAACTTGGGAAGTGGCCAACTCTCATGGATTTAGCAACCACTTGCGCACAATTGCGTATTTTCTATCCTGATGTCCACGATGCTGAATTGCCAAGGATACTGGTGGATCATAACACACAAACTTGCCACGTTGTTGATTCATTTGGGTCTATAACGACTGGATTCCATATTCTGAAAGCAGCCACAGTCTCACAACTAATTCTGTTCGCTAACGATGAATTGGAGTCGGACATCAAGCATTACAGAGTCGGTGGAATTCCTGAGAATGCGGATTCCCTTCGTGATGGCGC-ATCTCCATTTGGCCCTAGCAAAGTGATGATTAGCGAGTTCGAAGCTACGAAAGTTTTACTCAAAGGCATCTTCCGGCCTAAAATCATGAAGCAGCTCTTGATTGATGAACCATATATAATGCTAATGGCAATGCTGTCACCTGGAATTTTACTAGCAATGTATAACAATGGTTCTTTTGAGATTGCTGTTAAGCTCTGGATAAATGAGAAACAATCGCTAGCCATGATAGCTACTATGTTGTCGTCACTTGCAACTAAAGTTTCAGTCTCAGAAACTTTATTGGCACAACGTATAATCATGGACACAGCAGCAAGTGATTTACTGGATGTCACATGTGATGGATTTAAAATGCATCTGACTTACATGACTGCAATCCAATTGCTTCAGCGCACCAAGGAAAAGGCACATAGTGATGAAGCTTTGTATACCAATGGGTTCTTAAATTGTGAGAGAGATGTACTTCACCTCATGGAAAAAAGTTATCTAGATCTCTTACACGAAGCGTGGCGCGACTTAACTTGGCGGGAAAAATTATCTGCAATTTGGCATTCGCAAAAAGCCAAGCGACTTATTGCTCAACCTTTGCGACCCATCGGAAAGGCAGATTTGAAGGGCTTGTACGACATATCACCAAGTGCATGTTTGGAAAAGAGTTTAAGAGCCTTCAAGAACGGAAAAGAGAACGTCAGTAGGAGTATTAGGTTGTATATACATAATAAAACGGTTAAAGTCACCTCCTTCTTTGTTAATAAAATTTTCCGTAATTTTCCATCTTTAGTTGTCTTTATTAATGTGTTTACAGTTGTTAGTTTATTAAGTAGCACAGTTTTAGTTTTGCAAAGTTTAATATTAGAGCATAAAATGTACAAGAGAAAAATTCAGCAAATCGAGATAGAGAGCAACGAAAAAGTTTGTGTTGAGCTTTATTCTTCACTTCAAGCCAAACTTAAAAGAGAATTTACTTGGGAAGAATACATTGAGTATCTGGAGACAGTAAACCCGAGCATCGTCGAATTCGCCAAGAAGCAGATGGAACAATACTCTGTCAAACATCAGAAGAGCACACCAGGAGTTAAAAACCTAGAACAGGTAATTGCATTCGTGACGTTAATAACAATGCTCTTTGACTCCGAAAGAAGCGACTGTGTGTTCAAAATGTTAAACAAGCTGAAAGGTATTGTCTCAACGTTAGATTGCGAAGTTCGGCATCAATCTTTAGATGATTATATGGAGAATTTTGATAATCGCAATCAAACAGTCGACTTTGAGCTAGATGACGACATAACGCGAGGCAGCCATGCACAAGACACAAAATTCACAGACTGGTGGGATCGTCAAATCCAAATGGGGTACACAATACCACATTACAGAACAGAAGGACACTTCATGGAAATCACCAGAGCGAAAGCAGTTCAAGTAGCAAGTGATATTGCTCAAAGCGCACATCTCGATTTCTTGATTCGTGGCGCGGTTGGATCTGGCAAGTCAACTGGCTTACCAGTTCATTTGAGCTCATCTGGCTCCGTTCTGCTAATTGAACCAACAAGACCCTTAGCTGAAAACGTCTTTAAGCAATTATCCAGTGGTCCTTTCTTCCAAAAACCAACGATGCGAATGCGTGGAAACAGTGTCTTTGGCTCGTCACCAATTTCAATCATGACGAGTGGATTTGCTTTGCATTATTTCGCAAATAATCGAAGCCAACTCACAAACTTCACTTATATAATTTTTGATGAATGCCATGTGATGGACGCTTCTGCAATGGCTTTTAGAAGCTTAGTCAGTGTCTTTCACAAGAGTTGCAAAGTGTTGAAAGTTTCCGCCACACCACCAGGAAGAGAAGTTGAATTCACTACACAATTCCCTGTTAAACTTGTCGTTGAGGACTCTCTTTCTTTTAAGTCATTCACAGACGCTCAAGGGACAAAAAGCAATGCAGACGTCATTCAACATGGCCACAACATTTTAGTCTATGTTTCAAGTTACAATGAAGTTGACAGCTTATCAAAGCTGTTGACGGAAAAAGGCATGATGGTGACAAAAGTCGATGGTAGAACTATGAAGCATGGAAGCCTTGAAATTATCACAAAAGGGACGGCAAGTAAGCCACATTTCGTTGTAGCCACAAACATAATCGAGAATGGAGTGACGCTTGACATAGATGTTGTGGTTGACTTCGGGCTTAAAGTGTCACCGTTCCTAGACGTGGATTCACGTAACGTCTCATACAATAAAGTGAACGTCAGCTACGGAGAGCGAATTCAAAGACTTGGGCGAGTTGGAAGGTTTAAACCTGGTGTAGCTTTACGCATTGGACACACTGAAAAAGGTCTTATTGAGACTCCGAGCATGATAGCAACAGAGGCTGCGTTAGCTTGTTTCGCATACAACTTACCAGTAATGGCTAGTAATGTCACGACAAGTATAATCGCAAACTGCACGGTTCGGCAAGTTAAAACGATGAATCAGTTTGAGCTCAGTCCATTCTTCACAACAAACTTCGTTTTCTACGACGGCACGATGCACCCAGCAATCCATGAAGCTCTGAAGAAATACAAGCTTCGAGAATCAATCACACCGTTGTGTGAGCAATCAATCCCATATAGGGCTTCAAGCGCTTGGATGTCAGCTTATGAGTATGAAAGAATTGGTGTATCTTTTGATCTTCCCCAGGCAATGAAGATTGCGTTTCACATCAAAGATATACCAGAGGGACTACACGAAAATCTTTGGAATATTGTGCTCAAGTTTAAAGATGTGTCAATCTTTCCAAGCATC-AGATCATCATCTATTAGCAAGATTGCGTATACGCTGAACACTGATCTTTTTGCAATTCCTCGAACTCTAATTTTAGTGGACAGATTGATAGAAGAGGAGCGCGTGAAGCAAAATCAGTTCAGAAGCTACATCGATGAGGGTTGCAACAGCATGTTTTCAATTGTTAATCTCACCAACACACTGCGTTCTAAATATGCAAAAGATTATACAGCTGAGAACATTAAGAAGCTTGAAATGGTTAAGAGTCAACTGAAAGAATTTTCTAATCTCAATGGATCAGTCGACGAAGAGAACTTAATCTCAAAGTATGAATCATTACAATTTGTTGTCCATCAGTCCAAAGATTCCTTAGCAAAAAGTTTGAATTTGAAGGGAATTTGGTGTAAATCTCTTATGGTCAAGGATGCATTAATAGCAGGAGCGGTGTCGATTGGAGGAGTGTGCATGATTTATCATTGGTTTACACAATCATTTCAGAGTGTATCACATCAAGGGAAGAATAAATCGAAGAGAATTCAAGCTCTCAAGTTCAAACGGGCGCGAGACAAGCGAGCAGGTTTTGAGATTGACAACAATGATGATACAATCGAGGAGTTCTTTGGATCTGCGTACAGAAAGAAAGGAAAGAATCCAGGAAACACAGTTGGAATGGGCAAATCAAACAGGCGTTTCATCAACATGTATGGGTTCGAACCAGGTGAATTTTCTTACATTCAGTTTGTGGACCCCTTAACTGGAGCACAAATTGAAGAGAATGTTTATGCCGACATCGTTGATATTCAGGAGAGATTTGGTGAAATCAGAAGAAAAATGATTGAGGGAGACGAATTGGACGCTCAATCAACGTATGCGCACACAACAGTTCACGCATACTTGAGAAAGGATTGGTCAGACAAAGCACTAAAAGTTGACCTAATGCCACATAACCCTCTCAAAATTTGCGATAAAACGAATGGTATTGCAAAATTTCCAGAACGCGAAGGAGAGTTGAGGCAAACTGGAGTGGCAGTCGAAGTAGATGTGAGTGAAATTCCAACAATCCCTGTCGAACATGAATCAAAGTCATTGATGAAAGGGTTGCGTGACTACAATCCTATTGCGCAAGCAATCTGCAAACTCAAAGTGACATCTGAATTTGGGACATCTGAGATGTATGGTATTGGTTTTGGTGCATATATCATTTCCAATCATCATTTGTTCAAAAGTTTTAACGGGACGTTGGAAATTCGGTCTCACCATGGCACATTAAAAGTGAATAACATGATGACTTTGCAAGTGAAACCAATCACTGGCAGGGATATAATCATAACGAAGATGCCAAAGGATTTTCCGGTCTTCCCCCAAAGACTTCACTTTCGATCTCCTAAAAACAATGAAAAGATGTGTATTGTGGGGTCAAATTTTCAAGAGAAATCAACTTCATCCACAATAACGGAAACGAGCGCCACATATATGGTTCCTAGGAGTTCTTTTTGGAAACATTGGATTGCAACGGATGATGGCCATTGTGGATTACCTGTCGTTAGTACAATTGATGGCAAGATAATTGGCATTCACAGTTTAGCCAACAATTCCAGTAGCGAGAACTACTATGCAGCATTTGACGACGACTTTGAGGATAAGTTTCTTCGAACTTCTGAGCATGTAGATTGGGTCAAGAATTGGAGATACAACCCAGATACTGTCGTGTGGGGACCCTTAAAATTGACTGAGAGCACACCAAAAGGACTGTTCAAGCCGACGAAGATTCTTGAGGATTTATT------TGAACACAATTTCGTTCGTGAGCAGTCAAAGAATTCGAACTGGATGTATCAAGCCCTTAGAGATAACTTGCAGGCAGTTGCACATATGAAAAGTCAGTTAGTTACAAAGCACGTTGTCAAGGGCGAGTGCAGATACTTTCAAGAGTTTTTAACAGTTGACAAGGAAGCTTCAAAC------TATTTTAGGCCGCTAATGGATGCATATGGCAAAAGTTTGTTGAATCAGGAAGCATATGTTAAGGACATTATGAAGTATGCTGAACCTATTGAGATTGGCAGAGTAGATTGCGAT--GCCTTTGAGGAAGCCACACATCGAGTTATTCTTTATTTGCAG-ATGAAAGGTTTTCGGACATGTTCTTATGTGACAGATGAGCAAGCAATATTCAAGGCACTAAACATGAAAGCAGCAGTAGGTGCGATGTATGGAGGAAAGAAAAAGGAGTACTTCCAGGACTTTACGGATAAAGACAAGGAGGACATCGTCATGCAGAGTTGTTTGCGGTTGTACAAAGGGGAATTGGGAATTTGGAATGGATCACTGAAAGCGGAGCTGCGTTGTAAAGAGAAAATTATGGCAAATAAAACACGCACCTTCACAGCAGCTCCTCTTGACACGCTTCTTGGTGGAAAGGTTTGTGTTGACGATTTCAACAATCAATTTTATTCGAAGAACATTGAATGTTGTTGGACAGTCGGAATGACCAAATTTTATGGAGGATGGAATAGATTGCTCAGAAGTCTGCCTGACAACT---GGATATACTGTGACGCGGATGGATCCCGATTTGACAGCTCATTAACTCCATACCTCATAAATGCAGTCTTGGCAATTCGAGCAACTTACATGGAGGATTGGGATATTGGATATCAAATGTTGCAGAACTTGTACACAGAAATTGTGTATACCCCAATCTCAACACCAGATGGAACAGTTGTCAAGAAATTCAGAGGCAACAACAGCGGACAACCATCCACAGTTGTTGACAATTCCTTGATGGTTGTGCTTGCAATGCATTATGCATTTGTGAAAGAATGCATCGATTTTGAGGAAATAGATGAATGTTGCAAGTTCTTTGTCAACGGAGATGATTTGTTGATAGCTGTCAATCCAGAGAAGGAAGACATGCTTGATAGATTTTCAGACCACTTCTCATCCTTAGGCTTAAACTATGATTTCTCATCCAGGACAAAACACAAAGAAGAATTATGGTTTATGTCTCATAGAGGTCTTGAAATTGAAGGCATGTACATTCCAAAATTGGAAGAGGAACGTGTGGTGTCTATCTTGCAATGGGACAGAGCAGAACAACCTGAACACCGACTAGAAGCTATATGTGCAGCAATGATTGAAGCGTGGGGCTATCCTGACTTAATCCATCAAATTCGGAGATTTTACTCGTGGCTGCTTGAAAAACAACCATTTGCAGTGCTTGCAGAGGAAGGAAAAGCTCCCTACATTGCCAATATGGCATTGAGAAAGCTGTATCTTGATAGAACAGTTGATAGCAGTGAACTTCATGAGTTCAGGAAGCTATTT-GTTGAATTGGATGATGAGTTTGAATGTGGGACGTACGAAGTGCATCATCAAGGAGAC---AATTTAGATGCAGGGAAGGAAAAGAAAGATGAGAAGAAAGATGATAAGAATGAGCAGGTTGCATCTACAGCAAGCAAGGAAATCGGTAAA---------------------------TCAAAGGATGTCAATGCCGGCACTTCAGGAACACACACAGTACCCCGAATTAAAAGCATAACACTCAAAATGCGAATGCCAAAAACCAAGGGTGCTGTCGCTTTAAATTTGGCCCACCTACTCGAGTATACTCCACAGCAAGTTGATATCTCAAATACTCGGGCCACTCAATCACAATTTGATACTTGGTATGCAGCAGTTCAACAAGCATACGACATCAGCGAAAGTGAGATGCCAACAGTGATGAACGGACTTATGGTTTGGTGCATTGAAAATGGAACCTCGCCAAACATTAATGGGACTTGGGTGATGATGGAAGGAAGTGAACAAGTTGAGTTTCCACTCAAGCCTGTTATAGAGAATGCAAAACCTACATTCAGGCAAATCATGGCACATTTTTCTGATGTTGCAGAAGCGTATATCGAAATGCGCAATAAAAAGGAACCATACATGCCACGGTATGGTTTAGTTCGAAATTTACGAGATATGAGTTTAGCTCGATACGCTTTCGATTTCTATGAACTCACATCTCAAACATCAGTTCGGGCACGAGAAGCGCACATACAAATGAAAGCAGCAGCTTTAAAATCAGCGCAAACTCGTATGTTCGGACTAGATGGTGGCATTGGTACAAAAGAGGAAAACACAGAAAGACACACCACCGAGGATGTTAACCCCAACATGCATACTTTGCTTGGGGTTCGTAACATGTGATCAT-GTGTCTACTGGGATGAAATATAACTATATATCGTATGCAATATATATTTTGGCTTTTCCTGTACTACTTTTATTACGTCTTTACAGT--ATTTCATGTTTCAAGCAATAGGAAGTGACTTTGTGATTTCGTCATAAA-GGTGGTTTCTATTTCTTCTTGTATCTGTTT--------------------------------------------------------------------------------------------------------------------------------------------------------------------------------------------------------------------------------------TAGATTATATAAAAGTTCCGGGTTGTTTTCGA-------------------------------------------------------------------------GAGTGATGTTATGATTTCGTCATAACAGTGATTGCAGATCTCAATCAGGAGCC
	Chile3       AAATTAAAACAACTCAATACAACATAAGAAAAACAACGTAAAA-CACTCTCAAGCTTTT?--ATTTGCATTCAAGCAACCTGCTAAATCTAAGCATTCATTGTCTTTTGCAACTTTTCTTTAACAGCATTATAATCATCCTG?TTTTAACAAGCAATTTCAT-TTCTTTTAATCATCGATTCACTCGCAATGGCTACTTGCATGTCAACAGTCTTTTTCGGTTCATTTGAGTGCAAACTACCGTACTCACCTGCCCCTCACGGGCTTGTTGCAAAGAGGCAGGAGATATCAACT-------------------------------------------------------------------------------------------------------------------------------------------------------------------------------------------------------------------------------------------------------------------------------------------------------------------------------------------------------------------------------------------------------------------------------------------------------------------------------------------------------------------------------------------------------------------------------------------------------------------------------------------------------------------------------------------------------------------CCCGTCGATCCTTTTGCAAATCTGGAAGCACAGCTTAGCGCAAGATTGCGCAGGCAAGAGCACGCAACCATTCGTGTGCTTAAGAATGGTACTAGCGTGTACCGATACAAGAACGATGCTCAAATTGCGCGTATCCAGAAGAAACGCGAGAAGAAAGAAAGGGATGAGCGCAACTTCCAAATGGCTGCGCCAAGCATTGTATCAACGATTTCTATTGCTGGTGGAAATCTTCCATCGAAATCTGAGCCACAAGCGCCGAAAGGCATAATCCACACAACTCCAAGGGTGCGCAAGATCAAGACGCACTCCGTACCAAAGCTGACGGAAAGTCAAATCAACCACCTGATCAAACAGGTGAAGCGAATTATGTCGGCAAAGAATGGATCTGTCCATTTGATTAACAAAAAGAGCACGCATGTCCAGTACAAGAAAGTACTCGGGGCAACTCGCGCGGTGGTTCACACTGCG?CATATGGTGGGCTTGCGGAAAAGGGTGGATTTCCGATGCGATATGTGGACAACCAAGTGCTTGCAATGTCTCGCTCGGACAGATAAATGGTCCAACCAAGTTCGCACCGTTGATATACGGAAGGGTGATAGCGGAACTGTGTTTAGTGCTAGCAGCCTCAAAGGTCACTTTGGACGGAGTTCAGGAGGCTTGTTTATAGTACGTGGATTACATGAAGGAAAGCTATACGATGCGCGGTCTAAAGTCACTCAAAGTGTTTTAAATTCGATGATCCAGTTTTCCCACGCTGAAAGGTTTTGGAAAGGATTGGATGGCAACTGGGCACAGATGAGATATCCTGCAGACCACACATGCGAACCTGATTTATCGGTTGAGGACTGTGGTAAAGTTGCTGCAATAGTGACACATAGTATTCTACCGTGCTATAAGATGACTTGTAGTACCTGTGCCCAACAATATGCCAGCTTGCCAGCCAGTGACTTGTTTAAGTTATTACACAGGCATGTAAGAGATGGTCTGAATCGGCTGGAAATGGATAAAGACCGATTCATTCATGTTATCAGATTTTTGACAATGCTAGAACACTTAACTGAACCAGTTGACTTGAATCTCGAGATATTCAATGAAATATTTAAGTCTATAGGGGAAAAGCAGCAAGCACCGTTCAAGAACCTGAATGTCTTGAACAATTTCTTTTTAAAAGGAAAAGAAAACACAGCCCATGATTGGCAGTCGGCTCAGTTAAGCTTGCTCGAATTGGCAAGATTCCAAAAGAATAGAACTGACAACATTAAGAAAGGGGATATATCATTCTTCAGGAACAAGTTATCCGCCAAAGCAAACTGGAATTTGTATTTGTCGTGTGACAATCAATTGGATAAAAATGCGAATTTCTTATGGGGCCAAAGGGAATACCATGCAAAGAGATTTTTCTCAAACTTCTTTGAGGAAATTGATCCAGCGAAAGGGTACTCAGCATATGAAATCCGCAAGCATCCAAATGGTATAAGGAAGCTTTCAATCGGTAACTTGATCGTTCCACTTGATTTGGCTGAGTTCAGACAGAAGATGAAAGGAGACTATAGGAAACAGCCAAAAGTCAGTAAAAAGTGCACGAGTTCAAAGGATGGAAACTACGTGTATCCTTGCTGTTGCACAACACTTGATGATGGCTCAGCTGTTGAATCAACGTTCTATCCACCAACCAAAAAGCATCTTGTGATAGGTAATAGTGGTGATCAAAAATATGTTGATTTACCTAAAGGAAATTCAGAAATGTTATACATTGCTAAGCAGGGTTATTGTTACATTAACGTGTTCTTAGCAATGTTAATCAACATTAGTGAGGAGGATGCAAAGGACTTCACAAAGAGGGTCCGAGACATGTGTGTGCCTAAGCTTGGGACTTGGCCAACTATGATGGATTTGGCAACCACTTGTGCTCAATTGAAAATATTCTATCCTGATGTACATGACGCAGAGCTGCCAAGAATTCTGGTTGACCATGAGACCCAAACGTGTCATGTGGTTGACTCATTTGGCTCGCAGACAACCGGATACCATATTCTTAAAGCGTCAAGCGTATCCCAGCTTATTTTATTTGCAAATGATGAGTTGGAATCTGACATTAAGCATTATAGAGTTGGTGGTATTCCAAGTGCATGTCCTGAACTCGGGTCCACAAG-ATCACCTTTTAGGGAAGGAGGAGTCATAATGTCTGAGTCAGAGGCGTTAAAATTGCTTTTGAAAGGAATTTTCAGACCCAAGGTGATGAGACAACTACTGTTGGATGAGCCTTATCTGCTAGTTCTATCAATACTTTCTCCTGGTATACTTATGGCTATGTACAATAATGGAATTTTTGAGCTTGCAGTGAAACTGTGGATTAATGAAAAACAATCCATAGCCATGATAGCATCATTGTTGTCAGCTTTAGCTTTGCGGGTATCAGCAGCAGAAACACTTGTCGCGCAGAGAATCATAATGGACGCAGCAGCAACAGACCTCCTTGATGCCACGTGTGATGGGTTCAATTTGTACTTAACGTACCCCACTGCACTCCTGATTTTAGAGGTTGTCAAGAATAGAAATGAGTGTGATGATACTCTGTTCAAGGCGGGTTTTCTAA???ACAGTGCAAGCGTCGTACAGATTATGGAAAAAAATTATCTAAATCTCTTACACGATGCTTGGAAAGATTTAACTTGGCTAGAAAAATTATCCGCAACATGGTACTCATACAAGGCAAAACGCTCTATCACTCGGTTTATAAAACCCACAGGCAAAGCAGATTTGAAAGGGTTGTACAACATATCACCACAAGCGTTTTTGGGTCGCGGTGTTCAGAAGGTGAGAGGCACGGCTTCAGGCTTGGGCGAACAACTCAATAATTACTTCAATGTTAAGTGTGTAAATATTTCATCTTTCTTTATACGTAGAATTTTTCGGCGCTTGCCAAATTTTGTTACTTTTGTTAATTCATTATTAGTTATTAGCATGCTAACTAGCGTAGTGGCAGTATGCCAAACAATAATTTTAGATCAGAGAAAGTATAAGAAGGAGATTGAGTTGATGCAGATTGAGAAGAATGAGGTGGCCTGTGTTGAGTTATATGCGAGCTTGCAGCGCAAACTTGAACGTGAATTCACATGGGACGAGTATATAGAGTACTTGAAATCAGTGAATCCTCAGATAGTTCAGTTCGCAAAAGCACAGATGGATGACTATGACGTGCGGCACCAACGTTCCACACCAGGCGTCAAAAATCTAGAGCAGATAGTGGCATTTTTAACTTTAGTTATAATGGTGTTTGATGCTGAGAGAAGCGACTGCGTATTCAAAACTTTAAATAAGTTCAAGGGCGTCATTTCCTCTCTGGACCATGAAGTGAGACATCAGTCTTTAGATGATGTGATTAAGAACTTTGACGAGAGAAATGAAACCATTGACTTTGAATTGAGTGAGGATACGATTAGAACATCGTCAGTGTTAGATACAAAATTCAGTGACTGGTGGGATCGTCAAATTCAAATGGGACACACGATTCCACACTATAGAACTGAAGGGCAATTCTTGGAATTCACAAGAGCAACTGCTGTCCAAGTGGCCAATGATATCGCTCACAGTGAGCATCTAGATTTCCTGGTGAGAGGAGCTGTTGGATCGGGAAAATCTACTGGGCTACCTGTTCATCTTAGTGTGGCTGGATCCGTACTTTTGATTGAACCAACACGGCCACTAGCAGAGAATGTGTTCAAGCAGCTATCTAGTGAACCATTTTTCAAGAAGCCAACACTGCGTATGCGTGGAAATAGTGTGTTTGGGTCTTCTCCAATCTCTGTTATGACTAGCGGATTTGCATTACATTACTTTGCTAACAACCGGCTTCAATTAACTCAGTTCGACTTTATCATATTTGATGAAAGTCATGTTCTAGACGCTTCTGCAAAGGCATTTCGTAGTTTGTTGAGGGTTTACCATCGAACATGCAAAGTGCTAAAAGTGTCTGCTACTCCAGTGGGAAGGGAAGTCGAATTCACAACACAGCAACCAGTCAAGCTAATAGTGGAAGAAACACTTTCTTTCCAATCTTTTGTTGATGCACAAGGTTCTAAAACCAATGCTGACGTTGTACAATTTGGATCTAACGTACTCGTGTACGTATCGAGCTATAATGAAGTCGACACTCTTGCCAAGCTCTTAACAGATAAAAACTTCATGGTTACAAAAGTTGATGGTAGGACCATGAAACATGGTTGCCTGGAGATTGTCACAAAGGGAACTAGTGCAAGACCACATTTTGTTGTGGCAACCAACATAATTGAGAATGGGGTAACTCTAGACATAGATGTGGTTGTGGACTTTGGACTCAAAGTGTCACCATTCTTAGATGTTGATAATAGGAGCATAGCTTACAATAAAGTTAGTGTTAGTTATGGTGAAAGAATTCAGAGATTGGGTCGCGTCGGACGCTTTAAGAAAGGAGTAGCGCTACGCATTGGACACACAGAAAAGGGGATTCTTGAGATTCCGAGCATGATTGCTAGTGAAGCTGCTCTTGCCTGTTTCGCTTACAATTTGCCAGTGATGACAGGAGGTGTTTCAACTAGCCTCATTGGCAATTGTACTGTGCGCCAGGTTAAAACAATGCAACAATTTGAATTGAATCCGTTCTTCATCCAAAATTTTGTTGCACATGATGGATCAATGCATCCTGTCATACATGACATTCTCAAGAAGTACAAGCTCCGAGATTGTATGACACCTCTGTGTGATCAGTCTGTACCATATAGGGCTTCAAGCACTTGGTTAACAGTCAGGGATTATGAACGACTTGGAATAGTTTTAGACATTCCGAGTCAAGTCAAGATTGCATTCCATGTCAAAGACATCCCTCCTAAGCTTCATGAAATGCTTTGGGAAACGGTTGTTAAATATAAAGATGTGTGCCTGTTCCCAAGTATC-CGAGCATCATCAATCAGTAAGATTTCATATACACTGCGCACCGACCTTTTCGCCATTCCAAGAACTCTGATATTGGTAGAAAGGCTACTTGAAGAGGAGCGAGTCAAACAAAGTCAGTTCAGGAGTCTTATTGATGAAGGATGTTCAAGTATGTTCTCAATTGTCAACTTGACCAACACTCTTAGAGCTAGATATGCAAAGGATTATACTGCGGAGAACATACAAAAGCTTGAGAAGGTGAGAAGCCAGCTGAAAGAGTTCTCAAACTTGGATGGATCAGCGTGTGAGGAAAATCTGATAAAGAGGTATGAATCTTTACAGTTTGTACACCACCAATCCACAACATCGCTTGCAAAGGACCTCAAATTGAAGGGAGTTTGGAAGAAGTCATTAGTGGTGAAAGACTTGATCATAGCAGGTGCCATTGCAATCGGCGGAGTGGGACTCATATACAGTTGGTTCACACAATCAATTGATACTGTGACTCATCAGGGCAAGAACAAATCCAAGAGAATACAAGCTTTGAAGTTTCGCCATGCCCGTGACAAAAGAGCTGGCTTTCAGATTGACAACAATGAGGACACAATAGAGGAGTACTTTGGATCCGCATACACGAAGAAAGGAAAGGGTAAAGGCACTACGGTCGGTATGGGCAAGGCAAGCAGGAGATTTGTCAACATGTATGGGTTTGATCCTACAGAGTACTCATTCATCCAGTTTGTTGATCCACTCACTGGGGCGCAAATAGAGGAAAATGTCTATGCTGATATTAGAGACATTCAAGAGAGGCTTGGTGAAGTTCGAAGTAAAATGGTTATAGACGATGAAATAGATCCAGCGACCCTGAGAGGCAACACAACCATACATGCTTATTTTAGAAAAGACTGGTCTGACAAAGCTTTGAAGGTTGATTTGATGCCACATAATCCACTCAAGGTTTGTGACAAAACGAACGGCATCGCCAAATTTCCTGAGAGGGAATTTGAACTAAGGCAAACTGGTCCAGCTGTAGAGGTTGATGTTAAAGATATTCCAAAACAGGAAGTAGAGCATGAAGGCAAGTCGCTCATGCGAGGCTTACGAGACTTCAATCCAGTCGCTCAAACAGTCTGTAAGCTAAAAGTATCGGTTGAATGTGGGACATCAGAAATGTATGGTTTTGGGTTTGGAGCTTATATAATTACAAACCATCATTTGTTCAAGAGCTATAATGGTTCCATGGAGGTGCGTTCAATGCACGGCACATTTAGGGTGAAAAATCTGCACAGCCTGAGTGTTCTACCGATTAAAGGTAGGGACATCATCCTCATTAAGATGCCAAAGGATTTCCCTGTTTTTCCACAGAAATTGCACTTCAGAGCTCCCATACAGAATGAAAGAATTTGCCTTATCGGCACCAACTTTCAGGAAAAGTATGCGTCGTCAACTGTCACAGAAGTGAGTACTACTTACAATGTGCCAGGCAGCACATTCTGGAAACATTGGATCGAGACAGACGATGGACATTGTGGGTTACCAGTGGTGAGCACTGCTGATGGATGCTTAGTTGGAATACACAGTTTGGCAAACAATGCACACACCACGAATTACTACTCAGCCTTTGATGGAGAGTTCGAGAGCAAATACCTTCGAACTGATGAGCATACTGAGTGGATTAAGTCTTGGGTTTATAATCCAGACACGGTGCTGTGGGGTCCATTGAAGCTTAAAGAAAGCACTCCTAAGGGGTTGTTCAAAACAACAAAGCTTGTGCAGGATTTGAT------TGATCATGATGTGGTTGTGGAGCAGGCTAAGCACTCTGCGTGGATGTATGAAGCCCTGACAGGGAATCTGCAAGCCGTGGCAGCGATGAAGAGCCAATTAGTTACTAAACATGTGGTTAAAGGGGGGTGTCGGCACTTCAAAGAGTTTTTGACTGTGGATGCGGAAGCAGAGGCA------TTCTTTAGACCTTTAATGGATGCCTATGGGAAGAGCTTGCTGAATAGAGATGCGTACATCAAGGACATAATGAAGTATTCAAAAACCATAGATGTTGGGATTGTAGACTGTGAT--GCATTTGAAGAGGCCGTCAATAGAGTGATCATCTATTTGCAA-GTACATGGTTTTAAAAAGTGTGCATATGTTACTGACGAGCAAGAGATCTTCAAAGCACTCAACATGGAAGCTGCGGTTGGAGCCATGTATGGTGGTAAGAAGAAGGACTATTTCGAGCACTTCACAGATGCAGACAAAGAAGAAATAGTCAAGCAGAGCTGTCTGCGGTTATACAAAGGCCAACTTGGCATCTGGAACGGGTCGTTGAAGGCAGAACTTCGATGTAAGGAGAAGATACTTGCAAATAAAACAAGGACATTCACCGCTGCACCACTAGACACTCTACTGGGTGGTAAAGTGTGTGTCGACGACTTCAATAATCAATTCTACTCAAAGAACATTGAATGTTGTTGGACAGTTGGAATGACCAAGTTTTATGGTGGTTGGGACAAATTGCTTCGGCGTCTGCCTGAAAATT---GGGTTTACTGCGACGCTGATGGCTCACAATTTGATAGCTCACTCACCCCATATTTGATCAATGCTGTTCTCATTATCAGAAGCACATATATGGAAGATTGGGACGTGGGATTTCAGATGCTGCGTAATCTCTACACAGAGATCATTTACACACCCATCTCAACTCCAGATGGAACAATTGTTAAGAAGTTTAGAGGAAATAATAGTGGTCAGCCTTCTACTGTTGTGGATAACTCTCTTATGGTCGTTCTTGCCATGCACTACGCTCTCATCAAGGAATGTGTCGAGTTTGAAGAAATTGACAACACGTGCATGTTCTTTGTCAATGGAGATGACTTACTAATTGCTGTGAACCCAGAGAAAGAGAATATTCTTGACAGAATGTCACAACACTTCTCAGATCTTGGTTTAAATTATGATTTCTCATCAAGAACGAGAAATAAGGAAGAGTTGTGGTTCATGTCCCATAGAGGCTTATTGATTGAGGGCATGTATGTGCCGAAGCTTGAAGAAGAGAGGATTGTGTCCATTTTACAATGGGATAGAGCAGATTTACCTGAGCACAGACTAGAGGCAATCTGCGCAGCCATGATTGAGCCCTGGGGATACTCTGAATTAACACACCAGATCAGGAGATTCTACTCATGGTTGTTACAACAGCAACCCTTCGCAACAATTGCACAAGAAGGAAAAGCTCCTTACATAGCAAGTATGGCGTTGAAGAAACTGTACATGGATCGCGCAGTTGATGAAGAGGAGCTAAGGGCTTTCACTGAAATGATG?GTGGCATTGGACGATGAATTTGGATGTGATTCTTATGAAGTGCATCATCAAGCAAAT---------GATACAATTGATGCAGGAGGGAGCAGCAAGAAAGATGCAAAGCCAGAACAAGGTAGCATCCAGCCAAATCCTAACAAGGGAAAG---------------------------GACAAGGACGTGAATGTTGGTACATCTGGAACACATACAGTGCCGAGAATAAAAGCTATCACGTCCAAAATGAGAATGCCCACAAGTAAAGGAGCAACCGTATTGAATTTAGAACATTTGCTCGAGTATGCCCCACAGCAGATTGATATCTCAAATACTCGAGCAACTCAATCACAGTTTGATACATGGTATGAAGCAGTGCGGGTTGCATACGACATAGGGGAATCTGAAATGCCAACTGTGATGAATGGGCTTATGGTTTGGTGCATTGAAAATGGAACCTCGCCAAATATCAACGGAGTTTGGGTTATGATGGATGGGAACGAACAAGTTGAATACCCGTTGAAACCAATCGTTGAGAATGCAAAGCCAACCCTTAGGCAGATCATGGCACATTTCTCAGATGTTGCAGAAGCGTATATAGAAATGCGCAACAAAAAGGAACCATATATGCCACGATATGGTTTAATTCGCAATCTGCGAGATATAAGTTTGGCGCGTTATGCCTTCGATTTCTATGAAGTCACATCCCGAACACCAGTGAGGGCCAGGGAAGCGCATATCCAAATGAAAGCCGCAGCATTGAAGTCAGCTCAACCTCGACTTTTCGGGTTGGACGGTGGCATCAGTACACAAGAGGAGAACACAGAGAGGCACACCACCGAGGATGTCTCTCCAAGTATGCATACTTTACTTGGAGTCAAAAACATGTGAT?GTAGTGTCTCTCCGGACGATATATAAGTATTTACA-TATGCAGTAAGTATTTTGGCTTTTCCTGTACTACTTTTATTGCAACTAGTTACTAGTTTGAACATAGTTAATACATAGAGGTGACAGGATGATTTCGTCATTGT-GGTGACTCTATGTGTTAGTCCTGCATTATG------------------------------------------------------------------------------------------------------------------------------------------------------TTTGAATATAGTTAATAAATAGAGGTGACAGGATGATATCGTCATTGTGGTGACTCTATTTGTTAATGTAGTATTGTCTAGTTTATATATAAAAGTGCCGGGTTGTTGTTGTTGTAGGTGATCTATCAACTAGGTGATGTTGCGATTTCGTCGTAGCAGTGACTATGTTTGGATTTATCTA-CTTGGGTGGTGTTATGATTCTGTCATAGCAGTGACTGTAAACTTCAATCAGGAGA?
	Adgen        AAATTAAAACAACTCAATACAACATAAGAAAAACAACGCAAAAACACTCACAAACGCTT---ATTCTCACTCAAGCAACTTGCTAAGTTTCAGCTTTAATCATTTTCTTGTAATTCTCTTTAACGATATTGAAAACCGTCTTAGTTCGTTAAGCAATTTCAT-CTTTTTCAACTACTAGCAGATTCTCCATGGCAACCTACATGTCAACAATCTGTTTCGGCTCGATTGAATGTAAATTACCGTACTCACCCGCCTTTTGCGGACGTGTCGCTGAGGAACGAGATGTGTTGACT-------------------------------------------------------------------------------------------------------------------------------------------------------------------------------------------------------------------------------------------------------------------------------------------------------------------------------------------------------------------------------------------------------------------------------------------------------------------------------------------------------------------------------------------------------------------------------------------------------------------------------------------------------------------------------------------------------------------TCCGTTGATCCTTTCACAAATCTGGAGGCACAGCTTAGTGCACGATTGCTCAGGCAAGAGCATGCAACTGTTCGTGTACTTAAGAATGGTACTTGTGCGTACCGATACAAGACTGATGCTCAGATAGTGCGCATTCAGAAGAGATTGGAGAGGAAAGAAAGAGATGAGCACCACTTTCAGATGGCTGCTCCAAGTGTTGTGTCAAAGATAACTATTGCCGGTGGGAGTCCTCCATCGAAGTCTGAGCCACAAACGCCGAAAGGAATCATCCACACAACTCCAAGGGTGCGTAAAGTCAAGAAACACTCCATGATAAAGTTGACGGAGAGCCAGATGAATCATCTTATTAAGCAGGTGAAGCAGATTATGTCGGCTAAGAGAGGGTCTGTCCTCCTAATTAATAAGAAGAATACGCAGGTTCAATATAAAGAGATACTTGGAGCAACTCGCGCGGCTGTTCGTACTGCA?CATATGATGGGTTTGCGACGAAGAGTGGATTTCCGGTGTGACATGTGGACAACTGAGTGTCTTAAAAGTCTCGCTCGAACAGATAAATGGTCCGACCAAGTTCGCACCATAAACGTGCGTAAGGGTGATAGTGGAGTCATCTTGAATGCCAATAAACTCAGAGGTCACTTTGGAAGAAGTTCGGGAGGCTTGTTCATAGTGTGTGGATCACATGAAGGGAAATTGTATGACGCACGTTCCAAAGTTACTCAGGGTGTTTTAAACTTGATGGTCCAGTTCTCGAATGCTGAGAATTTCTGGAAAGGTCTGGATGGCAACTGGGCACGATTGAGATACCCTTCGGATCATACATGTGTAGCTGGTTTACCAGTCGAGGATTGCGGTAGAGTTGCCGCATTGATGGCACACAGCATTCTGCCGTGCTACAAGATAACCTGCCCCACTTGTGCTCAACAATATGCCAATTTGCCAGCTAGCGATTTATTCAAGTTGTTGCATAAACATGCAAGGGATGGTTTAAGTCGATTGGGAGCGGACAAAGACCGATTCGTCCATGTCAATAAGTTCTTGGTAGCGTTGGAGCATTTAACTGAACCAGTTGATTTAAATCTCGAACTCTTCAATGAGATATTTAAATCCATAGGGGAGAAGCAGCAAGTACCGTTCAAGAACTTGAATGTCTTAAATAATTTCTTTCTGAAAGGAAAGGAGAATACAGCTCGTGAATGGCAGGTGGCTCAATTAAGTTTACTCGAATTGGCAAGGTTCCAGAAGAATAGAACTGATAACATTAAGAAAGGTGATATATCTTTCTTTAGAAATAAACTATCTGCCAAAGCAAACTGGAATCTGTATTTGTCGTGCGACAATCAGCTGGATAAAAATGCAAACTTTCTGTGGGGGCAAAGGGAGTACCATGCTAAGCGGTTTTTCTCAAACTTCTTTGAGGAAATTGATCCGGCAAAGGGATACTCAGCTTATGAAATCCGCAAGCATCCGAATGGAACAAGGAAGCTCTCAATTGGTAACTTAGTTGTTCCACTTGATTTAGCTGAGTTTAGGCAGAAGATGAAAGGTGATTATAGGAGACGACCAGGGGTCAGCAAAAAGTGCACGAGCTCGAAAGATGGTAACTATGTGTATCCCTGCTGCTGCACAACACTTGATGATGGTTCAGCCATCGAATCAACATTCTACCCGCCAACTAAGAAGCACCTTGTAATAGGCAATAGTGGTGACCAAAAATATGTTGATTTGCCAAAAGGGGATTCAGAGATGTTATACATCGCCAAGCAGGGTTATTGTTATATTAACGTGTTTCTTGCAATGCTGATTAACATTAGCGAGGAGGACGCAAAGGATTTCACAAAGAGAGTTCGCGACATGTGTGTGCCAAAGCTTGGAACCTGGCCAACCATGATGGATCTGGCGACTACTTGTGCTCAAATGAAAATATTCTATCCTGATGTGCATGACGCAGAACTGCCCAGAATATTGGTTGACCATGACACTCAAACGTGTCATGTAGTTGACTCATTTGGCTCGCAAACAACCGGGTATCATATTCTAAAAGCATCTAGCGTATCCCAACTTATTTTGTTTGCAAATGATGAGTTGGAATCTGATATAAAACATTATAGAGTTGGTGGCATTCCGAATGCATGCCCTGAACTTGGATCCACAAT-ATCACCTTTTAGAGAAGGAGGAGTTATAATGTCTGAGTCGGCAGCGCTAAAACTGCTTTTAAAGGGAATTTTTAGACCTAAGGTGATGAGACAGTTACTGCTGGATGAACCTTACCTATTAATTCTATCAATATTATCCCCTGGCATACTGATGGCTATGTATAATAATGGGATTTTTGAACTTGCGGTCCGGCTGTGGATCAATGAGAAACAATCCATAGCCATGATAGCATCGTTATTGTCAGCTTTGGCTCTACGAGTGTCAGCGGCAGAAACACTCGTTGCACAGAGGATCATAATTGATGCTGCAGCTACAGACCTCCTTGATGCTACGTGTGATGGGTTCAACCTACATCTAACGTACCCCACCGCACTGATGGTGTTGCAAGTTGTTAAGAATAGAAATGAGTGCGATGATACCCTATTCAAGGCGGGTTTTCCAAGTTATAGCACGAGCGTTGTACAGATTATGGAAAAAAATTATCTAGATCTCTTGGACGATGCTTGGAAAGATTTAACTTGGCGAGAAAAATTATCTGCAACATGGCATTCATACAGAGCAAAACGCTATATCACTCGGTTTATAAAACCCACAGGAAAAGCAGATTTGAAAGGGTTGTACAACATATCACCACAAGCATTCTTGGGTCAAAGCGTTCAGAGGGTCAAGGGCACTGCTTCAGGATTGAGCGATAGATTTAATAATTATTTCAATACTAAGTGTGTAAATATTTCATCCTTTTTCATTCGTAGAATCTTTAGGCGCTTGCCAACTTTTGTCACTTTTGTAAATTCATTATTAGTTATTAGTATGTTAACTAGTGTAGTGGCAGTGTGTCAGGCAATAATCTTGGATCAGAGGAAGTATAGGAGAGAGATTGAGTTGATGCAGATTGAGAAGAATGAAATTGTCTGTATGGAGTTATATGCAAGTTTACAGCGCAAACTTGAACGCGATTTCACATGGGATGAGTATATAGAATATTTAAAGTCAGTAAACCCTCAGATAGTTCAGTTTGCACAAGCACAGATGGAAGAATATGATGTGCGACATCAGCGCTCCACGCCAGGTGTCAAAAATTTGGAACAGGTGGTGGCATTTATGGCTTTAGTCATTATGGTGTTTGATGCCGAAAGGAGTGATTGTGTATTCAAAACTCTCAATAAGTTCAAGGGTGTCCTTTCCTCAATGGATCATGAAGTTAAACATCAGTCCTTGGATGATGTGATCAAGAATTTTGATGAGAGAAATGAGACTATAGATTTTGAATTGAGTGAAGACACAATCCGAACGTCATCAGTACTTGATACAAAGTTTAGTGATTGGTGGGATCGGCAAATTCAGATGGGGCATACGCTTCCACATTACAGAACCGAGGGGCATTTCATGGAATTTACAAGAGCAACTGCTGTCCAAGTGGCTAATGATATTGCCCATAGTGAACATCTGGACTTCTTGGTGAGGGGAGCTGTCGGATCTGGAAAGTCTACTGGGTTGCCTGTTCATCTTAGCGCGGCTGGATCTGTGCTTCTGATCGAACCAACGCGACCGCTAGCAGAGAATGTGTTCAAACAGTTATCTAGTGAACCATTCTTCAAGAAGCCAACACTGCGCATGCGTGGAAATAGTATATTTGGCTCATCTCCAATCTCTGTCATGACCAGTGGATTTGCATTACACTACTTTGCCAATAATCGCTCTCAACTAACTCAGTTCAACTTCATAATATTTGATGAGTGCCATGTTTTAGATCCCTCCGCAATGGCATTTCGTAGTCTACTGAGTGTCTATCACCAAACATGCAAAGTGTTAAAAGTGTCAGCTACTCCAGTGGGAAGGGAAGTTGAGTTCACTACACAGCAGCCAGTCAAACTGATAGTGGAAGACACACTGTCTTTCCAATCTTTTGTTGATGCGCAAGGCTCAAAAACCAATGCTGATGTTGTCCAGTTTGGCTCGAACGTACTTGTGTACGTGTCAAGCTATAATGAAGTTGATACCTTGGCCAAACTCCTGACAGACAAAAATATGATGGTCACAAAGGTTGATGGCAGAACAATGAAGCATGGTTGCCTAGAAATCGTCACAAAAGGAACCAGTGCAAGACCACACTTTGTTGTGGCAACCAACATAATTGAAAATGGAGTGACCTTGGACATAGATGTGGTTGTGGATTTTGGGCTCAAAGTGTCACCGTTTTTAGACATTGACAATAGGAGTATTGCTTACAATAAAGTTAGTGTTAGCTATGGTGAGAGAATTCAGAGGTTGGGTCGTGTTGGACGTTTCAAGAAAGGAGTAGCACTGCGCATTGGACACACTGAAAAGGGAATCATTGAAATTCCAAGTATGGTTGCTAGTGAAGCCGCTCTTGCTTGCTTTGCATACAACTTGCCAGTAATGACAGGAGGTGTCTCAACTAGTCTGATTGGCAATTGTACTGTGCGCCAGGTTAAAACGATGCAACAATTTGAATTGAATTCCTTCTTTATCCAGAACTTTGTTGCCCACGATGGATCAATGCATCCTGTCATACATGACATTCTCAAAAAATATAAACTTCGAGATTGTATGACACCCCTATGTGATCAGTCTATACCGTATAGGGCCTCAAGTACTTGGTTGTCAGTGAGTGAATATGAACGACTTGGAGTGGTCTTAAACATTCCAAAGCAAGTCAAAATTGCATTTCATGTTAAAGAAATCCCTCCTAAGCTTCACGAAATGCTGTGGGAAACGGTTGTCAGGTATAAAGACGTTTGTTTGTTTCCAAGCATT-CGAGCATCTTCTATCAGCAAAATCGCATACACATTGCGCACAGATCTCTTTGCCATTCCAAGAACCCTAATATTGGTGGAGAGGTTACTTGAAGAGGAGCGAGTGAAGCAGAGTCAATTCAGAAGTCTTATTGATGAAGGATGTTCAAGCATGTTCTCAATAGTCAACTTGACCAACACTCTTAGAGCTAGATATGCAAAAGACTACACCGCAGAGAACATACAAAAACTTGAGAAGGTGAAGAGTCAATTAAAAGAATTCTCAAATTTGGATGGCTCTGCATGTGAGGAAAATTTAATGAGGAGATATGAGTCTTTGCAGTTTGTCCATCATCAAGCTACGACGTCACTTGCAAAGGATCTTAAGTTGAAGGGGGTTTGGAAGAAGTCACTAGTGGCTAAAGACTTGATCATAGCAGGTGCCATTGCAGTTGGTGGAATAGGGCTCATCTATAGTTGGTTCACACAATCAGTTGAAACTGTGTCCCATCAGGGAAAGAATAAATCCAAAAGAATCCAGGCTTTGAAATTTCGCCATGCTCGCGACAAAAGGGCTGGCTTTGAAATTGATAACAATGATGACACAATAGAAGAATTCTTCGGATCTGCATACAGGAGAAAGGGAAAAGGTAAAGGCACCACAGTTGGCATGGGCAAGTCAAGTAGGAGGTTCATTAACATGTATGGATTCGATCCAACAGAGTACTCATTTATCCAATTCGTTGATCCACTCACTGGAGCACAAATAGAAGAGAATGTCTATGCTGACATTAGAGATATTCAAGAGAGATTTAGTGAAGTGCGAAAGAAAATGGTTGAGGATGATGAAATTGAAATGCAAGCCTTGGGTAGTAACACGAACATTCATGCCTACTTCAGGAAAGATTGGTCTGACAAAGCCTTAAAGATTGACTTAATGCCACATAACCCACTTAAAATTTGTGATAAAACAAACGGCATTGCCAAATTTCCTGAAAGAGAGTTTGAACTAAGGCAGACTGGGCCAGCTATAGAAGTCGATGTGAAGGACATTCCAAAACAGGAGGTGGAGCATGAAGCTAAATCGCTCATGAGAGGCTTGAGAGACTTCAACCCAATTGCCCAAACAGTTTGTAGGTTGAAAGTATCTGTTGAGTATGGAACATCAGAGATATATGGTCTTGGGTTTGGAGCTTACATAATAACAAATCACCATTTGTTCAAGAGCTACAATGGTTCAATGGAAGTGCGATCTATGCACGGCACGTTCAGGGTGAAAAATCTACACAGTTTGTGTGTTTTGCCAATTAAGGGTAGGGACATCATCCTCATCAAAATGCCAAAGGATTTCCCTGTTTTCCCACAGAAAGTACGCTTCCGAGCTCCAACACAAAATGAGAGAATTTGTCTAGTTGGAACAAATTTTCAGGAGAAATATGCATCTTCAATTATCACAGAAACAAGCACCACTTACAATGTACCAGGTAGCACTTTCTGGAAGCACTGGATTGAGACAGATGATGGACATTGTGGATTGCCAGTAGTGAGCACTGCTGACGGATGTTTGGTTGGAATACATAGTTTGGCGAATAATGTGCAGACCACGAACTACTATTCAGCCTTTGATGAAGATTTTGAGAGCAAATACCTCCGAACTAATGAGCACAATGAATGGATCAAATCATGGGTTTATAATCCAGACACAGTGCTGTGGGGCCCGCTGAAACTTAAGAAAAGCACTCCTAAAGGGTTGTTTAAGACAACTAAGCTTGTGCAGGATCTAAT------CGATCATGATATGGTTGTGGAGCAGGCTAAGCACTCTGCATGGATGTATGAAGCTCTGACAGGAAATTTGCAAGCTGTAGCAACAATGAAGAGTCAATTGGTGACCAAGCATGTGGTTAAAGGAGAGTGTCGACACTTCAAAGAGTTTCTAACTGTGGATGCGGAGGCAGAAGCA------TTCTTCAGGCCTTTGATGGATGCATATGGGAAAAGCTTGTTAAACAGAGATGCATACATTAAAGATATAATGAAGTATTCAAAGCCCATAGATGTTGGAATTGTAGATTGTGAT--GCATTTGAAGAAGCTATTAATAGAGTTATCATTTATTTGCAA-ATGCACGGTTTCCAGAAGTGCGCATATGTCACCGATGAGCAAGAGATTTTCAAAGCTCTCAATATGAAAGCTGCTGTTGGAGCTATGTATGGTGGCAAGAAGAAGGATTATTTCGAACATTTCACTGATGCAGACAAGGAAGAGATTGTTATGCAAAGCTGTCTGCGATTGTATAAAGGCTTACTTGGCATTTGGAATGGATCATTGAAGGCAGAGCTTCGGTGTAAGGAAAAGATACTTGCAAATAAAACGAGGACATTCACCGCTGCGCCACTAGACACTTTACTGGGTGGTAAAGTGTGCGTTGACGACTTCAATAATCAATTTTACTCAAAGAATATTGAATGCTGTTGGACAGTTGGGATGACCAAGTTTTATGGTGGTTGGGACAAACTGCTTCGGCGTTTACCTGATAAATCGGGGGTGTACTGCGATGCTGACGGCTCACAATTCGATAGTTCACTCACTCCATATTTAATCAATGCTGTCCTCATCATCAGAAGCACATACATGGAAGACTGGGATGTGGGGTTACAAATGCTGCGCAATTTATACACAGAGATTGTTTACACACCCATCTCAACTCCAGATGGAACAATTGTTAAGAAGTTTAGAGGAAATAATAGTGGTCAGCCTTTCACTGTTGTAGACAACTCTCTTATGGTTGTCCTCGCCATGCACTATGCTCTCATTAAAGAGTGCGTTGAGTTTGAAGAGATTGACAGCACGTGCGTGTTCTTTGTCAACGGTGATGATTTGTTAATTGCTGTGAATCCAGAGAAAGAGAGCATTCTTGACAGATTGTCACAACACTTCACAGATCTTGGTTTGAATTATGATTTCTCGTCAAGAACAAGAAATAAGGAAGAGTTATGGTTTATGTCCCATAGAGGCTTATTGATTGAGGGCATGTACGTACCGAAACTTGAAGAAGAAAGAATTGTGTCCATTCTACAATGGGACAGAGCAGATTTGGCAGAACACAGACTCGAAGCAATCTGCGCAGCCATGATAGAGTCCTGGGGATACTCTGAACTAACACACCAAATCAGGAGATTTTACTCATGGTTGTTGCAACAACAACCCTTCGCAGCAATAGCGCAAGAAGGAAAAGCCCCTTATATAGCAAGCATGGCATTGAGGAAACTGTATATGGATAGGGCCGTGGATGAGGAAGAGCTGAAAGCCTTCACTGAAATGATG?GTTGCACTGGATGACGAGTTTGAGTTTGATTCATATGAAGTGCATCATCAAGTAAAT---------GAAACAATCGATGCAGGAGGGAGCAGCAAGAAAGATGCGAGACCAGAACAGGGTAGCATCCAGTCAAATCCTAACAAGGGAAAG---------------------------GATAAGGACGTAAATGTTGGTACATCTGGAACACATACTGTACCAAGAATAAAGGCGATTACGTCCAAAATGAGAATGCCTCAAAGCAAGGGGGCGACCGTGCTAAACTTGGAACACTTGCTCGAGTATGCTCCACAGCAAATTGATATCTCAAATACTCGGGCAACTCAATCACAGTTTGATACATGGTATGAAGCAGTACGGGTGGCGTACGACATAGGGGAAACTGAAATGCCAACTGTGATGAATGGGCTTATGGTTTGGTGCATTGAGAATGGAACCTCGCCAAATATCAACGGAGTTTGGGTTATGATGGATGGAAATGAACAAGTTGAATACCCGTTGAAACCAATCGTTGAGAATGCAAAACCAACCCTTAGGCAAATCATGGCACATTTCTCAGATGTTGCAGAAGCGTATATAGAAATGCGCAACCAAAAGGAACCATATATGCCACGATATGGTTTAAATCGAAATTTGCGGGATGGAAGTTTGGCGCGCTATGCCTTTGACTTTTATGAAGTCACATCACGAACACCAGTGAGGGCTAGGGAAGCGCACATACAAATGAAAGCCGCAGCATTGAAATCAGCTCAACCTCGACTTTTCGGGTTGGATGGTGGCATCAGTACACAAGAGGAGAACACAGAGAGGCACACCACCGAGGATGTTTCTCCAAGTATGCATACTCTACTTGGAGTCAAGAACATGTGATTGTAATGTCTCTCCGGACGATATATAAGTATTTACA-TATGCAGTAAGTATTTTGGCTTTTCCTGTACTACTTTTATTGTAACTAATAATCAGTTTGAATATTACTAATAGATAGAGGTGGCAGGGTGATTTCGTCATTGT-GGTGACTCTATCTGTTATTTCTGCATTATT-------------------------------------------------------------------------------------------------------------------------------------------------------------------------------------------------------------------------------------AAGTTTTGTATAAAAGTGCCGGGTTGTCGTCGTTGTAGATGGTCTATCGATTAGGTGGTGTTATGATTTTGTCATGGCAGTGACTATGTCTGGGCTTATC?TACTTGGGTGATGTTGTGATTTCGTCATAACAGTGACTGTAGACTTCAATCAGGAGA?
	SS082A_88    ?????????????????????????????????????????????????????????????????????????????????????????????????????????????????????????????????????????????????????????????????????????????????????????????????????????????????????????????????????AATGCAAACTTCCATACTCACCCGCTCCTTTTGGGCTAGTTGCGGGGAAACGAGAAGTTTCAACC-------------------------------------------------------------------------------------------------------------------------------------------------------------------------------------------------------------------------------------------------------------------------------------------------------------------------------------------------------------------------------------------------------------------------------------------------------------------------------------------------------------------------------------------------------------------------------------------------------------------------------------------------------------------------------------------------------------------ACCACTGACCCCTTCGCAAGTTTGGAGATGCAGCTTAGTGCGCGATTACGAAGGCAAGAGTTTGCAACTATTCGAACATCCAAGAATGGTACTTGCATGTATCGATACAAGACTGATGTCCAGATTGCGCGCATCCAAAAGAAGCGTGAGGAAAGAGAAAGAGAGGAATATAATTTCCTAATGGCTGAGGCAAGTGTTGTGTCGAAGATCACTATTGCTGGTGGAGAGCCACCTTCAAAACTTGAATCACAAGTGCGGAGGGGTGTCATCCACACAACTCCAAGGATGCGCACAGCAAAAACATATCACACGCCAAAGTTGACAGAGGGACAAATGAACCACCTAATCAAGCAGGTGAAGCAAATTATGTCAACCAAAGGAGGGTCTGTTCAACTGATTAGCAAGAAAAGTACCCATGTTCATTATAAAGAAGTTTTGGGATCACATCGCGCAGTTGTTTGCACTGCA?CATATGAGAGGTTTACGAAAGAGAGTGGACTTTCGGTGTGATAAATGGACCGTTGTGCGTCTACAGCATCTCGCCAGGACGGACAAGTGGACTAACCAAGTTCGTGCTACTGATCTACGCAAGGGCGATAGTGGAGTTATATTGAGTAATACTAATCTCAAAGGAAACTTTGGGAGAAGCTCGGAGGGCCTATTCATAGTGCGTGGGTCGCACGAAGGAAAAATCTATGATGCACGTTCCAAGGTTACTCAAGGGGTTATGAATTCAATGGTTCAGTTCTCAAGCGCTGAAAGCTTTTGGAAGGGATTGGACGGCAATTGGGCACAAATGAGATATCCTACAGATCATACATGTGTGGCAGGCTTACCAGTTGAAGACTGTGGCAGAGTTGCAGCGATAATGACACACAGTATTTTACCGTGCTATAAGATAACCTGCCCTACCTGCGCCCAACAATATGCCAACTTGCCAGCCAGTGACTTACTTAAGATATTACACAAGCACGCAAGTGATGGTCTAAATCGATTGGGGGCAGACAAAGATCGCTTTGTGCATGTCAAAAAGTTCTTGACAATCTTAGAGCACTTAACTGAACCGGTTGATCTGAGTCTAGAAATTTTCAATGAAGTGTTCAAGTCTATAGGGGAGAAGCAACAATCACCTTTCAAAAACCTGAATATTCTGAATAATTTCTTTTTGAAAGGAAAGGAAAATACAGCTCGTGAATGGCAGGTGGCTCAATTAAGCTTACTTGAATTGGCAAGATTCCAAAAGAACAGAACGGATAATATCAAGAAAGGAGACATCTCGTTCTTTAGGAATAAACTATCTGCCAAAGCAAATTGGAACTTGTATCTGTCATGTGATAACCAGCTGGATAAGAATGCAAACTTCCTGTGGGGACAGAGGGAATATCATGCTAAGCGATTTTTCTCGAACTATTTCGAGGAAATTGATCCAGCGAAGGGCTATTCAGCATACGAAAATCGTTTGCATCCGAATGGGACAAGAAAACTTGCAATTGGAAACCTAATTGTACCACTTGATCTGGCTGAGTTTAGGCGGAAGATGAAAGGTGATTATAAAAGACAGCCAGGGGTGAGTAAGAAGTGCACGAGCTCGAAGGATGGAAACTACGTGTATCCCTGTTGCTGCACCACACTCGATGATGGCTCAGCTGTTGAATCAACATTTTACCCGCCAACTAAGAAACACCTCGTAATAGGTAATAGTGGCGACCAAAAGTATGTTGACTTACCAAAAGGGAATTCTGAGATGTTATATATTGCCAGGCAAGGCTTCTGCTACATTAACATTTTCCTCGCGATGTTGATTAACATTAGTGAGGAAGATGCAAAGGATTTCACTAAGAAGGTTCGTGACATGTGTGTGCCAAAGCTTGGAACCTGGCCAACCATGATGGATCTGGCTACAACTTGTGCTCAAATGAAAATATTCTACCCTGATGTTCATGATGCAGAACTGCCTAGAATACTAGTCGATCACGAAACGCAGACATGCCATGTGGTTGACTCGTTTGGCTCACAAACAACTGGGTATCATATTTTGAAAGCATCTAGCGTGTCCCAACTTATTTTGTTTGCCAATGATGAGTTGGAGTCTGACATTAAGCACTATAGAGTTGGTGGTATTCCTGGAGCATGCCCTGAGCTTGGGTCCACAAT-ATCACCTTTTAGAGAAGGAGGAATCATAATGTCTGAGTCAGCAGCGCTAAAACTGCTCCTAAAGGGAATTTTTAGGCCCAAAGTGATGAAGCAATTGCTACTGGATGAACCATATTTGCTCATTTTATCGATATTATCTCCTGGTATACTTATGGCTATGTACAACAATGGGATATTTGAGTTGGCGGTGAAGTTGTGGATCAATGAGAAACAATCTATAGCCATGATAGCATCGTTATTGTCCGCCTTGGCTTTACGAGTGTCAGCAGCAGAAACACTCGTTGCACAGAGGATTATAATTGACACGGCAGCAACAGATCTTCTCGATGCTACGTGTGATGGATTCAATTTAAATCTGACATATCCCACTGCACTCATGGTGTTGCAAGTTGTTAAGAACAGAAATGAATGTGATGATACGTTGTTTAAAGCAGGTTTTTCACATTACAACATGAGTGTCGTGCAGATTATGGAAAAAAATTATCTAAGCCTCTTGGGCGATGCTTGGAAAGATTTAACCTGGCGAGAAAAATTATCCGCAACATGGCACTCATACAAAGCAAAGCGCTCTATCACTCAGTTCATAAAACCCATAGGCAAAGCAGATTTAAAAGGGTTGTACAACATATCACCGCAAGCATTCTTGGGTCAGGGCGTACAGAGAGTCAAAGGCACCGCCTCAGGGTTGAATGAGCGACTCAATAATTATATTAATACTAAGTGTGTAAATATTTCATCCTTTTTCATTCGTAGAATTTTCCGGCGCTTGCCAACTTTTGTAACTTTCATTAATTCATTATTAGTTATTAGTATGCTAACTAGTGTAGTAGCAGTGTGTCAAGCAATAATTCTAGATCAAAGGAAGTATAGAAAAGAAATTGAGTTGATGCAGATGGAGAAGAATGAAATTGTTTGTATGGAGTTGTATGCGAGTCTGCAGCGCAAACTTGAGCGTGAATTCACATGGGATGAATATATGGAATATTTGAAATCTGTGAATCCCCAAATAGTTCAATTCGCGCAAGCTCAAATGGAAGAATATAATGTGCGACATCAGCGCTCCACACCAGGTGTTAAGAATTTAGAGCAGGTGGTAGCATTTATAACTCTAATTATCATGATGTTTGATGCTGAAAGGAGCGACTGTGTATTTAAGACTCTCAACAAATTCAAAGGCATCGTTTCTTCAATGGATCATGAAGTTAGACACCAGTCCTTGGATGATGTAATCAAGAATTTCGATGAAAGGAACGAAGTTATTGATTTTGAGCTAAATGAGGATACAATTAAAACATCATCAGTGTTGGATACGAAGTTTAGCGACTGGTGGGATCGTCAAATCCAAATGGGACACACACTTCCCCATTATAGAACTGAGGGACACTTCATGGAATTCACAAGGGCAACTGCTGTACAAGTGGCCAACGACATCGCGCATAGTGAGCACCTAGACTTTCTAGTGAGGGGAGCTGTTGGGTCTGGAAAATCCACTGGACTGCCTGTCCATCTCAGTGCAGCTGGATCCGTGCTTTTGATAGAACCAACTCGACCACTTGCAGAAAACGTGTTCAAGCAATTATCCAGTGAACCGTTTTTCAAGAAACCAACACTGCGCATGCGAGGAAATAGTGTGTTTGGTTCCTCTCCAATCTCCATCATGACTAGCGGCTTTGCATTGCACTACTATGCTAATAATCGCTCTCAGCTAACTCAGTTTAATTTCATAATTTTTGATGAATGTCATGTTTTAGATCCTTCTGCAATGGCATTTCGTAGCTTGTTAAGTGTGTATCACCAAACATGCAAAGTGTTAAAGGTGTCAGCTACTCCAGTGGGGAGGGAGGTCGAGTTCACAACACAACAACCAGTTAAATTGGTGGTTGAGGATACACTTTCATTCCAATCTTTTGTTGATGCGCAAGGCTCAAAAACCAATGCCGACGTTGTTCAGCATGGTTCGAACATACTCGTGTGTGTGTCGAGTTACAATGAAGTGGATACATTAGCCAAGCTTCTAACAGATAGGAATATGGTAGTCTCAAAAGTTGATGGCAGAACAATGAAGCACGGATGCTTGGAAATTGTAACGAAAGGGACTAGTGCAAAGCCACATTTTGTCGTAGCAACCAACATTATTGAAAATGGAGTAACTTTAGATATAGATGTAGTTGTAGATTTTGGGCTTAAAGTCTCACCGTTTTTAGATATTGACAATAGGAGCATTGCATACAATAAGATTAGTGTTAGCTATGGTAGAAGAATTCAGAGGTTGGGCCGTGTTGGGCGCTTTAAGAAGGGAGTGGCATTGCGTATTGGACACACCGAAAAGGGAATTATTGAGATTCCAAGTATGATTGCTAGTGAAGCTGCGCTTGCGTGCTTTGCATACAATTTGCCAGTAATGACAGGGGGTGTTTCAACTAGCCTCATTGGCAATTGTACTGTTCGTCAAGTTAAAACTATGCAACAATTTGAGCTGAGTCCATTCTTTATACAAAATTTTGTTGCCCATGATGGATCAATGCATCCTGTCATACATGACATTCTTAAGAAGTATAAACTGCGAGATTGTATGACGCCCTTGTGTGATCAATCCATACCTTACAGAGCCTCGAGCACTTGGTTGTCTGTTAGTGAGTACGAACGACTCGGAGTAGTTTTGGACATTCCAAAACAGATCAAGATTGCATTCCACATCAAGGACATCCCTCCTAAGTTGCATGAAATGCTTTGGGAAACAGTTATCAAATATAAGGATGTTTGTTTGTTTCCAAGTATT-CGGGCTTCATCCATTAGCAAAATTGCATACACACTGCGCACTGATCTTTTTGCAATTCCCAGAACCCTAATTTTAGTTGAAAGATTGCTCGAGGAGGAACGAGTGAAACAGAGTCAATTCAGAAGTCTTATTGATGAAGGATGCTCAAGCATGTTTTCAATTGTCAATTTAACAAACACTCTTAGAGCTAGATATGCAAAGGATTACACTGCAGAAAACATACAGAAGCTCGAGAAAGTGAGGAGTCAGTTAAAGGAGTTCTCAAATTTAAATGGCTCTGCATGCGAGGAGAACTTAATGAAGAGGTATGAATCTCTACAGTTTGTGCACCATCAAGCAACAACTTCACTCGCAAAGGATTTGAAGTTGAAAGGAGTTTGGAAGAAGTCATTAGTTGTGCAGGACTTACTCATAGCGGGTGCCGTTGCTATTGGTGGAATAGGGCTCATCTATAGTGGGTTTACTCAATCAGTTGAAACTGTGTCTCACCAGGGCAAGAACAAATCCAAAAGAATTCAAGCATTGAAGTTTCGACACGCCCGCGATAAGAGGGCTGGCTTTGAAATTGATAACAATGACGATACAATAGAAGAATTCTTTGGATCTGCATACAGGAAGAAGGGAAAAGGTAAAGGCACCACTGTTGGTATGGGCAAGTCAAGCAGGAGGTTTGTTAATATGTATGGATTTGACCCAACAGAATATTCATTCATCCAGTTCGTTGATCCGCTCACTGGAGCTCAAATTGAAGAGAACGTCTATGCTGATATTAGAGACATCCAAGAGCGCTTTAGTGATGTCCGCAAGAAAATGGTAGAGGATGATGAAATCGAATTGCAAGCATTGGGCAGCAACACAACCATTCATGCTTACTTCAGGAAAGATTGGTCTGACAAGGCTCTTAAAATTGATTTGATGCCACACAACCCACTCAAAATCTGTGATAAATCGAATGGCATTGCTAAGTTTCCTGAAAGAGAACTTGAGTTGAGGCAAACTGGGCCAGCAGTAGAGGTTGATGTGAAAGACATTCCAAAACAGGAAGTGGAGCATGAAGCCAAATCACTCATGAGAGGTTTAAGGGATTTCAATCCAATTGCTCAAACAGTTTGCAGAGTAAAAGTGTCTGTTGAATATGGAACGTCTGAAATGTATGGGCTCGGTTTTGGTGCGTATATTATAGTAAACCACCATCTATTCAAGAGTTTCAATGGATCCATGGAAGTGCGATCAATGCATGGAACATTCAGAGTGAAGAATTTGCATAGCCTGAGCGTTTTACCGATCAAAGGCAGAGACATTATCATCATAAAGATGCCAAAGGATTTCCCTGTTTTCCCACAAAAACTGCACTTCCGAGCTCCAGTGCAGAATGAGAGGATTTGTTTGGTTGGAACTAATTTTCAAGAAAAACATGCATCATCAATCATCACAGAAACGAGTACTACATACAATGTACCGGGCAGCACTTTTTGGAAGCATTGGATTGAAACAAATGATGGGCATTGTGGATTACCAGTAGTGAGTACAGCTGATGGATGTCTAGTTGGAATACACAGCTTGGCGAATAATGTGCAAACCACGAATTATTATTCAGCCTTTGATGAGGATTTTGAAAGTAAGTATCTCCGAACTAATGAGCATAATGAGTGGACCAAATCGTGGGTATATAACCCAGATACTGTGTTGTGGGGTCCATTGAAGCTCAAGGAGAGTACCCCTAAAGGCCTGTTTAAGACAACAAAACTTGTACAGGATTTAAT------TGATCATGATGTTGTTGTAGAGCAAGCTAAACATTCTGCGTGGATGTATGAGGCTCTAACAGGGAATTTGCAAGCTGTGGCGACAATGAAGAGTCAGCTAGTGACAAAGCACGTGGTCAAAGGGGAGTGTCGGCACTTCAAAGAGTTCTTAACTGTGGACTCGGAAGCAGAAGCT------TTCTTCAGGCCTTTGATGGATGCTTATGGGAAGAGCTTGTTAAATAGAGAAGCATATATAAAGGACATAATGAAATACTCAAAGCCTATTGATGTTGGAATAGTAGACTGTGAT--GCTTTTGAAGAGGCTATCAATAGGGTTATCATTTATCTGCAA-GTGCATGGCTTCCAGAAATGCAATTACATCACCGATGAGCAGGAAATTTTCAAAGCTCTCAATATGAAAGCTGCTGTCGGAGCTATGTATGGAGGCAAGAAGAAAGACTACTTCGAGCATTTTACTGAGGCGGATAAAGAGGAAATTGTTATGCAAAGTTGCCTTCGATTGTACAAGGGCTCGCTTGGCATATGGAATGGATCATTGAAAGCAGAACTTCGGTGCAAAGAGAAGATACTTGCAAATAAGACAAGGACATTCACTGCTGCACCTTTAGATACTCTACTGGGTGGAAAGGTGTGCGTTGATGATTTTAATAATCAGTTCTACTCAAAGAACATTGAATGCTGCTGGACTGTTGGAATGACTAAGTTTTATGGAGGTTGGGACAAATTGCTTCGGCGTCTACCTGAAAATT---GGGTGTACTGCGATGCCGATGGTTCACAATTCGATAGTTCACTCACCCCATACCTAATTAATGCTGTTCTCATCATCAGAAGCACATACATGGAAGATTGGGACTTGGGGTTGCAAATGTTGCGCAATTTGTACACAGAGATAATTTACACACCAATCTCAACTCCAGATGGAACAATTGTCAAGAAGTTTAGAGGTAATAATAGCGGTCAACCTTCTACCGTTGTGGATAATTCTCTCATGGTTGTCCTTGCTATGCATTACGCTCTCATTAAGGAGTGCGTTGAGTTTGAAGAAATCGACAGCACGTGTGTATTCTTTGTTAATGGTGATGACTTATTGATTGCTGTGAATCCGGAGAAAGAGAGCATTCTCGATAGAATGTCACAACATTTCTCAGATCTTGGTTTGAACTATGATTTTTCGTCGAGAACAAGAAGGAAGGAGGAATTGTGGTTCATGTCCCATAGGGGCCTGCTAATCGAGGGTATGTACGTGCCAAAGCTTGAAGAAGAGAGAATTGTATCCATTCTGCAATGGGATAGAGCTGATCTGCCAGAGCACAGATTATAAGCGATTTGTGCAGCAATGATAGAATCCTGGGGTTATTTTGAGTTAACCCACCAAATCAGGAGATTCTACTCATGGTTGTTGCAACAGCAACCTTTTTCAACGATAGCACAGGAAGGAAAAGCTCCATACGGGGCGAGTATGGCATTGAAGAAGTTGTACATGTATAGGACAATAAATGAGGAGGAACTGAAGGCTTTCACTGAAATGATG?GTTGCCTTGGATGACAATTTTGAGTGCGATACTTATGAAGTGCACCATCAAGGAAAT---------GACACAATCGATGCAGGAGGAAGCACTAAGAAGGATGCAAAACAAGAGCAAGGTAGCATTCAACCAAATCTCAACAAGGAAAAG---------------------------GAAAAGGACGTGAATGTTGGAACATCTGGAACTCATACTGTGCCACGAATTAAAGCTATCACGTCCAAAATGAGAATGCCCAGGAGTAAAGGCGCAACTGTACTAAATTTGGAACACTTACTCGAGTATGCTCCACAGCAAATTGACATCTCAAATACTCGGGCAACTCAATCACAGTTTGATACGTGGTATGAAGCAGTACAACTTGCATACGACATAGGAGAAACTGAAATGCCAACTGTGATGAATGGGCTTATGGTTTGGTGCATTGAAAATGGAACCTCGCCAAACATCAACGGAGTTTGGGTTATGATGGATGGAGATGAACAAGTCGAATACCCACTGAAACCAATCGTTGAGAATGCAAAACCAACACTTAGGCAAATCATGGCACATTTCTCAGATGTTGCAGAAGCGTATATAGAAATGCGCAACAAAAAGGAACCATATATGCCACGATATGGTTTAGTTCGTAATCTGCGCGATGGAAGTTTGGCTCGCTATGCTTTTGACTTTTATGAAGTTACATCACGGACACCAGTGAGGGCTAGAGAGGCACACATTCAAATGAAGGCCGCAGCTTTAAAATCAGCTCAATCTCGACTTTTCGGATTGGATGGTGGCATTAGTACACAAGAGGAAAACACAGAGAGGCACACCACCGAGGATGTTTCTCCAAGTATGCATACTCTACTTGGAGTCAAGAACATGTGATTGTAGTGTCTTTCCGGACGATATATAGATATTTATG-TTTGCAGTAAGTATTTTGGCTTTTCCTGTACTACTTTTATCGAAATTAATAATCAGTTTGAATATTACTGGCAGATAGGGGTGGTATAGCGATTCCGTCGTTGT-AGTGACCTTAGCTGTCGTTTCTGTATTATT-------------------------------------------------------------------------------------------------------------------------------------------------------------------------------------------------------------------------------------ATGTTTTGTATAAAAGTGCCGGGTTGTTGTTGTTGTGGCTGATCTATCGATTAGGTGATGTTGCGATTTTGTCGTAGCAGTGACTATGTCTGGATATATCTTGCTTGGGTGATGCTGTGATTCTGTCATA?????????????????????????????
	N_605        AAATTAAAACAACTCAATACAACATAAGAAAATCAACGCAAAAACACTCACAAAAGCTTTCAACTCTAATTCAAACAATTTGTTAAGTTTCAATTTCGATCTTCATCAAACAAACTCTTTCAATTTCAGTGTAAGCTATCGTAATTCAGTAAGTTATTTCAAACTCTCGTAAATTGCAGAAGATCATCCATGGCAATTTACACATCAACAATCCAGTTTGGTTCCATTGAATGCAAACTTCCATACTCACCCGCTCCTTTTGGGCTAGTTGCGGGGAAACGAGAAGTTTCAACC-------------------------------------------------------------------------------------------------------------------------------------------------------------------------------------------------------------------------------------------------------------------------------------------------------------------------------------------------------------------------------------------------------------------------------------------------------------------------------------------------------------------------------------------------------------------------------------------------------------------------------------------------------------------------------------------------------------------ACCACTGACCCCTTCGCAAGTTTGGAGATGCAGCTCAGTGCGCGATTACGAAGGCAGGAGTTTGCAACTATTCGAACATCCAAGAATGGTACTTGCATGTATCGATACAAGACTGATGTCCAGATTGCGCGCATTCAAAAGAAGCGCGAGGAAAGAGAAAGAGAGGAATATAATTTCCAAATGGCTGCGTCAAGTGTTGTGTCGAAGATCACTATTGCTGGTGGAGAGCCACCTTCAAAACTTGAATCACAAGTGCGGAGGGGTGTCATCCACACAACTCCAAGGATGCGCACAGCAAAAACATATCACACGCCAAAGTTGACAGAGGGACAAATGAACCACCTTATCAAGCAGGTGAAGCAAATTATGTCAACCAAAGGAGGGTCTGTCCAACTGATTAGCAAGAAAAGTACCCATGTTCACTATAAAGAAGTTTTGGGATCACATCGCGCAGTTGTTTGCACTGCA?CATATGAGAGGTTTACGAAAGAGAGTGGACTTTCGGTGTGATAAATGGACCGTTGTGCGTCTACAGCATCTCGCCAGGACGGACAAGTGGACTAACCAAGTTCGTGCTACTGATCTACGCAAGGGCGATAGTGGAGTTATATTGAGTAATACTAATCTCAAAGGAAACTTTGGGAGAAGCTCGGAGGGCCTATTCATAGTGCGTGGGTCGCACGAAGGAAAAATCTATGATGCACGTTCCAAGGTTACTCAAGGGGTTATGGATTCAATGGTTCAGTTCTCAAGCGCTGAAAGCTTTTGGAAGGGATTGGACGGCAATTGGGCACAAATGAGATATCCTACAGATCATACATGTGTGGCAGGCTTACCAGTTGAAGACTGTGGCAGAGTTGCAGCGATAATGACACACAGTATTTTACCGTGCTATAAGATTACCTGCCCTACCTGTGCCCAACAATATGCCAACTTGCCAGCCAGTGACTTACTTAAGATATTACACAAGCACGCAAGTGATGGTCTAAATCGATTGGGGGCAGACAAAGATCGCTTTGTGCATGTCAAAAAGTTCTTGACAATCTTAGAGCACTTAACTGAACCGGTTGATCTGAGTCTAGAAATTTTCAATGAAGTATTCAAGTCTATAGGGGAGAAGCAACAATCACCTTTCAAAAACCTGAATATTCTGAATAATTTCTTTTTGAAAGGAAAGGAAAATACAGCTCGTGAATGGCAGGTGGCTCAATTAAGCTTACTTGAATTGGCAAGATTCCAAAAGAACAGAACGGATAATATCAAGAAAGGAGACATCTCGTTCTTTAGGAATAAACTATCTGCCAAAGCAAATTGGAACTTGTATCTGTCATGTGATAACCAGCTGGATAAGAATGCAAGCTTCCTGTGGGGACAGAGGGAATATCATGCTAAGCGATTTTTCTCGAACTATTTCGAGGAAATTGATCCAGCGAAGGGCTATTCAGCATACGAAAATCGTTTGCATCCGAATGGGACAAGAAAACTTGCAATTGGAAACCTAATTGTACCACTTGATCTGGCTGAGTTTAGGCGGAAGATGAAAGGTGATTATAAAAGACAGCCAGGGGTGAGTAAGAAGTGCACGAGCTCGAAGGATGGAAACTACGTGTATCCCTGTTGTTGCACTACACTTGATGATGGCTCAGCTGTTGAATCAACATTTTACCCGCCAACTAAGAAGCACCTCGTAATAGGTAATAGTGGCGACCAAAAGTATGTTGACTTACCAAAAGGGAATTCTGAGATGTTATATATTGCCAGGCAAGGCTTCTGTTACATTAACATTTTCCTCGCGATGTTGATTAACATTAGTGAGGAAGATGCAAAGGATTTCACTAAGAAGGTTCGTGACATGTGTGTGCCAAAGCTTGGAACCTGGCCAACCATGATGGATCTGGCTACAACTTGTGCTCAAATGAAAATATTCTACCCTGATGTTCATGATGCAGAACTGCCTAGAATACTAGTCGATCACGAAACGCAGACATGCCATGTAGTTGACTCGTTTGGCTCACAAACAACTGGGTATCATATTTTGAAAGCATCTAGCGTGTCCCAACTTATTTTGTTTGCTAATGATGAGTTGGAGTCTGACATTAAGCACTATAGAGTTGGTGGTATTCCTGGAGCATGCCCTGAGCTTGGGTCCACAAT-ATCACCTTTTAGAGAAGGAGGAATCATAATGTCTGAGTCAGCAGCGCTAAAACTGCTCCTAAAGGGAATTTTTAGGCCCAAAGTGATGAAGCAATTGCTACTGGATGAACCATATTTGCTCATTTTATCGATATTATCTCCTGGTATACTTATGGCTATGTACAACAATGGGATATTTGAGTTAGCGGTGAAGTTGTGGATCAATGAGAAACAATCTATAGCCATGATAGCATCGTTATTGTCCGCCTTGGCTTTACGAGTGTCAGCAGCAGAAACACTCGTTGCACAGAGGATTATAATTGACACGGCAGCAACAGATCTTCTCGATGCTACGTGTGATGGATTCAATTTAAATCTGACATATCCCACTGCACTCATGGTGTTGCAAGTTGTTAAGAACAGAAATGAATGTGATGATACGTTGTTTAAAGCAGGTTTTTCACATTACAACATGAGTGTCGTGCAGATTATGGAAAAAAATTATCTAAGCCTCTTGGGCGATGCCTGGAAAGATTTAACCTGGCGAGAAAAATTATCCGCAACATGGCACTCATACAAAGCAAAGCGCTCTATCACTCAGTTCATAAAACCCATAGGCAAAGCAGATTTAAAAGGGTTGTACAACATATCACCGCAAGCATTCTTGGGTCAGGGCGTACAGAGAGTCAAAGGCACCGCCTCAGGGTTGAATGAGCGACTCAATAATTATATCAATACTAAGTGTGTAAATATTTCATCCTTTTTCATTCGTAGAATTTTCCGGCGCTTGCCAACTTTTGTAACTTTCATTAATTCATTATTAGTTATTAGTATGCTAACTAGTGTAGTAGCAGTGTGTCAAGCAATAATTCTAGATCAAAGGAAGTATAGAAAAGAAATTGAGTTGATGCAGATTGAGAAGAATGAAATTGTTTGTATGGAGTTGTATGCGAGTCTGCAGCGCAAACTTGAGCGTGAATTCACATGGGATGAATATATGGAATATTTGAAATCTGTGAATCCCCAGATAGTTCAATTCGCGCAAGCTCAAATGGAAGAATATAATGTGCGACATCAGCGCTCCACACCAGGTGTTAAGAATTTAGAGCAGGTGGTAGCATTTATAACTCTAATTATCATGATGTTTGATGCTGAAAGGAGCGACTGTGTATTCAAGACTCTCAACAAATTCAAAGGCATCGTTTCTTCAATGGATCATGAAGTTAAACACCAGTCCTTGGATGATGTAATCAAGAATTTCGATGAAAGGAACGAAGTTATTGATTTTGAGCTAAATGAGGATACAATTAAAACATCATCAGTGTTGGACACGAAGTTTAGCGACTGGTGGGATCGGCAAATCCAAATGGGACACACACTTCCCCATTATAGAACTGAGGGACACTTCATGGAATTCACAAGGGCAACTGCTGTACAAGTGGCCAACGACATCGCGCATAGTGAGCACCTAGACTTTCTAGTGAGGGGAGCTGTTGGGTCTGGAAAATCTACTGGACTGCCTGTCCATCTCAGTGCAGCTGGATCCGTGCTTTTGATAGAACCAACTCGACCACTTGCAGAAAACGTGTTCAAGCAATTATCCAGTGAACCGTTTTTCAAGAAGCCAACACTGCGCATGCGAGGAAATAGTGTGTTTGGTTCCTCTCCAATCTCCATCATGACTAGCGGCTTTGCGTTGCACTACTATGCTAATAATCGCTCTCAGCTAACTCAGTTTAATTTCATAATTTTTGATGAATGTCATGTTTTAGATCCTTCTGCAATGGCATTTCGTAGCTTGTTAAGTGTGTATCACCAAACATGCAAAGTGTTAAAGGTGTCAGCCACTCCAGTGGGAAGGGAGGTCGAGTTCACAACACAACAACCAGTTAAATTGGTGGTTGAGGATACACTTTCATTCCAATCTTTTGTTGATGCGCAAGGCTCAAAAACCAATGCCGACGTTGTTCAGCATGGTTCGAACATACTCGTGTATGTGTCGAGTTACAATGAAGTGGATACATTAGCCAAGCTTCTAACAGATAGGAATATGGTAGTCTCAAAAGTTGATGGCAGAACAATGAAGCACGGATGCTTAGAAATTGTAACGAAAGGGACTAGTGCAAAGCCACATTTTGTCGTAGCAACCAACATTATTGAAAATGGAGTAACTTTAGATATAGATGTAGTTGTAGATTTTGGACTTAAAGTCTCACCGTTTTTAGATATTGACAATAGGAGCATTGCATACAATAAGATTAGTGTTAGCTATGGAGAAAGAATTCAGAGGTTGGGCCGTGTTGGGCGCTTTAAGAAGGGAGTGGCATTGCGTATTGGACACACCGAAAAGGGAATTATTGAGATTCCAAGTATGATTGCTAGTGAAGCTGCGCTTGCGTGCTTTGCATACAATTTGCCAGTAATGACAGGGGGTGTTTCAACTAGCCTCATTGGCAATTGTACTGTTCGTCAAGTTAAAACTATGCAACAATTTGAGCTGAGTCCATTCTTTATACAAAATTTTGTTGCCCATGATGGATCAATGCATCCTGTCATACATGACATTCTTAAGAAGTATAAACTGCGAGATTGTATGACGCCCTTGTGTGATCAATCCATACCTTACAGAGCCTCAAGCACTTGGTTGTCTGTTAGTGAGTACGAACGACTCGGAGTGGTTTTGGACATTCCAAAACAGATCAAGATTGCATTCCACATCAAGGACATCCCTCCTAAGTTGCATGAAATGCTTTGGGAAACAGTTATCAAATATAAGGATGTTTGTTTGTTTCCAAGTATT-CGGGCTTCATCCATTAGCAAAATTGCATACACACTGCGCACTGATCTTTTTGCAATTCCCAGAACCCTAATTCTAGTTGAAAGATTGATCGAGGAGGAACGAGTGAAACAGAGTCAATTCAGAAGTCTCATTGATGAAGGATGCTCAAGCATGTTTTCAATTGTTAATTTAACAAACACTCTTAGAGCTAGATATGCAAAGGATTACACTGCAGAAAACATACAGAAGCTCGAGAAAGTGAGAAGTCAGTTAAAGGAGTTCTCAAATTTAAATGGCTCTGCATGTGAGGAGAACTTAATGAAGAGGTATGAATCTCTACAGTTTGTGCATCATCAAGCAACAACTTCACTCGCAAAGGATTTGAAGTTGAAAGGAGTTTGGAAGAAGTCATTAGTTGTGCAGGACTTACTCATAGCGGGTGCCGTTGCTATTGGTGGAATAGGGCTCATCTATAGTTGGTTTACTCAATCAGTTGAAACTGTGTCTCACCAGGGCAAGAACAAATCCAAAAGAATTCAAGCATTGAAGTTTCGACACGCCCGCGATAAGAGGGCTGGCTTTGAAATTGATAACAATGATGATACAATAGAGGAATTCTTTGGATCTGCATACAGGAAGAAGGGAAAAGGTAAAGGCACCACTGTTGGTATGGGCAAGTCAAGCAGGAGGTTTGTTAATATGTATGGATTTGACCCAACAGAATATTCATTCATCCAGTTCGTTGATCCGCTCACTGGAGCTCAAATTGAAGAGAACGTCTATGCTGATATTAGAGACATCCAAGAGCGCTTTAGTGATGTCCGCAAGAAAATGGTAGAGGATGATGAAATCGAATTGCAAGCATTGGGCAGCAACACAACCATTCATGCTTACTTCAGGAAAGATTGGTCTGACAAGGCTCTAAAAATTGATTTGATGCCACACAACCCACTCAAAATCTGTGATAAATCGAATGGCATTGCTAAGTTTCCTGAAAGAGAACTTGAGTTGAGGCAAACTGGGCCAGCAATAGAGGTTGATGTGAAAGACATTCCAAAACAGGAAGTGGAGCATGAAGCCAAATCACTCATGAGAGGTTTAAGGGATTTCAATCCAATTGCTCAAACAGTTTGCAGAGTAAAAGTGTCTGTTGAATATGGAACGTCTGAAATGTATGGGTTCGGTTTTGGTGCGTATATTATAGTAAACCACCATCTATTCAAGAGCTTCAATGGATCCATGGAAGTGCGATCAATGCATGGAACATTCAGAGTGAAGAATTTGCATAGCTTGAGCGTTTTACCGATCAAAGGCAGAGACATTATCATCATAAAGATGCCAAAGGATTTCCCTGTTTTCCCACAAAAACTGCACTTCCGAGCTCCAGTGCAGAATGAGAGGATTTGTTTGGTTGGAACTAATTTTCAAGAAAAACATGCATCATCAATCATCACAGAAACGAGTACTACATACAATGTACCGGGCAGCACTTTTTGGAAGCATTGGATTGAAACAAATGATGGGCATTGTGGATTACCAGTAGTGAGTACAGCTGATGGATGTCTAGTTGGAATACACAGCTTGGCGAATAATGTGCAAACCACGAATTATTATTCAGCCTTTGATGAGGATTTTGAAAGTAAGTATCTCCGAACTAATGAGCATAATGAGTGGACCAAATCGTGGGTATATAACCCAGATACTGTGTTGTGGGGTCCATTGAAGCTCAAGGAGAGTACCCCTAAAGGCCTGTTTAAGACAACAAAACTTGTACAGGATTTAAT------TGATCATGATGTTGTTGTAGAGCAAGCTAAACATTCTGCGTGGATGTATGAGGCTCTAACAGGGAATTTGCAAGCTGTGGCGACAATGAAGAGTCAGCTAGTGACAAAGCACGTGGTCAAAGGGGAGTGTCGGCACTTCAAAGAGTTCTTAACTGTGGATTCGGAAGCAGAAGCT------TTCTTCAGGCCTTTGATGGATGCTTATGGGAAGAGCTTGTTAAATAGAGAAGCATATATAAAGGACATAATGAAATACTCAAAGCCTATTGATGTTGGAATAGTAGACTGTGAT--GCTTTTGAAGAGGCTATCAATAGGGTTATCATTTATCTGCAA-GTGCATGGCTTCCAGAAATGCAATTACATCACCGATGAGCAGGAAATTTTCAAAGCTCTCAATATGAAAGCTGCTGTCGGAGCTATGTATGGAGGCAAGAAGAAAGACTACTTCGAGCATTTTACTGAGGCGGATAAAGAGGAAATTGTTATGCAAAGTTGCTTTCGATTGTACAAGGGCTCGCTTGGCATATGGAATGGATCATTGAAAGCAGAACTTCGGTGCAAAGAGAAGATACTTGCAAATAAGACAAGGACATTCACTGCTGCACCTTTAGATACTCTACTGGGTGGAAAGGTGTGCGTTGATGATTTTAATAATCAATTCTACTCAAAGAACATTGAATGCTGCTGGACTGTTGGAATGACTAAGTTTTATGGAGGTTGGGACAAATTGCTTCGGCGTCTACCTGAAAATT---GGGTGTACTGCGATGCCGATGGTTCACAATTCGATAGTTCACTCACCCCATACCTAATTAATGCTGTTCTCATCATCAGAAGCACATACATGGAAGATTGGGACTTGGGGTTGCAAATGTTGCGCAATTTGTACACAGAAATAATTTACACACCAATCTCAACTCCAGATGGAACAATTGTCAAGAAGTTTAGAGGTAATAATAGCGGTCAACCTTCTACCGTTGTGGATAATTCTCTCATGGTTGTCCTTGCTATGCATTACGCTCTCATTAAGGAGTGCGTTGAGTTTGAAGAAATCGACAGCACGTGTGTATTCTTTGTTAATGGTGATGACTTATTGATTGCTGTGAATCCGGAGAAAGAGAGCATTCTCGATAGAATGTCACAACATTTCTCAGATCTTGGTTTGAACTATGATTTTTCGTCGAGAACAAGAAGGAAGGAGGAATTGTGGTTCATGTCCCATAGAGGCCTGCTAATCGAGGATATGTACGTGCCAAAGCTTGAAGAAGAGAGAATTGTATCCATTCTGCAATGGGATAGAGCTGATCTGCCAGAGCACAGATTAGAAGCGATTTGTGCAGCAATGATAGAATCCTGGGGTTATTTTGAGTTAACGCACCAAATCAGGAGATTCTACTCATGGTTGTTGCAACAGCAACCTTTTTCAACGATAGCACAGGAAGGAAAAGCTCCATACATAGCGAGCATGGCATTGAAGAAGCTGTACATGAATAGGACAGTAGATGAGGAGGAACTGAAGGCTTTCACTGAAATGATG?GTTGCCTTGGATGATGAATTTGAGTGCGATACTTATGAAGTGCACCATCAAGGAAAT---------GACACAATCGATGCAGGAGGAAGCACTAAAAAGGATGCAAAACAAGAGCAAGGTAGCATTCAACCAAATCTCAACAAGGAAAAG---------------------------GAAAAGGACGTGAATGTTGGAACATCTGGAACTCATACTGTGCCACGAATTAAAGCTATCACGTCCAAAATGAAAATGCCCAAGAGTAAAGGTGCAACTGTACTAAATTTGGAACACTTACTCGAGTATGCTCCACAGCAAATTGACATCTCAAATACTCGAGCAACTCAATCACAGTTTGATACGTGGTATGAAGCAGTACAACTTGCATACGACATAGGAGAAACTGAAATGCCAACTGTGATGAATGGGCTTATGGTTTGGTGCATTGAAAATGGAACCTCGCCAAACATCAACGGAGTTTGGGTTATGATGGATGGAAATGAACAAGTCGAATACCCACTGAAACCAATCGTTGAGAATGCAAAACCAACACTTAGGCAAATCATGGCACATTTCTCAGATGTTGCAGAAGCGTATATAGAAATGCGCAACAAAAAGGAACCATATATGCCACGATATGGTTTAGTTCGTAATCTGCGCGATGGAAGTTTGGCTCGCTATGCTTTTGACTTTTATGAAGTTACATCACGGACACCAGTGAGGGCTAGAGAGGCACACATTCAAATGAAGGCCGCAGCTTTAAAATCAGCTCAATCTCGACTTTTCGGATTGGATGGTGGCATTAGTACACAAGAGGAAAACACAGAGAGGCACACCACCGAGGATGTTTCTCCAAGTATGCATACTCTACTTGGAGTGAAGAACATGTGATTGTAGTGTCTTTCCGGACGATATATAGATATTTATG-TTTGCAGTAAGTATTTTGGCTTTTCCTGTACTACTTTTATCGCAATTAATAATC?GTTTGAATATTACTGGCAGATAGGGGTGGTATAGCGATTCCGTCGTTGT-AGTGACCTTAGCTGTCGTTTCTGTATTATT-------------------------------------------------------------------------------------------------------------------------------------------------------------------------------------------------------------------------------------ATGTTTTGTATAAAAGTGCCGGGTTGTTGTTGTTGTGGCTGATCTATCGATTAGGTGATGTTGCGATTTTGTCGTAGCAGTGACTATGTCTGGAT?TTAGTTACTTGGGTGATGCTGTGATTCTGTCATAGCAGTGACTGTAAACTTCAATCAGGAGA?
	Mont         ?AATTAAAACAACTCAATACAACATAAGAAAAACAACGCAAAAACACTCACAAAAGCTTTCAACTCTAATTCAAACAAATTGTTAAGTTTCAATTTCGATCTCCATCAAACAAACTCTTTCAATTTCAGTGTAAGCTATCGTAATTCAGTAAGTTATTTCAAACTCTCGTAAATTGCAGAAGGTCATCCATGGCAACTTACACATCAACAATCCAGTTTGGTTCCATTGAATGCAAACTTCCATACTCACCCGCTCCTTTTGGGCTAGTTGCGGGGAAACGAGAAGTTTTAACC-------------------------------------------------------------------------------------------------------------------------------------------------------------------------------------------------------------------------------------------------------------------------------------------------------------------------------------------------------------------------------------------------------------------------------------------------------------------------------------------------------------------------------------------------------------------------------------------------------------------------------------------------------------------------------------------------------------------ACCACTGACCCCTTCGCAAGTTTGGAGATGCAGCTTAGTGCGCGATTACGAAGGCAAGAGTTTGCAACTATTCGAACATCCAAGAATGGTACTTGCATGTATCGATACAAGACTGATGTCCAGATTGCGCGCATTCAAAAGAAGCGCGAGGAAAGAGAAAGAGAGGAATATAATTTCCAAATGGCTGCGTCAAGTGTTGTGTCGAAGATCACTATTGCTGGTGGAGAGCCACCTTCAAAACTTGAATCACAAGTGCGGAGGGGTGTCATCCACACAACTCCAAGGATGCGCACAGCAAAAACATATCACACGCCAAAGCTGACAGAGGGACAAATGAACCACCTTATCAAGCAGGTGAAGCAAATTATGTCAACCAAAGGAGGGTCTGTTCAACTGATTAGCAAGAAAAGTACTCATGTTCACTATAAAGAAGTTTTGGGATCACATCGCGCAGTTGTTTGCACTGCA?CATATGAGAGGTTTACGAAAGAGAGTGGACTTTCGGTGTGATAAATGGACCGTTGTGCGTCTACAGCATCTCGCCAGGACGGACAAGTGGACTAACCAAGTTCGTGCTACTGATCTACGCAAGGGCGATAGTGGAGTTATATTGAGTAATACTAATCTCAAAGGAAACTTTGGGAGAAGCTCGGAGGGCCTATTCATAGTGCGTGGGTCGCACGAAGGAAAAATCTATGATGCACGTTCCAAGGTTACTCAAGGGGTTATGGATTCAATGGTTCAGTTCTCAAGCGCTGAAAGCTTTTGGAAGGGATTGGACGGCAATTGGGCACAAATGAGATATCCTACAGATCATACATGTGTGGCAGGCTTACCAGTTGAAGACTGTGGCAGAGTTGCAGCGATAATGACACACAGTATTTTACCGTGCTATAAGATAACCTGCCCTACCTGTGCCCAACAATATGCCAACTTGCCAGCCAGTGACTTACTTAAGATATTACACAAGCACGCAAGTGATGGTCTAAATCGATTGGGGGCAGACAAAGATCGCTTTGTGCATGTCAAAAAGTTCTTGACAATCTTAGAGCACTTAACTGAACCGGTTGATCTGAGTCTAGAAATTTTCAATGAAGTATTCAAGTCTATAGGGGAGAAGCAACAATCACCTTTCAAAAACCTGAATATTCTGAATAATTTCTTTTTGAAAGGAAAGGAAAATACAGCTCGTGAATGGCAGGTGGCTCAATTAAGCTTACTTGAATTGGCAAGATTCCAAAAGAACAGAACGGATAATATCAAGAAAGGAGACATCTCGTTCTTTAGGAATAAACTATCTGCAAAAGCAAATTGGAACTTGTATCTGTCATGTGATAACCAGCTGGATAAGAATGCAAACTTCCTGTGGGGACAGAGGGAATATCATGCTAAGCGATTTTTCTCGAACTATTTCGAGGAAATTGATCCAGCGAAGGGCTATTCAGCATACGAAAATCGTTTGCATCCGAATGGGACAAGAAAACTTGCAATTGGAAACCTAATTGTACCACTTGATCTGGCTGAGTTTAGGCGGAAGATGAAAGGTGATTATAAAAGACAGCCAGGGGTGAGTAAGAAGTGCACGAGCTCGAAGGATGGAAACTACGTGTATCCCTGTTGTTGCACTACACTTGATGATGGCTCAGCTGTTGAGTCAACATTTTACCCGCCAACTAAGAAGCACCTCGTAATAGGTAATAGTGGCGACCAAAAGTATGTTGACTTACCAAAAGGGAATTCTGAGATGTTATATATTGCCAGGCAAGGCTTCTGTTACATTAACATTTTTCTCGCGATGTTGATTAACATTAGTGAGGAAGATGCAAAGGATTTCACTAAGAAGGTTCGTGACATGTGTGTGCCAAAGCTTGGAACCTGGCCAACCATGATGGATTTGGCTACAACTTGTGCTCAAATGAAAATATTCTACCCTGATGTTCATGATGCAGAACTGCCTAGAATACTAGTCGATCACGAAACGCAGACATGCCATGTGGTTGACTCGTTTGGCTCACAAACAACTGGGTATCATATTTTGAAAGCATCTAGCGTGTCCCAACTTATTTTGTTTGCTAATGATGAGTTGGAGTCTGACATTAAGCACTATAGAGTTGGTGGTATTCCTGGAGCATGCCCTGAGCTTGGGTCCACAAT-ATCACCTTTTAGAGAAGGAGGAATCATAATGTCTGAGTCAGCAGCGCTAAAACTGCTCCTAAAGGGAATTTTTAGGCCCAAAGTGATGAAGCAATTGCTACTGGATGAACCATATTTGCTCATTTTATCGATATTATCTCCTGGTATACTTATGGCCATGTACAACAATGGGATATTTGAGTTAGCGGTGAAGTTGTGGATCAATGAGAAACAATCTATAGCCATGATAGCATCGTTATTGTCCGCCTTGGCTTTACGAGTGTCAGCAGCAGAAACACTCGTTGCACAGAGGATTATAATTGACACGGCAGCAACAGATCTTCTCGATGCTACGTGTGATGGATTCAACTTACATCTAACATATCCCACTGCACTCATGGTGTTGCAAGTTGTTAAGAACAGAAATGAATGTGATGATACGTTGTTTAAAGCAGGTTTTTCACATTACAACATGAGTGTCGTGCAGATTATGGAAAAAAATTATCTAAGCCTCTTGGGCGATGCTTGGAAAGATTTAACCTGGCGAGAAAAATTATCCGCAACATGGCACTCATACAAAGCAAAGCGCTCTATCACTCAGTTCATAAAACCCATAGGCAAAGCAGATTTAAAAGGGTTGTACAACATATCACCGCAAGCATTCTTGGGTCAGGGCGTACAGAGAGTCAAAGGCACCGCCTCAGGGTTGAATGAGCGACTCAATAATTATATCAATACTAAGTGTGTAAATATTTCATCCTTTTTCATTCGTAGAATTTTCCGGCGCTTGCCAACTTTTGTAACTTTCATTAATTCATTATTAGTTATTAGTATGCTAACTAGTGTAGTAGCAGTGTGTCAAGCAATAATTCTAGATCAAAGGAAGTATAGAAAAGAAATTGAGTTGATGCAGATTGAGAAGAATGAAATTGTTTGTATGGAGTTGTATGCGAGTCTGCAGCGCAAACTTGAGCGTGAATTCACATGGGATGAATATATGGAATATTTGAAATCTGTGAATCCCCAGATAGTTCAATTCGCGCAAGCTCAAATGGAAGAATATAATGTGCGACATCAGCGCTCCACACCAGGTGTTAAGAATTTAGAGCAGGTGGTAGCATTTATAACTCTAATTATCATGATGTTTGATGCTGAAAGGAGCGACTGTGTATTTAAGACTCTCAACAAATTCAAAGGCATCGTTTCTTCAATGGATCATGAAGTTAGACACCAGTCCTTGGATGATGTAATCAAGAATTTCGATGAAAGGAACGAAGTTATTGATTTTGAACTAAATGAGGATACAATTAAAACATCATCAGTGTTGGACACAAAGTTTAGCGACTGGTGGGATCGGCAAATCCAAATGGGACACACACTTCCCCATTATAGAACTGAGGGACACTTCATGGAATTCACAAGGGCAACTGCTGTACAAGTGGCCAACGACATCGCGCATAGTGAGCACCTAGACTTTCTAGTGAGGGGAGCTGTTGGGTCTGGAAAATCTACTGGACTGCCTGTCCATCTCAGTGCAGCTGGATCTGTGCTTTTGATAGAACCAACTCGACCACTTGCAGAAAACGTGTTCAAGCAATTATCCAGTGAACCGTTTTTCAAGAAGCCAACACTGCGCATGCGAGGAAATAGTGTGTTTGGTTCCTCTCCAATCTCCATTATGACTAGCGGCTTTGCGTTGCACTACTATGCTAATAATCGCTCTCAGCTAACTCAGTTTAATTTCATAATTTTTGATGAATGTCATGTTTTAGATCCTTCTGCAATGGCATTTCGTAGCTTGTTAAGTGTGTATCACCAAACATGCAAAGTGTTAAAGGTGTCAGCCACTCCAGTGGGAAGGGAGGTCGAGTTCACAACACAACAACCAGTTAAATTGGTGGTTGAGGATACACTTTCATTCCAATCTTTTGTTGATGCGCAAGGCTCAAAAACCAATGCTGACGTAGTTCAGCATGGTTCGAACATACTCGTGTATGTGTCGAGTTACAATGAAGTGGATACATTAGCCAAGCTTCTAACAGATAGGAATATGATAGTCTCAAAAGTTGATGGCAGAACAATGAAGCACGGATGCTTAGAAATTGTAACGAAAGGGACTAGTGCAAAGCCACATTTTGTCGTAGCAACCAACATTATTGAAAATGGAGTAACTTTAGATATAGATGTAGTTGTAGATTTTGGGCTTAAAGTCTCACCGTTTTTAGATATTGACAATAGGAGCATAGCATACAATAAGATTAGTGTTAGCTATGGAGAAAGAATTCAGAGGTTGGGCCGTGTTGGGCGCTTTAAGAAGGGAGTGGCATTGCGTATTGGACACACCGAAAAGGGAATTATTGAGATTCCAAGTATGATTGCTAGTGAAGCTGCGCTTGCGTGCTTTGCATACAATTTGCCAGTAATGACAGGGGGTGTTTCAACTAGCCTCATTGGCAATTGTACTGTTCGTCAAGTTAAAACTATGCAACAATTTGAGCTGAGTCCATTCTTTATACAAAATTTTGTTGCCCATGATGGATCAATGCATCCTGTCATACATGACATTCTTAAGAAGTATAAACTGCGAGATTGTATGACGCCCTTGTGTGATCAATCCATACCTTACAGAGCCTCAAGCACTTGGTTGTCTGTTAGTGAGTACGAACGACTCGGAGTGGTTTTGGACATTCCAAAACAGATCAAGATTGCATTCCACATCAAGGATATCCCTCCTAAGTTGCATGAAATGCTTTGGGAAACAGTTATCAAATATAAGGATGTTTGTTTGTTTCCAAGTATT-CGGGCTTCATCCATTAGCAAAATTGCATACACACTGCGCACTGATCTTTTTGCAATTCCCAGAACCCTAATTCTAGTTGAAAGATTGCTCGAGGAGGAACGAGTGAAACAGAGTCAATTCAGAAGTCTCATTGATGAAGGATGCTCAAGCATGTTTTCAATTGTTAATTTAACAAACACTCTTAGAGCTAGATATGCAAAGGATTACACTGCAGAAAACATACAGAAGCTCGAGAAAGTGAGGAGTCAGTTAAAGGAGTTCTCAAATTTAAATGGCTCTGCATGCGAGGAGAACTTAATGAAGAGGTATGAATCTCTACAGTTTGTGCATCATCAAGCAACAACTGCACTCGCAAAGGATTTGAAGTTGAAAGGAGTTTGGAAGAAGTCATTAGTTGTGCAGGACTTAATCATAGCGGGTGCCGTTGCTATTGGTGGAATAGGGCTCATCTATAGTTGGTTTACTCAATCAGTTGAAACTGTGTCTCACCAGGGCAAGAACAAATCCAAAAGAATTCAAGCATTGAAGTTTCGACACGCCCGCGATAAGAGGGCTGGTTTTGAAATTGATAACAATGATGATACAATAGAAGAATTCTTTGGATCTGCATACAGGAAGAAGGGAAAAGGTAAAGGCACCACTGTTGGTATGGGCAAGTCAAGCAGGAGGTTTGTTAATATGTATGGATTTGACCCAACAGAATATTCATTCATCCAGTTCGTTGATCCGCTCACTGGAGCTCAAATTGAAGAGAACGTCTATGCTGATATTAGAGACATCCAAGAGCGCTTTAGTGATGTCCGCAAGAAAATGGTAGAGGATGATGAAATCGAATTGCAAGCATTGGGCAGCAACACAATCATTCATGCTTACTTCAGGAAGGATTGGTCTGACAAGGCTCTAAAAATTGATTTGATGCCACACAACCCACTCAAAATCTGTGATAAATCGAATGGCATTGCTAAGTTTCCTGAAAGAGAACTTGAGTTGAGGCAAACTGGGCCAGCAACAGAGGTTGATGTGAAAGACATTCCAAAACAGGAAGTGGAGCATGAAGCCAAATCACTCATGAGAGGTTTAAGGGATTTCAATCCAATTGCTCAAACAGTTTGCAGAGTAAAAGTGTCTGTTGAATATGGAACGTCTGAAATGTATGGGTTCGGTTTTGGTGCGTATATTATAGTAAACCACCATCTATTCAAGAGTTTCAATGGATCCATGGAAGTGCGATCAATGCATGGAACATTCAGAGTGAAGAATTTGCATAGCCTGAGCGTTTTACCGATCAAAGGCAGAGACATTATCATCATAAAGATGCCAAAGGATTTCCCTGTTTTCCCACAAAAACTGCACTTCCGAGCTCCAGTGCAGAATGAGAGGATTTGTTTGGTTGGAACTAATTTTCAAGAAAAACATGCATCATCAATCATCACAGAAACGAGTACTACATACAATGTACCGGGCAGCACTTTTTGGAAGCATTGGATTGAAACAAATGATGGGCATTGTGGATTACCAGTAGTGAGTACAGCTGATGGATGTCTAGTTGGAATACACAGCTTGGCGAATAATGTGCAAACCACGAATTATTATTCAGCCTTTGATGAGGATTTTGAAAGTAAGTATCTCCGAACTGATGAGCATAATGAGTGGACCAAATCGTGGGTATATAACCCAGATACTGTGTTGTGGGGTCCATTGAAGCTCAAAGAGAGTACCCCTAAAGGCCTGTTTAAGACAACAAAACTTGTACAGGATTTAAT------TGATCATGATGTTGTTGTAGAGCAAGCTAAACATTCTGCGTGGATGTATGAGGCTCTAACAGGGAATTTGCAAGCTGTGGCGACAATGAAGAGTCAGCTAGTGACAAAGCACGTGGTCAAAGGGGAGTGTCGGCACTTCAAAGAGTTCTTAACTGTGGATTCGGAAGCAGAAGCT------TTCTTCAGGCCTTTGATGGATGCTTATGGGAAGAGCTTGTTAAATAGAGAAGCATATATAAAGGACATAATGAAATACTCAAAGCCTATTGATGTTGGAATAGTAGACTGTGAT--GCTTTTGAAGAGGCTATCAATAGGGTTATCATTTATCTGCAA-GTACATGGCTTCCAGAAATGCAATTACATCACCGATGAGCAGGAAATTTTCAAAGCTCTCAATATGAAAGCTGCTGTCGGGGCTATGTATGGAGGCAAGAAGAAAGACTACTTCGAGCATTTTACTGAGGCGGATAAAGAGGAAATTGTTATGCAAAGTTGCTTACGATTGTACAAGGGCTCACTTGGCATATGGAATGGATCATTGAAAGCAGAACTTCGGTGCAAAGAGAAGATACTTGCAAATAAGACAAGGACATTCACTGCTGCACCTTTAGATACTCTACTGGGTGGGAAGGTGTGCGTTGATGATTTTAATAATCAATTCTACTCAAAGAACATTGAATGCTGCTGGACTGTTGGAATGACTAAGTTTTATGGAGGTTGGGACAAATTGCTTCGGCGTCTACCTGAAAATT---GGGTGTACTGCGATGCCGATGGTTCACAATTCGATAGTTCACTCACCCCATACCTAATTAATGCTGTTCTCATCATCAGAAGCACATACATGGAAGATTGGGACTTGGGGTTGCAAATGTTGCGCAATTTGTACACAGAAATAATTTACACACCAATCTCAACTCCAGATGGAACAATTGTCAAGAAGTTTAGAGGTAATAATAGCGGTCAACCTTCTACCGTTGTGGATAATTCTCTCATGGTTGTTCTTGCTATGCATTACGCTCTCATTAAGGAGTGCGTTGAGTTTGAAGAAATCGACAGCACGTGTGTATTCTTTGTTAATGGTGATGACTTATTGATTGCTGTGAATCCGGAGAAAGAGAGCATTCTCGATAGAATGTCACAACATTTCTCAGATCTTGGTTTGAACTATGATTTTTCGTCGAGAACAAGAAGGAAGGAGGAATTGTGGTTCATGTCCCATAGAGGCCTGCTAATTGAGGGTATGTACGTGCCAAAGCTTGAAGAAGAGAGAATTGTATCCATTCTGCAATGGGATAGGGCTGATCTGCCAGAGCACAGATTAGAAGCGATTTGTGCAGCAATGATAGAATCCTGGGGTTATTTTGAGTTAACGCACCAAATTAGGAGATTCTACTCATGGTTGTTACAACAGCAACCTTTTTCAACGATAGCACAGGAAGGAAAAGCTCCATACATAGCGAGCATGGCATTGAAGAAGCTGTACATGAATAGGACAGTAGATGAGGAGGAACTGAAGGCTTTCACTGAAATGATG?GTTGCCTTGGATGACGAATTTGAGTGCGATACTTATGAAGTGCACCATCAAGGAAAT---------GACACAATCGATGCAGGAGGAAGCACTAAGAAGGATGCAAAACAAGAGCAAGGTAGCATTCAACCAAATCTCAACAAGGAAAAG---------------------------GAAAAGGACGTGAATGTTGGAACATCTGGAACTCATACTGTGCCACGAATTAAAGCTATCACGTCCAAAATGAGAATGCCTAAGAGTAAAGGTGCAACTGTACTAAATTTGGAACACTTACTCGAGTATGCTCCACAGCAAATTGACATCTCAAATACTCGAGCAACTCAATCACAGTTTGATACGTGGTATGAAGCAGTACAACTTGCATACGACATAGGAGAAACTGAAATGCCAACTGTGATGAATGGGCTTATGGTTTGGTGCATTGAAAATGGAACCTCGCCAAACATCAACGGAGTTTGGGTTATGATGGATGGAGATGAACAAGTCGAATACCCACTGAAACCAATCGTTGAGAATGCAAAACCAACACTTAGGCAAATCATGGCACATTTCTCAGATGTTGCAGAAGCGTATATAGAAATGCGCAACAAAAAGGAACCATATATGCCACGATATGGTTTAGTTCGTAATCTGCGCGATGGAAGTCTGGCTCGCTATGCTTTTGACTTTTATGAAGTTACATCACGGACACCAGTGAGGGCTAGAGAGGCACACATTCAAATGAAGGCCGCAGCTTTAAAATCAGCTCAATCTCGACTTTTCGGATTGGATGGTGGCATTAGTACACAAGAGGAAAACACAGAGAGGCACACCACCGAGGATGTTTCTCCAAGTATGCATACTCTACTTGGAGTGAAGAACATGTGATTGTAGTGTCTTTCCGGACGATATATAGATATTTATG-TTTGCAGTAAGTATTTTGGCTTTTCCTGTACTACTTTTATCGAAATTAATAATC?GTTTGAATATTACTGGCAGATAGGGGTGGTATAGCGATTCCGTCGTTGT-AGTGACCTTAGCTGTCGTTTCTGTATTATT-------------------------------------------------------------------------------------------------------------------------------------------------------------------------------------------------------------------------------------ATGTTT?GTATAAAAGTGCCGGGTTGTTGTTGTTGTGGCTGATCTATCGATTAGGTGATGTTGCGATTT?GTCGTAGCAGTGACTATGTCTGGAT-TTAGTTACTTGGGTGATGTTGTGATTCTGTCATAGCAGTGACTGTAAACTTCAATCAGGAGAC
	SCRI_N       ?????????????????????????????AAATCAACGCAAAAACACTCACAAAAGCTTTCAACTCTAATTCAAACAATTTGTTAAGTTTCAATTTCGATCTTCATCAAACAAACTCTTTCAATTTCAGTGTAAGCTATCGTAATTCAGTAAGTTATTTCAAACTCTCGTAAATTGCAGAAGATCATCCATGGCAACTTACACATCAACAATCCAGTTTGGTTCCATTGAATGCAAACTTCCATACTCACCCGCTCCTTTTGGGCTAGTTGCGGGGAAACGAGAAGTTTCAACC-------------------------------------------------------------------------------------------------------------------------------------------------------------------------------------------------------------------------------------------------------------------------------------------------------------------------------------------------------------------------------------------------------------------------------------------------------------------------------------------------------------------------------------------------------------------------------------------------------------------------------------------------------------------------------------------------------------------ACCACTGACCCCTTCGCAAGTTTGGAGATGCAGCTTAGTGCGCGATTAAGAAGGCAAGAGTTTGCAACTATTCGAACATCCAAGAATGGTACTTGCATGTATCGATACAAGACTGATGTCCAGATTGCGCGCATTCAAAAGAAGCGCGAGGAAAGAGAAAGAGAGGAATATAATTTCCAAATGGCTGCGTCAAGTGTTGTGTCGAAGATCACTATTGCTGGTGGAGAGCCACCTTCAAAACTTGAATCACAAGTGCGGAAGGGTGTCATTCACACAACTTCAAGGATGCGCACAGCAAAAACATATCACACGCCAAAGTTGACAGAGGGACAAATGAACCACCTTATCAAGCAGGTGAAGCAAATTATGTCAACCAAAGGAGGGTCTGTTCAACTGATTAGCAAGAAAAGTACCCATGTTCACTATAAAGAAGTTTTGGGATCACATAGCGCAGTTGTTTGCACTGCA?CATATGAGAGGTTTACGAAAGAGAGTGGACTTTCGGTGTGATAAATGGACCGTTGTGCGTCTGCAGCATCTCGCCAGGACGGACAAGTGGACTAACCAAGTTCGTGCTACTGATCTACGCAAGGGCGATAGTGGAGTTATATTGAGTAATACTAATCTCAAAGGAAACTTTGGGAGAAGCTCGGAGGGCCTATTCATAGTGCGTGGGTCGCACGAAGGAAAAATCTATGATGCACGTTCCAAGGTTACTCAAGGGGTTATGGATTCAATGATTCAGTTCTCAAGCGCTGAAAGCTTTTGGAAGGGATTGGACGGCAATTGGGCACAAATGAGATATCCTACAGATCATACATGTGTGGCAGGCTTACCAGTTGAAGACTGTGGCAGAGTTGCAGCGATAATGACACACAGTATTTTACCGTGCTATAAGATAACTTGCCCTACCTGTGCCCAACAATATGCCAACTTGCCAGCCGGTGACTTACTTAAGATATTACACAAGCACGCAAGTGATGGTCTAAATCGATTGGGGGCAGACAAAGATCGCTTTGTGCATGTCAAAAAGTTCTTGACAATCTTAGAGCACTTAACTGAACCGGTTGATCTGAGTCTAGAAATTTTCAATGAAGTATTCAAGTCTATAGGGGAGAAGCAACAATCACCTTTCAAAAACCTGAATATTCTGAATAATTTCTTTTTGAAAGGAAAGGAAAATACAGCTCGTGAATGGCAGGTGGCTCAATTAAGCTTACTTGAATTGGCAAGATTCCAAAAGAACAGAACGGATAATATCAAGAAAGGAGACATCTCGTTCTTTAGGAACAAACTATCTGCCAAAGCAAATTGGAACTTGTATCTGTCATGTGATAACCAGCTGGATAAGAATGCAAACTTCCTGTGGGGACAGAGGGAATATCATGCTAAGCGATTTTTCTCGAACTATTTCGAGGAAATTGATCCAGCGAAGGGCTATTCAGCATACGAAAATCGTTTGCATCCGAATGGGACAAGAAAACTTGCAATTGGAAACCTAATTGTACCACTTGATCTGGCTGAGTTTAGGCGGAAGATGAAAGGTGATTATAAAAGACAGCCAGGGGTGAGTAAGAAGTGCACGAGCTCGAAGGATGGAAACTACGTGTATCCCTGTTGTTGCACTACACTTGATGATGGCTCAGCTGTTGAATCAACATTTTACCCGCCAACTAAGAAGCACCTCGTAATAGGTAATAGTGGCGACCAAAAGTATGTTGACTTACCAAAAGGGAATTCTGAGATGTTATATATTGCCAGGCAAGGCTTCTGTTACATTAACATTTTCCTCGCGATGTTGATTAACATTAGTGAGGAAGATGCAAAGGATTTCACTAAGAAGGTTCGTGACATGTGTGTGCCAAAGCTTGGAACCTGGCCAACCATGATGGATCTGGCTACAACTTGTGCTCAAATGAAAATATTCTACCCTGATGTTCATGATGCAGAACTGCCTAGAATACTAGTCGATCACGAAACGCAGACATGCCATGTGGTTGACTCGTTTGGCTCACAAACAACTGGGTATCATATTTTGAAAGCATCTAGCGTGTCCCAACTTATTTTGTTTGCTAATGATGAGTTGGAGTCTGACATTAAGCACTATAGAGTTGGTGGTATTCCTGGAGCATGCCCTGAGCTTGGATCCACAAT-ATCACCTTTTAGAGAAGGAGGAATCATAATGTCTGAGTCAGCAGCGCTAAAACTGCTCCTAAAGGGAATTTTTAGGCCCAAAGTGATGAAGCAATTGCTACTGGATGAACCATATTTGCTCATTTTATCGATATTATCTCCTGGTATACTTATGGCTATGTACAACAATGGGATATTTGAGTTAGCGGTGAAGTTGTGGATCAATGAGAAACAATCTATAGCCATGATAGCATCGTTATTGTCCGCCTTGGCTTTACGAGTGTCAGCAGCAGAAACACTCGTTGCACAGAGGATTATAATTGACACGGCAGCAACAGATCTTCTCGATGCTACGTGTGATGGATTCAATTTAAATCTGACATATCCCACTGCACTCATGGTGTTGCAAGTTGTTAAGAACAGAAATGAATGTGATGATACGTTGTTTAAAGCAGGTTTTTCACATTACAACATGAGTGTCGTGCAGATTATGGAAAAAAATTATCTAAGCCTCTTGGGCGATGCCTGGAAAGATTTAACCTGGCGAGAAAAATTATCCGCAACATGGCACTCATACAAAGCAAAGCGCTCTATCACTCAGTTCATAAAACCCATAGGCAAAGCAGATTTAAAAGGGTTGTACAACATATCACCGCAAGCATTCTTGGGTCAGGGCGTACAGAGAGTCAAAGGCACCGCCTCAGGGTTGAATGAGCGACTCAATAATTATATCAATACTAAGTGTGTAAATATTTCATCCTTTTTCATTCGTAGAATTTTCCGGCGCTTGCCAACTTTTGTAACTTTCATTAATTCATTATTAGTTATTAGTATGCTAACTAGTGTAGTAGCAGTGTGTCAAGCAATAATTTTAGATCAAAGGAAGTATAGAAAAGAAATTGAGTTGATGCAGATTGAGAAGAATGAAATTGTTTGTATGGAGTTGTATGCGAGTCTGCAGCGCAAACTTGAGCGTGAATTCACATGGGATGAATATATGGAATATTTGAAATCTGTGGATCCCCAGATAGTTCAATTCGCGCAAGCTCAAATGGAAGAATATAATGTGCGACATCAGCGCTCCACACCAGGTGTTAAAAATTTAGAGCAGGTGGTAGCATTTATAACTCTAATTATCATGATGTTTGATGCTGAAAGGAGCGACTGTGTATTTAAAACTCTCAACAAATTCAAAGGCATCGTTTCTTCAATGGATCATGAAGTTAGACACCAGTCCTTGGATGATGTAATCAAGAATTTCGATGAAAGGAACGAAGTTATTGATTTTGAGCTAAATGAGGATACAATTAAAACATCATCAGTGTTGGACACGAAGTTTAGCGACTGGTGGGATCGGCAAATCCAAATGGGACACACACTTCCCCATTATAGAACTGAGGGACACTTCATGGAATTCACAAGGGCAACTGCTGTACAAGTGGCCAACGACATCGCGCATAGTGAGCACCTAGACTTTCTAGTGAGGGGAGCTGTTGGGTCTGGAAAATCTACTGGACTGCCTGTCCATCTCAGTGCAGCTGGATCCGTGCTTTTGATAGAACCAACTCGACCACTTGCAGAAAACGTGTTCAAGCAATTATCCAGTGAACCGTTTTTCAAGAAGCCAACACTGCGCATGCGAGGAAATAGTGTGTTTGGTTCCTCTCCAATCTCCATCATGACTAGCGGCTTTGCGTTGCACTACTATGCTAATAATCGCTCTCAGCTAACTCAGTTTAATTTCATAATTTTTGATGAATGTCATGTTTTAGATCCTTCTGCAATGGCATTTCGTAGCTTGTTAAGTGTGTATCACCAAACATGCAAAGTGTTAAAGGTGTCAGCCACTCCAGTGGGAAGGGAGGTCGAGTTCACAACACAACAACCAGTTAAATTGGTGGTTGAGGATACACTTTCATTCCAATCTTTTGTTGATGCGCAAGGCTCAAAAACCAATGCCGACGTTGTTCAGCATGGTTCGAACATACTCGTGTATGTGTCGAGTTACAATGAAGTGGATACATTAGCCAAGCTTCTAACAGATAGGAATATGGTAGTCTCAAAAGTTGATGGCAGAACAATGAAGCACGGATGCTTAGAAATTGTAACAAAAGGAACTAGTGCAAAGCCACATTTTGTCGTAGCAACCAACATTATTGAAAATGGAGTAACTTTAGATATAGATGTAGTTGTAGATTTTGGGCTTAAAGTCTCACCGTTTTTAGATATTGACAATAGGAGCATTGCATACAATAAGATTAGTGTTAGCTATGGAGAAAGAATTCAGAGGTTGGGCCGTGTTGGGCGCTTTAAGAAGGGAGTGGCATTGCGTATTGGACACACCGAAAAGGGAATTATTGAGATTCCAAGTATGATTGCTAGTGAAGCTGCGCTTGCGTGCTTTGCATACAATTTGCCAGTAATGACAGGGGGTGTTTCAACTAGCCTCATTGGCAATTGTACTGTTCGTCAAGTTAAAACTATGCAACAATTTGAGCTGAGTCCATTCTTTATACAAAATTTTGTTGCCCATGATGGATCAATGCATCCTGTCATACATGACATTCTTAAGAAGTATAAACTGCGAGATTGTATGACGCCCTTGTGTGATCAATCCATACCTTACAGAGCCTCAAGCACTTGGTTGTCTGTTAGTGAGTACGAACGACTCGGAGTGGTTTTGGACATTCCAAAACAGATCAAGATTGCATTCCACATCAAGGACATCCCTCCTAAGTTGCATGAAATGCTTTGGGAAACAGTTATCAAATATAAGGATGTTTGTTTGTTTCCAAGTATT-CGGGCTTCATCCATTAGCAAAATTGCATACACACTGCGCACTGATCTTTTTGCAATTCCCAGAACCCTAATTCTAGTTGAAAGATTGCTCGAGGAGGAACGAGTGAAACAGAGTCAATTCAGAAGTCTCATTGATGAAGGATGCTCAAGCATGTTTTCAATTGTTAATTTAACAAACACTCTTAGAGCTAGATATGCAAAGGATTACACTGCAGAAAACATACAGAAGCTCGAGAAAGTGAGGAGTCAGTTAAAGGAGTTCTCAAATTTAAATGGCTCTGCATGTGAGGAGAACTTAATGAAGAGGTATGAATCTCTACAGTTTGTGCATCATCAAGCAACAACTTCACTCGCAAAGGATTTGAAGTTGAAAGGAGTTTGGAAGAACTCATTAGTTGTGCAGGACTTACTCATAGCGGGTGCCGTTGCTATTGGTGGAATAGGGCTCATCTATAGTTGGTTTACTCAATCAGTTGAAACTGTGTCTCACCAGGGCAAGAACAAATCCAAAAGAATTCAAGCATTGAAGTTTCGACACGCCCGCGATAAGAGGGCTGGCTTTGAAATTGATAACAATGATGATACAATAGAAGAATTCTTTGGATCTGCATACAGGAAAAAGGGAAAAGGTAAAGGCACCACTGTTGGTATGGGCAAGTCAAGCAGGAGGTTTGTTAATATGTATGGATTTGACCCAACAGAATATTCATTTATCCAGTTCGTTGATCCGCTCACTGGAGCTCAAATTGAAGAGAACGTCTATGCTGATATTAGAGATATCCAAGAGCGCTTTAGTGATGTCCGCAAGAAAATGGTAGAGGATGATGAAATCGAATTGCAAGCATTGGGCAGCAACACAACCATTCATGCTTACTTCAGGAAAGATTGGTCTGACAAGGCTCTAAAAATTGATTTGATGCCACACAACCCACTCAAAATCTGTGATAAATCGAATGGCATTGCTAAGTTTCCTGAAAGAGAACTTGAGTTGAGGCAAACTGGGCCAGCAATAGAGGTTGATGTGAAAGACATTCCAAAACAGGAAGTGGAGCATGAAGCTAAATCACTCATGAAAGGTCCAAGGGATTTCAATCCAATTGCTCAAACAGTTTGCAGAGTAAAAGTGTCTGTTGAATATGGAACGTCTGAAATGTATGGGTTCGGTTTTGGGGCGTATATTATAGTAAACCACCATCTATTCAAGAGTTTCAATGGATCCATGGAAGTGCGATCAATGCATGGAACATTCAGAGTGAAGAATTTGCATAGCTTGAGCGTTTTACCGATCAAAGGCAGAGACATTATCATCATAAAGATGCCAAAGGATTTCCCTGTTTTCCCACAAAAACTGCACTTCCGAGCTCCAGTGCAGAATGAGAGGATTTGTTTGGTTGGAACTAATTTTCAAGAAAAACATGCATCATCAATCATCACAGAAACGAGTACTACATACAATGTACCGGGCAGCACTTTTTGGAAGCATTGGATTGAAACAAATGATGGGCATTGTGGATTACCAGTAGTGAGTACAGCTGATGGATGTCTAGTTGGAATACACAGCTTGGCGAATAATGTGCAAACCACGAATTATTATTCAGCCTTTGATGAGGATTTTGAAAGTAAGTATCTCCGAACTAATGAGCATAATGAGTGGACCAAATCGTGGGTATATAACCCAGATACTGTGTTGTGGGGTCCATTGAAGCTCAAGGAGAGTACCCCTAAAGGCCTGTTTAAGACAACAAAACTTGTGCAGGATTTAAT------CGATCATGATGTTGTTGTAGAGCAAGCTAAACATTCTGCGTGGATGTATGAGGCTCTAACAGGGAATTTGCAAGCTGTGGCGACAATGAAGAGTCAGCTAGTGACAAAGCACGTGGTCAAAGGGGAGTGTCGGCATTTCAAAGAGTTCTTAACTGTGGATTCGGAAGCAGAAGCT------TTCTTCAGGCCTTTGATGGATGCTTATGGGAAGAGCTTGTTAAATAGAAAAGCATATATAAAGGACATAATGAAATACTCAAAGCCTATTGATGTTGGAATAGTAGACTGTGAT--GCTTTTGAAGAGGCTATCAATAGGGTTATCATTTATCTGCAA-GTGCATGGCTTCCAGAAATGCAATTACATCACCGATGAGCAGGAAATTTTCAAAGCTCTCAATATGAAAGCTGCTGTCGGAGCTATGTATGGAGGCAAGAAGAAAGACTACTTCGAGCATTTTACTGAGGCGGATAAAGAGGAAATTGTTATGCAAAGTTGCTTTCGATTGTACAAGGGCTCGCTTGGCATATGGAATGGATCATTGAAAGCAGAACTTCGGTGCAAAGAGAAGATACTTGCAAATAAGACAAGGACATTCACTGCTGCACCTTTAGATACTCTACTGGGTGGAAAGGTGTGCGTTGATGATTTTAATAATCAATTCTACTCAAAGAACATTGAATGCTGCTGGACTGTTGGAATGACTAAGTTTTATGGAGGTTGGGACAAATTGCTTCGGCGTCTACCTGAAAATT---GGGTGTACTGCGATGCCGATGGTTCACAATTCGATAGTTCACTCACCCCATACCTAATTAATGCTGTTCTCATCATCAGAAGCACATACATGGAAGATTGGGACTTGGGGTTGCAAATGCTGCGCAATTTATACACAGAAATAATTTACACACCAATCTCAACTCCAGATGGAACAATTGTCAAGAAGTTCAGAGGAAATAACAGCGGTCAACCTTCTACCGTTGTGGACAACTCTCTTATGGTCGTCCTTGCCATGCACTATGCTCTCATCAAAGAATGCATTGAGTTTGACGAGATTGACAGCACGTGCGTGTTCTTTGTCAATGGTGATGATTTGCTGATTGCTGTGAATCCGGAGAAAGAGGGCATTCTTGACAGATTGTCACAACACTTCTCAGATCTTGGTTTGAATTATGATTTCTCGTCAAGAACAAGAAATAAGGAAGAGTTGTGGTTTATGTCTCATAGAGGCCTACTGATTGAGGGCATGTACGTACCGAAACTTGAAGAAGAAAGGATTGTGTCCATTCTCCAATGGGACAGAGCAGACTTGGCTGAACACAGGCTTGAGGCGATTTGCGCAGCTATGATAGAGTCCTGGGGTTATTTTGAGTTAACGCACCAAATCAGGAGATTCTACTCATGGTTGTTGCAACAGCAACCTTTTTCAACGATAGCACAGGAAGGAAAAGCTCCATACATAGCGAGCATGGCATTGAAGAAGCTGTACATGAATAGGACAGTAGATGAGGAGGAACTGAAGGCTTTCACTGAAATGATG?GTTGCCTTGGATGATGAATTTGAGTGCGATACTTATGAAGTGCACCATCAAGGAAAT---------GACACAATCGATGCAGGAGGAAGCACTAAGAAGGATGCAAAACAAGAGCAAGGTAGCATTCAACCAAATCTCAACAAGGAAAAG---------------------------GAAAAGGACGTGAATGTTGGAACATCTGGAACTCATACTGTGCCACGAATTAAAGCTATCACGTCCAAAATGAGAATGCCCAAGAGTAAAGGTGCAACTGTACTAAATTTGGAACACTTACTCGAGTATGCTCCACAGCAAATTGACATCTCAAATACTCGAGCAACTCAATCACAGTTTGATACGTGGTATGAAGCAGTACAACTTGCATACGACATAGGAGAAACTGAAATGCCAACTGTGATGAATGGGCTTATGGTTTGGTGCATTGTAAATGGAACCTCGCCAAACATCAACGGAGTTTGGGTTATGATGGATGGAGATGAACAAGTCGAATACCCACTGAAACCAATCGTTGAGAATGCAAAACCAACACTTAGGCAAATCATGGCACATTTCTCAGATGTTGCAGAAGCGTATATAGAAATGCGCAACAAAAAGGAACCATATATGCCACGATATGGTTTAATTCGAAATCTGCGCGATGGAAGTTTGGCTCGCTATGCTTTTGACTTTTATGAAGTTACATCACGGACACCAGTGAGGGCTAGAGAGGCACACATTCAAATGAAGGCCGCAGCTTTAAAATCAGCTCAATCTCGACTTTTCGGATTGGATGGTGGCATTAGTACACAAGAGGAAAACACAGAGAGGCACACCACCGAGGATGTTTCTCCAAGTATGCATACTCTACTTGGAGTCAAGAACATGTGATTGTAGTGTCTTTCCGGACGATATATAGATATTTATG-TTTGCAGTAAGTATTTTGGCTTTTCCTGTACTACTTTTATCGAAATTAATAATC?GTTTGAATATTACTGGCAGATAGGGGTGGTATAGCGATTCCGTCGTTGT-AGTGACCTTAGCTGTCGTTTCTGTATTATT-------------------------------------------------------------------------------------------------------------------------------------------------------------------------------------------------------------------------------------ATGT?TTGTATAAAAGTGCCGGGTTGTTGTTGTTGTGGCTGATCTATCGATTAGGTGATGTTGCGATTTTGTCGTAGCAGTGACTATGTCTGGA?TTTAGTTACTTGGGTGATGCTGTGATTCTGTCATAGCAGTGACTG???????????????????
	NE_11        ?AATTAAAACAACTCAATACAACATAAGAAAAACAACGCAAAAACACTCACAAAAGCTTTCAACTCTAATTCAAACAATTTGTTAAGTTTCAATTTCGATTTTCATCAAACAAACTCTTTCAATTTCAGTGTAAGCTATCGCAATTCAGTAAGTTATTTCAAACTCTCGTAAATTGCAGAAGATCATCAATGGCAACTTACACATCAACAATCCAGTTTGGTTCCATTGAATGCAAACTTCCATACTCACCCGCTCCTTTTGGGCTAGTTGCGGGGAAACGAGAAGTTTCAACC-------------------------------------------------------------------------------------------------------------------------------------------------------------------------------------------------------------------------------------------------------------------------------------------------------------------------------------------------------------------------------------------------------------------------------------------------------------------------------------------------------------------------------------------------------------------------------------------------------------------------------------------------------------------------------------------------------------------ACCACTGACCCCTTCGCAAGCTTGGAGATGCAGCTTAGTGCGCGATTACGAAGGCAAGAGTTCGCAACCATTCGAACATCCAAGAATGGTACTTGCATGTATCGATACAAGACTGATGTCCAGATTGCGCGCATTCAAAAGAAGCGCGAGGAAAGAGAAAGAGAGGAATATAATTTCCAAATGGCTGCGTCAAGTGTTGTGTCGAAGATTACTATTGCTGGTGGAGAGCCACCTTCAAAACTTGAATCACAAGTGCGGAGGGGTGTCATCCACACAACTCCAAGGATGCGCACAGCAAAAACATATCACACGCCAAAGTTGACAGAGGGACAAATGAACCACCTTATCAAGCAGGTGAAGCAAATTATGTCAACCAAAGGAGGGTCTGTTCAACTGATTAGCAAGAAAAGTACCCATGTTCACTACAAAGAAGTTTTAGGATCACATCGCGCAGTCGTTTGCACTGCA?CATATGAGAGGTTTACGAAAGAGAGTGGACTTTCGGTGTGATAAATGGACCGTTGTGCGTCTACAGCATCTCGCCAGGACGGACAAGTGGACTAACCAAGTTCGTGCTACTGATCTACGCAAGGGCGATAGTGGAGTTATATTGAGTAATACTAATCTCAAAGGAAACTTTGGGAGAAGCTCGGAGGGCCTATTCATAGTGCGTGGGTCGCACGAAGGAAAAATCTATGATGCACGTTCCAAGGTTACTCAAGGGGTTATGGATTCAATGGTTCAGTTCTCAAGCGCTGAAAGCTTTTGGAAGGGATTGGACGGCAATTGGGCACAAATGAGATATCCTACAGATCATACATGTGTGGCAGGCTTACCAGTTGAAGACTGTGGCAGAGTTGCAGCGATAATGACACACAGTATTTTACCGTGCTATAAGATAACCTGCCCCACCTGTGCCCAACAATATGCCAACTTGCCAGCCAGTGACTTACTTAAGATATTACACAAGCACGCAAGTGATGGTTTAAATCGATTGGGGGCGGACAAAGATCGCTTTGTGCATGTCAAAAAGTTCTTGACAATCTTAGAGCACCTAACTGAACCGGTTGATCTGAGTCTAGAAATTTTCAATGAAGTATTCAAGTCTATAGGGGAGAAGCAACAATCACCTTTCAAAAACCTGAATATTCTGAATAATTTCTTTTTGAAAGGAAAGGAAAATACAGCTCGCGAATGGCAGGTGGCTCAATTAAGCTTACTTGAATTGGCGAGATTCCAAAAGAACAGAACGGATAACATCAAGAAAGGCGACATCTCGTTCTTTAGGAATAAACTATCTGCCAAAGCAAATTGGAACTTGTATCTGTCATGTGATAACCAGCTGGATAAGAATGCAAACTTCCTGTGGGGACAGAGGGAATATCATGCTAAGCGATTTTTCTCGAACTATTTCGAGGAAATTGATCCAGCAAAGGGCTATTCAGCATACGAAAATCGTTTGCATCCGAATGGGACAAGAAAGCTTGCAATTGGAAACTTAATTGTTCCACTTGATCTGGCTGAATTTAGGCGGAAGATGAAAGGTGATTATAAAAGACAGCCAGGGGTGAGTAAGAAGTGCACGAGCTCGAAGGATGGAAACTACGTGTATCCCTGTTGTTGCACTACACTTGATGATGGCTCAGCTGTTGAATCAACATTTTACCCGCCAACTAAGAAGCACCTCGTAATAGGTAATAGTGGCGACCAAAAGTATGTTGATCTTCCAAAAGGGAATTCTGAAATGTTATACATTGCCAGGCAAGGGTTTTGTTATATTAATATATTCCTTGCGATGTTGATTAACATTAGTGAAGAAGATGCAAAGGATTTCACGAAGAAGGTTCGTGACATGTGTGTGCCAAAGCTTGGAACCTGGCCAACCATGATGGATCTGGCTACTACTTGTGCTCAAATGAAAATATTTTACCCTGATGTTCATGATGCAGAGCTGCCCAGAATACTAGTCGACCATGAAACTCAGACATGTCATGTGGTCGACTCGTTTGGTTCGCAAACAACTGGTTATCATATTTTAAAGGCATCTAGCGTGTCTCAGCTTATCTTGTTTGCAAACGACGAGTTGGAATCTGACATTAAGCACTATAGAGTTGGTGGTATTCCTGGGGCATGTCCTGAGCTCGGATCCACGAT-ATCACCTTTCAGAGAAGGAGGAATCATAATGTCTGAGTCAGCAGCGCTGAAACTGCTTTTAAAGGGTATCTTTAGACCCAAGGTGATGAGGCAGTTACTATTAGATGAACCATATCTGCTCATTCTTTCGATTTTGTCCCCTGGTATACTCATGGCTATGTACAATAATGGGATTTTTGAGCTTGCAGTGAAGTTGTGGATTAATGAAAAGCAATCTATAGCCATGATAGCATCGTTGTTGTCCGCCTTAGCTTTACGAGTGTCAGCAGCAGAAACACTTGTTGCACAGAGGATTATAATTGACACGGCAGCAACAGATCTTCTTGATGCTACGTGTGATGGGTTCAATTTAAATCTGACATATCCCACTGCACTCATGGTGTTGCAAGTTGTTAAGAATAGAAATGAATGTGATGATACGTTGTTCAAGGCAGGTTTTTCACATTACAACACGAGTGTCGTGCAGATTATGGAAAAAAATTATCTAAGCCTCTTGGGCGATGCCTGGAAAGATTTAACCTGGCGAGAAAAATTATCCGCAACATGGCACTCATACAAAGCAAAGCGCTCTATCACTCAGTTCATAAAACCCATAGGCAAAGCAGATTTAAAAGGGTTGTACAACATATCACCACAAGCATTCTTGGGTCAGAGCGTACAGAGGGTCAAAGGCACCGCCTCAGGGTTGAATGAGCGACTCAACAATTATATTAATACTAAGTGTGTAAATATTTCATCCTTTTTCATTCGTAGAATTTTCCGGCGCTTGCCAACTTTTGTAACTTTCATTAATTCATTATTAGTCATTAGTATGCTAACTAGTGTAGTAGCAGTGTGTCAAGCAATAATTCTAGATCAAAGGAAGTACAGAAAAGAAATTGAGTTGATGCAGATTGAGAAGAATGAAATTGTTTGTATGGAGTTGTATGCGAGTCTGCAGCGCAAACTTGAGCGTGAATTCACATGGGATGAATATATAGAATATTTGAAGTCTGTGAATCCCCAGATAGTTCAATTCGCGCAAGCTCAAATGGAGGAGTATAATGTGCGACATCAGCGCTCCACACCAGGTGTTAAGAATTTAGAGCAGGTGGTAGCATTTATAACTCTAATTATCATGATGTTTGATGCTGAAAGGAGCGACTGTGTATTTAAGACTCTCAACAAATTCAAGGGCATCGTTTCTTCAATGGATCATGAAGTTAGACACCAGTCCTTGGATGATGTAATCAAGAATTTCGATGAAAGGAACGAAGTTATTGATTTTGAGCTAAATGAGGATACAATTAAAACATCATCAGTGTTGGACACAAAGTTTAGCGACTGGTGGGATCGGCAAATCCAAATGGGACACACACTTCCCCACTATAGAACTGAGGGACACTTCATGGAATTCACAAGGGCAACTGCTGTACAAGTGGCCAACGACATCGCGCATAGTGAGCACCTAGATTTTCTAGTGCGGGGAGCTGTTGGGTCTGGAAAATCTACTGGACTGCCTGTTCATCTCAGTGCAGCTGGATCCGTGCTTTTGATAGAACCAACTCGACCACTTGCAGAAAACGTGTTCAAGCAATTATCCAGTGAACCGTTTTTCAAGAAGCCAACACTGCGCATGCGAGGGAATAGTGTGTTTGGTTCCTCTCCAATCTCCATCATGACTAGCGGCTTTGCGTTGCACTACTATGCTAATAATCGCTCTCAGCTAACTCAGTTTAATTTCATAATCTTTGATGAATGTCATGTTTTAGATCCTTCTGCAATGGCATTTCGTAGCTTGCTAAGTGTGTATCACCAAACATGCAAAGTGTTAAAGGTGTCAGCCACTCCAGTGGGAAGGGAGGTCGAATTCACAACACAACAACCAGTTAAGTTGGTGGTTGAGGATACACTTTCATTTCAATCTTTTGTTGATGCGCAAGGCTCAAAAACCAATGCCGACGTTGTTCAGCATGGTTCGAACATACTCGTGTATGTGTCGAGTTACAATGAAGTGGATACATTAGCCAAGCTTCTAACAGATAGGAATATGGTTGTCTCGAAAGTTGATGGCAGAACAATGAAGCATGGATGCTTAGAAATTGTAACAAAAGGGACTAGTGCAAAGCCACATTTTGTCGTTGCAACCAATATTATTGAGAATGGAGTAACTTTAGATATAGATGTAGTTGTAGATTTTGGGCTTAAAGTCTCACCGTTTTTAGATATTGACAATAGGAGCATTGCATACAATAAGATTAGTGTTAGCTATGGAGAAAGAATTCAGAGGTTGGGCCGTGTTGGGCGCTTTAAAAAGGGAGTGGCATTGCGCATTGGACACACCGAAAAGGGAATTATTGAGATTCCAAGTATGATTGCTAGTGAAGCTGCGCTTGCGTGCTTTGCATACAATTTGCCAGTAATGACAGGGGGTGTTTCAACTAGCCTCATTGGTAATTGTACTGTTCGTCAAGTTAAAACTATGCAACAATTTGAGCTGAGTCCATTCTTTATACAAAATTTTGTTGCCCATGATGGATCAATGCACCCTGTCATACATGACATTCTTAAGAAGTATAAACTGCGAGATTGTATGACGCCCTTGTGTGATCAATCCATACCTTACAGAGCCTCAAGCACTTGGTTGTCTGTTGGTGAGTACGAACGACTCGGAGTGGTTTTGGACATTCCGAAACAGATCAAGATTGCATTCCACATCAAGGACATCCCTCCTAAGCTGCATGAAACGCTCTGGGAAACAGTTATAAAATATAAGGATGTTTGTTTGTTTCCAAGTATT-CGGGCTTCATCCATTAGCAAAATTGCATACACACTGCGCACTGATCTCTTTGCAATCCCCAGAACCCTAATTCTAGTTGAAAGATTGCTCGAGGAGGAACGAGTGAAACAGAGCCAATTCAGAAGCCTCATTGATGAAGGATGCTCAAGCATGTTTTCAATTGTTAATTTAACAAACACTCTTAGAGCTAGATATGCAAAGGACTACACTGCAGAAAACATACAGAAGCTCGAGAAAGTGAGGAGTCAATTAAAGGAGTTCTCAAATTTAAATGGCTCTGCATGCGAGGAGAACTTAATGAAGAGGTATGAATCTCTACAGTTTGTGCATCATCAAGCAACAACTTCACTCGCGAAGGATTTGAGGTTGAAAGGAGTTTGGAAGAAATCACTAGTTGTGCAGGACTTACTCATAGCGGGTGCCGTTGCTATCGGTGGAATAGGGCTCATCTATAGTTGGTTTACTCAATCAGTTGAAACTGTGTCCCACCAGGGCAAGAACAAATCCAAAAGAATTCAAGCATTGAAATTTCGACACGCCCGCGATAAGAGGGCTGGCTTTGAAATTGACAACAATGATGATACGATAGAAGAATTCTTTGGATCTGCATACAGGAAGAAGGGAAAAGGTAAAGGCACCACTGTTGGTATGGGCAAGTCAAGCAGGAGGTTTGTTAATATGTATGGATTTGACCCAACAGAATATTCATTCATCCAGTTCGTTGATCCGCTCACTGGAGCTCAAATTGAAGAGAACGTCTATGCTGATATTAGAGACATCCAAGAGCGCTTTAGTGATGTCCGTAAGAAAATGGTAGAGGATGATGAAATCGAATTGCAAGCATTGGGCAGCAACACAACCATTCATGCTTACTTCAGGAAAGACTGGTCTGACAAGGCTCTAAAAATTGATTTGATGCCACACAACCCACTCAAAATCTGCGATAAATCAAATGGCATTGCTAAGTTTCCTGAAAGAGAACTTGAGTTGAGGCAAACTGGGCCAGCAATAGAGGTTGATGTGAAAGACATTCCAAAACAGGAAGTGGAGCATGAAGCCAAATCACTCATGAGAGGTTTAAGGGATTTCAATCCAATTGCTCAAACAGTTTGCAGAGTAAAAGTGTCTGTTGAATATGGAACGTCTGAAATGTATGGGTTCGGTTTTGGTGCGTATATTATAGTAAACCACCATCTATTCAAGAGTTTCAATGGATCCATGGAAGTGCGATCAATGCATGGAACATTCAGAGTGAAGAATTTGCATAGCTTGAGCGTTTTACCGATCAAAGGCAGAGACATTATCATCATAAAGATGCCAAAGGATTTCCCTGTTTTTCCACAAAAACTGCACTTCCGAGCTCCAATACAGAATGAGAGGATTTGTTTGGTTGGAACTAATTTTCAAGAAAAACATGCATCGTCAATCATCACAGAAACGAGTACTACATACAATGTGCCGGGCAGCACTTTTTGGAAGCATTGGATTGAAACAAATGATGGGCATTGTGGATTACCAGTAGTGAGTACAGCTGATGGATGTCTGGTTGGAATACATAGCTTGGCGAATAATGTGCAAACCACAAATTATTATTCAGCTTTTGATGAGGACTTTGAAAGCAAGTATCTCCGAACTAACGAGCACAATGAGTGGACCAAATCGTGGGTATATAACCCGGATACTGTGTTGTGGGGTCCATTGAAGCTCAAGGAGAGTACCCCTAAAGGCTTGTTTAAGACAACAAAACTTGTACAGGATTTAAT------TGATCATGATGTTGTTGTGGAGCAAGCTAAACATTCTGCGTGGATGTATGAGGCTCTAACAGGGAATTTGCAAGCTGTGGCGACAATGAAGAGTCAGCTAGTGACAAAGCACGTGGTCAAAGGGGAGTGTCGGCACTTCAAAGAGTTCTTAACTGTGGATTCGGAAGCAGAAGCT------TTCTTCAGGCCTTTGATGGATGCTTATGGGAAGAGCTTGTTAAATAGAGAAGCATATATAAAGGACATAATGAAATACTCAAAGCCTATTGATGTTGGAGTAGTAGACTGTGAT--GCTTTTGAAGAGGCTATCAATAGGGTTATCATTTATCTGCAA-GTGCATGGTTTCCAGAAATGCAATTACATCACCGACGAGCAGGAAATTTTCAAAGCTCTCAATATGAAAGCTGCTGTCGGAGCTATGTATGGAGGCAAGAAGAAAGACTACTTTGAGCATTTTACTGAGGCGGATAAAGAGGAAATTGTTATGCAAAGTTGCTTTCGATTGTACAAGGGCTCGCTTGGCATCTGGAATGGATCATTGAAAGCAGAACTTCGGTGCAAAGAGAAGATACTTGCAAATAAAACAAGGACATTCACTGCTGCACCTTTAGATACTCTACTGGGTGGAAAAGTGTGCGTTGATGATTTTAATAATCAATTCTACTCAAAGAACATTGAATGCTGCTGGACTGTTGGAATGACTAAGTTTTATGGAGGCTGGGACAGATTGCTTCGGCGTCTACCTGAAAATT---GGGTGTACTGCGATGCTGATGGTTCACAATTCGATAGTTCACTCACCCCATATCTAATTAATGCTGTTCTCATCATCAGAAGCACATACATGGAAGATTGGGACGTGGGGTTGCAAATGTTGCGCAATTTGTACACAGAAATAATTTACACGCCAATTTCAACTCCAGATGGAACAATTGTCAAGAAGTTTAGAGGTAATAATAGCGGTCAACCTTCTACCGTTGTGGATAATTCTCTCATGGTTGTCCTTGCTATGCATTACGCTCTCATTAAGGAGTGCGTTGAGTTTGAAGAAATCGACAGCACGTGTGCGTTCTTTGTTAATGGCGACGACTTATTGATTGCTGTGAACCCGGAGAAAGAGAGCATTCTCGATAGAATGTCGCAACATTTCTCAGATCTTGGTTTGAACTATGATTTTTCGTCGAGAACAAGAAGGAAGGAGGAATTGTGGTTTATGTCCCATAGAGGCCTGCTAATCGAGGGTATGTATGTGCCAAAGCTTGAAGAAGAGAGAATTGTATCCATTCTGCAATGGGATAGAGCTGATCTGCCAGAGCACAGACTAGAAGCGATTTGTGCAGCAATGATAGAATCCTGGGGTTATTTTGAGTTAACGCACCAAATCAGGAGATTCTATTCATGGTTGTTGCAACAGCAACCTTTTTCAACGATAGCGCAGGAAGGAAAAGCTCCATACATAGCGAGCATGGCATTGAAGAAGCTGTATATGGATAGGACAGTAGATGAGGAGGAACTGAAGGCTTTCACTGAAATGATG?GTTGCCTTGGATGATGAACTTGAGTGCGATACTTATGAAGTGCACCATCAAGGAAAT---------GACACAATCGATGCAGGAGGAAGCAATAAGAAGGATGCAAAACAAGAGCAAGGTAGCATTCAACCAAATCTCAACAAAGAAAAG---------------------------GAGAAGGACGTGAATGTTGGAACATCTGGAACTCATACTGTGCCACGAATTAAAGCCATCACGTCTAAAATGAGAATGCCCAAGAGTAAGGGTGCAACTGTACTGAACTTAGAACATTTACTCGAGTATGCTCCACAGCAAATTGATATCTCAAATACTCGAGCGACTCAATCACAGTTTGATACATGGTATGAAGCAGTACAGCTTGCTTACGACATAGGAGAAACTGAAATGCCAACTGTGATGAATGGGCTTATGGTTTGGTGCATTGAGAATGGAACCTCGCCAAACATCAACGGTGTTTGGGTTATGATGGATGGAAATGAACAAGTTGAATACCCACTCAAGCCGATTGTTGAAAATGCAAAACCAACCCTTAGGCAAATTATGGCACATTTCTCAGATGTTGCAGAAGCGTATATTGAAATGCGCAACAAAAAGGAACCATATATGCCACGATATGGTTTGGTTCGAAATCTGCGTGATGGAAGTCTGGCTCGTTATGCTTTTGACTTTTATGAAGTTACATCACGTACACCAGTAAGGGCTAGAGAGGCACACATTCAAATGAAAGCCGCAGCTCTGAAATCAGCTCAATCCCGACTTTTCGGATTGGATGGTGGCATTAGTACACAAGAGGAAAACACAGAGAGGCACACCACCGAGGATGTTTCTCCAAGTATGCATACTCTACTTGGAGTGAAGAACATGTGATTATAGTGTCTTTCCGGACGATATATAAATATTTATG-TTTGCAGTAAGTATTTTGGCTTTTCCTGTACTACTTTTATCGTAACTAATAATCATTTTGAATATTACTGGCAGATAGGGGTGGTATAGCGATTCCGTCGTTGT-AGTGACCTTAGCTGTCGTTTCTGTATTATT-------------------------------------------------------------------------------------------------------------------------------------------------------------------------------------------------------------------------------------ATGTTT-GTATAAAAGTGCCGGGTTGTTGTTGTTGTGGCTGATTCATCGATTAGGTGGTGTTGCGATTTTGTCGTAGCAGTGACTATGTCTGGATTTATGCTACTTGGGTGATGCTGTGATTCCGTCATAGCAGTGACTGTAAACTTCAATCAGGAGA?
	NN300_60     ????????????????????????????????????????????????????????????????????????????????????????????????????????????????????????????????????????????????????????????????????????????????????????????????????????????????????????????????????????????ACTTCCATACTCACCCGCTCCTTTTGGGCTAGTTGCGGGGAAACGAGAAGTTTCAACC-------------------------------------------------------------------------------------------------------------------------------------------------------------------------------------------------------------------------------------------------------------------------------------------------------------------------------------------------------------------------------------------------------------------------------------------------------------------------------------------------------------------------------------------------------------------------------------------------------------------------------------------------------------------------------------------------------------------ACCACTGACCCCTTCGCAAGTTTGGAGATGCAGCTTAGTGCGCGATTACGAAGGCAAGAGTTCGCAACTATTCGAACATCCAAGAATGGTACTTGCGTGTATCGATACAAGACTGATGTCCAGATTGCACGCATTCAAAAGAAGCGCGAGGAAAGAGAAAGAGAGGAATATAATTTCCAAATGGCTGCGTCAAGTGTTGTGTCGAAGATTACTATTGCTGGTGGAGAGCCACCTTCAAAACTTGAATCACAAGTGCGGAGGGGTGTCATCCACACAACTCCAAGGATGCGCACAGCAAAAACATATCACACGCCAAAGTTGACAGAGGGACAAATGAACCACCTTATCAAGCAGGTGAAGCAAATTATGTCAACCAAAGGAGGGTCTGTTCAACTGATTAGCAAGAAAAGTACCCATGTTCACTATAAAGAAGTTTTGGGATCACATCGCGCAGTCGTTTGCACTGCA?CATATGAGAGGTTTACGAAAGAGAGTGGACTTTCGGTGTGATAAATGGACTGTTGTGCGTCTACAGCATCTCGCCAGGACAGACAAGTGGACTAACCAAGTTCGTGCTACTGATCTACGCAAGGGCGATAGTGGAGTTATATTGAGTAATACTAGTCTCAAAGGAAACTTTGGGAGAAGCTCGGAGGGCTTATTCATAGTGCGTGGGTCGCACGAAGGAAAAATCTATGATGCCCGTTCCAAGGTTACTCAAGGGGTTATGGATTCAATGGTTCAGTTCTCAAGCGCTGAAAGCTTTTGGAAGGGATTGGACGGCAATTGGGCACAAATGAGATATCCTACAGATCATACATGTGTGGCAGGCCTACCAGTTGAAGACTGTGGCAGAGTTGCAGCGATAATGACACACAGTATTTTACCGTGCTATAAGATAACCTGCCCTACCTGTGCCCAACAATATGCCAACTTGCCAGCCAGTGACTTACTTAAGATATTACACAAGCACGCAAGTGATGGTTTAAATCGATTGGGGGCGGACAAAGATCGCTTTGTGCATGTCAAAAAGTTCTTGACAATCTTAGAGCACTTAACTGAACCGGTTGATCTGAGTCTAGAAATTTTCAATGAAGTATTCAAGTCTATAGGGGAGAAGCAACAATCACCTTTCAAAAACCTGAATATTCTGAATAATTTCTTTTTAAAAGGAAAGGAAAATACAGCTCGTGAATGGCAGGTGGCTCAATTAAGCTTACTTGAATTGGCAAGATTCCAAAAGAACAGAACGGATAATATCAAGAAAGGAGACATCTCGTTCTTTAGGAATAAACTATCTGCCAAAGCAAACTGGAACTTGTATCTGTCATGTGATAACCAGCTGGATAAGAATGCAAACTTCCTGTGGGGACAGAGGGAATATCATGCTAAGCGATTTTTCTCGAACTATTTCGAGGAAATTGATCCAGCGAAGGGCTATTCAGCATACGAAAATCGTTTGCATCCGAATGGGACAAGAAAGCTTGCAATTGGAAACCTAATTGTTCCACTTGATCTGGCTGAGTTTAGGCGGAAGATGAAAGGTGATTATAAAAGACAGCCAGGGGTGAGTAAGAAGTGCACGAGCTCGAAGGATGGAAACTACGTGTATCCCTGTTGTTGCACTACACTTGATGATGGCTCAGCTGTTGAATCAACATTCTACCCGCCAACTAAGAAGCACCTCGTAATAGGTAATAGTGGCGACCAAAAGTATGTTGACTTACCAAAAGGGAATTCTGAGATGTTATATATTGCCAGGCAAGGCTTCTGTTACATTAACATTTTCCTCGCGATGTTGATTAACATTAGTGAGGAAGATGCAAAGGATTTCACTAAGAAGGTTCGTGACATGTGTGTGCCAAAGCTTGGAACCTGGCCAACCATGATGGATTTGGCTACAACTTGTGCTCAAATGAAGATATTCTACCCTGATGTTCATGATGCAGAGCTGCCCAGAATACTAGTCGACCATGAAACTCAGACATGCCATGTGGTCGACTCGTTTGGTTCGCAAACTACTGGTTATCATATTTTAAAGGCATCTAGCGTGTCTCAGCTTATCTTGTTTGCAAACGATGAGTTGGAATCTGACATTAAGCACTATAGAGTTGGTGGTATTCCTGGGGCATGTCCTGAGCTCGGATCCACGAT-ATCACCTTTCAGAGAAGGAGGAATCATAATGTCTGAGTCAGCAGCGCTGAAACTGCTTTTAAAGGGTATCTTTAGACCCAAGGTGATGAGGCAGTTACTATTAGATGAACCATATCTGCTCATTCTTTCGATATTGTCCCCTGGTATACTTATGGCTATGTATAATAATGGGATTTTTGAGCTTGCAGTGAAGTTGTGGATTAATGAAAAGCAATCTATAGCCATGATAGCATCGTTGTTGTCCGCCTTAGCTTTACGAGTGTCAGCAGCAGAAACACTCGTTGCACAGAGGATTATAATTGACACGGCAGCAACAGATCTTCTCGATGCTACGTGTGATGGGTTCAATTTAAATCTGACATATCCCACTGCACTCATGGTGTTGCAAGTTGTTAAGAACAGAAATGAATGTGATGATACGTTGTTTAAGGCAGGTTTTTCACATTACAATATGAGTGTCGTGCAGATTATGGAAAAAAATTATCTAAGCCTCTTGGGCGATGCCTGGAAAGATTTAACCTGGCGAGAAAAATTATCCGCAACATGGCACTCATACAAAGCAAAGCGCTCTATCACTCAGTTCATAAAACCCATAGGCAAAGCAGATTTAAAAGGGTTGTACAACATATCACCGCAAGCATTCTTGGGTCAGGGCGTACAGATAGTCAAAGGCACCGCCTCAGGGTTGAATGAGCGACTCAACAATTACATTAATACTAAGTGTGTAAATATTTCATCCTTTTTCATTTTTAGAATTTTCTGGCGCTTGCCAACTTTTGTAACTTTCATTAATTCATTATTAGTCATTAGTATGCTAACTAGTGTAGTAGCAGTGTGTCAAGCAATAATTCTAGATCAAAGGAAGTATAGAAAAGAAATTGAGTTGATGCAGATTGAGAAGAATGAAATTGTTTGTATGGAGTTGTATGCGAGTCTGCAGCGCAAACTTGAGCGTGAATTCACATGGGATGAATATATAGAATATTTGAAGTCTGTGAATCACCAGATAGTTCAATTCGCGCAAGCTCAAATGGAAGAATATAATGTGCGACATCAGCGCTCCACACCAGGTGTTAAGAATTTAGAGCAGGTGGTAGCATTGATAACTCTAATTATCATGATGTTTGATGTTGAAAGGAGCGACTGTGTATTTAAGACTCTCAACAAATTCAAGGGCATCGTTTCTTCAATGGATCATGAAGTTAGACACCAGTCCTTGGATGATGTAATCAAGAATTTCGATGAAAGGAACGAAGTTATTGATTTTGAGCTAAATGAGGACACAATTAAAACATCATCAGTGTTGGACACAAAGTTTAGCGACTGGTGGGATCGGCAAATCCAAATGGGACACACACTTCCCCACTATAGAACTGAGGGACACTTCATGGAATTCACAAGGGCAACTGCTATACAAGTGGCCAACGACATCGCGCATAGTGAGCACCTAGATTTTCTAGTGCGGGGAGCTGTTGGGTCTGGAAAATCTACTGGACTGCCTGTTCATCTCAGTGCAGCTGGATCCGTGCTTCTGATAGAACCAACTCGACCACTTGCAGAAAACGTGTTCAAGCAATTATCCAGTGAACCGTTTTTCAAGAAGCCAACACTGCGCATGCGAGGGAATAGTGTGTTTGGTTCCTCTCCAATCTCTATCATGACTAGCGGCTTTGCCTTGCACTACTATGCTAATAATCGCTCTCAGCTAACTCAGTTTAATTTCATAATCTTTGATGAATGTCATGTTTTAGATCCTTCTGCAATGGCATTTCGTAGCTTGCTAAGTGTGTATCACCAAACATGCAAAGTGTTAAAGGTGTCAGCCACTCCAGTGGGAAGGGAGGTCGAATTCACAACACAACAACCAGTTAAGTTGGTGGTTGAGGATACACTTTCATTTCAATCTTTTGTTGATGCGCAAGGCTCAAAAACCAATGCCGACGTTGTTCAGCATGGTTCGAACATACTCGTGTATGTGTCGAGTTACAATGAAGTGGATACATTAGCCAAGCTTCTAACAGATAGGAATATGGTTGTCTCGAAAGTTGATGGCAGAACAATGAAGCACGGATGCTTAGAAATTGTAACGAAAGGGACTAGTGCAAAGCCACATTTTGTCGTTGCAACCAATATTATTGAAAATGGAGTAACTTTAGATATAGATGTAGTTGTAGATTTTGGGCTTAAAGTCTCACCGTTTTTAGATATTGACAATAGGAGCATTGCATACAATAAGATTAGTGTTAGCTATGGAGAAAGAATTCAGAGG??????????????????????????????????????????????????????????????????????????????????????????????????????????????????????????????????????????????????????????????????????????????????????????????????????????????????????????????????????????????????????????????????????????????????????????????????????????????????????????????????????????????????????????????????????????????????????????????????????????????????????????????????????????????????????????????????????????????????????????????????????????????????????????????-????????????????????????????????????????????????????????????????????????????????????????????????????????????????????????????????????????????????????????????????????????????????????????????????????????????????????????????????????????????????????????????????????????????????????????????????????????????????????????????????GTTTGTGCATCATCAAGCAACAACTTCACTCGCTAAGGATTTGAAGTTGAAAGGAGTTTGGAAGAAATCACTAGTTGTGCAGGACTTACTCATAGCGGGTGCCGTTGCTATCGGTGGAATAGGGCTCATCTATAGTTGGTTTACTCAATCAGTTGAAACTGTGTCTCACCAGGGCAAGAACAAATCCAAAAGAATTCAAGCATTGAAATTTCGACACGCCCGCGATAAGAGGGCTGGCTTTGAAATTGATAACAATGATGATACAATAGAAGAATTCTTTGGATCTGCATACAGGAAGAAGGGAAAAGGTAAAGGCACTACTGTTGGTATGGGCAAGTCGAGCAGGAGGTTTGTTAATATGTATGGATTTGACCCAACAGAATATTCATTCATCCAGTTCGTTGATCCGCTCACTGGAGCTCAAATTGAAGAGAACGTCTATGCTGATATTA?????????????????????????????????????????????????????????????????????????????????????????????????????????????????????????????????????????????????????????????????????????????????????????????????????????????????????????????????????????????????????????????????????????????????????????????????????????????????????????????????CAATTGCTCAAACAGTTTGCAGAGTAAAAGTGTCTGTCGAATATGGAACGTCTGAAATGTATGGGTTCGGTTTTGGTGCGTATATTATAGTAAACCACCATCTATTCAAGAGTTTCAATGGATCCATGGAAGTGCGATCAATGCATGGAACATTCAGAGTGAAGAATTTGCATAGCTTGAGTGTTTTACCGATCAAAGGCAGAGACATTATCATCATAAAGATGCCAAAGGATTTCCCTGTTTTCCCACAAAAACTGCACTTCCGAGCTCCAATACAGAATGAGAGGATTTGTTTGGTTGGAACTAATTTTCAAGAAAAACATGCATCGTCAATCATCACAGAAACGAGTACTACATACAATGTGCCGGGCAGCACTTTTTGGAAGCATTGGATTGAAACAAATGATGGGCATTGTGGATTACCAGTAGTGAGTACAGCTGATGGATGTCTGGTTGGAATACATAGCTTGGCGAATAATGTGCAAACCACAAATTATTATTCAGCTTTTGATGAGGATTTTGAAAGCAAGTATCTTCGAACTAATGAGCACAATGAGTGGACCAAATCGTGGGTATATAACCCAGATACTGTGTTGTGGGGTCCATTGAAGCTCAAGGAAAGTACCCCTAAAGGCTTGTTTAAGACAACAAAACTTGTACAGGATTTAAT------TGATCATGATGTTGTTGTAGAGCAAGCTAAACATTCTGCGTGGATGTATGAGGCTCTAACAGGGAATTTGCAAGCTGTGGCGACAATGAAGAGTCAGCTAGTGACAAAGCACGTGGTCAAAGGGGAGTGTCGGCACTTCAAAGAGTTCTTAACTGTGGATTCGGAAGCAGAAGCT------TTCTTCAGGCCTTTGATGGATGCTTATGGGAAGAGCTTATTAAATAGAGAAGCATATATAAAGGACATAATGAAATACTCAAAGCCTATTGATGTTGGAGTAGTAGACTGTGAT--GCTTTTGAAGAGGCTATCAATAGGGTTATCATTTATCTGCAA-GTGCATGGTTTCCAGAAATGCAATTACATCACCGATGAGCAGGAAATTTTCAAAGCTCTCAATATGAAAGCTGCTGTCGGAGCTATGTATGGAGGCAAGAAGAAAGACTACTTTGAGCATTTTACTGAGGCGGATAAAGAGGAAATTGTTATGCAAAGTTGCTTTCGATTGTACAAGGGCTCGCTTGGCATATGGAATGGATCATTGAAAGCAGAACTTCGGTGCAAAGAGAAGATACTTGCAAATAAGACAAGGACATTCACTGCTGCACCTTTAGATACTCTACTGGGTGGAAAAGTGTGCGTTGATGATTTTAATAATCAATTCTACTCAAAGAACATTGAATGCTGCTGGACTGTTGGAATGACTAAATTTTATGGAGGTTGGGACAGATTGCTTCGGCGTCTACCTGAAAATT---GGGTGTATTGCGATGCTGATGGTTCACAATTCGATAGTTCACTCACCCCATACCTAATTAATGCTGTTCTCATCATCAGAAGCACATACATGGAAGATTGGGACTTGGGGTTGCAAATGCTGCGCAATTTGTACACAGAAATAATTTACACGCCAATTTCAACTCCAGATGGAACAATTGTCAAGAAGTTTAGAGGTAATAATAGCGGTCAACCTTCTACCGTTGTGGATAATTCTCTCATGGTTGTCCTTGCTATGCATTACGCTCTCATCAAGGAGTGCGTTGAGTTTGAAGAAATCGACAGCACGTGTGTATTCTTTGTCAATGGTGACGACTTATTGATTGCTGTGAATCCGGAGAAAGAGAGCATTCTCGATAGAATGTCACAACATTTCTCAGATCTTGGTTTGAACTATGATTTTTCGTCGAGAACAAGAAGGAAGGAGGAATTGTGGTTCATGTCCCATAGAGGCCTGCTAATCGAGGGTATGTACGTGCCAAAGCTTGAAGAAGAGAGAATTGTATCCATTCTGCAATGGGATAGAGCTGATCTGCCAGAGCATAGATTAGAAGCGATTTGTGCAGCAATGATAGAATCCTGGGGTTATTTTGAGTTAACGCACCAAATCAGGAGATTCTATTCATGGTTGTTGCAACAGCAACCTTTTTCAACGATAGCGCAGGAAGGAAAAGCTCCATACATAGCGAGCATGGCATTGAAGAAGCTGTATATGGATAGGACAGTAGATGAGGAGGAATTGAAGGCTTTCACTGAAATGATG?GTTGCCTTGGATGATGAACTTGAGTGCGATACTTATGAAGTGCACCATcaaGCAAAT---------GACACAATCGATGCAGGAGGAAGCAATAAGAAGGATGCAAAACAAGAGCAAGGTAGCATTCAACCAAATCTCAACAAAGAAAAG---------------------------GAGAAGGACGTGAATGTTGGAACATCTGGAACTCATACTGTGCCACGAATTAAAGCCATCACGTCTAAAATGAGAATGCCCAAGAGTAAGGGTGCAACTGTACTGAACTTAGAACATTTACTCGAGTATGCTCCACAGCAAATTGACATCTCAAATACTCGAGCAACTCAATCACAGTTTGATACATGGTATGAAGCAGTACAGCTTGCTTACGACGTAGGAGAAACTGAAGTGCCAACTGTGATGAATGGGCTTATGGTTTGGTGCATTGAGAATGGAACCTCGCCAAACATCAACGGTGTCTGGGTTATGATGGATGGAAATGAACAAGTTGAATACCCACTCAAGCCGATTGTTGAAAATGCAAAACCAACCCTTAGGCAAATCATGGCACATTTCTCAGATGTTGCAGAAGCGTATATTGAAATGCGCAACAAAAAGGAACCATATATGCCACGATATGGTTTAGTTCGAAATCTGCGTGATGGAAGTTTGGCTCGTTATGCCTTTGACTTTTATGAAGTTACATCACGTACACCAGTAAGGGCTAGAGAGGCACACATTCAAATGAAAGCCGCAGCTCTGAAATCAGCTCAATCCCGACTTTTCGGATTGGATGGTGGCATTAGTACACAAGAGGAAAACACAGAGAGGCACACCACCGAGGATGTTTCTCCAAGTATGCATACTCTACTTGGAGTGAAGAACATGTGATTATAGTGTCTTTCCGGACGATATATAAATATTTATG-TTTGCAGTAAGTATTTTGGCTTTTCCTGTACTACTTTTATCGTAACTAATAATCAGTTTGAATATTACTGGCAGATAGGGGTGGTATAGCGATTCCGTCGTTGT-AGTGACCTTAGCTGTCGTTTCTGTATTATT-------------------------------------------------------------------------------------------------------------------------------------------------------------------------------------------------------------------------------------ATGTTT?GTGTAAAAGTGCCGGGTTGTTGTTGTTGTGGCTGAT????????????????????????????????????????????????????????????????????????????????????????????????????????????????????
	SASA_61      ?????????????????????????????AAATCAACGCAAAAACACTCACAAAAGCTTTCAATTCTAACTCAAGCAATTTGTTAAGTTTCAACTTTGATCTTCGTCGTACAGACCGTTTCAACTTCAGTGTAAGTTCTCGTAACTCAATAGTTTATTTCAAACCCTCTCAAATAGCAACATACCAGCCATGGCAACTTACATGTCAACGATTCAATTCGGTTCCATTGAATGCAAACTTCCATACTCACCCGCCCCTTTTGAGCTAGTTGCGAGGGAACGAGAAGTTTCAACC-------------------------------------------------------------------------------------------------------------------------------------------------------------------------------------------------------------------------------------------------------------------------------------------------------------------------------------------------------------------------------------------------------------------------------------------------------------------------------------------------------------------------------------------------------------------------------------------------------------------------------------------------------------------------------------------------------------------ATCACCGACCCCTTCGCAGGTTTGGAGATGCAGCTTAGTACGCGACTACGAAGGCAAGAGTTCGCGACTGTCCGTACATCCAAGAGTGGCACCTGCATGTATCGATACAAGACTGATGTCCAGATTGCGCGCATCCAAAAGAAGCGCGAGGAAAGAGAAAGAGAAGAACACAACTTCCAAATGGCTGCACCGAGTGTTGTGTCGAAGATTACTATTGCTGGTGGAGAGCCACCTTCGAAACTTGAATCACAAGTGCAGAGGGGTGTCATCCACACAACTCCAAGAATGCGTACAGTGAAAACATATCACACGCCAAAGTTGACAGAGAAACAAATGAACCATCTTATCAAGCAGGTAAAGCAAATCATGTCAACTAAAGGAGGATCTGTTCAACTGATTAGCAAGAAAAGTACCCATGTTCAATATAAAGAAGTTTTGGGAGCACATCGCGCAGTCGTTTGCACTGCA?CATATGAGAGGTTTACGAGAGAGAGTAGACTTTCAGTGTGATAAGTGGACTGTTATGTGTCTGAAGCATCTCGCAAGGACGGACAAGTGGACTAACCAAGTTCGTGCTACTGATCTACGAAAGGGCGATAGTGGAGTTATATTGAGTAATACTAATCTCAAAGGATACTTTGGGAGAAGTTCGGAGGGTCTATTTATAGTGCGTGGATCGCATGAAGGAAAAATCTATGATGCGCGTTCCAAGGTTACACAAGGAGTTCTAGACTCAATGGTTCAGTTCTCAAACGCTGAAAGCTTCTGGAAGGGATTGGACGGCAATTGGGCACGGATGAGATACCCTACAGATCATACATGCGTAGCAGGCTTACCAGTTGAAGATTGTGGCAGAGTAGCAGCAATAATGACACACAGTATTCTACCGTGCTATAAGATAACCTGCCCCACCTGTGCTCAACAGTATGCCAACTTGCCAGCCAGTGATTTGCTCAAAGTATTACACGGGCACGCAAGTGATGGTTTAAGTCGATTGGGAGCGGATAAAGATCGCTTTGTGCATGTCAGTAAGTTCTTGACAGTCCTAGAGCACTTGACTGAACCAGTTGATCTAAATCTAGAAATCTTCAATGAAGTATTCAAGTCTATAGGAGAGAAGCAACAATCACCTTTCAAAAACCTGAATATTCTGAATAATTCCTTTTTGAAAGGAAAGGAGAATACAGCTCGTGAATGGCAAGTGGCTCAATTAAGCTTACTTGAATTGGCAAGATTCCAAAAGAACAGGACGGATAATATCAAGAAAGGTGACATCTCGTTCTTCAGGAATAAGCTATCCGCCAAAGCGAATTGGAACTTGTATCTGTCATGCGATAATCAGTTGGATAAGAACGCAAACTTCCTGTGGGGACAGAGGGAATATCATGCCAAGCGGTTTTTCTCGAACTTTTTCGAGGAAATTGATCCAGCGAAGGGCTACTCAGCGTACGAAACTCGTTTGCATCCGAATGGGAGAAGAAAACTTGCAATTGGAAACCTAATTGTTCCACTCGATCTGGCTGAGTTTAGGCGGAAGATGAAAGGTGATTATAAAAGACAGCCAGGGGTGAGTAAGAAGTGCACGAGCTCGAAGGATGGAAACTACGTGTATCCCTGTTGTTGTACTACACTCGATGATGGCTCAGCTGTTGAATCAACATTTTACCCACCAACTAAAAAGCATCTTGTAATAGGTAACAGCGGTGATCAAAAGTATGTTGATCTACCAAAAGGGAATTCTGAAATGTTATACATTGCCAGGCAAGGGTTTTGTTATATTAATATATTCCTTGCGATGTTGATTAACATTAGTGAAGAAGATGCAAAGGATTTCACGAAGAAGGTTCGTGACATGTGTGTGCCAAAGCTTGGAACCTGGCCAACCATGATGGATCTGGCTACTACTTGTGCTCAAATGAAAACATTCTACCCTGATGTCCATGATGCAGAGCTGCCCAGAATACTAGTCGACCATGAAACTCAGACATGCCATGTGGTCGACTCGTTTGGTTCGCAAACAACTGGTTATCATATTTTAAAGGCATCTAGCGTGTCTCAGCTTATCTTGTTTGCAAACGATGAGTTGGAATCTGACATTAAGCATTATAGAGTTGGTGGTATTCCTGGGGCATGTCCTGAGCTCGGATCCACGAT-ATCACCTTTCAGAGAAGGAGGAATCATAATGTCTGAGTCAGCAGCACTGAAACTGCTTTTAAAGGGTATCTTTAGACCCAAGGTGATGAGACAGTTACTATTAGATGAACCATATCTGCTCATTCTTTCGATATTGTCCCCTGGCATACTCATGGCTATGTACAATAATGGGATTTTTGAGCTTGCAGTGAAGTTGTGGATTAATGAAAAGCAATCTGTAGCCATGATAGCATCGTTATTGTCCGCCTTAGCTTTACGAGTGTCAGCAGCAGAAACACTCGTTGCACAGAGGATTATAATTGACACGGCAGCAACAGATCTTCTCGATGCTACGTGTGATGGATTCAATTTAAATCTGACATATCCCACTGCACTCATGGTGTTGCAAGTTGTTAAGAACAGAAATGAATGTGATGATACGTTGTTTAAGGCAGGTTTTTCACATTACAACATGAGTGTCGTGCAGATTATGGAAAAAAATTATCTAAGCCTCTTGGGCGATGCGTGGAAAGATTTAACCTGGCGAGAAAAATTATCCGCAACATGGCACTCATACAAAGCAAAGCGCTCTATCACTCAGTTCATAAAACCCATAGGCAAAGCAGATTTAAAAGGGTTGTACAACATATCACCGCAAGCATTCTTGGGTCAGGGCGTACAGAGAGTCAAAGGCACCGCCTCAGGGTTGAATGAGCGACTCAATAATTATATCAATACTAAGTGTGTAAATATTTCATCCTTTTTCATTCGTAGAATTTTCCGGCGCTTGCCAACTTTTGTAACTTTCATTAATTCATTATTAGTCATTAGTATGCTAACTAGTGTAGTAGCAGTGTGTCAAGCAATAATTCTAGATCAAAGGAAGTATAGAAAGGAAATTGAGTTGATGCAGATTGAGAAGAATGAAATTGTTTGTATGGAGTTGTATGCGAGTCTGCAGCGCAAACTTGAGCGTGAATTCACATGGGATGAATATATGGAATATTTGAAATCTGTGAATCCCCAGATAGTTCAATTCGCGCAAGCTCAAATGGAAGAATATAATGTGCGGCATCAGCGCTCCACACCAGGTGTTAAGAATTTAGAGCAGGTAGTAGCATTTATAACTCTAATTATCATGATGTTTGATGCTGAAAGGAGCGACTGTGTATTTAAGACTCTCAACAAATTCAAGGGCATCGTTTCTTCAATGGATCATGAAGTTAGACACCAGTCCTTGGATGATGTAATCAAGAATTTCGATGAAAGGAACGAAGTTATCGATTTTGAGCTAAATGAGGATACAATTAAAACATCATCAGTGTTGGACACAAAGTTTAGCGACTGGTGGGATCGGCAAATCCAAATGGGACACACACTTCCCCACTATAGAACTGAGGGACACTTCATGGAATTCACAAGGGCAACTGCTGTGCAAGTGGCCAATGACATCGCGCATAGTGAGCACCTAGATTTTCTAGTGAGGGGAGCTGTTGGGTCTGGAAAATCTACTGGACTGCCTGTTCATCTCAGTGCAGCTGGATCCGTGCTTTTGATAGAACCAACTCGACCACTTGCAGAAAACGTGTTCAAGCAGTTATCCAGTGAACCGTTTTTCAAGAAGCCAACACTGCGCATGCGAGGAAATAGTGTGTTTGGTTCCTCTCCAATTTCCATCATGACTAGCGGCTTTGCGTTGCACTACTATGCTAATAATCGCTCTCAGCTAACTCAGTTTAATTTCATAATTTTTGATGAATGTCATGTTCTAGATCCTTCTGCAATGGCATTTCGTAGCTTGTTAAGTGTGTATCACCAAACATGCAAAGTGTTAAAGGTATCAGCCACTCCAGTGGGAAGGGAGGTCGAGTTCACAACACAACAACCAGTTAAATTGGTAGTTGAGGATACACTTTCATTCCAATCTTTTGTTGATGCGCAAGGCTCAAAAACCAATGCCGACGTTGTTCAGCATGGTTCGAACATACTCGTGTATGTGTCGAGTTACAATGAAGTGGATACATTAGCCAAGCTTCTAACGGATAGGAATATGGTCGTCTCAAAAGTTGATGGCAGAACAATGAAGCACGGATGCTTAGAAATTGTAACGAAAGGGACTAGTGCAAAGCCACATTTTGTCGTAGCAACCAACATTATTGAAAATGGAGTAACTTTAGATATAGATGTAGTTGTAGATTTTGGGCTTAAAGTCTCACCGTTTTTAGATATTGACAATAGGAGCATTGCATACAATAAGATTAGTGTTAGCTATGGAGAAAGAATTCAGAGGTTGGGTCGTGTTGGGCGCTTTAAGAAGGGAGTGGCATTGCGTATTGGGCACACCGAAAAGGGAATTATTGAGATTCCAAGTATGATTGCTAGTGAAGCTGCGCTTGCGTGCTTTGCATACAATTTGCCAGTAATGACAGGGGGTGTTTCAACTAGCCTCATTGGCAATTGTACTGTTCGTCAAGTTAAAACTATGCAACAATTTGAGCTGAGTCCATTCTTTATACAAAATTTTGTTGCCCATGATGGATCAATGCATCCTGTCATACATGACATTCTTAAGAAGTATAAACTGCGAGATTGTATGACGCCCTTGTGTGATCAATCCATACCTTACAGAGCCTCAAGCACTTGGTTGTCTGTTGGTGAGTACGAACGACTCGGAGTGGTTTTGGACATTCCAAAACAGATCAAGATTGCATTCCACATCAAGGACATCCCTCCTAAGTTGCATGAAATGCTTTGGGAAACAGTTATTAAATATAAGGATGTGTGTTTGTTTCCAAGTATT-CGGGCTTCATCCATTAGCAAAATTGCATACACACTGCGCACTGATCTTTTTGCAATCCCCAGAACCCTAATTCTAGTTGAAAGATTGCTCGAGGAGGAACGAGTGAAACAGAGCCAATTTAGAAGTCTCATTGATGAAGGATGCTCAAGTATGTTTTCAATTGTTAATTTAACAAACACTCTTAGAGCTAGATATGCAAAGGATTACACTGCAGAAAACATACAGAAGCTCGAGAAAGTGAGGAGTCAGTTAAAGGAGTTCTCAAATTTAAATGGCTCTGCATGCGAGGAGAACTTAATGAAGAGGTATGAATCTCTACAGTTTGTGCATCATCAAGCAACAACTTCACTCGCAAAGGATTTGAAGTTGAAAGGAGTTTGGAAGAAGTCACTAGTTGTGCAGGACCTACTCATAGCGGGTGCCGTTGCTATCGGTGGAATAGGGCTTATCTATAGTTGGTTTACTCAACCAGTTGAAACTGTGTCTCACCAGGGCAAGAACAAATCCAAAAGAATTCAAGCATTGAAGTTTCGACATGCCCGCGATAAGAGGGCTGGCTTTGAAATTGATAACAATGATGATACAATAGAAGAATTCTTTGGATCTGCATACAGGAAGAAGGGAAAAGGTAAAGGCACCACTGTTGGTATGGGCAAATCAAGCAGGAGGTTTGTTAATATGTATGGATTCGACCCAACAGAATATTCATTCATCCAGTTCGTTGATCCGCTCACTGGAGCTCAAATTGAAGAGAACGTCTATGCTGATATTAGAGACATCCAAGAGCGCTTTAGTGATGTCCGCAGGAAAATGGTAGAGGATGATGAAATCGAATTGCAAGCATTGAGCAGCAACACAAACATTCATGCTTACTTCAGGAAAGATTGGTCTGACAAGGCTCTAAAAATTGATTTGATGCCACACAACCCACTCAAAATCTGCGATAAATCGAATGGCATTGCTAAGTTTCCTGAAAGAGAATTTGAGTTGAGGCAAACTGGGCCAGCAATAGAGGTTGATGTGAAAGACATCCCAAAACAGGAAGTGGAGCATGAAGCCAAATCACTCATGAGAGGTTTAAGGGATTTCAATCCAATTGCTCAAACAGTTTGCAGAGTAAAAGTGTCTGTTGAGTATGGAACGTCTGAAATGTATGGGTTCGGTTTTGGTGCGTATATTATAGTAAACCACCATCTATTCAAGAGTTTCAATGGATCCATGGAAGTGCGATCAATGCATGGAACATTCAGAGTGAAGAATTTGCATAGCTTGAGTGTTTTACCGATCAAAGGCAGAGACATTATCATCATAAAGATGCCAAAGGACTTCCCTGTTTTCCCACAAAAACTGCACTTCCGAGCTCCAATACAAAATGAGAGGATTTGTTTGGTTGGAACTAACTTTCAAGAAAAACATGCATCGTCAATCATCACAGAAACGAGTACTACATACAATGTGCCGGGCAGCACTTTTTGGAAACATTGGATTGAAACAAATGATGGGCATTGTGGATTACCAGTAGTGAGTACAGCTGATGGATATCTGGTTGGAATACACAGCTTGGCGAATAATGTGCAAACAACGAATTATTATTCAGCTTTTGATGAGGATTTTGAAAGCAAGTATCTCCGAACTGATGAACACAATGAGTGGACCAAATCGTGGGTATATAACCCAGATACTGTGTTGTGGGGTCCATTGAAGCTCAAGGAGAGTACCCCTAAAGGCTTGTTTAAGACAACAAAACTCGTACAGGATTTAAT------TGATCATGATGTTGTTGTAGAGCAAGCTAAACATTCTGCGTGGATGTATGAGGCTCTAACTGGGAATTTGCAAACTGTGGCGACAATGAAGAGTCAGCTAGTGACAAAGCACGTGGTCAAAGGGGAGTGTCGGCACTTCAAAGAGTTCTTAACTGTGGATTCGGAAGCAGAAGCT------TTCTTCAGGCCTTTGATGGATGCTTATGGGAAGAGCTTATTAAATAGAGAAGCATATATAAAGGACATAATGAAATACTCAAAGCCTATTGATGTTGGAATAGTAGACTGCGAT--GCTTTTGAAGAGGCTATCAATAGGGTTATCATTTATCTGCAA-GTGCATGGTTTCCAGAAATGCAATTACATCACTGATGAGCAGGAAATTTTCAAAGCTCTCAATATGAAAGCTGCTGTCGGAGCTATGTATGGAGGCAAGAAGAAAGACTACTTTGAGCATTTTACTGAGGCGGATAAAGAGGAAATTGTTATGCAAAGTTGCTTGCGATTGTACAAGGGCTCGCTTGGCATATGGAATGGATCATTGAAAGCAGAACTTCGGTGCAAAGAGAAGATACTTGCAAATAAGACAAGGACATTCACTGCTGCACCTTTAGATACTCTACTGGGTGGAAAGGTGTGCGTTGATGATTTTAATAATCAATTCTACTCAAAGAACATTGAATGCTGCTGGACTGTTGGAATGACTAAGTTTTATGGAGGTTGGGACAAATTGCTTCGGCGTCTACCTGAAAATT---GGGTGTACTGCGATGCTGATGGTTCACAATTCGATAGTTCACTCACCCCATACCTAATTAATGCTGTTCTCATCATCAGAAGCACATACATGGAAGATTGGGAATTGGGGTTGCAAATGTTGCGCAATTTGTACACAGAAATAATTTACACACCAATCTCAACTCCAGATGGAACAATTGTCAAGAAGTTTAGAGGTAATAATAGCGGTCAACCTTCTACCGTTGTGGATAATTCTCTCATGGTTGTCCTTGCTATGCATTACGCTCTCATTAAGGAGGGCGTTGAGTTTGAAGAAATCGACAGCACGTGTGTATTCTTTGTTAATGGTGATGACTTATTGATTGCTGTGAATCCGGAGAAAGAGAGCATTCTCGATAGAATGTCACAACATTTCTCAGATCTTGGTTTGAACTATGATTTTTCATCGAGAACAAGAAGGAAGGAGGAATTGTGGTTCATGTCCCACAGAGGCCTACTAATCGAGGGCATGTACGTGCCAAAGCTTGAAGAAGAGAGAATTGTATCCATTCTGCAATGGGATAGAGCTGATCTGCCAGAGCACAGATTAGAAGCGATTTGTGCAGCAATGATAGAATCCTGGGGTTATTTTAAGTTAACGCACCAAATCAGGAGATTCTACTCATGGTTGTTGCAACAGCAACCTTTTTCAACGATAGCGCAGGAAGGAAAAGCTCCATACATAGCGAGCATGGCATTGAAGAAGCTGTACATGGATAGGACGGTAGATGAGGAGGAACTGAAAGCTTTCACTGAAATGATG?GTTGCCTTGGATGATGAATTTGAGTGCGATACTTATGAAGTGCACCATCAAGGAAAT---------GACACAATCGATGCAGGAGGAAGCACTAAGAAAGATGCAAAACAAGAGCAAGGTAGCATTCAACCAAATCTCAACAAGGAAAAG---------------------------GAAAAGGACGTGAATGTTGGAACATCTGGAACTCACACTGTGCCACGAATTAAAGCTATCACGTCCAAAATGAGAATGCCCAAGAGTAAGGGTGCAACTGTACTAAATTTGGAACACTTACTCGAGTATGCTCCACAGCAAATTGACATCTCAAATACTCGAGCAACTCAATCACAGTTTGATACATGGTATGAAGCAGTACAACTTGCATACGACATAGGAGAAACTGAAATGCCAACTGTGATGAATGGGCTTATGGTTTGGTGCATTGAAAATGGAACCTCGCCAAATATCAATGGAGTTTGGGTTATGATGGATGGAGATGAACAAGTCGAATACCCACTGAAACCAATCGTTGAGAATGCAAAACCAACACTTAGGCAAATCATGGCACATTTCTCAGATGTTGCAGAAGCGTATATAGAAATGCGCAACAAAAAGGAACCATATATGCCACGATATGGTTTAGTTCGTAATCTGCGCGATGGAAGTTTGGCTCGCTATGCTTTTGACTTTTATGAAGTTACATCACGGACACCAGTGAGGGCTAGAGAGGCACACATTCAAATGAAGGCCGCAGCTTTAAAATCAGCTCAATCTCGACTTTTCGGATTGGATGGTGGCATTAGTACACAAGAGGAAAACACAGAGAGGCACACCACCGAGGATGTTTCTCCAAGTATGCATACTCTACTTGGAGTGAAGAACATGTGATTGTAGCGTCTTTCCGGACGATATATAGATATTTATG-TTTGCAGTAAGTATTTTGGCTTTTCCTGTACTACTTTTATCGTAATTAATAATC?GTTTGAATATTACTGGCAGATAGGGGTGGTATAGCGATTCCGTCGTTGC-AGTGACCTTAGCTGTCGTTTCTGTATTATT-------------------------------------------------------------------------------------------------------------------------------------------------------------------------------------------------------------------------------------ATGT?TTGTATAAAAGTGCCGGGTTGTTGTTGTTGTGGCTGATCTATCGATTAGGTGATGTTGCGATTCTGTCGTAACAGTGACTATGTCTGGATTTAGTTTACTTGGGTGATGCTGTGATTCTGTCATAGCAGTGACTG???????????????????
	NN300_41     ?????????????????????????????AAATCAACGCAAAAACACTCACAAAAGCTTTCAATTCTAACTCAAGCAATTTGTTAAGTTTCAACTTTGATCTTCGTCGTACAGACCGTTTCAACTTCAGTGTAAGTTCTCGTAACTCAATAGTTTATTTCAAACCCTCTCAAATAGCAACATACCAGCCATGGCAACTTACATGTCAACGATTCAATTCGGTTCCATTGAATGCAAACTTCCATACTCACCCGCCCCTTTTGAGCTAGTTGCGAGGGAACGAGAAGTTTCAACC-------------------------------------------------------------------------------------------------------------------------------------------------------------------------------------------------------------------------------------------------------------------------------------------------------------------------------------------------------------------------------------------------------------------------------------------------------------------------------------------------------------------------------------------------------------------------------------------------------------------------------------------------------------------------------------------------------------------ATCACCGACCCCTTCGCAGGTTTGGAGATGCAGCTTAGTACGCGACTACGAAGGCAAGAGTTCGCGACTGTCCGTACATCCAAGAGTGGCACCTGCATGTATCGATACAAGACTGATGTCCAGATTGCGCGCATCCAAAAGAAGCGCGAGGAAAGAGAAAGAGAAGAACACAACTTCCAAATGGCTGCACCGAGTGTTGTGTCGAAGATTACTATTGCTGGTGGAGAGCCACCTTCGAAACTTGAATCACAAGTGCAGAGGGGTGTCATCCACACAACTCCAAGAATGCGTACAGTGAAAACATATCACACGCCAAAGTTGACAGAGAAACAAATGAACCATCTTATCAAGCAGGTAAAGCAAATCATGTCAACTAAAGGAGGATCTGTTCAACTGATTAGCAAGAAAAGTACCCATGTTCAATATAAAGAAGTTTTGGGAGCACATCGCGCAGTCGTTTGCACTGCA?CATATGAGAGGTTTACGAGAGAGAGTAGACTTTCGGTGTGATA?GTGGACTGTTATGTGTCTGAAGCATCTCGCAAGGACGGACAAGTGGACTAACCAAGTTCGTGCTACTGATCTACGAAAGGGCGATAGTGGAGTTATATTGAGTAATACTAATCTCAAAGGGTACTTTGGGAGAAGTTCGGAGGGTCTATTTATAGTGCGTGGATCGCATGAAGGAAAAATCTATGATGCGCGTTCCAAGGTTACACAAGGAGTTCTAGACTCAATGGTTCAGTTCTCAAACGCTGAAAGCTTCTGGAAGGGATTGGACGGCAATTGGGCACGGATGAGATACCCTACAGATCATACATGCGTAGCAGGCTTACCAGTTGAAGACTGTGGCAGAGTAGCAGCAATAATGACACACAGTATTCTACCGTGCTATAAGATAACCTGCCCCACCTGTGCTCAACAGTATGCCAACTTGCCAGCCAGTGATTTGCTCAAAGTATTACACAGGCACGCGAGTGATGGTTTAAGTCGATTGGGAGCGGATAAAGATCGCTTTGTGCATGTCAGCAAGTTCTTGACAGTCCTAGAGCACTTGACTGAACCAGTTGATCTAAATCTAGAAATCTTCAATGAAGTATTCAAGTCTATAGGAGAGAAGCAACAATCACCTTTCAAAAACCTGAATATTCTGAATAATTTCTTTTTGAAAGGAAAGGAGAATACAGCTCGTGAATGGCAAGTGGCTCAATTAAGCTTACTTGAATTGGCAAGATTCCAAAAGAACAGGACGGATAATATCAAGAAAGGTGACATCTCGTTCTTCAGGAATAAGCTATCCGCCAAAGCAAATTGGAACTTGTATCTGTCATGCGATAATCAGTTGGATAAGAACGCAAACTTCCTGTGGGGACAGAGGGAATATCATGCCAAGCGGTTTTTCTCGAACTTTTTCGAGGAAATTGATCCAGCGAAGGGCTACTCAGCGTACGAAATTCGTTTGCATCCGAATGGGAGAAGAAAACTTGCAATTGGAAACCTAATTGTTCCACTCGATCTGGCTGAGTTTAGGCGGAAGA?GAAAGGTGATTATAAAAGACAGCCAGGGGTGAGTAAGAAGTGCACGAGCTCGAAGGATGGAAACTACGTGTATCCCTGTTGTTGTACTACACTCGATGATGGCTCAGCTGTTGAATCAACATTTTACCCGCCAACTAAAAAGCATCTTGTAATAGGTAACAGCGGTGATCAAAAGTATGTTGATCTACCAAAAGGGAATTCTGAAATGTTATACATTGCCAGGCAAGGGTTTTGTTATATTAATATATTCCTTGCGATGTTGATTAACATTAGTGAGGAAGATGCAAAGGATTTCACGAAGAAGGTTCGTGACATGTGTGTGCCAAAGCTTGGAACCTGGCCAACCATGATGGATCTGGCTACTACTTGTGCTCAAATGAAAATATTCTACCCTGATGTTCATGATGCAGAGCTGCCCAGAATACTAGTTGACCATGAGACTCAGACATGCCATGTGGTCGACTCGTTTGGTTCGCAAACAACTGGTTATCACATTTTAAAGGCATCTAGCGTGTCTCAGCTTATCTTGTTTGCAAACGATGAGTTGGAATCTGACATTAAGCACTATAGAGTTGGTGGTATTCCTGGGGCATGTCCTGAGCTCGGATCCACGAT-ATCACCTTTCAGAGAAGGAGGAATCATAATGTCTGAGTCAGCAGCACTGAAACTGCTTTTAAAGGGTATCTTTAGACCCAAGGTGATGAGACAGTTACTATTAGATGAACCATATCTGCTCATTCTTTCGATATTGTCCCCTGGCATACTCATGGCTATGTACAATAATGGGATTTTTGAGCTTGCAGTGAAGTTGTGGATTAATGAAAAGCAATCTGTAGCCATGATAGCATCGTTATTGTCCGCCTTAGCTTTACGAGTGTCAGCAGCAGAAACACTCGTTGCACAGAGGATTATAATTGACACGGCAGCAACAGATCTTCTCGATGCTACGTGTGATGGATTCAATTTAAATCTGACATATCCCACTGCACTAATGGTGTTGCAAGTTGTTAAGAACAGAAATGAATGTGATGATACGTTGTTTAAGGCAGGTTTTTCACATTACAACATGAGTGTCGTGCAGATTATGGAAAAAAATTATCTAAGCCTCTTGGGCGATGCATGGAAAGATTTAACCTGGCGAGAAAAATTATCCGCAACATGGCACTCATACAAAGCAAAGCGCTCTATCACTCAGTTCATAAAACCCATAGGCAAAGCAGATTTAAAAGGGTTGTACAACATATCACCGCAAGCATTCTTGGGTCAGGGCGTACAGAGAGTCAAAGGCACCGCCTCAGGGTTGAATGAGCGACTCAATAATTATATCAATACTAAGTGTGTAAATATTTCATCCTTTTTCATTCGTAGAATTTTCCGGCGCTTGCCAACTTTTGTAACTTTCATTAATTCATTATTAGTCATTAGTATGCTAACTAGTGTAGTAGCAGTGTGTCAAGCAATAATTCTAGATCAAAGGAAGTATAGAAAGGAAATTGAGTTGATGCAGATTGAGAAGAATGAAATTGTTTGTATGGAGTTGTATGCGAGTCTGCAGCGCAAACTTGAGCGTGAATTCACATGGGATGAATATATGGAATATTTGAAATCTGTGAATCCCCAGATAGTTCAATTCGCGCAAGCTCAAATGGAAGAATATAATGTGCGGCATCAGCGCTCCACACCAGGTGTTAAGAATTTAGAGCAGGTGGTAGCATTTATAACTCTAATTATCATGATGTTTGATGCtGAAAGGAGCGACTGTGTATTTAAGACTCTCAACAAATTCAAGGGCATCGTTTCTTCAATGGATCATGAAGTTAGACACCAATCCTTGGATGATGTAATCAAGAATTTCGACGAAAGGAACGAAGTTATTGATTTTGAGCTAAATGAGGACACAATTAAAACATCATCAGTGTTGGACACAAAGTTTAGCGACTGGTGGGATCGGCAAATCCAAATGGGACACACACTTCCCCACTATAGAACTGAGGGACACTTCATGGAATTCACAAGGGCAACTGCTGTGCAAGTGGCCAATGACATCGCGCATAGTGAGCACCTAGATTTTCTAGTGAGGGGAGCTGTTGGGTCTGGAAAATCTACTGGACTGCCTGTTCATCTCAGTGCAGCTGGGTCCGTGCTTTTGATAGAACCAACTCGACCACTTGCAGAAAACGTGTTCAAGCAGTTATCCAGTGAACCGTTTTTCAAGAAGCCAACACTGCGCATGCGAGGAAATAGTGTGTTTGGTTCCTCTCCAATTTCCATCATGACTAGCGGCTTTGCGTTGCACTACTATGCTAATAATCGCTCTCAGCTAACTCAGTTTAATTTCATAATTTTTGATGAATGTCATGTTCTAGATCCTTCTGCAATGGCATTTCGTAGCTTGTTAAGTGTGTATCACCAAACATGCAAAGTGTTAAAGGTATCAGCCACTCCAGTGGGAAGGGAGGTCGAGTTCACAACACAACAACCAGTTAAATTGGTAGTTGAGGATACACTTTCATTCCAATCTTTTGTTGATGCGCAAGGCTCAAAAACCAATGCCGACGTTGTTCAGCATGGTTCGAACATACTCGTGTATGTGTCGAGTTACAATGAAGTGGATACATTAGCCAAGCTTCTAACGGATAGGAATATGGTCGTCTCAAAAGTTGATGGCAGAACAATGAAGCACGGATGCTTAGAAATTGTAACGAAAGGGACTAGTGCAAAGCCACATTTTGTCGTAGCAACCAACATTATTGAAAATGGAGTAACTTTAGATATAGATGTAGTTGTAGATTTTGGGCTTAAAGTCTCACCGTTTTTAGATATTGACAATAGGAGCATTGCATACAATAAGATTAGTGTTAGCTATGGAGAAAGAATTCAGAGGTTGGGTCGTGTTGGGCGCTTTAAGAAGGGAGTGGCATTGCGTATTGGGCACACTGAAAAGGGAATTATTGAGATTCCAAGTATGATTGCTAGTGAAGCCGCGCTTGCGTGCTTTGCATACAATTTGCCAGTAATGACAGGGGGTGTTTCAACTAGCCTCATTGGCAATTGTACTGTTCGTCAAGTTAAAACTATGCAACAATTTGAGCTGAGTCCATTCTTTATACAAAATTTTGTTGCCCATGATGGATCAATGCATCCTGTCATACATGACATTCTTAAGAAGTATAAACTGCGAGATTGTATGACGCCCTTGTGTGATCAATCCATACCTTACAGAGCCTCAAGCACTTGGTTGTCTGTTGGTGAGTACGAACGACTCGGAGTGGTTTTGGACATTCCAAAACAGATCAAGATTGCATTCCACATCAAGGATATCCCTCCTAAGTTGCATGAAATGCTTTGGGAAACAGTTATTAAATATAAGGATGTGTGTTTGTTTCCAAGTATT-CGGGCTTCATCCATTAGCAAAATTGCATACACACTGCGCACTGATCTTTTTGCAATCCCCAGAACCCTAATTCTAGTTGAAAGATTGCTCGAGGAGGAACGAGTGAAACAGAGCCAATTTAGAAGTCTCATTGATGAAGGATGCTCAAGTATGTTTTCAATTGTTAATTTAACAAACACTCTTAGAGCTAGATATGCAAAGGATTACACTGCAGAAAACATACAGAAGCTCGAGAAAGTGAGGAGTCAGTTAAAGGAGTTCTCAAATTTAAATGGCTCTGCATGCGAGGAGAACTTAATGAAGAGGTATGAATCTCTACAGTTTGTGCATCATCAAGCAACAACTTCACTCGCAAAGGATTTGAAGTTGAAAGGAGTTTGGAAGAAGTCACTAGTTGTGCAGGACCTACTCATAGCGGGTGCCGTTGCTATCGGTGGAATAGGGCTAATCTATAGTTGGTTTACTCAATCAGTTGAAACTGTGTCTCACCAGGGCAAGAACAAATCCAAAAGAATTCAAGCATTGAAGTTTCGACATGCCCGCGATAAGAGGGCTGGCTTTGAAATTGATAACAATGATGATACAATAGAAGAATTCTTTGGATCTGCATACAGGAAGAAGGGAAAAGGTAAAGGCACCACTGTTGGTATGGGCAAGTCAAGCAGGAGGTTTGTTAATATGTATGGATTCGACCCAACAGAATATTCATTCATCCAGTTCGTTGATCCGCTCACTGGAGCTCAAATTGAAGAGAACGTCTATGCTGATATTAGAGACATCCAAGAGCGCTTTAGTGATGTCCGCAGGAAAATGGTAGAGGATGATGAAATCGAATTGCAAGCATTGAGCAGCAACACAAACATTCATGCTTACTTCAGGAAAGATTGGTCTGACAAGGCTCTAAAAATTGATTTGATGCCACACAACCCACTCAAAATCTGCGATAAATCGAATGGCATTGCTAAGTTTCCTGAAAGAGAATTTGAGTTGAGGCAAACTGGGCCAGCAATAGAGGTTGATGTGAAAGACATCCCAAAACAGGAAGTGGAGCATGAAGCCAAATCACTCATGAGAGGTTTAAGGGATTTCAATCCAATTGCTCAAACAGTTTGCAGAGTAAAAGTGTCTGTTGAGTATGGAACGTCTGAAATGTATGGGTTCGGTTTTGGTGCGTATATTATAGTAAACCACCATCTATTCAAGAGTTTCAATGGATCCATGGAAGTGCGATCAATGCATGGAACATTCAGAGTGAAGAATTTGCATAGCTTGAGTGTTTTACCGATCAAAGGCAGAGACATTATCATCATAAAGATGCCGAAGGACTTCCCTGTTTTCCCACAAAAACTGCACTTCCGAGCTCCAATACAAAATGAGAGGATTTGTTTGGTTGGAACTAACTTTCAAGAAAAACATGCATCGTCAATCATCACAGAAACGAGTACTACATACAATGTGCCGGGCAGCACTTTTTGGAAGCATTGGATTGAAACAAATGATGGGCATTGTGGATTACCAGTAGTGAGTACAGCTGATGGATGTCTGGTTGGAATACACAGCTTGGCGAATAATGTGCAAACCACGAATTATTATTCAGCTTTTGATGAGGATTTTGAAAGCAAGTATCTCCGAACTAATGAACATAATGAGTGGACCAAATCGTGGGTATATAACCCAGATACTGTGTTGTGGGGTCCATTGAAGCTCAAGGAGAGTACCCCTAAAGGCTTGTTTAAGACAACAAAACTCGTACAGGATTTAAT------TGATCATGATGTTGTTGTAGAGCAAGCTAAACATTCTGCGTGGATGTATGAGGCTCTAACTGGGAATTTGCAAACTGTGGCGACAATGAAGAGTCAGCTAGTGACAAAGCACGTGGTCAAAGGGGAGTGTCGGCACTTCAAAGAGTTCTTAACTGTGGATTCGGAAGCAGAAGCT------TTCTTCAGGCCTTTGATGGATGCTTATGGGAAGAGCTTATTAAATAGAGAAGCATATATAAAGGACATAATGAAATACTCAAAGCCTATTGATGTTGGAATAGTAGACTGCGAT--GCTTTTGAAGAGGCTATCAATAGGGTTATCATTTATCTGCAA-GTGCATGGTTTCCAGAAATGCAATTACATCACTGATGAGCAGGAAATTTTCAAAGCTCTCAATATGAAAGCTGCTGTCGGAGCTATGTATGGAGGCAAGAAGAAAGACTACTTTGAGCATTTTACTGAGGCGGATAAAGAGGAAATTGTTATGCAAAGTTGCTTGCGATTGTACAAGGGCTCGCTTGGCATATGGAATGGATCATTGAAAGCAGAACTTCGGTGCAAAGAGAAGATACTTGCAAATAAGACAAGGACATTCACTGCTGCACCTTTAGATACTCTACTGGGTGGAAAGGTGTGCGTTGATGATTTTAATAATCAATTCTACTCAAAGAACATTGAATGCTGCTGGACTGTTGGAATGACTAAGTTTTATGGAGGTTGGGACAAATTGCTTCGGCGTCTACCTGAAAATT---GGGTGTACTGCGATGCTGATGGTTCACAATTCGATAGTTCACTCACCCCATACCTAATTAATGCTGTTCTCATCATCAGAAGCACATACATGGAAGATTGGGAATTGGGGTTGCAAATGTTGCGCAATTTGTACACAGAAATAATTTACACACCAATCTCAACTCCAGATGGAACAATTGTCAAGAAGTTTAGAGGTAATAATAGCGGTCAACCTTCTACCGTTGTGGATAATTCTCTCATGGTTGTCCTTGCCATGCATTACGCTCTCATTAAGGAGGGCGTTGAGTTTGAAGAAATCGACAGCACGTGTGTATTCTTTGTTAATGGTGATGACTTATTGATTGCTGTGAATCCGGAGAAAGAGAGCATTCTCGATAGGATGTCACAACATTTCTCAGATCTTGGTTTGAACTATGATTTTTCATCGAGAACAAGAAGGAAGGAGGAATTGTGGTTCATGTCCCACAGAGGCCTGCTAATCGAGGGCATGTACGTGCCAAAGCTTGAAGAAGAGAGAATTGTATCCATTCTGCAATGGGATAGAGCTGATCTGCCAGAGCACAGATTAGAAGCGATTTGTGCAGCAATGATAGAATCCTGGGGTTATTTTAAGTTAACGCACCAAATCAGGAGATTCTACTCATGGTTGTTGCAACAGCAACCTTTTTCAACGATAGCGCAGGAAGGAAAAGCTCCATACATAGCGAGCATGGCATTGAAGAAGCTGTACATGGATAGGACGGTAGATGAGGAGGAACTGAAAGCTTTCACTGAAATGATG?GTTGCCTTGGATGATGAATTTGAGTGCGATACTTATGAAGTGCACCATCAAGGAAAT---------GACACAATCGATGCAGGAGGAAGCACTAAGAAAGATGCAAAACAAGAGCAAGGTAGCATTCAACCAAATCTCAACAAGGAAAAG---------------------------GAAAAGGACGTGAATGTTGGAACATCTGGAACTCACACTGTGCCACGAATTAAAGCTATCACGTCCAAAATGAGAATGCCCAAGAGTAAGGGTGCAACTGTACTAAATTTGGAACACTTACTCGAGTATGCTCCACAGCAAATTGACATCTCAAATACTCGAGCAACTCAATCACAGTTTGATACATGGTATGAAGCAGTACAACTTGCATACGACATAGGAGAAACTGAAATGCCAACTGTGATGAATGGGCTTATGGTTTGGTGCATTGAAAATGGAACCTCGCCAAATATCAATGGAGTTTGGGTTATGATGGATGGAGATGAACAAGTCGAATACCCACTGAAACCAATCGTTGAGAATGCAAAACCAACACTTAGGCAAATCATGGCACATTTCTCAGATGTTGCAGAAGCGTATATAGAAATGCGCAACAAAAAGGAACCATATATGCCACGATATGGTTTAATTCGTAATCTGCGCGATGGAAGTTTGGCTCGCTATGCTTTTGACTTTTATGAAGTTACATCACGGACACCAGTGAGGGCTAGAGAGGCACACATTCAAATGAAGGCCGCAGCTTTAAAATCAGCTCAATCTCGACTTTTCGGATTGGATGGTGGCATTAGTACACAAGAGGAAAACACAGAGAGGCACACCACCGAGGATGTTTCTCCAAGTATGCATACTCTACTTGGAGTCAAAAACATGTGATTGTAGCGTCTTTCCGGACGATATATAGATATTTATG-TTTGCAGTAAGTATTTTGGCTTTTCCTGTACTACTTTTATCGTAATTAATAATC?GTTTGAATATTACTGGCAGATAGGGGTGGTATAGCGATTCCGTCGTTGC-AGTGACCTTAGCTGTCGTTTCTGTATTATT-------------------------------------------------------------------------------------------------------------------------------------------------------------------------------------------------------------------------------------ATGT?TTGTATAAAAGTGCCGGGTTGTTGTTGTTGTGGCTGATCTATCGATTAGGTGATGTTGCGATTCTGTCGTAACAGTGACTATGTCTGGATTTAGTTTACTTGGGTGATGCTGTGATTCTGTCATAGCAGTG???????????????????????
	NTND6        AAATTAAAACAACTCAATACAACATAAGAAAATCAACGCAAAAACAATCACAAAAGCTTTCAATTCTAACTCAAGCAATTTGTTAAGTTTCAACTTTGATCTTCGTCGTACAAACCGTTTCAACTTCAGTGTAAGTTCTCGTAACTCAATAGTTTATTTCAAACTCTCTTATATAGCAACATACCAGCCATGGCAACTTACATGTCAACGATTCAATTCGGTTCCATTGAATGCAAACTTCCATACTCACCCGCCCCTTTTGAGCTAGTTGCGAGGGAACGAGAAGTTTCAACC-------------------------------------------------------------------------------------------------------------------------------------------------------------------------------------------------------------------------------------------------------------------------------------------------------------------------------------------------------------------------------------------------------------------------------------------------------------------------------------------------------------------------------------------------------------------------------------------------------------------------------------------------------------------------------------------------------------------ATCACTGACCCCTTCGCAGGTTTGGAGATGCAGCTTAGTGCGCGACTACGAAGGCAAGAGCTTGCGACTGTCCGTACATCCAAGAGTGGTACCTGCATGTATCGATACAAGACTGATGTCCAGATTGCGCGCATCCAAAAGAAGCGCGAGGAAAGAGAAAGAGAAGAACACAACTTCCAAATGGCTGCACCAAGTGTTGTGTCAAAGATTACTATTGCTGGTGGAGAGCCACCTTCGAAACTTGAATCACAAGTGCAGAGGGGTGTCATCCACACAACTCCAAGAATGCGTACAGTGAAAACATATCACACGCCAAAGTTGACAGAGAAACAAATGAACCATCTTATCAAGCAGGTAAAGCAAATCATGTCAACTAAAGGAGGGTCTGTTCAACTGATTAGCAAGAAAAGTACCCATGTTCAATATAAAGAAGTTTTGGGAGCACATCGCGCAGTCGTTTGCACTGCA?CATATGAGAGGTTTACGAAAGAGAGTAGACTTTCAGTGTGATAAGTGGACTGTTATGTGTCTGAAGCATCTCGCAAGGACGGACAAGTGGACTAACCAAGTTCGTGCTACTGATCTACGAAAGGGCGATAGTGGAGTTATATTGAGCAATACTAATCTCAAAGGATACTTTGGGAGAAGTTCGGAGGGTCTATTTATAGTGCGTGGATCGCATGAAGGAAAAATCTATGATGCGCGTTCCAAGGTCACACAAGGAGTTCTAGACTCAATGGTTCAGTTCTCAAACGCTGAAAGCTTCTGGAAGGGATTGGACGGCAATTGGGCACGGATGAGATACCCTACAGATCATACATGCGTAGCAGGCTTACCAGTTGAAGACTGTGGCAGAGTAGCAGCAATAATGACACACAGTATTCTACCGTGCTATAAAATAACCTGCCCCACTTGTGCTCAACAGTATGCTAACTTGCCAGCCAGTGATTTGCTCAAAGTATTACACAGGCACGCAAGTGATGGTTTAAGTCGATTGGGAGCGGATAAAGATCGCTTTGTGCATGTCAGCAAGTTCTTGACAGTCCTAGAGCACTTGACTGAACCAGTTGATCTAAATCTAGAAATCTTCAATGAAGTATTCAAGTCTATAGGAGAGAAGCAACAATCACCTTTCAAAAACCTGAATATTCTGAATAATTTCTTTTTGAAAGGCAAGGAGAATACAGCTCGTGAATGGCAAGTGGCTCAATTAAGCTTACTTGAATTGGCAAGATTCCAAAAGAACAGGACGGATAATATCAAGAAAGGTGACATCTCGTTCTTCAGGAATAAGCTATCCGCCAAAGCAAATTGGAACTTGTATCTGTCATGCGATAATCAGTTGGATAAGAACGCAAACTTCCTGTGGGGACAGAGGGAATATCATGCCAAGCGGTTTTTCTCGAACTTTTTCGAGGAAATTGATCCAGCGAAGGGCTACTCAGCGTACGAAACTCGTTTGCATCCGAATGGGAGAAGAAAACTTGCAATTGGAAACCTAATTGTTCCACTCGATCTGGCTGAGTTTAGGCGGAAGATGAAAGGTGATTATAAAAGACAGCCAGGGGTGAGTAAGAAGTGCACGAGCTCGAAGGATGGAAACTACGTGTATCCCTGTTGTTGTACTACACTCGATGATGGCTCAGCTGTTGAATCAACATTTTACCCGCCAACTAAAAAGCATCTTGTAATAGGTAACAGCGGTGATCAAAAGTATGTTGATCTACCAAAAGGGAATTCTGAAATGTTATACATTGCCAGGCAAGGGTTTTGTTATATTAATATATTCCTTGCGATGTTGATTAACATTAGTGAGGAAGATGCAAAGGATTTCACGAAGAAGGTTCGTGACATGTGTGTGCCAAAGCTTGGAACCTGGCCAACCATGATGGATCTGGCTACTACTTGTGCTCAAATGAAAATATTCTACCCTGATGTTCATGATGCAGAGCTGCCCAGAATACTAGTTGACCATGAAACTCAGACATGCCATGTGGTCGACTCGTTTGGTTCGCAAACAACTGGTTATCATATTTTAAAGGCATCTAGCGTGTCTCAGCTTATCTTGTTTGCAAACGATGAGTTGGAATCTGACATTAAGCACTATAGAGTTGGTGGTATTCCTGGGGCATGTCCTGAGCTCGGATCCACAAT-ATCACCTTTCAGAGAAGGAGGAATCATAATGTCTGAGTCAGCAGCACTGAAACTGCTTTTAAAGGGTATCTTTAGACCCAAGGTGATGAGACAGTTACTATTAGATGAACCATATCTGCTCATTCTTTCGATATTGTCCCCTGGCATACTCATGGCTATGTATAATAATGGGATTTTTGAGCTTGCAGTGAAGTTGTGGATTAATGAAAAGCAATCTGTAGCCATGATAGCATCGTTATTGTCCGCCTTAGCTTTACGAGTGTCAGCAGCAGAAACACTCGTTGCACAGAGGATTATAATTGACACGGCAGCAACAGATCTTCTCGATGCTACGTGTGATGGATTCAATTTAAATCTGACATATCCCACTGCACTCATGGTGTTGCAAGTTGCTAAGAACAGAAATGAATGTGATGATACGTTGTTTAAGGCAGGTTTTTCACATTACAACATGAGTGTCGTGCAGATTATGGAAAAAAATTATCTAAGCCTCTTGGGCGATGCATGGAAAGATTTAACCTGGCGAGAAAAATTATCCGCAACATGGCACTCATACAAAGCAAAGCGCTCTATCACTCAGTTCATAAAACCCATAGGCAAAGCAGATTTAAAAGGGTTGTACAACATATCACCGCAAGCATTCTTGGGTCAGGGCGTACAGATAGTCAAAGGCACCGCCTCAGGGTTGAATGAGCGACTCAATAATTATATCAATACTAAGTATGTAAATATTTCATCCTTTTTCATTCGTAGAATTTTCCGGCGCTTGCCAACTTTTGTAACTTTCATTAATTCATTATTAGTCATTAGTATGCTAACTAGTGTAGTAGCAGTGTGTCAAGCAATAATTCTAGATCAAAGGAAGTATAGAAGGGAAATTGAGTTGATGCAGATTGAGAAGAATGAAATTGTTTGTATGGAGTTGTATGCGAGTCTGCAGCGCAAACTTGAGCGTGAATTCACATGGGATGAATATATGGAATATTTGAAATCTGTGAATCCCCAGATAGTTCAATTCGCGCAAGCTCAAATGGAAGAATATAATGTGCGGCATCAGCGCTCCACACCAGGTGTTAAGAATTTAGAGCAGGTGGTAGCATTTATAACTCTAATTATCATGATGTTTGATGCTGAAAGGAGCGACTGTGTATTTAAGACTCTCAACAAATTTAAGGGCATCGTTTCTTCAATGGATCATGAAGTTAGACACCAGTCCTTGGATGATGTAATCAAGAATTTCGATGAAAGGAACGAAGTTATTGATTTTGAGCTAAATGAGGATACAATTAAAACATCATCAGTGTTGGACACAAAGTTTGGCGACTGGTGGGATCGGCAAATCCAAATGGGACACACACTTCCCCACTATAGAACTGAGGGACACTTCATGGAATTCACAAGGGCAACTGCTGTGCAAGTGGCCAATGACATCGCGCATAGTGAGCACCTAGATTTTCTAGTGAGGGGAGCTGTTGGGTCTGGAAAATCTACTGGACTGCCTGTTCATCTCAGTGCAGCTGGATCCGTGCTTTTGATAGAACCAACTCGACCACTTGCAGAAAACGTGTTCAAGCAGTTATCCAGTGAACCGTTTTTCAAGAAGCCAACACTGCGCATGCGAGGAAATAGTGTGTTTGGTTCCTCTCCAATTTCCATCATGACTAGCGGCTTTGCGTTGCACTACTATGCTAATAATCGCTCTCAGCTAACTCAGTTTAATTTCATAATTTTTGATGAATGTCATGTTCTAGATCCTTCTGCAATGGCATTTCGTAGCTTGTTAAGTGTGTATCACCAAACATGCAAAGTGTTAAAGGTATCAGCCACTCCAGTGGGAAGGGAGGTCGAGTTCACAACACAACAACCAGTTAAATTGGTGGTTGAGGATACACTTTCATTCCAATCTTTTGTTGATGCGCAAGGCTCAAAAACCAATGCTGACGTTGTTCAGCATGGTTCGAACATACTCGTGTATGTGTCGAGTTACAATGAAGTGGATGCATTAGCCAAGCTTCTAACGGATAGGAATATGGTTGTCTCAAAAGTTGATGGCAGAACAATGAAGCACGGATGCTTAGAAATTGTAACGAAAGGGACTAGTGCAAAGCCACATTTTGTCGTAGCAACCAACATTATTGAAAATGGAGTAACTTTAGATATAGATGTAGTTGTAGATTTTGGGCTTAAAGTCTCACCGTTTTTAGATATTGACAATAGGAGCATTGCATACAATAAGATTAGTGTTAGCTATGGAGAAAGAATTCAGAGGTTGGGTCGTGTTGGGCGCTTTAAGAAGGGAGTGGCATTGCGTATTGGGCACACCGAAAAGGGAATTATTGAGATTCCAAGTATGATTGCTAGTGAAGCTGCGCTTGCGTGCTTTGCATATAATTTGCCAGTAATGACAGGGGGTGTTTCAACTAGCCTCATTGGCAATTGTACTGTTCGTCAAGTTAAAACTATGCAACAATTTGAGCTGAGTCCATTCTTTATACAAAATTTTGTTGCCCATGATGGATCAATGCATCCTGTCATACATGACATTCTTAAGAAGTATAAACTGCGAGATTGTATGACGCCCTTGTGTGATCAATCCATACCTTACAGAGCCTCAAGCACTTGGTTGTCTGTTGGTGAGTACGAACGACTCGGAGTGGTTTTGGACATTCCAAAACAGATCAAGATTGCATTCCACATCAAGGACATCCCTCCTAAGTTGCATGAAATGCTTTGGGAAACAGTTATTAAATATAAGGATGTGTGTTTGTTTCCAAGTATT-CGGGCTTCATCCATTAGCAAAATTGCATACACACTGCGCACTGATCTTTTTGCAATCCCCAGAACCCTAATTCTAGTTGAAAGATTGCTCGAGGAGGAACGAGTGAAACAGAGCCAATTTAGAAGTCTCATTGATGAAGGATGCTCAAGTATGTTTTCAATTGTTAATTTAACAAACACTCTTAGAGCTAGATATGCAAAGGATTACACTGCAGAAAACATACAGAAGCTCGAGAAAGTGAGGAGTCAGTTAAAGGAGTTCTCAAATTTAAATGGCTCTGCATGCGAGGAGAACTTAATGAAGAGGTATGAATCTCTACAGTTTGTGCATCATCAAGCAACAACTTCACTCGCAAAGGATTTGAAGTTGAAAGGAGTTTGGAAGAAGTCACTAGTTGTGCAGGACCTACTCATAGCGGGTGCCGTCGCTATCGGTGGAATAGGGCTTATCTATAGTTGGTTTACTCAATCAGTTGAAACTGTGTCTCACCAGGGCAAGAACAAATCCAAAAGAATTCAAGCATTGAAGTTTCGACATGCCCGCGATAAGAGGGCTGGCTTTGAAATTGATAACAATGATGATACAATAGAAGAATTCTTTGGATCTGCATACAGGAAGAAGGGGAAAGGTAAAGGCACCACTGTTGGTATGGGCAAATCAAGCAGGAGGTTTATTAATATGTATGGATTCGACCCAACAGAATATTCATTCATCCAGTTCGTTGATCCGCTCACTGGAGCTCAAATTGAAGAGAACGTCTATGCTGATATTAGAGACATCCAAGAGCGCTTTAGTGATGTCCGCAAGAAAATGGTAGAGGATGATGAAATCGAATTGCAAGCATTGAGCAGCAACACAAACATTCATGCTTACTTCAGGAAAGATTGGTCTGACAAGGCTCTTAAAATTGATTTGATGCCACACAACCCACTCAAAATCTGCGATAAATCGAATGGCATTGCTAAGTTTCCTGAAAGAGAATTTGAGTTGAGGCAAACTGGGCCAGCAATAGAGGTTGATGTGAAAGACATTCCAAAACAGGAAGTGGAGCATGAAGCCAAATCACTCATGAGAGGTTTAAGGGATTTCAATCCAATTGCTCAAACAGTTTGCAGAGTAAAAGTGTCTGTTGAATATGGAACTTCTGAAATGTATGGGTTCGGTTTTGGTGCGTATATTATAGTAAACCACCATCTATTCAAGAGTTTCAATGGATCCATGGAAGTGCGATCAATGCATGGAACATTCAGAGTGAAGAATTTGCATAGCTTGAGTGTTTTACCGATCAAAGGCAGAGACATTATCATCATACAGATGCCAAAGGACTTCCCTGTTTTCCCACAAAAACTGCACTTCCGAGCTCCAATACAAAATGAGAGGATTTGTTTGGTTGGAACTAACTTTCAAGAAAAATATGCATCGTCAATCATCACAGAAACGAGTACTACATACAATGTACCGGGCAGCACTTTTTGGAAGCATTGGATTGAAACAAATGATGGGCATTGTGGATTACCAGTAGTGAGTACAGCTGATGGATGTCTGGTTGGAATACACAGCTTGGCGAATAATGTGCAAACCACGAATTATTATTCAGCTTTTGATGAGGATTTTGAAAGCAAGTATCTCCGAACTAATGAACACAATGAGTGGACCAAATCGTGGGTATATAACCCAGATACTGTGTTGTGGGGTCCATTGAAGCTCAAGGAGAGTACCCCTAAAGGCTTGTTTAAGACAACAAAACTCGTACAGGATTTAAT------TGATCATGATGTTGTTGTAGAGCAAGCTAAACATTCTGCGTGGATGTATGAGGCTCTAACAGGGAATTTGCAAGCTGTGGCGACAATGAAGAGTCAGCTAGTGACAAAGCACGTGGTCAAAGGGGAGTGTCGGCACTTCAAAGAGTTCTTAACTGTGGATTCGGAAGCAGAAGCT------TTCTTCAGGCCTTTGATGGATGCTTATGGGAAGAGCTTATTAAATAGAGAAGCATATATAAAGGACATAATGAAATACTCAAAGCCTATTGATGTTGGAATAGTAGACTGCGAT--GCTTTTGAAGAGGCTATCAATAGAGTTATCATTTATCTGCAA-GTGCATGGTTTCCAGAAATGCAATTACATCACCGATGAGCAGGAAATTTTCAAAGCTCTCAATATGAAAGCTGCTGTCGGAGCTATGTATGGAGGCAAGAAGAAAGACTACTTTGAGCATTTTACTGAGGCGGATAAAGAGGAAATTGTTATGCAAAGTTGCTTGCGATTGTACAAGGGCTCGCTTGGCATATGGAATGGATCATTGAAAGCAGAACTTCGGTGCAAAGAGAAGATACTTGCAAATAAGACAAGGACATTCACTGCTGCACCTTTAGATACTCTACTGGGTGGAAAGGTGTGCGTTGATGATTTTAATAATCAATTCTACTCAAAGAACATTGAATGCTGCTGGACTGTTGGAATGACTAAGTTTTATGGAGGTTGGGACAAATTGCTTCGGCGTCTACCTGAAAATT---GGGTGTACTGCGATGCTGATGGTTCACAATTCGATAGTTCACTCACCCCATACCTAATTAATGCTGTTCTCATCATCAGAAGCACATACATGGAAGATTGGGAATTGGGGTTGCAAATGTTGCGCAATTTGTACACAGAAATAATTTACACACCAATCTCAACTCCAGATGGAACAATTGTCAAGAAGTTTAGAGGTAATAATAGCGGTCAACCCTCTACCGTTGTGGATAATTCTCTCATGGTTGTCCTTGCTATGCATTACGCTCTCATTAAGGAGGGCGTTGAGTTTGAAGAAATCGACAGCACGTGTGTATTCTTTGTTAATGGTGATGACTTATTGATTGCTGTGAATCCGGAGAAAGAGAGCATTCTCGATAGAATGTCACAACATTTCTCAGATCTTGGTTTGAACTATGATTTTTCATCGAGAACAAGAAGGAAGGAGGAATTGTGGTTCATGTCCCACAGAGGCCTGCTAATCGAGGGCATGTACGTGCCAAAGCTTGAAGAAGAGAGAATTGTATCCATTCTGCAATGGGATAGAGCTGATCTGCCAGAGCACAGATTAGAAGCGATTTGTGCAGCAATGATAGAATCCTGGGGTTATTTTAAGTTAACGCACCAAATCAGGAGATTCTACTCATGGTTGTTGCAACAGCAACCTTTTTCAACGATAGCGCAGGAAGGAAAAGCTCCATACATAGCGAGCATGGCATTGAAGAAGCTGTACATGGATAGGACAGTAGATGAGGAGGAACTGAAAGCTTTCACTGAAATGATG?GTTGCCTTGGATGATGAATTTGAGTGCGATACTTATGAAGTGCACCATCAAGGAAAT---------GACACAATCGATGCAGGAGGAAGTACTAAGAAAGATGCAAAACAAGAGCAAGGTAGCATTCAACCAAATCTCAACAAGGAAAAG---------------------------GAAAAGGACGTGAATGTTGGAACATCTGGAACTCACACTGTGCCACGAATTAAAGCTATTACGTCCAAAATGAGAATGCCCAAGAGTAAGGGTGCAACTGTACTAAATTTGGAACACTTACTCAAGTATGCTCCACAGCAAATTGACATCTCAAATACTCGAGCAACTCAATCACAGTTTGATACATGGTATGAAGCAGTACAACTTGCATACGACATAGGAGAAACTGAAATGCCAACTGTGATGAATGGGCTTATGGTTTGGTGCATTGAAAATGGAACCTCGCCAAATATCAATGGAGTTTGGGTTATGATGGATGGAGATGAACAAGTCGAATACCCACTGAAACCAATCGTTGAGAATGCAAAACCAACACTTAGGCAAATCATGGCACATTTCTCAGATGTTGCAGAAGCGTATATAGAAATGCGCAACAAAAAGGAACCATATATGCCACGATATGGTTTAGTTCGTAATCTGCGCGATGGAAGTTTGGCTCGCTATGCTTTTGACTTTTATGAAGTTACATCACGGACACCAGTGAGGGCTAGAGAGGCACACATTCAAATGAAGGCCGCAGCTTTAAAATCAGCTCAATCTCGACTTTTCGGATTGGATGGTGGCATTAGTACACAAGAGGAAAACACAGAGAGGCACACCACCGAGGATGTTTCTCCAAGTATGCATACTCTACTTGGAGTGAAGAACATGTGATTGTAGTGTCTTTCCGGACGATATATAGATATTTATG-TTTGCAGTAAGTATTTTGGCTTTTCCTGTACTACTTTTATCGTAATTAATAATC?GTTTGAATATTGCTGGCAGATAGGGGTGGTATAGCGATTCCGTCGTTGC-AGTGACCTTAGCTGTCGTTTCTGTATTATT-------------------------------------------------------------------------------------------------------------------------------------------------------------------------------------------------------------------------------------ATGTTT-GTATAAAAGTGCCGGGTTGTCGTTGTTGTGGCTGATCTATCGATTAGGTGATGTTGCGATTCTGTCGTAGCAGTGACTATGTCTGGATTTAGTTTACTTGGGTGATGCTGTGATTCTGTCATAGCAGTGGCTGTAAACTTCAATCAGGAGA?
	NTNHO90      AAATTAAAACAACTCAATACAACATAAGAAAATCAACGCAAAAACACTCACAAAAGCTTTCAATTCTAACTCAAGCAATTTGTTAAGTTTCAACTTTGATCTTCGTCGTACAAACCGTTTCAACTTCAGTGTAAGTTCTCGTAACTCAATAGTTTATTTCAAACTCTCTTAAATAGCAACATACCAGCCATGGCAACTTACATGTCAACGATTCAATTCGGTTCCATTGAATGCAAACTTCCATACTCACCCGCCCCTTTTGAGCTAGTTGCGAGGGAACGAGAAGTTTCAACC-------------------------------------------------------------------------------------------------------------------------------------------------------------------------------------------------------------------------------------------------------------------------------------------------------------------------------------------------------------------------------------------------------------------------------------------------------------------------------------------------------------------------------------------------------------------------------------------------------------------------------------------------------------------------------------------------------------------ATCACTGACCCCTTCGCAGGTTTGGAGATGCAGCTTAGTGCGCGACTACGAAGGCAAGAGCTTGCGACTGTCCGTACATCCAAGAGTGGTACCTGCATGTATCGATACAAGACTGATGTCCAGATTGCGCGCATCCAAAAGAAGCGCGAGGAAAGAGAAAGAGAAGAACACAACTTCCAAATGGCTGCACCAAGTGTTGTGTCAAAGATTACTATTGCTGGTGGAGAGCCACCTTCGAAACTTGAATCACAAGTGCAGAGGGGTGTCATCCACACAACTCCAAGAATGCGTACAGTGAAAACATATCACACGCCAAAGTTGACAGAGAAACAAATGAACCATCTTATCAAGCAGGTAAAGCAAATCATGTCAACTAAAGGAGGGTCTGTTCAACTGATTAGCAAGAAAAGTACCCATGTTCAATATAAAGAAGTTTTGGGAGCACATCGCGCAGTCGTTTGCACTGCA?CATATGAGAGGTTTACGAAAGAGAGTAGACTTTCAGTGTGATAAGTGGACTGTTATGTGTCTGAAGCATCTCGCAAGGACGGACAAGTGGACTAACCAAGTTCGTGCTACTGATCTACGAAAGGGCGATAGTGGAGTTATATTGAGTAATACTAATCTCAAAGGATACTTTGGGAGAAGTTCGGAGGGTCTATTTATAGTGCGTGGATCGCATGAAGGAAAAATCTATGATGCGCGTTCCAAGGTTACACAAGGAGTTCTAGACTCAATGGTTCAGTTCTCAAACGCTGAAAGCTTCTGGAAGGGATTGGACGGCAATTGGGCACAGATGAGATACCCTACAGATCATACATGCGTAGCAGGCTTACCAGTTGAAGACTGTGGCAGAGTAGCAGCAATAATGACACACAGTATTCTACCGTGCTATAAAATAACCTGCCCCACCTGTGCTCAACAGTATGCTAACTTGCCAGCCAGTGATTTGCTCAAAGTATTACACAGGCACGCAAGTGATGGTTTAAGTCGATTGGGAGCGGATAAAGATCGCTTTGTGCATGTCAGCAAGTTCTTGACAGTCCTAGAGCACTTGACTGAACCAGTTGATCTAAATCTAGAAATCTTCAATGAAGTATTCAAGTCTATAGGAGAGAAGCAACAATCACCTTTCAAAAACCTGAATATTCTGAATAATTTCTTTTTGAAAGGAAAGGAGAATACAGCTCGTGAATGGCAAGTGGCTCAATTAAGCTTACTTGAATTGGCAAGATTCCAAAAGAACAGGACGGATAATATCAAGAAAGGTGACATCTCGTTCTTCAGGAATAAGCTATCCGCCAAAGCAAATTGGAACTTGTATCTGTCATGCGATAATCAGTTGGATAAGAACGCAAACTTCCTGTGGGGACAGAGGGAATATCATGCCAAGCGGTTTTTCTCGAACTTTTTCGAGGAAATTGATCCAGCGAAGGGCTACTCAGCGTACGAAACTCGTTTGCATCCGAATGGGAGAAGAAAACTTGCAATTGGAAACCTAATTGTTCCACTCGATCTGGCTGAGTTTAGGCGGAAGATGAAAGGTGATTATAAAAGACAGCCAGGGGTGAGTAAGAAGTGCACGAGCTCGAAGGATGGAAACTACGTGTATCCCTGTTGTTGTACTACACTCGATGATGGCTCAGCTGTTGAATCAACATTTTACCCGCCAACTAAAAAGCATCTTGTAATAGGTAACAGCGGTGATCAAAAGTATGTTGATCTACCAAAAGGGAATTCTGAAATGTTATACATTGCCAGGCAAGGGTTTTGTTATATTAATATATTCCTTGCGATGTTGATTAACATTAGTGAGGAGGATGCAAAGGATTTCACGAAGAAGGTTCGTGACATGTGTGTGCCAAAGCTTGGAACCTGGCCAACCATGATGGATCTGGCTACTACTTGTGCTCAAATGAAAATATTCTACCCTGATGTTCATGATGCAGAGCTGCCCAGAATACTAGTTGACCATGAAACTCAGACATGCCATGTGGTCGACTCGTTTGGTTCGCAAACAACTGGTTATCATATTTTAAAGGCATCTAGCGTGTCTCAGCTTATCTTGTTTGCAAACGATGAGTTGGAATCTGACATTAAGCACTATAGAGTTGGTGGTATTCCTGGGGCATGTCCTGAGCTCGGATCCACGAT-ATCACCTTTCAGAGAAGGAGGAATCATAATGTCTGAGTCAGCAGCACTGAAACTGCTTTTAAAGGGTATCTTTAGACCCAAGGTGATGAGACAGTTACTATTAGATGAACCATATCTGCTCATTCTTTCGATATTGTCCCCTGGCATACTCATGGCTATGTACAATAATGGGATTTTTGAGCTTGCAGTGAAGTTGTGGATTAATGAAAAGCAATCTGTAGCCATGATAGCATCGTTATTGTCCGCCTTAGCTTTACGAGTGTCAGCAGCAGAAACACTCGTTGCACAGAGGATTATAATTGACACGGCAGCAACAGATCTTCTCGATGCTACGTGTGATGGCTTCAATTTAAATCTGACATATCCCACTGCACTCATGGTGTTGCAAGTTGTTAAGAACAGAAATGAATGTGATGATACGTTGTTTAAGGCAGGTTTTTCACATTACAACATGAGTGTCGTGCAGATTATGGAAAAAAATTATCTAAGCCTCTTGGGCGATGCATGGAAAGATTTAACCTGGCGAGAAAAATTATCAGCAACATGGCACTCATACAAAGCAAAGCGCTCTATCACTCAGTTCATAAAACCCATAGGCAAAGCAGATTTAAAAGGGTTGTACAACATATCACCGCAAGCATTCTTGGGTCAGGGCGTACAGATAGTCAAAGGCACCGCCTCAGGGTTGAATGAGCGACTCAATAATTATATCAATACTAAGTGTGTAAATATTTCATCCTTTTTCATTCGTAGAATTTTCCGGCGCTTGCCAACTTTTGTAACTTTCATTAATTCATTATTAGTCATTAGTATGCTAACTAGTGTAGTAGCAGTGTGTCAAGCAATAATTCTAGATCAAAGGAAGTATAGAAAGGAAATTGAGTTGATGCAGATTGAGAAGAATGAAATTGTTTGTATGGAGTTGTATGCGAGTCTGCAGCGCAAACTTGAGCGTGAATTCACATGGGATGAATATATGGAATATTTGAAATCTGTGAATCCCCAGATAGTTCAATTCGCGCAAGCTCAAATGGAAGAATATAATGTGCGGCATCAGCGCTCCACACCAGGTGTTAAGAATTTAGAGCAGGTGGTAGCATTTATAACTCTAATTATCATGATGTTTGATGCTGAAAGGAGCGACTGTGTATTTAAGACTCTCAACAAATTCAAGGGCATCGTTTCTTCAATGGATCATGAAGTTAGACACCAGTCCTTGGATGATGTAATCAAGAATTTCGATGAAAGGAACGAAGTTATTGATTTTGAGCTAAATGAGGATACAATTAAAACATCATCAGTGTTGGACACAAAGTTTGGCGACTGGTGGGATCGGCAAATCCAAATGGGACACACACTTCCCCACTATAGAACTGAGGGACACTTCATGGAATTCACAAGGGCAACTGCTGTGCAAGTGGCCAATGACATCGCGCATAGTGAGCACCTAGATTTTCTAGTGAGGGGAGCTGTTGGGTCTGGAAAATCTACTGGACTGCCTGTTCATCTCAGTGCAGCTGGATCCGTGCTTTTGATAGAACCAACTCGACCACTTGCAGAAAACGTGTTCAAGCAGTTATCCAGTGAACCGTTTTTCAAGAAGCCAACACTGCGCATGCGAGGAAATAGTGTGTTTGGTTCCTCTCCAATTTCCATCATGACTAGCGGCTTTGCGTTGCACTACTATGCTAATAATCGCTCTCAGCTAACTCAGTTTAATTTCATAATTTTTGATGAATGTCATGTTCTAGATCCTTCTGCAATGGCATTTCGTAGCTTGTTAAGTGTGTATCACCAAACATGCAAAGTGTTAAAGGTATCAGCCACTCCAGTGGGAAGGGAGGTCGAGTTCACAACACAACAACCAGTTAAATTGGTGGTTGAGGATACACTTTCATTCCAATCTTTTGTTGATGCGCAAGGCTCAAAAACCAATGCCGACGTTATTCAGCATGGTTCGAACATACTCGTGTATGTGTCGAGTTACAATGAAGTGGATGCATTAGCCAAGCTTCTAACGGATAGGAATATGGTTGTCTCAAAAGTTGATGGCAGAACAATGAAGCACGGATGCTTAGAAATTGTAACGAAAGGGACTAGTGCAAAGCCACATTTTGTCGTAGCAACCAACATTATTGAAAATGGAGTAACTTTAGATATAGATGTAGTTGTAGATTTTGGGCTTAAAGTCTCACCGTTTTTAGATATTGACAATAGGAGCATTGCATACAATAAGATTAGTGTTAGCTATGGAGAAAGAATTCAGAGGTTAGGTCGTGTTGGGCGCTTTAAGAAGGGAGTGGCATTGCGTATTGGGCACACCGAAAAGGGAATTATTGAGATTCCAAGTATGATTGCTAGTGAAGCTGCGCTTGCGTGCTTTGCATACAATTTGCCAGTAATGACAGGGGGTGTTTCAACTAGCCTCATTGGCAATTGTACTGTTCGTCAAGTTAAAACTATGCAACAATTTGAGCTGAGTCCATTCTTTATACAAAATTTTGTTGCCCATGATGGATCAATGCATCCTGTCATACATGACATTCTTAAGAAGTATAAACTGCGAGATTGTATGACGCCCTTGTGTGATCAATCCATACCTTACAGAGCCTCAAGCACTTGGTTGTCTGTTGGTGAGTACGAACGACTCGGAGTGGTTTTGGACATTCCAAAACAAATCAAGATTGCATTCCACATCAAGGACATCCCTCCTAAGTTGCATGAAATGCTTTGGGAAACAGTTATTAAATATAAGGATGTGTGTTTGTTTCCAAGTATT-CGGGCTTCATCCATTAGCAAAATTGCATACACACTGCGCACTGATCTTTTTGCAATCCCCAGAACCCTAATTCTAGTTGAAAGATTGCTCGAGGAGGAACGAGTGAAACAGAGCCAATTTAGAAGTCTCATTGATGAAGGATGCTCAAGTATGTTTTCAATTGTTAATTTAACAAACACTCTTAGAGCTAGATATGCAAAGGATTACACTGCAGAAAACATACAGAAGCTCGAGAAAGTGAGGAGTCAGTTAAAGGAGTTCTCAAATTTAAATGGCTCTGCATGCGAGGAGAACTTAATGAAGAGGTATGAATCTCTACAGTTTGTGCATCATCAAGCAACAACTTCACTCGCAAAGGATTTGAAGTTGAAAGGAGTTTGGAAGAAGTCACTAGTTGTGCAGGACCTACTCATAGCGGGTGCCGTTGCTATCGGTGGAATAGGGCTTATCTATAGTTGGTTTACTCAATCAGTTGAAACTGTGTCTCACCAGGGCAAGAACAAATCCAAAAGAATTCAAGCATTGAAGTTTCGACATGCCCGCGATAAGAGGGCTGGCTTTGAAATTGATAACAATGATGATACAATAGAAGAATTCTTTGGATCTGCATACAGGAAGAAGGGAAAAGGTAAAGGCACCACTGTTGGTATGGGCAAATCAAGCAGGAGGTTTGTTAATATGTATGGATTCGACCCAACAGAATATTCATTCATCCAGTTCGTTGATCCGCTCACTGGAGCTCAAATTGAAGAGAACGTCTATGCTGATATTAGAGACATCCAAGAGCGCTTTAGTGATGTCCGCAGGAAAATGGTAGAGGATGATGAAATCGAATTGCAAGCATTGAGCAGCAACACAAACATTCATGCTTACTTCAGGAAAGATTGGTCTGACAAGGCTCTAAAAATTGATTTGATGCCACACAACCCACTCAAAATCTGCGATAAATCGAATGGCATTGCTAAGTTTCCTGAAAGAGAATTTGAGTTGAGGCAAACTGGGCCAGCAATAGAGGTTGATGTGAAAGACATCCCAAAACAGGAAGTGGAGCATGAAGCCAAATCACTCATGAGAGGTTTAAGGGATTTCAATCCAATTGCTCAAACAGTTTGCAGAGTAAAAGTGTCTGTTGAATATGGAACTTCTGAAATGTATGGGTTCGGTTTTGGTGCGTATATTATAGTAAACCACCATCTATTCAAGAGTTTCAATGGATCCATGGAAGTGCGATCAATGCATGGAACATTCATAGTGAAGAATTTGCATAGCTTGAGTGTTTTACCGATCAAAGGCAGAGACATTATCATCATAAAGATGCCAAAGGACTTCCCTGTTTTCCCACAAAAACTGCACTTCCGAGCTCCAATACAAAATGAGAGGATTTGTTTGGTTGGAACTAACTTTCAAGAAAAACATGCATCGTCAATCATCACAGAAACGAGTACTACATACAATGTGCCGGGCAGCACTTTTTGGAAGCATTGGATTGAAACAAATGATGGGCATTGTGGATTACCAGTAGTGAGTACAGCTGATGGATGTCTGGTTGGAATACACAGCTTGGCGAATAATGTGCAAACCACGAATTATTATTCAGCTTTTGATGAGGATTTTGAAAGCAAGTATCTCCGAACTAATGAACACAATGAGTGGACCAAATCGTGGGTATATAACCCAGATACTGTGTTGTGGGGTCCATTGAAGCTCAAGGAGAGTACCCCTAAAGGCTTGTTTAAGACAACAAAACTCGTACAGGATTTAAT------TGATCATGATGTTGTTGTAGAGCAAGCTAAACATTCTGCGTGGATGTATGAGGCTCTAACAGGGAATTTGCAAGCTGTGGCGACAATGAAGAGTCAGCTAGTGACAAAGCACGTGGTCAAAGGGGAGTGTCGGCACTTCAAAGAGTTCTTAACTGTGGATTCGGAAGCAGAAGCT------TTCTTCAGGCCTTTGATGGATGCTTATGGGAAGAGCTTATTAAATAGAGAAGCATATATAAAGGACATAATGAAATACTCAAAGCCTATTGATGTTGGAATAGTAGACTGCGAT--GCTTTTGAAGAGGCTATCAATAGAGTTATCATTTATCTGCAA-ATGCATGGTTTCCAGAAATGCAATTACATCACCGATGAGCAGGAAATTTTCAAAGCTCTCAATATGAAAGCTGCTGTCGGAGCTATGTATGGAGGCAAGAAGAAAGACTACTTTGAGCATTTTACTGAGGCGGATAAAGAGGAAATTGTTATGCAAAGTTGCTTGCGATTGTACAAGGGCTCGCTTGGCATATGGAATGGATCATTGAAAGCAGAACTTCGGTGCAAAGAGAAGATACTTGCAAATAAGACAAGGACATTCACTGCTGCACCTTTAGATACTCTACTGGGTGGAAAGGTGTGCGTTGATGATTTTAATAATCAATTCTACTCAAAGAACATTGAATGCTGCTGGACTGTTGGAATGACTAAGTTTTATGGAGGTTGGGACAAATTGCTTCGGCGTCTACCTGAAAATT---GGGTGTACTGCGATGCTGATGGTTCACAATTCGATAGTTCACTCACCCCATACCTAATTAATGCTGTTCTCATCATCAGAAGCACATACATGGAAGATTGGGAATTGGGGTTGCAAATGTTGCGCAATTTGTACACAGAAATAATTTACACACCAATCTCAACTCCAGATGGAACAATTGTCAAGAAGTTTAGAGGTAATAATAGCGGTCAACCCTCTACCGTTGTGGATAATTCTCTCATGGTTGTCCTTGCTATGCATTACGCTCTCATTAAGGAGGGCGTTGAGTTTGAAGAAATCGACAGCACGTGTGTATTCTTTGTTAATGGTGATGACTTATTGATTGCTGTGAATCCGGAGAAAGAGAGCATTCTCGATAGAATGTCACAACATTTCTCAGATCTTGGTTTGAACTATGATTTTTCATCGAGAACAAGAAGGAAGGAGGAATTGTGGTTCATGTCCCACAGAGGCCTGTTAATCGAGGGCATGTACGTGCCAAAGCTTGAAGAAGAGAGAATTGTATCCATTCTGCAATGGGATAGAGCTGATCTGCCAGAGCACAGATTAGAAGCGATTTGTGCAGCAATGATAGAATCCTGGGGTTATTTTAAGTTAACGCACCAAATCAGGAGATTCTACTCATGGTTGTTGCAACAGCAACCTTTTTCAACGATAGCGCAGGAAGGAAAAGCTCCATACATAGCGAGCATGGCATTGAAGAAGCTGTACATGGATAGGACAGTAGATGAGGAGGAACTGAAAGCTTTCACTGAAATGATG?GTTGCCTTGGATGATGAATTTGAGTGCGATACTTATGAAGTGCACCATCAAGGAAAT---------GACACAATCGATGCAGGAGGAAGTACTAAGAAAGATGCAAAACAAGAGCAAGGTAGCATTCAACCAAATCTCAACAAGGAAAAG---------------------------GAAAAGGACGTGAATGTTGGAACATCTGGAACTCACACTGTGCCACGAATTAAAGCTATCACGTCCAAAATGAGAATGCCCAAGAGTAAGGGTGCAACTGTACTAAATTTGGAACACTTACTCGAGTATGCTCCACAGCAAATTGACATCTCAAATACTCGAGCAACTCAATCACAGTTTGATACATGGTATGAAGCAGTACAACTTGCATACGACATAGGAGAAACTGAAATGCCAACTGTGATGAATGGGCTTATGGTTTGGTGCATTGAAAATGGAACCTCGCCAAATATCAATGGAGTTTGGGTTATGATGGATGGAGATGAACAAGTCGAATACCCACTGAAACCAATCGTTGAGAATGCAAAACCAACACTTAGGCAAATCATGGCACATTTCTCAGATGTTGCAGAAGCGTATATAGAAATGCGCAACAAAAAGGAACCATATATGCCACGATATGGTTTAGTTCGTAATCTGCGCGATGGAAGTTTGGCTCGCTATGCTTTTGACTTTTATGAAGTTACATCACGAACACCAGTGAGGGCTAGAGAGGCACACATTCAAATGAAGGCCGCAGCTTTAAAATCAGCTCAATCTCGACTTTTCGGATTGGATGGTGGCATTAGTACACAAGAGGAAAACACAGAGAGGCACACCACCGAGGATGTTTCTCCAAGTATGCATACTCTACTTGGAGTGAAGAACATGTGATTGTAGTGTCTTTCCGGACGATATATAGATATTTATG-TTTGCAGTAAGTATTTTGGCTTTTCCTGTACTACTTTTATCGTAATTAATAATC?GTTTGAATATTACTGGCAGATAGGGGTGGTATAGCGATTCCGTCGTTGC-AGTGACCTTAGCTGTCGTTTCTGTATTATT-------------------------------------------------------------------------------------------------------------------------------------------------------------------------------------------------------------------------------------ATGTTT-GTATAAAAGTGCCGGGTTGTCGTTGTTGTGGCTGATCTATCGATTAGGTGATGTTGCGATTCTGTCGTAGCAGTGACTATGTCTGGATTTAGTTTACTTGGGTGATGCTGTGATTCTGTCATAGCAGTGGCTGTAAACTTCAATCAGGAGA?
	Nicola       AAATTAAAACAACTCAATACAACATAAGAAAAACAACGCAAAAACACTCACAAAAGCTTTCAATTCTAACTCAAGCAATTTGTTAAGTTTCAACTTTGATCTTCGTCGTACAAACCGTTTCAATTTCAGTGTAAGTTCTCGTAACTCAATAGTTTATTTCAAACTCTCTCAAATAGCAACATACCAGCCATGGCAACTTACATGTCAACGATTCAATTCGGTTCCATTGAATGCAAACTTCCATACTCACCCGCCCCTTTTGAGCTAGTTGCGAGGGAACGAGAAGTTTCAACC-------------------------------------------------------------------------------------------------------------------------------------------------------------------------------------------------------------------------------------------------------------------------------------------------------------------------------------------------------------------------------------------------------------------------------------------------------------------------------------------------------------------------------------------------------------------------------------------------------------------------------------------------------------------------------------------------------------------ATCACTGACCCCTTCGCAGGTTTGGAGATGCAGCTTAGTGCGCGACTACGAAGGCAAGAACTTGCGACTGTCCGTACATCCAAGAGTGGTACCTGCATGTATCGATACAAGACTGATGTCCAGATTGCGCGCATCCAAAAGAAGCGCGAGGAAAGAGAAAGAGAAGAACACAACTTCCAAATGGCTGCACCGAGTGTTGTGTCGAAGATTACTATTGCTGGTGGAGAGCCACCTTCGAAACTTGAATCACAAGTGCAGAGAGGTGTCATCCACACAACTCCAAGAATGCGTACAGTGAAAACATATCACACGCCAAAGTTGACAGAGAAACAAATGAACCACCTTATCAAGCAGGTAAAGCAAATCATGTCAACTAAAGGAGGGTCTGTCCAACTGATTAGCAAGAAAAGTACCCATGTTCAATATAAAGAAGTTTTGGGATCACATCGCGCAGTTGTTTGCACTGCA?CATATGAGAGGTTTACGAAAGAGAGTAGACTTTCAGTGTGATAAGTGGACTGTTATGTGTCTGAAGCATCTCGCCAGGACGGACAAGTGGACTAACCGAGTTCGTGCTACTGATCTACGAAAGGGCGATAGTGGAGTTATATTGAGTAATACTAATCTCAAAGGATACTTTGGGAGAAGTTCCGGGGGTCTATTTATAGTGCGTGGATCGCATGAAGGAAAAATCTATGATGCGCGTTCCAAGGTTACACAAGGAGTTCTAGACTCAATGGTTCAGTTCTCAAGCGCTGAAAGCTTCTGGAAGGGATTGGACGGCAATTGGGCACGGATGAGATACCCTGCAGATCATACATGCGTAGCAGGCTTACCAGTTGAAGACTGTGGCAGAGTAGCAGCAATAATGACACACAGTATTCTGCCGTGCTATAAGATAACCTGCCCCACCTGTGCTCAACAGTATGCCAACTTGCCAGCCAGTGATTTGCTCAAAGTATTACACAGGCACGCAAGTGATGGTTTAAGTCGATTGGGAGCGGATAAAGATCGCTTTGTGCATGTCAGCAAGTTCTTGACAGTCCTAGAGCACTTGACTGAACCAGTTGATCTAAATCTAGAAATCTTCAATGAAGTATTCAAGTCTATAGGAGAGAAGCAACAATCACCTTTCAAAAACCTGAATATTCTGAATAATTTCTTTTTGAAAGGAAAAGAAAATACAGCTCGTGAATGGCAAGTGGCTCAATTAAGCTTACTTGAATTGGCAAGATTCCAAAAGAACAGGACAGATAATATCAAGAAAGGTGACATCTCGTTCTTCAGGAATAAGCTATCCGCCAAAGCAAATTGGAACTTGTATCTGTCATGCGATAATCAGTTGGATAAGAATGCAAACTTCCTGTGGGGACAGAGGGAATATCATGCCAAGCGGTTTTTCTCGAACTTTTTCGAGGAAATTGATCCAGCGAAGGGCTACTCAGCGTACGAAACTCGTTTGCATCCGAATGGGAGAAGAAAACTTGCAATTGGAAACCTAATTGTTCCACTCGATCTGGCTGAGTTTAGGCGGAAGATGAAAGGTGATTATAAAAGACAGCCAGGGGTGAGTAAGAAGTGCACGAGCTCGAAGGATGGAAACTACGTGTATCCCTGTTGTTGTACTACACTCGATGATGGCTCAGCTGTTGAATCAACATTTTACCCGCCAACTAAGAAGCATCTTGTAATAGGTAACAGCGGTGATCAAAAGTATGTTGATCTACCAAAAGGGAATTCTGAAATGTTATACATTGCCAGGCAAGGGTTTTGTTATATTAATATATTCCTTGCGATGTTGATTAACATTAGTGAGGAAGATGCAAAGGATTTCACTAAGAAGGTTCGTGACATGTGTGTGCCAAAGCTTGGAACCTGGCCAACCATGATGGATCTGGCTACTACTTGTGCTCAAATGAAAATATTCTACCCTGATGTTCATGATGCAGAGCTGCCCAGAATACTAGTTGACCATGAAACTCAGACATGCCATGTGGTCGACTCGTTTGGTTCGCAAACAACTGGTTATCATATTTTAAAGGCATCTAGCGTGTCTCAGCTTATCTTGTTTGCAAACGATGAGTTGGAATCTGACATTAAGCACTATAGAGTTGGTGGTATTCCTGGGGCATGTCCTGAGCTCGGATCCACGAT-ATCACCTTTCAGAGAAGGAGGAATCATAATGTCTGAGTCAGCAGCACTGAAACTGCTTTTAAAGGGTATCTTTAGACCCAAGGTGATGAGACAGTTACTATTAGATGAACCATATCTGCTCATTCTTTCGATATTGTCCCCTGGCATACTCATGGCTATGTACAATAATGGGATTTTTGAGCTTGCAGTGAAGTTGTGGATAAATGAAAAGCAATCTATAGCCATGATAGCATCGTTATTGTCCGCCTTAGCTTTACGAGTGTCAGCAGCAGAAACACTCGTTGCACAGAGGATCATAATTGACACGGCAGCAACAGATCTTCTCGATGCTACGTGTGATGGATTCAATTTAAATCTGACATGTCCCACTGCACTCATGGTGTTGCAAGTTGTTAAGAACAGAAATGAATGTGATGATACGTTGTTTAAGGCAGGTTTTTCGCATTACAACACGAGTGTCGTGCAGATTATGGAAAAAAATTATCTAAGCCTCTTGGGCGATGCATGGAAAGATTTAACCTGGCGAGAAAAATTATCCGCAACATGGTACTCATACAAAGCAAAGCGCTCTATCACTCAGTTCATAAAACCCATAGGCAAAGCAGATTTAAAAGGGTTGTACAACATATCACCGCAAGCATTCTTGGGTCAGGGCGTACAGAGAGTCAAAGGCACCGCCTCAGGGTTGAATGAGCGACTCAATAATTATATTAATACTAAGTGTGTAAATATTTCATCCTTTTTCATTCGTAGAATTTTCCGGCGCTTGCCAACTTTTGTAACTTTCATTAATTCATTATTAGTCATTAGTATGCTAACTAGTGTAGTAGCAGTGTGTCAAGCAATAATTCTAGATCAAAGGAAGTATAGAAAGGAAATTGAGCTGATGCAGATTGAGAAGAATGAAATTGTTTGTATGGAGTTGTATGCGAGTCTGCAGCGCAAACTTGAGCGTGAATTCACATGGGATGAATATATGGAATATTTGAAATCTGTGAATCCCCAGATAGTTCAATTCGCGCAAGCTCAAATGGAAGAATATAATGTGCGGCATCAGCGCTCCACACCAGGTGTTAAGAATTTAGAGCAGGTGGTAGCATTTATAACTCTAATTATCATGATGTTTGATGCTGAAAGGAGCGACTGTGTATTTAAGACTCTCAACAAATTCAAGGGCATCGTTTCTTCAATGGATCATGAAGTTAAACACCAGTCCTTGGATGATGTAATCAAGAATTTCGATGAAAGGAACGAAGTTATTGATTTTGAGCTAAATGAGGATACAATTAAAACATCATCAGTGTTGGACACGAAGTTTAGCGACTGGTGGGATCGGCAAATCCAAATGGGACACACACTTCCCCATTATAGAACTGAGGGACACTTCATGGAATTCACAAGGGCAACTGCTGTACAAGTAGCCAACGACATCGCGCATAGTGAGCACCTAGACTTTCTAGTGAGGGGAGCTGTTGGGTCTGGAAAATCCACTGGACTGCCTGTCCATCTCAGTGCAGCTGGATCCGTGCTTTTGATAGAACCAACTCGACCACTTGCAGAAAACGTGTTCAAGCAATTATCCAGTGAACCGTTTTTCAAGAAACCAACACTGCGCATGCGAGGAAATAGTGTGTTTGGTTCCTCTCCAATCTCCATCATGACTAGCGGCTTTGCGTTGCACTACTATGCTAATAATCGCTCTCAGCTAACTCAGTTTAATTTCATAATTTTTGATGAATGTCATGTTTTAGATCCTTCTGCAATGGCATTCCGTAGCTTGTTAAGTGTGTATCACCAAACATGCAAAGTGTTAAAGGTGTCAGCCACTCCAGTGGGAAGGGAGGTCGAGTTCACAACACAACAACCAGTTAAATTGGTGGTTGAGGATACACTTTCATTCCAATCTTTTGTTGATGCGCAAGGCTCAAAAACCAATGCCGACGTTGTTCAGCATGGTTCGAACATACTCGTGTATGTGTCGAGTTACAATGAAGTGGATACATTAGCCAAGCTTCTAACAGATAGGAATATGGTAGTCTCAAAAGTTGATGGCAGAACAATGAAGCACGGATGCTTAGAAATTGTAACGAAAGGGACTAGTGCAAAGCCACATTTTGTCGTAGCAACCAACATTATTGAAAATGGAGTAACTTTAGATATAGATGTAGTTGTAGATTTTGGGCTTAAAGTCTCACCGTTTTTAGATATTGATAATAGGAGCATTGCATACAATAAGATTAGTGTTAGCTATGGAGAAAGAATTCAGAGGTTGGGCCGTGTTGGGCGCTTTAAGAAGGGAGTGGCATTGCGTATTGGACACACCGAAAAGGGAATTATTGAGATTCCAAGTATGATTGCTAGTGAAGCTGCGCTCGCGTGCTTTGCATACAATTTGCCAGTAATGACAGGGGGTGTTTCAACTAGCCTCATTGGCAATTGTACTGTTCGTCAAGTTAAAACTATGCAACAATTTGAGCTGAGTCCATTCTTTATACAAAATTTTGTTGCCCATGATGGATCAATGCATCCTGTCATACATGACATTCTTAAGAAGTATAAACTGCGAGATTGTATGACGCCCTTGTGTGATCAATCCATACCTTACAGAGCCTCAAGCACTTGGTTGTCTGTTAGTGAGTACGAACGACTCGGAGTGGTTTTGGACATTCCAAAACAGATCAAGATTGCATTCCACATCAAGGACATCCCTCCTAAGTTGCATGAAATGCTTTGGGAAACAGTTATCAAATATAAGGATGTTTGTTTGTTCCCAAGTATT-CGGGCTTCATCCATTAGCAAAATTGCATACACACTGCGCACTGATCTTTTTGCAATTCCCAGAACCCTAATTCTAGTTGAAAGATTGATCGAGGAGGAACGAGTGAAACAGAGTCAATTCAGAAGTCTCATTGATGAAGGATGCTCAAGCATGTTTTCAATTGTTAATTTAACAAACACTCTTAGAGCTAGATATGCAAAGGATTACACTGCAGAAAACATACAGAAGCTCGAGAAAGTGAGGAGTCAGTTGAAGGAGTTCTCAAATTTAAATGGCTCTGCATGCGAGGAGAACTTAATGAAGAGGTATGAATCTCTACAGTTTGTGCATCATCAAGCAACAACTTCACTCGCAAAGGATTTGAAGTTGAAAGGAGTTTGGAAGAAGTCATTAGTTGTGCAGGACTTAATCATAGCGGGTGCCGTTGCTATTGGTGGAATAGGGCTCATCTATAGTTGGTTTACTCAATCAGTTGAAACTGTGTCTCACCAGGGCAAGAACAAATCCAAAAGAATTCAAGCATTGAAGTTTCGACACGCCCGCGATAAGAGGGCTGGCTTTGAAATTGATAACAATGATGATACAATAGAAGAATTCTTTGGATCTGCATACAGGAAGAAGGGAAAAGGTAAAGGCACCACTGTTGGTATGGGCAAGTCAAGCAGGAGGTTTGTTAATATGTATGGATTTGACCCAACAGAATATTCATTCATCCAGTTCGTTGATCCGCTCACTGGAGCTCAAATTGAAGAGAACGTCTATGCTGATATTAGAGACATCCAAGAGCGCTTTAGTGATGTCCGCAAGAAAATGGTAGAGGATGATGAAATCGAATTGCAAGCATTGGGCAGCAACACAACCATTCATGCTTACTTCAGGAAAGATTGGTCTGACAAAGCTCTAAAAATTGATTTGATGCCACACAACCCACTCAAAATCTGTGATAAATCGAATGGCATTGCTAAGTTTCCTGAAAGAGAACTTGAGTTGAGGCAAACTGGGCCAGCAATAGAGGTTGATGTGAAAGACATTCCAAAACAGGAAGTGGAGCATGAAGCCAAATCACTCATGAGAGGTTTAAGGGACTTCAATCCAATTGCTCAAACAGTTTGCAGAGTAAAAGTGTCTGTTGAATATGGAACGTCTGAAATGTATGGGTTCGGTTTTGGTGCGTATATTATAGTAAACCACCATCTATTCAAGAGTTTCAATGGATCCATGGAAGTGCGATCAATGCATGGAACATTCAGAGTGAAGAATTTGCATAGCTTGAGCGTTTTACCGATCAAAGGCAGAGACATTATCATCATAAAGATGCCAAAGGATTTCCCTGTTTTCCCACAAAAACTGCACTTCCGAGCTCCAGTGCAGAATGAGAGGATTTGTTTGGTTGGAACTAATTTTCAAGAAAAACATGCATCATCAATCATCACAGAAACGAGTACTACATACAATGTACCGGGCAGCACTTTTTGGAAGCATTGGATTGAAACAAATGATGGGCATTGTGGATTACCAGTAGTGAGTACAGCTGATGGACGTCTAGTTGGAATACACAGCTTGGCGAATAATGTGCAAACCACGAATTATTATTCAGCCTTTGATGAGGATTTTGAAAGTAAGTATCTCCGAACTGATGAGCATAATGAGTGGACCAAATCGTGGGTATATAACCCAGATACTGTGTTGTGGGGTCCATTGAAGCTCAAGGAGAGTACCCCTAAAGGCCTGTTTAAGACAACAAAACTTGTACAGGATTTAAT------TGAGCATGATGTTGTTGTAGAGCAAGCTAAACATTCTGCGTGGATGTATGAGGCTCTAACAGGGAATTTGCAAGCTGTGGCGACAATGAAGAGTCAGCTAGTGACAAAGCACGTGGTCAAAGGGGAGTGTCGGCACTTCAAAGAGTTCTTAACTGTGGATTCGGAAGCAGAAGCT------TTCTTCAGGCCTTTGATGGATGCTTATGGGAAGAGCTTGTTAAATAGAGAAGCATATATAAAGGACATAATGAAATACTCAAAGCCTATTGATGTTGGAATAGTAGACTGTGAT--GCTTTTGAAGAGGCTATCAATAGGGTTATCATTTATCTGCAA-GTGCATGGCTTCCAGAAATGCAATTACATCACCGATGAGCAGGAAATTTTCAAAGCTCTCAATATGAAAGCTGCTGTCGGAGCTATGTATGGAGGCAAGAAGAAAGACTACTTCGAGCATTTTACTGAGGCGGATAAAGAGGAAATTGTTATGCAAAGTTGCTTTCGATTGTACAAGGGCTCGCTTGGCATATGGAATGGATCATTGAAAGCAGAACTTCGGTGCAAAGAGAAGATACTTGCAAATAAGACAAGGACATTCACTGCTGCACCTTTAGATACTCTACTGGGTGGAAAGGTGTGCGTTGATGATTTTAATAATCAATTCTACTCAAAGAACATTGAATGCTGCTGGACTGTTGGAATGACTAAGTTTTATGGAGGTTGGGACAAATTGCTTCGGCGTCTACCTGAAAATT---GGGTGTACTGCGATGCCGATGGTTCACAATTCGATAGTTCACTCACCCCATACCTAATTAATGCTGTTCTCATCATCAGAAGCACATACATGGAAGATTGGGACTTGGGGTTGCAAATGTTGCGCAATTTGTACACAGAAATAATTTACACACCAATCTCAACTCCAGATGGAACAATTGTCAAGAAGTTTAGAGGTAATAATAGCGGTCAACCTTCTACCGTTGTGGATAATTCTCTCATGGTTGTCCTTGCTATGCATTACGCTCTCATTAAGGAGTGCGTTGAGTTTGAAGAAATCGACAGCACGTGTGTATTCTTTGTTAATGGTGATGACTTATTGATTGCTGTGAATCCGGAGAAAGAGAGCATTCTCGATAGAATGTCACAACATTTCTCAGATCTTGGTTTGAACTATGATTTTTCGTCGAGAACAAGAAGGAAGGAGGAATTGTGGTTCATGTCCCATAGAGGCCTGCTAATCGAGGGTATGTACGTGCCAAAGCTTGAAGAAGAGAGAATTGTATCCATTCTGCAATGGGATAGAGCTGATCTGCCAGAGCACAGATTAGAAGCGATTTGTGCAGCAATGATAGAATCCTGGGGTTATTTTGAGTTAACGCACCAAATCAGGAGATTCTACTCATGGTTGTTGCAACAGCAACCTTTTTCAACGATAGCACAGGAAGGAAAAGCTCCATACATAGCGAGCATGGCATTGAAGAAGCTGTACATGAATAGGACAGTAGATGAGGAGGAACTGAAGGCTTTCACTGAAATGATG?GTTGCCTTGGATGATGAATTTGAGTGCGATACCTATGAAGTGCACCATCAAGGAAAT---------GACACAATCGATGCAGGAGGAAGCACAAAGAAGGATGCAAAACAAGAGCAAGGTAGCATTCAACTAAATCTCAACAAGGAAAAG---------------------------GAAAAGGACGTGAATGTTGGAACATCTGGAACTCATACTGTGCCACGAATTAAAGCTATCACGTCCAAAATGAGAATGCCCAAGAGTAAAGGTGCAACTGTACTAAATTTGGAACACTTACTCGAGTATGCTCCACAGCAAATTGACATCTCAAATACTCGAGCAACTCAATCACAGTTTGATACGTGGTATGAAGCAGTACAACTTGCATACGACATAGGAGAAACTGAAATGCCAACTGTGATGAATGGGCTTATGGTTTGGTGCATTGAAAATGGAACCTCGCCAAACATCAACGGAGTTTGGGTTATGATGGATGGAGATGAACAAGTCGAATACCCACTGAAACCAATCGTTGAGAATGCAAAACCAACACTTAGGCAAATCATGGCACATTTCTCAGATGTTGCAGAAGCGTATATAGAAATGCGCAACAAAAAGGAACCATATATGCCACGATATGGGTTAGTTCGAACTGTGCGCGATGGAAGTTTGGCCCGCTATGCTTTTGACTTTTATGAAGTTACATCACGGACACCAGTGAGGGCTAGAGAGGCACACATTCAAATGAAGGCCGCAGCTTTACAATCAGCTCAATCTCGACTTTTCGGATTGGATGGTGGCATTAGTACACAAGAGGAAAACACAGAGAGGCACACCACCGAGGATGTTTCTCCAAGTATGCATACTCTACTTGGAGTGAAGAACATGTGATTGTAGTGTCTTTCCGGACGATATATAGATATTTATG-TTTGCAGTAAGTATTTTGGCTTTTCCTGTACTACTTTTATCGAAATTAATAATC?GTTTGAATATTACTGGCAGATAGGGGTGGTATAGCGATTCCGTCGTTGT-AGTGACCTTAGCTGTCGTTTCTGTATTATT-------------------------------------------------------------------------------------------------------------------------------------------------------------------------------------------------------------------------------------ATGTTT-GTATAAAAGTGCCGGGTTGTTGTTGTTGTGGCTGATCTATCGATTAGGTGATGTTGCGATTTTGTCGTAGCAGTGACTATGTCTGGATTTAGTTTACTTGGGTGATGCTGTGATTCTGTCATAGCAGTGAGTGTAAACTCCAATCAGGAGA?
	L26          ?AATTAAAACAACTCAATACAACATAAGAAAATCAACGCAAAAACACTCACAAAAGCTTTCAATTCTAATTCAAACAATTTGATAAGTTCCAATTTCGATTTTCATCAAACAAACTCTTTCAATTTCAGTGTAAGCTATCGTAATTCAGTAAGTTATTTCAAACTCTCGTAAATTGCAGAAGATCATCCATGGCAACTTACACATCAACAATCCAGTTTGGTTCCATTGAATGCAAACTTCCATACTCACCCGCTCCTTTTGGGCTAGTTGCGGGGAAACGAGAAGTTTCAACC-------------------------------------------------------------------------------------------------------------------------------------------------------------------------------------------------------------------------------------------------------------------------------------------------------------------------------------------------------------------------------------------------------------------------------------------------------------------------------------------------------------------------------------------------------------------------------------------------------------------------------------------------------------------------------------------------------------------ACCACTGACCCCTTCGCAAGTTTGGAGATGCAGCTTAGTGCGCGATTACGAAGGCAAGAGTTTGCAACTATTCGAACATCCAAGAATGGTACTTGCATGTATCGATACAAGACTGATGTCCAGATTGCGCGCATTCAAAAGAAGCGCGAGGAGAGAGAAAGAGAGGAATATAATTTCCAAATGGCTGCGTCAAGTGTTGTGTCGAAGATCACTATTGCTGGTGGAGAGCCACCTTCAAAACTTGAATCACAAGTGCGGAGGGGTGTCATCCACACAACTCCAAGGATGCGCACAGCAAAAACATATCACACGCCAAAGTTGACAGAGGGACAAATGAACCACCTTATCAAGCAGGTGAAGCAAATTATGTCAACCAAAGGAGGGTCTGTTCAACTGATTAGCAAGAAAAGTACCCATGTTCACTATAAAGAAGTTTTGGGATCACATCGCGCAGTTGTTTGCACTGCA?CACATGAGAGGTTTACGAAAGAGAGTGGACTTTCGGTGTGACAAATGGACCGTTGTGCGTCTACAGCATCTCGCCAGGACGGACAAGTGGACTAACCAAGTTCGTGCTACTGATCTACGCAAGGGCGATAGTGGAGTTATATTGAGTAATACTAATCTCAAAGGAAACTTTGGAAGAAGCTCGGAGGGCCTATTCATAGTGCGTGGGTCGCACGAAGGAAAAATCTATGATGCACGTTCCAAGGTTACTCAAGGGGTTATGGATTCAATGGTTCAGTTCTCAAGCGCTGAAAGCTTTTGGAAGGGATTGGACGGCAATTGGGCACAAATGAGATATCCTACAGATCATACATGTGTGGCAGGCTTACCAGTTGAGGACTGTGGCAGAGTTGCAGCGATAATGACACACAGTATTTTACCGTGCTATAAGATAACCTGCCCTACCTGTGCCCAACAATATGCCAACTTGCCAGCCAGTGACTTACTTAAGATATTACACAAGCACGCAAGTGATGGTTTAAATCGATTGGGGGCAGACAAAGATCGCTTTGTGCATGTCAAAAAGTTCTTGACAATCTTAGAGCACTTAACTGAACCGGTTGATCTGAGTCTAGAAATTTTCAATGAAGTATTCAAGTCTATAGGGGAGAAGCAACAATCACCTTTCAAAAACCTGAATATTCTGAATAATTTCTTTTTGAAAGGAAAGGAAAATACAGCTCGTGAATGGCAGGTGGCTCAATTAAGCTTACTTGAATTGGCAAGATTCCAAAAGAACAGAACGGATAATATCAAGAAAGGAGACATCTCGTTCTTTAGGAATAAACTATCTGCCAAAGCAAATTGGAACTTGTATCTGTCATGTGGTAACCAGCTGGATAAGAATGCAAACTTCCTGTGGGGACAGAGAGAATATCATGCTAAGCGATTTTTCTCGAACTATTTCGAGGAAATTGATCCAGCGAAGGGCTATTCAGCATACGAAAATCGTTTGCATCCGAATGGGACAAGAAAACTTGCAATTGGAAACCTAATTGTACCACTTGATCTGGCTGAGTTTAGGCGGAAGATGAAAGGTGATTATAAAAGACAGCCAGGGGTGAGTAAGAAGTGCACGAGCTCGAAGGATGGAAACTACGTGTATCCCTGTTGTTGCACTACACTTGATGATGGCTCAGCTGTTGAATCAACATTTTACCCGCCAACTAAGAAGCACCTCGTAATAGGTAATAGTGGCGATCAAAAGTATGTTGACTTACCAAAAGGGAATTCTGAGATGTTATATATTGCCAGGCAAGGTTTCTGTTACATTAACATTTTCCTCGCGATGTTGATTAACATTAGTGAGGAAGATGCAAAGGATTTCACTAAGAAGGTTCGTGACATGTGTGTGCCAAAGCTTGGAACCTGGCCAACCATGATGGATCTGGCTACAACTTGTGCTCAAATGAAAATATTCTACCCTGATGTTCATGATGCAGAACTGCCTAGAATACTAGTCGATCACGAAACGCAGACATGCCATGTGGTTGACTCGTTTGGCTCACAAACAACTGGGTATCATATTTTGAAAGCATCTAGCGTGTCCCAACTTATTTTGTTTGCTAATGATGAGTTGGAGTCTGACATTAAGCACTATAGAGTTGGTGGTATTCCTAATGCATGCCCTGAACTTGGGTCTACAAT-ATCACCTTTCAGAGAAGGAGGAGTTATAATGTCTGAGTCGGCAGCGCTGAAACTGCTTTTGAAGGGAATTTTTAGACCTAAGGTGATGAGACAGTTGCTGTTAGATGAGCCTTACCTGTTGATTCTATCAATATTATCCCCTGGCATACTGATGGCTATGTACAATAATGGGATTTTTGAACTTGCGGTAAGGTTGTGGATTAATGAGAAACAATCCATAGCTATGATAGCATCGCTACTATCAGCTTTAGCCCTACGAGTGTCAGCGGCAGAAACACTCGTCGCACAGAGGATTATAATTGATACTGCAGCCACAGATCTCCTTGATGCTACGTGCGATGGGTTCAACCTACATCTAACGTACCCCACTGCGTTGATGGTGTTGCAAGTTGTTAAGAATAGAAATGAATGTGATGATACCCTATTCAAGGCGGGTTTTCCAAGTTACAACACGAGCGTCGTACAGATCATGGAAAAAAATTATCTAAATCTCTTGAACGATGCTTGGAAAGATTTAACTTGGCGGGAAAAATTATCCGCAACATGGTACTCATACAGAGCAAAACGCTCTATCACTCGGTACATAAAACCCACAGGAAGGGCAGATTTGAAAGGGTTATACAACATATCACCACAAGCATTCTTGGGCCGAGGCGCCCAGGTGGTCAAAGGCACTGCCTCAGGATTGAGCGAGCGATTTAATAATTATTTCAATACTAAGTGTGTGAATATTTCATCCTTTTTCATTCGTAGAATCTTTAGGCGTTTGCCAACTTTCGTCACTTTTGTTAACTCATTATTAGTTATTAGTATGTTAACCAGCGTAGTGGCAGTGTGTCAGGCAATAATTTTAGATCAGAGGAAGTATAGGAGAGAAATTGAGTTGATGCAGATAGAGAAGAATGAGATCGTCTGCATGGAGCTATATGCAAGTTTACAGCGCAAACTTGAACGCGATTTCACATGGGATGAGTACATTGAGTATTTGAAGTCAGTAAACCCTCAGATAGTTCAGTTTGCTCAAGCGCAGATGGAAGAATATGATGTGCGACACCAGCGTTCCACACCAGGTGTTAAAAATTTGGAACAAGTGGTAGCATTTATGGCTTTAGTCATCATGGTGTTCGATGCTGAAAGGAGTGATTGCGTGTTCAAAACTCTCAATAAATTTAAGGGTGTCCTTTCCTCACTGGACCATGAAGTTAGACATCAGTCCTTAGACGATGTGATCAAGAATTTTGATGAGAGGAATGAGACTATTGATTTTGAATTGAGTGAGGACACAATTCGAACATCATCAGTGCTAGATACAAAGTTTAGTGATTGGTGGGACCGACAAATCCAGATGGGACATACACTTCCACATTACAGAACCGAGGGGCACTTCATGGAATTCACAAGAGCAACTGCTGTCCAAGTGGCTAATGATATCGCCCACAGCGAACACCTAGATTTTCTAGTAAGGGGAGCTGTTGGGTCTGGAAAGTCAACTGGGTTGCCTGTTCATCTTAGTGTAGCCGGATCTGTGCTTTTAATTGAACCAACGCGACCACTAGCGGAGAACGTTTTCAAACAGCTATCTAGTGAACCATTCTTCAAGAAGCCAACACTGCGTATGCGTGGAAATAGTATATTTGGCTCTTCTCCAATCTCCGTCATGACTAGCGGATTTGCGCTACACTACTTCGCCAATAATCGCTCTCAATTAGCTCAGTTCAACTTTGTGATATTTGATGAATGCCATGTTCTGGATCCTTCCGCAATGGCGTTCCGCAGTCTGCTGAGTGTTTATCATCAAGCATGCAAAGTATTAAAAGTGTCAGCTACTCCAGTGGGAAGAGAGGTTGAATTTACAACACAGCAACCAGTCAAGTTAATAGTGGAGGACACACTGTCTTTCCAATCATTTGTTGATGCACAAGGTTCTAAAACTAATGCTGATGTTGTTCAGTTTGGTTCAAACGTACTTGTGTACGTGTCGAGCTACAATGAAGTTGACACCTTGGCTAAGCTCCTAACAGACAAGAATATGATGGTCACAAAGGTTGATGGCAGAACAATGAAGCACGGTTGCCTAGAAATTGTCACAAAAGGAACCAGTGCGAGACCACATTTTGTTGTAGCAACCAACATAATTGAGAATGGAGTGACTTTGGACATAGACGTGGTTGTAGATTTTGGGTTGAAAGTCTCACCGTTCTTAGACATTGACAATAGGAGCATTGCTTACAATAAGGTGAGTGTTAGCTATGGTGAGAGAATTCAAAGGCTGGGTCGTGTTGGACGCTTCAAGAAAGGAGTGGCATTGCGCATTGGACACACTGAGAAGGGAATTATTGAAATTCCAAGCATGATCGCTACAGAGGCGGCTCTTGCTTGCTTTGCATATAACTTGCCAGTGATGACAGGAGGCGTCTCAACTAGTCTGATTGGCAATTGTACTGTGCGCCAAGTTAAAACAATGCAGCAATTTGAATTGAGTCCCTTCTTTATCCAGAATTTCGTTGCCCACGATGGATCAATGCATCCTGTCATACATGACATTCTTAAAAAGTATAAACTTCGAGATTGTATGACACCTTTGTGCGATCAGTCTATACCATACAGGGCATCGAGCACTTGGTTATCGGTTAGTGAATATGAGCGACTTGGAGTGGCCTTAGAAATTCCAAAGCAAGTCAAAATTGCATTCCATATCAAAGAGATCCCTCCTAAGCTCCACGAAATGCTTTGGGAAACGGTTGTCAAGTACAAAGACGTTTGCTTATTTCCAAGCATT-CGAGCATCGTCCATCAGCAAAATCGCATACACATTGCGTACAGACCTCTTCGCCATCCCAAGAACTCTAATATTGGTGGAGAGACTGCTTGAAGAGGAGCGAGTGAAGCAGAGCCAATTCAGAAGTCTCATCGACGAAGGATGCTCAAGCATGTTTTCAATTGTCAACTTGACAAACACTCTCAGAGCTAGATATGCAAAAGATTACACCGCAGAGAATATACAAAAACTTGAGAAAGTGAGAAGTCAATTGAAAGAATTCTCAAATTTGGATGGTTCTGCATGTGAGGAAAATTTAATAAAGAGGTATGAGTCTTTGCAGTTCGTTCATCACCAAGTTGCGACGTCACTTGCAAAGGATCTCAAGTTGAAGGGGACTTGGAAGAAGTCATTAGTGGCCAAAGATTTGATCATAGCAGGCGCTGTTGCAATTGGTGGAATAGGACTCATATATAGTTGGTTCACACAATCAGTTGAGACTGTGTCTCACCAAGGGAAAAATAAATCCAAAAGAATTCAAGCCTTGAAGTTTCGCCATGCTCGTGACAAAAGGGCTGGCTTTGAAATTGACAACAATGATGACACAATAGAGGAATTCTTTGGATCTGCATACAGGAAGAAGGGAAAAGGTAAAGGCACCACTGTTGGTATGGGCAAGTCAAGCAGGAGGTTTGTTAATATGTATGGATTTGACCCAACAGAATATTCATTCATCCAGTTCGTTGATCCGCTCACTGGAGCTCAAATTGAAGAGAACGTCTATGCTGATATTAGAGACATCCAAGAGCGCTTTAGTGATGTCCGCAAGAAAATGGTGGAGGATGATGAAATCGAATTGCAAGCATTGGGCAGCAACACAACCATTCATGCTTACTTCAGGAAAGATTGGTCTGACAAGGCTCTAAAAATTGATTTGATGCCACACAACCCACTCAAAATCTGTGATAAATCGAATGGCATTGCTAAGTTTCCTGAAAGAGAACTTGAGTTGAGACAAACTGGGCCAGCAATAGAGGTTGATGTGAAAGACATTCCAAAACAGGAAGTGGAGCATGAAGCCAAATCACTCATGAGAGGTTTAAGGGATTTCAATCCAATTGCTCAAACAGTTTGCAGAGTAAAAGTGTCTGTTGAATATGGAACGTCTGAAATGTATGGGTTCGGTTTTGGTGCGTATATTATAGTAAACCACCATCTATTCAAGAGTTTCAATGGATCCATGGAAGTGCGATCAATGCATGGAACATTCAGAGTGAAGAATTTGCATAGCTTGAGCGTTTTACCGATCAAAGGCAGAGACATTATCATCATAAAGATGCCAAAGGATTTCCCTGTTTTCCCACAAAAACTGCACTTCCGAGCTCCAGTGCAGAATGAGAGGATTTGTTTGGTTGGAACTAATTTTCAAGAAAAACATGCATCATCAATCATCACAGAAACGAGTACTACATACAATGTACCGGGCAGCACTTTTTGGAAGCATTGGATTGAAACAAATGATGGGCATTGTGGATTACCAGTAGTGAGTACAGCTGATGGTTGTCTAGTTGGAATACACAGCTTGGCGAATAATGTGCAAACCACGAATTATTATTCAGCCTTTGATGAGGATTTTGAAAGTAAGTATCTCCGAACTAATGAGCATAATGAGTGGACCAAATCGTGGGTATATAACCCAGATACTGTGTTGTGGGGTCCATTGAAGCTCAAGGAGAGTACCCCTAAAGGCCTGTTTAAGACAACAAAACTTGTACAGGATTTAAT------TGATCATGATGTTGTTGTAGAGCAAGCTAAACATTCTGCGTGGATGTATGAGGCTCTAACAGGGAATTTGCAAGCTGTGGCGACAATGAAGAGTCAGCTGGTGACAAAGCACGTGGTCAAAGGGGAGTGTCGGCACTTCAAAGAGTTCTTAACTGTGGATTCGGAAGCAGAAGCT------TTCTTCAGGCCTTTGATGGATGCTTATGGGAAGAGCTTGTTAAATAGAGAAGCATATATAAAGGACATAATGAAATACTCAAAGCCTATTGATGTTGGAACAGTAGACTGTGAT--GCTTTTGAAGAGGCTATCAATAGGGTTATCATTTATCTGCAA-GTGCATGGCTTCCAGAAATGCAATTACATCACCGATGAGCAGGAAATTTTCAAAGCTCTCAATATGAAAGCTGCTGTCGGAGCTATGTATGGAGGCAAGAAGAAAGACTACTTCGAGCATTTTACTGAGGCGGATAAAGAGGAAATTGTTATGCAAAGTTGCCTTCGATTGTACAAGGGCTCGCTTGGCATATGGAATGGATCGTTGAAGGCAGAACTTCGGTGCAAAGAGAAGATACTTGCAAATAAGACAAGGACATTCACTGCTGCACCTTTAGATACTCTACTGGGTGGAAAGGTGTGCGTTGATGATTTTAATAATCAATTCTACTCGAAGAACATTGAATGCTGCTGGACTGTTGGAATGACTAAGTTTTATGGAGGTTGGGACAAATTGCTTCGGCGTCTACCTGAAAATT---GGGTGTACTGCGATGCCGATGGTTCACAATTCGATAGTTCACTCACCCCATACCTAATTAATGCTGTTCTCATCATCAGAAGCACATACATGGAAGATTGGGACTTGGGGTTGCAAATGTTGCGCAATTTGTACACAGAAATAATTTACACACCAATCTCAACTCCAGATGGAACAATTGTCAAGAAGTTTAGAGGTAATAATAGCGGTCAACCTTCTACCGTTGTGGATAATTCTCTCATGGTTGTCCTTGCTATGCATTACGCTCTCATTAAGGAGTGCGTTGAGTTTGAAGAAATCGACAGCACGTGTGTATTCTTTGTTAATGGTGATGACTTATTGATTGCTGTGAATCCGGAGAAAGAGAGCATTCTCGATAGAATGTCACAACATTTCTCAGATCTTGGTTTGAACTATGATTTTTCGTCGAGAACAAGAAGGAAGGAGGAATTGTGGTTCATGTCCCATAGAGGCCTGCTAATCGAGGGTATGTACGTGCCAAAGCTTGAAGAAGAGAGAATTGTATCCATTTTGCAATGGGATAGAGCTGATCTGCCAGAGCACAGATTAGAAGCGATTTGTGCAGCAATGATAGAATCCTGGGGTTATTTTGAGTTAACGCACCAAATCAGGAGATTTTACTCATGGTTGTTGCAACAGCAACCTTTTTCAACGATAGCACAGGAAGGAAAAGCTCCATACATAGCGAGCATGGCATTGAAGAAGCTGTACATGAATAGGACAGTAGATGAGGAGGAACTGAAGGCTTTCACTGAAATGATG?GTTGCCTTGGATGATGAACTTGAGTGCGATACTTATGAAGTGCACCATCAAGGAAAT---------GACACAATCGATGCAGGAGGAAGCACTAAGAAGGATGCAAAACAAGAGCAAGGTAGCATTCAACCAAATCTCAACAAGGAAAAG---------------------------GAAAAGGACGTGAATGTTGGAACATCTGGAACTCATACTGTGCCACGAATTAAAGCTATCACGTCCAAAATGAGAATGCCCAAGAGTAAAGGTGCAACTGTACTAAATTTGGAACACTTACTCGAGTATGCTCCACAGCAAATTGACATCTCAAATACTCGAGCAACTCAATCACAGTTTGATACGTGGTATGAAGCGGTACAACTTGCATACGACATAGGAGAAACTGAAATGCCAACTGTGATGAATGGGCTTATGGTTTGGTGCATTGAAAATGGAACCTCGCCAAACATCAACGGAGTTTGGGTTATGATGGATGGAGATGAACAAGTCGAATACCCACTGAAACCAATCGTTGAGAATGCAAAACCAACACTTAGGCAAATCATGGCACATTTCTCAGATGTTGCAGAAGCGTATATAGAAATGCGCAACAAAAAGGAACCATATATGCCACGATATGGTTTAGTTCGTAATCTGCGCGATGGAAGTTTGGCTCGCTATGCTTTTGACTTTTATGAGGTCACATCACGAACACCAGTGAGGGCTAGGGAAGCGCACATTCAAATGAAGGCCGCAGCATTGAAATCAGCTCAACCTCGACTTTTCGGGTTGGACGGTGGCATTAGTACACAAGAGGAGAACACAGAGAGGCACACCACCGAGGATGTCTCTCCAAGTATGCATACTCTACTTGGAGTCAAGAACATGTGAATGTAGTGTCTCTCCGGACGATATATAAGTATTTACA-TATGCAGTAAGTATTTTGGCTTTTCCTGTACTACTTTTATCATAATTAATAATCAGTTTGAATATTACTAATAGATAGAGGTGGCAGGGTGATTTCGTCATTGT-GGTGACTCTATCTTTTAATTCCGCATTATT-------------------------------------------------------------------------------------------------------------------------------------------------------------------------------------------------------------------------------------AAGTCTTAGATAAAAGTGCCGGGTTGTCGTTGTTGTGGATGATTCATCGATTAGGTGATGTTGCGATTCTGTCGTAGCAGTGACTATGTCTGGATCTATCTG-CTTGGGTGGTGTTGTGATTTCGTCATAACAGTGACTGTAAACTTCAATCAGGAGA?
	HN2          ?AATTAAAACAACTCAATACAACATAAGAAAATCAACGCAAAAACACTCACAAAAGCTTTCAACTCTAATTCAAACAATTTGTTAAGTTTCAATTTCAATCTTCATCAAACAAACTCTTTCAATTTCAGTGTAAGCTATCGTAATTCAGTAAGTTATTTCAAACTCTCGTAAATTGCAGAAGATCATCCATGGCAACTTACACATCAACAATCCAGTTTGGTTCCATTGAATGCAAACTTCCATACTCACCCGCCCCTTTTGGGCTAGTTGCGGGGAAACGAGAAGTTTCAACC-------------------------------------------------------------------------------------------------------------------------------------------------------------------------------------------------------------------------------------------------------------------------------------------------------------------------------------------------------------------------------------------------------------------------------------------------------------------------------------------------------------------------------------------------------------------------------------------------------------------------------------------------------------------------------------------------------------------ACCACTGACCCCTTCGCAAGTTTGGAGATGCAGCTTAGTGCGCGATTACGAAGGCAGGAGTTTGCAACTATTCGAACATCCAAGAATGGTACTTGCATGTATCGATACAAGACTGATGTCCAGATTGCGCGCATTCAAAAGAAGCGCGAGGAAAGAGAAAGAGAGGAATATAATTTCCAAATGGCTGCGTCAAGTGTTGTGTCGAAGATCACTATTGCTGGTGGAGAGCCACCTTCAAAACTTGAATCACAAGTGCGGAGGGGTGTCATCCACACAACTCCAAGGATGCGCACAGCAAAAACATATCACACGCCAAAGTTGACAGAGGGACAAATGAACCACCTTATCAAGCAGGTGAAGCAAATTATGTCAACCAAAGGAGGGTCTGTTCAACTGATTAGCAAGAAAAGTACCCATGTTCACTATAAAGAAGTTTTGGGATCACATCGCGCAGTTGTTTGCACTGCA?CATATGAGAGGTTTACGAAAGAGAGTGGACTTTCGGTGTGATAAATGGACCGTTGTGCGTCTACAGCATCTCGCCAGGACGGACAAGTGGACTAACCAAGTTCGTGCTACTGATCTACGCAAGGGTGATAGTGGAGTTATATTGAGTAATACTAATCTCAAAGGAAACTTTGGGAGAAGTTCGGAGGGCCTATTTATAGTGCGTGGGTCGCATGAAGGAAAAATCTATGATGCACGTTCCAAGGTTACCCAAGGGGTTATGGACTCAATGATTCAGTTCTCTAGCGCTGAAAGCTTTTGGAAGGGATTGGACGGCGATTGGGCACAAATGAGATATCCTACAGATCATACATGTGTGGCAGGCTTACCAGTTGAAGACTGTGGCAGAGTTGCAGCGATAATAACACACAGTATTTTACCGTGCTATAAAATAACCTGCCCTACCTGCGCCCAACAATATGCCAACTTGCCAGCCAGTGACTTACTTAAGATATTACACAAGCACGCAAGTGATGGTCTAAATCGATTGGGGGCAGACAAAGATCGCTTTGTGCATGTCAAAAAGTTCTTGACAATCTTAGAGCACTTAACTGAACCGGTTGATCTGAGTCTAGAAATTTTCAATGAAGTATTCAAGTCTATAGGGGAGAAGCAACAATCACCTTTCAAAAACCTGAATATTCTGAATAATTTCTTTTTGAAAGGAAAGGAAAATACAGCTCGTGAATGGCAGGTGGCTCAATTAAGCTTACTTGAATTGGCAAGATTCCAAAAGAACAGAACGGATAATATCAAGAAAGGAGACATCTCGTTCTTTAGGAATAAACTATCTGCCAAAGCAAATTGGAACTTGTATCTGTCATGTGATAACCAGCTGGATAAGAATGCAAATTTCCTGTGGGGACAGAGGGAATATCATGCTAAGCGATTTTTCTCGAACTATTTCGAGGAAATTGATCCAGCGAAGGGCTATTCAGCATACGAAAATCGTTTGCATCCGAATGGGACAAGAAAACTTGCAATTGGAAACCTAATTGTACCACTTGATCTGGCTGAGTTTAGGCGGAAGATGAAAGGTGATTATAAAAGACAGCCAGGGGTGAGTAAGAAGTGCACGAGCTCGAAGGATGGAAACTACGTGTATCCCTGTTGTTGCACTACACTTGATGATGGCTCAGCTGTTGAATCAACATTTTACCCGCCAACTAAGAAGCACCTCGTAATAGGTAATAGTGGCGACCAAAAGTATGTTGACTTACCAAAAGGGAATTCTGAGATGTTATATATTGCCAGGCAAGGCTTCTGTTACATTAACATTTTCCTCGCGATGTTGATTAACATTAGTGAGGAAGATGCAAAGGATTTCACTAAGAAGGTTCGTGACATGTGTGTGCCAAAGCTTGGAACCTGGCCAACCATGATGGATCTGGCTACAACTTGTGCTCAAATGAAAATATTCTACCCTGATGTTCATGATGCAGAACTGCCTAGAATACTAGTCGATCACGAAACGCAGACATGCCATGTGGTTGACTCGTTTGGCTCACAAACGACTGGGTATCATATTTTGAAAGCATCTAGCGTGTCCCAACTTATTTTGTTTGCTAATGATGAGTTGGAGTCTGACATTAAGCACTATAGAGTTGGTGGTATTCCTGGAGCATGCCCTGAGCTTGGGTCCACAAT-ATCACCTTTTAGAGAAGGAGGAATCATAATGTCTGAGTCAGCAGCGCTAAAACTGCTCCTAAAGGGAATTTTTAGACCTAAGGTGATGAGACAGTTGCTGTTAGATGAGCCTTACCTGTTGATTCTATCAATATTATCTCCTGGCATACTGATGGCTATGTATAATAATGGGATTTTTGAACTTGCGGTAAGGTTGTGGATTAATGAGAAACAATCCATAGCCATGATAGCATCGCTACTATCAGCTTTAGCCCTACGAGTGTCGGCGGCAGAAACACTTGTCGCACAGAGGATTATCATTGATGCTGCAGCTACAGACCTCCTTGATGCTACGTGTGATGGGTTCAACCTACATCTAACGTACCCCACTGCATTGATGGTGTTGCAAGTTGTTAAGAATAGAAATGAATGTGATGATACCCTATTCAGGGCGGGTTTTTCAAGTTACAACACGAGCGTCGTACAGATTATGGAAAAAAATTATCTAAATCTCTTGGACGATGCTTGGAGAGATTTAACTTGGCGGGAAAAATTATCCGCAACATGGTACTCATACAGAGCAAAACGCTCTATCACTCGGTACATAAAACCCACAGGAAGGGCAGATTTGAAAGGGTTATACAACATATCACCACAAGCATTCTTGGGCCGAAGCGCCCAGGTGGTCAAAGGTACTGCCTCAGGATTGAGCGAGCGATTTAATAATTATTTCAATACTAAGTGTGTAAATATTTCATCCTTTTTCATTCGTAGAATCTTTAGGCGTTTGCCAACTTTTGTCACTTTTGTTAACTCATTATTAGTTATTAGTATGTTGACTAGCGTAGTGGCAGTGTGTCAGGCAATAATTTTAGATCAGAGGAAGTATAGGAGAGAAATCGAGTTGATGCAGATAGAGAAGAATGAAATTGTCTGCATGGAGCTATATGCAAGTTTACAGCGCAAACTTGAACGCGATTTCACATGGGATGAGTACATTGAGTATTTGAAATCAGTAAACCCTCAGATAGTTCAGTTTGCTCAAGCGCAGATGGAAGAATATGATGTGAGACACCAGCGTTCCACACCAGGTGTTAAAAATTTGGAACAAGTGGTAGCATTTATGGCTTTAGTCATCATGGTGTTCGATGCTGAAAGGAGTGATTGCGTGTTCAAGACTCTCAATAAATTTAAGGGTGTCCTTTCCTCAATGGACCATGAAGTTAGACATCAGTCCTTAGACGATGTGATCAAGAACTTTGATGAGAGGAATGAGATTATTGATTTTGAATTGAGTGAGGACACAATTCGAACATCATCAGTGCTAGATACAAAGTTTAGTGATTGGTGGGACCGACAAATCCAGATGGGACATACACTTCCACATTACAGAACCGAGGGGCACTTCATGGAATTTACAAGAGCAACTGCTGTTCAAGTGGCTAATGATATTGCCCATAGCGAACATCTAGACTTTCTAGTAAGGGGAGCTGTTGGGTCTGGAAAGTCAACTGGGTTGCCTGTTCATCTTAGTGTAGCTGGATCTGTGCTTTTGATTGAACCAACGCGACCACTAGCGGAGAACGTTTTCAAACAGCTATCTAGTGAACCATTCTTCAAGAAGCCAACACTGCGTATGCGTGGAAATAGTATATTTGGCTCTTCTCCAATCTCCGTCATGACTAGTGGATTTGCACTACACTACTTTGCCAATAATCGCTCTCAATTAGCTCAGTTCAACTTTGTAATATTTGATGAGTGCCATGTTCTGGATCCTTCCGCAATGGCGTTCCGCAGTCTGCTGAGTGTTTATCATCAAGCATGCAAAGTATTAAAAGTGTCAGCTACTCCAGTGGGAAGAGAGGTTGAATTTACAACACAGCAACCAGTCAAGTTAATAGTGGAGGACACACTGTCTTTCCAATCATTTGTTGATGCACAAGGTTCTAAAACTAATGCTGATGTTGTTCAGTTTGGTTCGAACGTACTTGTGTACGTGTCGAGCTACAATGAAGTTGATACCTTGGCTAAGCTCCTAACAGACAAGAATATGATGGTCACAAAGGTTGATGGCAGAACAATGAAGCACGGTTGCCTAGAAATTGTCACAAAAGGAACCAGTGCGAGACCACATTTTGTTGTAGCAACCAACATAATTGAGAATGGAGTGACTTTGGACATAGACGTGGTTGTAGATTTTGGGTTGAAAGTCTCACCGTTCTTGGACATTGACAATAGGAGCATTGCTTACAATAAGGTGAGTGTTAGCTATGGTGAGAGAATTCAAAGGCTGGGTCGTGTTGGACGCTTCAAGAAAGGAGTAGCATTGCGCATTGGACACACTGAGAAGGGAATTATTGAAATTCCAAGCATGATCGCCACAGAGGCGGCTCTTGCTTGCTTTGCATATAACTTGCCAGTGATGACAGGAGGCGTCTCAACTAGTCTGATTGGCAATTGTACTGTGCGCCAAGTTAAAACAATGCAGCAATTTGAATTGAGTCCCTTCTTTATCCAGAATTTCGTCGCCCATGATGGATCAATGCATCCTGTCATACATGACATTCTTAAAAAGTATAAACTTCGAGATTGTATGACACCTTTGTGCGATCAGTCTATACCATACAGGGCATCGAGCACTTGGTTATCGGTTAGTGAATATGAGCGACTTGGAGTGGCCTTAGAAATTCCAAAGCAAGTCAAAATTGCATTCCATATCAAAGAGATCCCTCCTAAGCTCCACGAAATGCTTTGGGAAACGGTTGTCAAGTACAAAGACGTTTGCTTATTTCCAAGTATT-CGAGCATCGTCCATCAGCAAAATCGCATACACATTGCGTACAGACCTCTTCGCCATCCCAAGAACTCTAATATTGGTGGAGAGACTGCTTGAAGAGGAGCGAGTGAAGCAGAGCCAATTCAGAAGTCTCATCGATGAAGGATGCTCAAGCATGTTTTCAATTGTCAATTTGACAAACACTCTCAGAGCTAGATATGCAAAAGATTACACCGCAGAGAACATACAAAAACTTGAGAAAGTGAGAAGTCAATTGAAAGAATTCTCAAATTTGGATGGTTCTGCATGTGAGGAAAATTTAATAAAGAGGTATGAGTCTTTGCAGTTCGTTCATCACCAAGCTACGACGTCACTTGCAAAGGATCTCAAGTTGAAGGGGACTTGGAAGAAGTCATTAGTGGCCAAAGACTTGATCATAGCAGGCGCTGTTGCAATTGGTGGAATAGGACTCATATATAGTTGGTTCACACAATCAGTTGAGACTGTGTCTCACCAAGGGAAAAATAAATCCAAAAGAATTCAAGCCTTGAAGTTTCGCCATGCTCGTGACAAAAGGGCTGGTTTTGAAATTGACAACAATGATGACACAATAGAGGAATTCTTTGGATCTGCATACAGGAAAAAGGGAAAAGGTAAAGGTACCACTGTTGGTATGGGCAAGTCAAGCAGGAGGTTTGTTAATATGTATGGATTTGACCCAACAGAATATTCATTCATCCAGTTCGTTGATCCGCTCACTGGAGCTCAAATTGAAGAGAACGTCTATGCTGACATTAGAGACATCCAAGAGCGCTTTAGTGATGTCCGCAAGAAAATGGTAGAGGATGATGAAATCGAATTGCAAGCATTGGGCAGCAACACAACCATTCATGCTTACTTCAGGAAAGATTGGTCTGACAAGGCTCTTAAAATTGATTTGATGCCACACAACCCACTCAAAATCTGTGATAAATCGAATGGTATTGCTAAGTTTCCTGAGAGAGAACTTGAGTTGAGGCAAACTGGGCCAGCAATAGAGGTTGATGTGAAAGACATTCCAAAACAGGAAGTGGAGCATGAAGCCAAATCACTCATGAGAGGTTTAAGGGATTTCAATCCAATTGCTCAAACAGTTTGCAGAGTAAAAGTGTCTGTTGAATATGGAACGTCTGAAATGTATGGGTTCGGTTTTGGTGCGTATATTATAGTAAACCACCATCTATTCAAGAGCTTCAATGGATCCATGGAAGTGCGATCAATGCATGGAACATTCAGAGTGAAGAATTTGCATAGCTTGAGCGTTTTACCGATCAAAGGCAGAGACATTATCATCATAAAGATGCCAAAGGATTTCCCTGTTTTCCCACAAAAACTGCACTTCCGAGCTCCAGTGCAGAATGAGAGGATTTGTTTGGTTGGAACTAATTTTCAAGAAAAACATGCATCATCAATCATCACAGAAACGAGTACCACATACAATGTACCGGGCAGCACTTTTTGGAAGCATTGGATTGAAACAAATGATGGGCATTGTGGATTACCAGTAGTGAGTACAGCTGATGGATGTCTAGTTGGAATACACAGCTTGGCGAATAATGTGCAAACCACGAATTATTATTCAGCCTTTGATGAGGATTTTGAAAGTAAGTATCTCCGAACTAATGAGCATAATGAGTGGACCAAATCGTGGGTATATAACCCAGATACTGTGTTGTGGGGTCCGTTGAAGCTCAAGGAGAGTACCCCTAAAGGCCTGTTTAAGACAACAAAACTTGTACAGGATTTAAT------TGATCATGATGTTGTTGTAGAGCAAGCTAAACATTCTGCGTGGATGTATGAGGCTCTAACAGGGAATTTGCAAGCTGTGGCGACAATGAAGAGTCAGCTGGTGACAAAGCACGTGGTCAAAGGGGAGTGTCGGCACTTCAAAGAGTTCTTAACTGTGGATTCGGAAGCAGAAGCT------TTCTTCAGGCCTTTGATGGATGCTTATGGGAAGAGCTTATTAAATAGAGAAGCATATATAAAGGACATAATGAAATACTCAAAGCCTATTGATGTTGGAATAGTAGACTGTGAT--GCTTTTGAAGAGGCTATCAATAGGGTTATCATTTATCTGCAA-GTGCATGGCTTCCAGAAATGCAATTACATCACCGATGAGCAGGAAATTTTCAAAGCTCTCAATATGAAAGCTGCTGTCGGAGCTATGTATGGAGGCAAGAAGAAAGACTACTTCGAGCATTTTACTGAGGCGGATAAAGAGGAAATTGTTATGCAAAGTTGCTTTCGATTGTACAAGGGCTCGCTTGGCATATGGAATGGATCATTGAAAGCAGAACTTCGGTGCAAAGAGAAGATACTTGCAAATAAGACAAGGACATTCACTGCTGCACCTTTAGATACTTTATTGGGTGGAAAGGTGTGCGTTGATGATTTTAATAATCAATTCTACTCAAAGAACATTGAATGCTGCTGGACCGTTGGAATGACTAAGTTTTATGGAGGTTGGGACAAATTGCTTCGGCGTCTACCTGAAAATT---GGGTGTACTGCGATGCCGATGGTTCACAATTCGATAGTTCACTCACCCCATACCTAATTAATGCTGTTCTCATCATCAGAAGCACATACATGGAAGATTGGGACCTGGGGTTGCAAATGTTGCGCAATTTGTACACAGAAATAATTTACACACCAATCTCAACTCCAGATGGAACAATTGTCAAGAAGTTTAGAGGTAATAATAGCGGTCAACCTTCTACCGTTGTGGATAATTCTCTCATGGTTGTCCTTGCTATGCATTACGCTCTCATCAAGGAGTGCGTCGAGTTTGAAGAAATCGACAGCACGTGTGTATTCTTTGTTAATGGTGATGACTTATTGATTGCTGTGAATCCGGAAAAAGAGAGCATTCTCGATAGAATGTCACAACATTTCTCAGATCTTGGTTTGAACTATGATTTTTCGTCGAGAACAAGAAGGAAGGAGGAATTGTGGTTCATGTCCCATAGAGGCCTGCTAATCGAGGGTATGTACGTGCCAAAGCTTGAAGAAGAGAGAATTGTATCCATTCTGCAATGGGATAGAGCTGATCTGCCAGAGCACAGATTAGAAGCGATCTGTGCAGCAATGATAGAATCCTGGGGTTATTTTGAGTTAACGCACCAAATCAGGAGATTCTACTCATGGTTGTTGCAACAGCAACCTTTTTCAACGATAGCACAGGAAGGAAAAGCTCCATACATAGCGAGCATGGCATTGAAGAAGCTGTACATGGATAGGACAGTGGATGAGGAGGAACTGAAGGCTTTCACTGAAATGATG?GTTGCCTTGGATGATGAATTTGAGTGCGATACTTATGAAGTACACCATCAAGCAAAT---------GACACAATCGATGCAGGAGGAAGCAGCAAGAAAGATGCAAGACCAGAGCAAGGCAGCATCCAGTCAAACCCGAACAAAGGAAAA---------------------------GATAAGGATGTGAATGCTGGTACATCTGGGACACATACTGTGCCGAGAATCAAGGCTATCACGTCCAAAATGAGAATGCCCAAAAGCAAGGGAGCAACCGTGCTAAACTTAGAACACTTGCTTGAGTATGCTCCACAACAAATTGATATTTCAAATACTCGGGCAACTCAATCACAGTTTGATACGTGGTATGAGGCAGTGCGGATGGCATACGACATAGGAGAAACTGAGATGCCAACTGCGATGAATGGGCTTATGGTTTGGTGCATTGAAAATGGAACCTCGCCAAATGTCAACGGAGTCTGGGTTATGATGGATGGGGATGAACAAGTCGAGTACCCGTTGAAACCAATCGTTGAGAATGCAAAACCAACCCTTAGGCAAATCATGGCACATTTCTCAGATGTTGCAGAAGCGTATATAGAAATGCGCAACAAAAAGGAACCATATATGCCACGATATGGTTTAATTCGAAATCTGCGGGATGTGGGTTTAGCGCGTTATGCCTTTGACTTTTATGAGGTCACATCACGAACACCAGTGAGGGCTAGGGAAGCGCACATTCAAATGAAGGCCGCAGCATTGAAATCAGCCCAACCTCGACTTTTCGGGTTGGACGGTGGCATCAGTACACAAGAGGAGAACACAGAGAGGCACACCACCGAGGATGTCTCTCCAAGTATGCATACTCTACTTGGAGTCAAGAACATGTGAT?GTAGTGTCTCTCCGGACGATATATAAGTATTTACA-TATGCAGTAAGTATTTTGGCTTTTCCTGTACTACTTTTATCATAATTAATAATCAGTTTGAATATTACTAATAGATAGAGGTGGCAGGGTGATTTCGTCATTGT-GGTGACTCTATCTTTTAATTCCGCATTATT-------------------------------------------------------------------------------------------------------------------------------------------------------------------------------------------------------------------------------------AAGTCTTAGATAAAAGTGCCGGGTTGTCGTTGTTGTGGATGATTCATCGATTAGGTGATGTTGCGATTCTGTCGTAGCAGTGACTATGTCTGGATCTATCTG-CTTGGGTGGTGTTGTGATTCCGTCATAACAGTGACTGTAAACTTCAATCAGGAGA?
	HN1          ?AATTAAAACAACTCAATACAACATAAGAAAATCAACGCAAAAACACTCACAAAAGCTTTCAACTCTAATTCAAACAATTTGTTAAGTTTCAATTTCGATCTTCATCAAACAAACTCTTTCAATTTCAGTGTAAGCTATCGTAATTCAGTAAGTTATTTCAAACTCTCGTAAATTGCAGAAGATCATCCATGGCAACTTACACATCAACAATCCAGTTTGGTTCCATTGAATGCAAACTTCCATACTCACCCGCTCCTTTTGGGCTAGTTGCGGGGAAACGAGAAGTTTCAACC-------------------------------------------------------------------------------------------------------------------------------------------------------------------------------------------------------------------------------------------------------------------------------------------------------------------------------------------------------------------------------------------------------------------------------------------------------------------------------------------------------------------------------------------------------------------------------------------------------------------------------------------------------------------------------------------------------------------ACCACTGACCCCTTCGCAAGTTTGGAGATGCAGCTTAGTGCGCGATTACGAAGGCAAGAGTTTGCAACTATTCGAACATCCAAGAATGGTACTTGCATGTATCGATACAAGACTGATGTCCAGATTGCGCGCATTCAAAAGAAGCGCGAGGAGAGAGAAAGAGAGGAATATAATTTCCAAATGGCTGCGTCAAGTGTTGTGTCGAAGATCACTATTGCTGGTGGAGAGCCACCTTCAAAACTTGAATCACAAGTGCGGAGGGGTGTCATCCACACAACTCCAAGGATGCGCACAGCAAAAACATATCACACGCCAAAGTTGACAGAGGGACAAATGAACCACCTTATCAAGCAGGTGAAGCAAATTATGTCAACCAAAGGAGGGTCTGTTCAACTGATTAGCAAGAAAAGTACCCATGTTCACTATAAAGAAGTTTTGGGATCACATCGCGCAGTTGTTTGCACTGCA?CATATGAGAGGTTTACGAAAGAGAGTGGACTTTCGGTGTGATAAATGGACCGTTGTGCGTCTACAGCATCTCGCCAGGACGGACAAGTGGACTAACCAAGTTCGTGCTACTGATCTACGCAAGGGCGATAGTGGAGTTATATTGAGTAATACTAATCTCAAAGGAAACTTTGGAAGAAGCTCGGAGGGCCTATTCATAGTGCGTGGGTCGCACGAAGGAAAAATCTATGATGCACGTTCCAAGGTTACTCAAGGGGTTATGGATTCAATGGTTCAGTTCTCAAGCGCTGAAAGCTTTTGGAAGGGATTGGATGGCAATTGGGCACAAATGAGATATCCTACAGATCATACATGTGTGGCAGGCTTACCAGTTGAAGACTGTGGCAGAGTTGCAGCGATAATGACACACAGTATTTTACCGTGCTATAAGATAACCCGCCCCACCTGTGCCCAACAATATGCCAACTTGCCAGCCAGTGACTTACTTAAGATATTACACAAGCACGCAAGTGATGGTTTAAATCGATTGGGGGCAGACAAAGATCGCTTTGTGCATGTCAAAAAGTTCTTGACAATCTTAGAGCACTTAACTGAACCGGTCGATCTGAGTCTAGAAATTTTCAATGAAGTATTCAAGTCTATAGGGGAGAAGCAACAATCACCTTTCAAAAACCTGAATATTCTGAATAATTTCTTTTTGAAAGGAAAGGAAAATACAGCTCGTGAATGGCAGGTGGCTCAATTAAGCTTACTTGAATTGGCAAGATTCCAAAAGAACAGAACGGATAATATCAAGAAAGGAGACATCTCGTTCTTCAGGAATAAACTATCTGCCAAAGCAAATTGGAACTTGTATCTGTCATGTGATAACCAGCTGGATAAGAATGCAAACTTCCTGTGGGGACAGAGAGAATATCATGCTAAGCGATTTTTCTCGAACTATTTCGAGGAAATTGATCCAGCGAAGGGCTATTCAGCATACGAAAATCGTTTGCATCCGAATGGGACAAGAAAACTTGCAATTGGAAACCTAATTGTACCACTTGATCTGGCTGAGTTTAGGCGGAAGATGAAAGGTGATTATAAAAGACAGCCAGGGGTGAGTAAGAAGTGCACGAGCTCGAAGGATGGAAACTACGTGTACCCCTGTTGTTGCACTACACTTGATGATGGCTCAGCTGTTGAATCAACATTTTACCCGCCAACTAAGAAGCACCTCGTAATAGGTAATAGTGGCGATCAAAAGTATGTTGATCTACCAAAAGGGAATTCTGAGATGTTATATATTGCCAGGCAAGGTTTCTGTTACATTAACATTTTCCTCGCGATGTTGATTAACATTAGTGAGGAAGATGCAAAGGATTTCACTAAGAAGGTTCATGACATGTGTGTGCCAAAGCTTGGAACCTGGCCAACCATGATGGATCTGGCTACAACTTGTGCTCAAATGAAAATATTCTACCCTGATGTTCATGATGCAGAACTGCCTAGAATACTAGTCGATCACGAAACGCAGACATGCCATGTGGTTGACTCGTTTGGCTCACAAACAACTGGGTATCATATTTTGAAAGCATCTAGCGTGTCCCAACTTATTTTGTTCGCTAATGATGAGTTGGAGTCTGACATTAAGCACTATAGAGTTGGTGGTATTCCTAATGCATGCCCTGAACTTGGGTCTACAAT-ATCACCTTTCAGAGAAGGAGGAGTTATAATGTCTGAGTCGGCAGCGCTGAAATTGCTTTTGAAGGGAATTTTTAGACCTAAGGTGATGAGACAGTTGCTGTTAGATGAGCCTTACCTGTTGATTCTATCAATATTATCCCCTGGCATACTGATGGCTATGTACAATAATGGGATTTTTGAACTTGCGGTAAGGTTGTGGATTAATGAGAAACAATCCATAGCTATGATAGCATCGCTACTATCAGCTTTAGCCCTACGAGTGTCAGCGGCAGAAACACTCGTCGCACAGAGGATTATAATTGATACTGCAGCTACAGATCTCCTTGATGCTACGTGCGATGGGTTCAACCTACATCTAACGTACCCCACTGCGTTGATGGTGTTGCAAGTTGTTAAGAATAGAAATGAATGTGATGATACCCTATTCAAGGCGGGTTTTCCAAGTTACAACACGAGCGTCGTACAGATCATGGAAAAAAATTATCTAAATCTCTTGAACGATGCTTGGAAAGATTTAACTTGGCGGGAAAAATTATCCGCAACATGGTACTCATACAGAGCAAAACGCTCTATCACTCGGTACATAAAACCCACAGGAAGGGCAGATTTGAAAGGGTTATACAACATATCACCACAAGCATTCTTGGGCCGAGGCGCCCAGGTGGTCAAAGGCACTGCCTCAGGTTTGAGCGAGCGATTTAATAATTATTTCAATACTAAGTGTGTGAATATTTCATCCTTTTTCATTCGTAGAATCTTTAGGCGTTTGCCAACTTTCGTCACTTTTGTTAACTCATTATTAGTTATTAGTATGTTAACCAGCGTAGTGGCAGTGTGTCAGGCAATAATTTTAGATCAGAGGAAGTATAGGAGAGAGATCGAGTTGATGCAGATAGAGAAGAATGAGATCGTCTGCATGGAGCTATATGCAAGTTTACAGCGCAAACTTGAACGCGATTTCACATGGGATGAGTACATTGAGTATTTGAAGTCAGTAAACCCTCAGATAGTTCAGTTTGCTCAAGCGCAGATGGAAGAATATGATGTGCGACACCAGCGTTCCACACCAGGTGTTAAAAATTTGGAACAAGTGGTAGCATTTATGGCTTTAGTCATCATGGTGTTCGATGCTGAAAGGAGTGATTGCGTGTTCAAAACTCTCAATAAATTTAAGGGTGTCCTTTCCTCACTGGACCACGAAGTTAGACATCAGTCCTTAGACGATGTGATCAAGAATTTTGATGAGAGGAATGAGACTATTGATTTTGAATTGAGTGAGGACACAATTCGAACATCATCAGTGCTAGATACAAAGTTTAGTGATTGGTGGGACCGACAAATCCAGATGGGACATACACTTCCACATTACAGAACCGAGGGGCACTTCATGGAATTCACAAGAGCAACTGCTGTCCAAGTGGCTAATGATATCGCCCATAGCGAACACCTAGACTTTCTAGTAAGGGGAGCTGTTGGGTCTGGAAAGTCAACTGGGTTGCCTGTTCATCTTAGTATAGCCGGATCTGTGCTTTTAATTGAACCAACGCGACCACTAGCGGAGAACGTTTTCAAACAGCTATCTAGTGAACCATTCTTCAAGAAGCCAACACTGCGTATGCGCGGAAATAGTATATTTGGCTCTTCTCCAATCTCCGTCATGACTAGCGGATTTGCGCTACACTACTTCGCCAATAATCGCTCTCAATTAGCTCAGTTCAACTTTGTGATATTTGATGAGTGCCATGTTCTGGATCCTTCCGCAATGGCGTTCCGCAGTCTGCTGAGTGTTTATCATCAAGCATGCAAAGTATTAAAAGTGTCAGCTACTCCAGTGGGAAGAGAGGTTGAATTTACAACACAGCAACCAGTCAAGTTAATAGTGGAGGACACACTGTCTTTCCAATCATTTGTTGATGCACAAGGTTCTAAAACTAATGCTGATGTTGTTCAGTTTGGTTCAAACGTACTTGTGTACGTGTCGAGCTACAATGAAGTTGACACCTTGGCTAAGCTCCTAACAGACAAGAATATGATGGTCACAAAGGTTGATGGCAGAACAATGAAGCACGGTTGCTTAGAAATTGTCACAAAAGGAACCAGTGCGAGACCACATTTTGTTGTAGCAACCAACATAATTGAGAATGGAGTGACTTTGGACATAGACGTGGTTGTAGATTTTGGGTTGAAAGTCTCACCGTTCTTGGACATTGACAATAGGAGCATTGCTTACAATAAGGTGAGTGTTAGCTATGGTGAGAGAATTCAAAGGCTGGGTCGTGTTGGACGCTTCAAGAAAGGAGTAGCATTGCGCATTGGACACACTGAGAAGGGAATTATTGAAATTCCAAGCATGATCGCTACAGAGGCGGCTCTTGCTTGCTTTGCATATAACTTGCCAGTGATGACAGGAGGCGTCTCAACTAGTCTGATTGGCAATTGTACTGTGCGCCAAGTTAAAACAATGCAGCAATTTGAATTGAGTCCCTTCTTTATCCAGAATTTCGTTGCCCACGATGGATCAATGCATCCTGTCATACATGACATTCTTAAAAAGTATAAACTTCGAGATTGTATGACACCTTTGTGCGATCAGTCTATACCATACAGGGCATCGAGCACTTGGTTATCGGTTAGTGAATATGAGCGACTTGGAGTGGCCTTAGAAATTCCAAAGCAAGTCAAAATTGCATTCCATATCAAAGAGATCCCTCCTAAGCTCCACGAAATGCTTTGGGAAACGGTTGTCAAGTACAAAGACGTTTGCTTATTTCCAAGCATT-CGAGCATCGTCCATCAGCAAAATCGCATACACATTGCGTACAGACCTCTTCGCCATCCCAAGAACTCTAATATTGGTGGAGAGACTGCTTGAAGAGGAGCGAGTGAAGCAGAGCCAATTCAGAAGTCTCATCGACGAAGGATGCTCAAGCATGTTTTCAATTGTCAACTTGACAAACACTCTCAGAGCTAGATATGCAAAAGATTACACCGCAGAGAATATACAAAAACTTGAGAAAGTGAGAAGTCAATTGAAAGAATTCTCAAATTTGGATGGTTCTGCATGTGAGGAAAATTTAATAAAGAGGTATGAGTCTTTGCAGTTCGTTCATCACCAAGCTGCGACGTCACTTGCAAAGGATCTCAAGTTGAAGGGGACTTGGAAGAAGTCATTAGTGGCCAAAGACTTGATCATAGCAGGCGCTGTTGCAATTGGTGGAATAGGACTCATATATAGTTGGTTCACACAATCAGTTGAGACTGTGTCTCACCAAGGGAAAAATAAATCCAAAAGAATTCAAGCCTTGAAGTTTCGCCATGCTCGTGACAAAAGGGCTGGCTTTGAAATTGACAACAATGATGACACAATAGAGGAATTCTTTGGATCTGCATACAGGAAGAAGGGAAAAGGTAAAGGCACCACTGTTGGTATGGGCAAGTCAAGCAGGAGGTTTGTTAATATGTATGGATTTGACCCAACAGAATATTCATTCATCCAGTTCGTCGATCCGCTCACTGGAGCTCAAATTGAAGAGAACGTCTATGCTGATATTAGAGACATCCAAGAGCGCTTTAGTGATGTCCGCAAGAAAATGGTAGAGGATGATGAAATCGAATTGCAAGCATTGGGCAGCAACACAACCATTCATGCTTACTTCAGGAAAGATTGGTCTGACAAGGCTCTAAAAATTGATTTGATGCCACACAACCCACTCAAAATCTGTGATAGATCGAATGGCATTGCCAAGTTTCCTGAAAGAGAACTTGAGTTGAGGCAAACTGGGCCAGCAATAGAGGTTGACGTGAAAGACATTCCAAAGCAGGAAGTGGAGCATGAAGCCAAATCACTCATGAGAGGTTTAAGGGATTTCAATCCAATTGCTCAAACAGTTTGCAGAGTAAAAGTGTCTGTTGAATATGGAACGTCTGAAATGTATGGGTTCGGTTTTGGTGCGTGTATTATAGTAAACCACCATCTATTCAAGAGTTTCAATGGATCCATGGAAGTGCGATCAATGCATGGAACATTCAGAGTGAAGAATTTGCATAGCTTGAGCGTTTTACCGATCAAAGGCAGAGACATTATCATCATAAAGATGCCAAAGGATTTCCCTGTTTTCCCACAAAAACTGCACTTCCGAGCTCCAGTGCAGAATGAGAGGATTTGTTTGGTTGGAACTAATTTTCAAGAAAAACATGCATCATCAATCATCACAGAAACGAGTACTACATACAATGTACCGGGCAGCACTTTTTGGAAGCATTGGATTGAAACAAATGATGGGCATTGTGGATTACCAGTAGTGAGTACAGCTGATGGATGTCTAGTTGGAATACATAGCTTGGCAAATAATGTGCAAACCACGAATTATTATTCAGCCTTTGATGAGGATTTTGAAAGTAAGTATCTCCGAACTAATGAGCATATTGAGTGGACCAAATCGTGGGTATATAACCCAGATACTGTGTTGTGGGGTCCATTGAAGCTCAAGGAGAGTACCCCTAAAGGCCTGTTTAAGACAACAAAACTTGTACAGGATTTAAT------TGATCATGATGTTGTTGTAGAGCAAGCTAAACATTCTGCGTGGATGTATGAGGCTCTAACAGGGAATTTGCAAGCTGTGGCGACAATGAAGAGTCAGCTGGTGACAAAGCACGTGGTCAAAGGGGAGTGTCGGCACTTCAAAGAGTTCTTAACTGTGGATTCGGAAGCAGAAGCT------TTCTTCAGGCCTTTGATGGATGCTTATGGAAAGAGCTTGTTAAATAGAGAAGCATATATAAAGGACATAATGAAATACTCAAAGCCTATTGATGTTGGAATAGTGGACTGTGAT--GCTTTTGAAGAGGCTATCAATAGGGTTATCATTTATCTGCAA-GTGCATGGCTTCCAGAAATGCAATTACATCACCGATGAGCAGGAAATTTTCAAAGCTCTCAATATGAAAGCTGCAGTCGGAGCTATGTATGGAGGCAAGAAGAAAGACTACTTCGAGCATTTTACTGAGGCGGATAAAGAGGAAATTGTTATGCAAAGTTGCCTTCGATTGTACAAGGGCTCGCTTGGCATATGGAATGGATCATTGAAAGCAGAACTTCGGTGCAAAGAGAAGATACTTGCAAATAAGACAAGGACATTCACTGCCGCACCTTTAGATACTCTGCTTGGTGGAAAGGTGTGCGTTGATGATTTTAATAATCAATTCTACTCGAAGAACATTGAATGCTGCTGGACTGTTGGAATGACTAAGTTTTATGGAGGTTGGGACAAATTGCTTCGGCGTCTACCTGAAAATT---GGGTGTACTGCGATGCCGATGGTTCACAATTCGATAGTTCACTCACCCCATACCTAATCAATGCTGTTCTCATCATCAGAAGCACATACATGGAAGATTGGGACTTGGGGTCGCAAATGTTGCGCAATTTGTACACAGAAATAATTTACACACCAATCTCAACTCCAGATGGAACAATTGTCAAGAAGTTTAGACGTAATAATAGCGGTCAACCTTCTACCGTTGTGGATAATTCTCTCATGGTTGTCCTTGCTATGCATTACGCTCTCATTAAGGAGTGCGTTGAGTTTGAAGAAATCGACAGCACGTGTGTATTCTTTGTTAATGGTGATGACTTATTGATTGCTGTGAATCCGGAGAAAGAGAGCATTCTCGATAGAATGTCACAACATTTCTCAGATCTTGGTTTGAACTATGATTTTTCGTCGAGAACAAGAAGGAAGGAGGAATTGTGGTTCATGTCCCATAGAGGCCTGCTAATCGAGGGTATGTACGTACCAAAGCTTGAAGAAGAGAGAATTGTATCCATTTTGCAATGGGATAGAGCTGATCTGCCAGAGCACAGATTAGAAGCGATTTGTGCAGCAATGATTGAATCCTGGGGTTATTTTGAGTTAACGCACCAAATCAGGAGGTTCTACTCATGGTTGTTGCAACAGCAACCTTTTTCAACGATAGCACAGGAAGGAAAAGCTCCATACATAGCGAGCATGGCATTGAAGAAGCTGTACATGAATAGGACAGTAGATGAGGAGGAACTGAAGGCTTTCACTGAAATGATG?GTTGCCTTGGATGATGAATTTGAGTGCGATACTTATGAAGCGCACCATCAAGGAAAT---------GACACAATCGATGCAGGAGGAAGCACTAAGAAGGATGCAAAACAAGAGCAAGGTAGCATTCAACCAAATCTCAACAAGGAAAAG---------------------------GAAAAGGACGTGAATGTTGGAACATCTGGAACTCATACTGTGCCACGAATTAAAGCTATCACGTCCAAAATGAGAATGCCCAAGAGTAAAGGTGCAACTGTACTAAATTTGGAACACTTACTCGAGTATGCTCCACAGCAAATTGACATCTCAAATACTCGAGCAACTCAATCACAGTTTGATACGTGGTATGAAGCGGTACAACTTGCATACGACATAGGAGAAACTGAAATGCCAACTGTGATGAATGGGCTTATGGTTTGGTGCATTGAAAATGGAACCTCGCCAAACATCAACGGAGTTTGGGTTATGATGGATGGAGATGAACAAGTCGAATACCCACTGAAACCAATCGTTGAGAATGCAAAACCAACACTTAGGCAAATCATGGCACATTTCTCAGATGTTGCAGAAGCGTATATAGAAATGCGCAACAAAAAGGAACCATATATGCCACGATATGGTTTAGTTCGTAATCTGCGCGATGGAAGTTTGGCTCGCTATGCTTTTGACTTTTATGAGGTCACATCACGAACACCAGTGAGGGCTAGGGAAGCGCACATTCAAATGAAGGCCGCAGCATTGAAATCAGCCCAACCTCGACTTTTCGGGTTGGACGGTGGCATCAGTACACAAGAGGAGAACACAGAGAGGCACACCACCGAGGATGTCTCTCCAAGTATGCATACTCTACTTGGAGTCAAGAACATGTGAT?GTAGTGTCTCTCCGGACGATATATAAGTATTTACA-TATGCAGTAAGTATTTTGGCTTTTCCTGTACTACTTTTATCATAATTAATAATCAGTTTGAATATTACTAATAGATAGAGGTGGCAGGGTGATTTCGTCATTGT-GGTGACTCTATCTTTTAATTCCGCATTATT-------------------------------------------------------------------------------------------------------------------------------------------------------------------------------------------------------------------------------------GAATCTTAGATAAAAGTGCCGGGTTGTCGTTGTTGTGGATGATTCATCGATTAGGTGATGTTGCGATTCTGTCGTAGCAGTGACTATGTCTGGATCTATCTG-CTTGGGTGGTGTTGTGATTTCGTCATAACAGTGACTGTAAACTTCAATCAGGAGA?
	Z26          ???????????????????????????????????????????????????????????????????????????????????????????????????????????????????????????????????????????????????????????????????????????????????????????????????????????????????????????????????TTGATGCAAACTTCCATACTCACCCGCTCCTTTTGGGCTAGTTGCGGGGAAACGAGAAGTTTCAACC-------------------------------------------------------------------------------------------------------------------------------------------------------------------------------------------------------------------------------------------------------------------------------------------------------------------------------------------------------------------------------------------------------------------------------------------------------------------------------------------------------------------------------------------------------------------------------------------------------------------------------------------------------------------------------------------------------------------ACCACTGACCCCTTCGCAAGTTTGGAGATGCAGCTTAGTGCGCGATTACGAAGGCAAGAGTTTGCAACTATTCGAACATCCAAGAATGGTACTTGCATGTATCGATACAAGACTGATGTCCAGATTGCGCGCATTCAAAAGAAGCGCGAGGAGAGAGAAAGAGAGGAATATAATTTCCAAATGGCTGCGTCAAGTGTTGTGTCGAAGATCACTATTGCTGGTGGAGAGCCACCTTCAAAACTTGAATCACAAGTGCGGAGGGGTGTCATCCACACAACTCCAAGGATGCGCACAGCAAAAACATATCACACGCCAAAGTTGACAGAGGGACAAATGAACCACCTTATCAAGCAGGTGAAGCAAATTATGTCAACCAAAGGAGGGTCTGTTCAACTGATTAGCAAGAAAAGTACCCATGTTCACTATAAAGAAGTTTTGGGATCACATCGCGCAGTTGTTTGCACTGCA?CACATGAGAGGTTTACGAAAGAGAGTGGACTTTCGGTGTGATAAATGGACCGTTGTGCGTCTACAGCATCTCGCCAGGACGGACAAGTGGACTAACCAAGTTCGTGCTACTGATCTACGCAAGGGCGATAGTGGAGTTATATTGAGTAATACTAATCTCAAAGGAAACTTTGGAAGAAGCTCGGAGGGCCTATTCATAGTGCGTGGGTCGCACGAAGGAAAAATCTATGATGCACGTTCCAAGGTTACTCAAGGGGTTATGGATTCAATGGTTCAGTTCTCAAGCGCTGAAAGCTTTTGGAAGGGATTGGACGGCACTTGGGCACAAATGAGATATCCTACAGATCATACATGTGTGGCAGGCTTACCAGTTGAGGACTGTGGCAGAGTTGCAGCGATAATGACACACAGTATTTTACCGTGCTATAAGATAACCTGCCCTACCTGTGCCCAACAATATGCCAACTTGCCAGCCAGTGACTTACTTAAGATATTACACAAGCACGCAAGTGATGGTTTAAATCGATTGGGGGCAGACAAAGATCGCTTTGTGCATGTCAAAAAGTTCTTGACAATCTTAGAGCACTTAACTGAACCAGTTGATCTGAGTCTAGAAATTTTCAATGAAGTATTCAAGTCTATAGGGGAGAAGCAACAATCACCTTTCAAAAACCTGAATATTCTGAATAATTTCTTTTTGAAAGGGAAGGAAAATACAGCTCGTGAATGGCAGGTGGCTCAATTAAGCTTACTTGAATTGGCAAGATTCCAAAAGAACAGAACGGATAATATCAAGAAAGGAGACATCTCGTTCTTTAGGAATAAACTATCTGCCAAAGCAAATTGGAACTTGTATCTGTCATGTGATAACCAGCTGGATAAGAATGCAAACTTCCTGTGGGGACAGAGAGAATATCATGCTAAGCGATTTTTCTCGAACTATTTCGAGGAAATTGATCCAGCGAAGGGCTATTCAGCATACGAAAATCGTTTGCATCCGAATGGGACAAGAAAACTTGCAATTGGAAACCTAATTGTACCACTTGATCTGGCTGAGTTTAGGCGGAAGATGAAAGGTGATTATAAAAGACAGCCAGGGGTGAGTAAGAAGTGCACGAGCTCGAAGGATGGAAACTACGTGTATCCCTGTTGTTGCACTACACTTGATGATGGCTCAGCTGTTGAATCAACATTTTACCCGCCAACTAAGAAGCACCTCGTAATAGGTAATAGTGGCGATCAAAAGTATGTTGACTTACCAAAAGGGAATTCTGAGATGTTATATATCGCCAGGCAAGGTTTCTGTTACATTAACATTTTCCTCGCGATGTTGATTAACATTAGTGAGGAAGATGCAAAGGATTTCACTAAGAAGGTTCGTGACATGTGTGTGCCAAAGCTTGGAACCTGGCCAACCATGATGGATCTGGCTACAACTTGTGCTCAAATGAAAATATTCTACCCTGATGTTCATGATGCAGAACTGCCTAGAATACTAGTCGATCACGAAACGCAGACATGCCATGTGGTTGACTCGTTTGGCTCACAAACAACTGGGTATCATATTTTGAAAGCATCTAGCGTGTCCCAACTTATTTTGTTTGCTAATGATGAGTTGGAGTCTGACATTAAGCACTATAGAGTTGGTGGTATTCCTAATGCATGCCCTGAACTTGGGTCTACAAT-ATCACCTTTCAGAGAAGGAGGAGTTATAATGTCTGAGTCGGCAGCGCTGAAACTGCTTTTGAAGGGAATTTTTAGACCTAAGGTGATGAGACAGTTGCTGTTAGATGAGCCTTACCTGTTGATTCTATCAATATTATCCCCTGGCATACTGATGGCTATGTACAATAATGGGATTTTTGAACTTGCGGTAAGGTTGTGGATTAATGAGAAACAATCCATAGCTATGATAGCATCGCTACTATCAGCTTTAGCCCTACGAGTGTCAGCGGCAGAAACACTCGTCGCACAGAGGATTATAATTGATACTGCAGCCACAGATCTCCTTGATGCTACGTGCGATGGGTTCAACCTACATCTAACGTACCCCACTGCGTTGATGGTGTTGCAAGTTGTTAAGAATAGAAATGAATGTGATGATACCCTATTCAAGGCGGGTTTTCCAAGTTACAACACGAGCGTCGTACAGATCATGGAAAAAAATTATCTAAATCTCTTGAACGATGCTTGGAAAGATTTAACTTGGCGGGAAAAATTATCCGCAACATGGTACTCATACAGAGCAAAACGCTCTATCACTCGGTACATAAAACCCACAGGAAGGGCAGATTTGAAAGGGTTATACAACATATCACCACAAGCATTCTTGGGCCGAGGCGCCCAGGTGGTCAAAGGCACTGCCTCAGGATTGAGCGAGCGATTTAATAATTATTTCAATACTAAGTGTGTGAATATTTCATCCTTTTTCATTCGTAGAATCTTTAGGCGTTTGCCAACTTTCGTCACTTTTGTTAACTCATTATTAGTTATTAGTATGTTAACCAGCGTAGTGGCAGTGTGTCAGGCAATAATTTTAGATCAGAGGAAGTATAGGAGAGAAATTGAGTTGATGCAGATAGAGAAGAATGAGATCGTCTGCATGGAGCTATATGCAAGTTTACAGCGCAAACTTGAACGCGATTTCACATGGGATGAGTACATTGAGTATTTGAAGTCAGTAAACCCTCAGATAGTTCAGTTTGCTCAAGCGCAGATGGAAGAATATGATGTGCGACACCAGCGTTCCACACCAGGTGTTAAAAATTTGGAACAAGTGGTAGCATTTATGGCTTTAGTCATCATGGTGTTCGATGCTGAAAGGAGTGATTGCGTGTTCAAAACTCTCAATAAATTTAAGGGTGTCCTTTCCTCACTGGACCATGAAGTTAGACATCAGTCCTTAGACGATGTGATCAAGAATTTTGATGAGAGGAATGAGACTATTGATTTTGAATTGAGTGAGGACACAATTCGAACATCATCAGTGCTAGATACAAAGTTTAGTGATTGGTGGGACCGACAAATCCAGATGGGACATACACTTCCACATTACAGAACCGAGGGGCACTTCATGGAATTCACAAGAGCAACTGCTGTCCAAGTGGCTAATGATATCGCCCACAGCGAACACCTAGACTTTCTAGTAGGGGGAGCTGTTGGGTCTGGAAAGTCAACTGGGTTGCCTGTTCATTTTAGTGTAGCCGGATCTGTGTTTTTATTTGAACCAACGCGCCCCCTAGCGGAAAACTTTTTCAAACAGCTATCTAGTGAACCATTCTTCAAAAAGCCAACACTGCGTATGCGTGGAAATAGTATTTTTGGCTCTTCCCCATTCTCCGTCATGACTAGCGGATTTGCCCTCCACTACTTCCCCAATAATCGCTCTCAATTAGCTCACTTCAACTTTGTGATATTTGATGAGTGCCATGTTCTGGATCCTTCCGCAGTGGCTTTCCGCATTCTGCTGAGTGTTTATCATCAAGCATGCAAAGTATTAAAAGTGTCACCTACTCCAGGGGGAAGAGAGGTTGATTTTACAACACACCACCCAGTCAAGTTAATAGTGGAGGACACACTGTCTTTCCAATCATTTGTTGATGCACAAGGTTCTAAAACTAATGCTGATGTTGTTCATTTGGGTTCAAACGTACTTGTGTACTTGTCGAGCTACATTGAATTTAACACCTGGGCTAAGCTCCTAACAGACAAGAATATGATGGTCACAAAGGTTGATGGCAGAACAATGAAGCACGGTTGCCTAGAAATTGTCACAAAAGGAACCAGTGCGAGACCACATTTTGTTGTAGCAACCAACATAATTGAGAATGGAGTGACTTTGGACATAGACGTGGTTGTAGATTTTGGGTTGAAAGTCTCACCGTTCTTGGACATTGACAATAGGAGCATTGCTTACAATAAGGTGAGTGTTAGCTATGGTGAGAGAATTCAAAGGCTGGGTCGTGTTGGACGCTTCAAGAAAGGAGTAGCATTGCGCATTGGACACACTGAGAAGGGAATTATTGAAATTCCAAGCATGATCGCTACAGAGGCGGCTCTTGCTTGCTTTGCATATAACTTGCCAGTGATGACAGGAGGCGTCTCAACTAGCCTGATTGGCAATTGTACTGTGCGCCAAGTTAAAACAATGCAGCAATTTGAATTGAGTCCCTTCTTTATCCAGAATTTCGTTGCCCACGATGGATCAATGCATCCTGTCATACATGACATTCTTAAAAAGTATAAACTTCGAGATTGTATGACACCTTTGTGCGATCAGTCTATACCATACAGGGCATCGAGCACTTGGTTATCGGTTAGTGAATATGAGCGACTTGGAGTGGCCTTAGAAATTCCAAAGCAAGTCAAAATTGCATTCCATATCAAAGAGATCCCTCCTAAGCTCCACGAAATGCTTTGGGAAACGGTTGTCAAGTACAAAGACGTTTGCTTATTTCCAAGCATT-CGAGCATCGTCCATCAGCAAAATCGCATACACATTGCGTACAGACCTCTTCGCCATCCCAAGAACTCTAATATTGGTGGAGAGACTGCTTGAAGAGGAGCGAGTGAAGCAGAGCCAATTCAGAAGTCTCATCGACGAAGGATGCTCAAGCATGTTTTCAATTGTCAACTTGACAAACACTCTCAGAGCTAGATATGCAAAAGATTACACCGCAGAGAATATACAAAAACTTGAGAAAGTGAGAAGTCAATTGAAAGAATTCTCAAATTTGGATGGTTCTGCATGTGAGGAAAATTTAATAAAGAGGTATGAGTCTTTGCAGTTCGTTCATCACCAAGTTGCGACGTCACTTGCAAAGGATCTCAAGTTGAAGGGGACTTGGAAGAAGTCATTAGTGGCCAAAGATTTGATCATAGCAGGCGCTGTTGCAATTGGTGGAATAGGACTCATATATAGTTGGTTCACACAATCAGTTGAGACTGTGTCTCACCAAGGGAAAAATAAATCCAAAAGAATTCAAGCCTTGAAGTTTCGCCATGCTCGTGACAAAAGGGCTGGCTTTGAAATTGACAACAATGATGACACAATAGAGGAATTCTTTGGATCTGCATACAGGAAGAAGGGAAAAGGTAAAGGCACCACTGTTGGTATGGGCAAGTCAAGCAGGAGGTTTGTTAATATGTATGGATTTGACCCAACAGAATATTCATTCATCCAGTTCGTTGATCCGCTCACTGGAGCTCAAATTGAAAAGAACGTCTATGCTGATATTAGAGACATCCAAAAGCGCTTTAGTGATGTCCGCAAGAAAATGGTAGAGGATGATGAAATCGAATTGCAAGCATTGGGCAGCAACACAACCATTCATGCTTACTTCAGGAAAGATTGGTCTGACAAGGCTCTAAAAATTGATTTGATGCCACACAACCCACTCAAAATCTGTGATAAATCGAATGGCATTGCTAAGTTTCCTGAAAGAGAACTTGAGTTGAGACAAACTGGGCCAGCAATAGAGGTTGATGTGAAAGACATTCCAAAACAGGAAGTGGAGCATGAAGCCAAATCACTCATGAGAGGTTTAAGGGATTTCAATCCAATTGCTCAAACAGTTTGCAGAGTAAAAGTGTCTGTTGAATATGGAACGTCTGAAATGTATGGGTTCGGTTTTGGTGCGTATATTATAGTAAACCACCATCTATTCAAGAGTTTCAATGGATCCATGGAAGTGCGATCAATGCATGGAACATTCAGAGTGAAGAATTTGCATAGCTTGAGCGTTTTACCGATCAAAAGCAGAGACATTATCATCATAAAGAAAACAAAAGATTTCCCTGTTTTCCCACAAAAACTGCACTTCCGAGCTGCAGTGCAGAATGAGAGGATTTGTTTGGTTGGAACTAATTTTCAAGAAAAACATGCATCATCAATCATCACAGAAACGAGTACTACATACAATGTACCGGGCAGCACTTTTTGGAAGCATTGGATTGAAACAAATGATGGGCATTGTGGATTACCAGTAGTGAGTACAGCTGATGGATGTCTAGTTGGAATACACAGCTTGGCGAATAATGTGCAAACCACGAATTATTATTCAGCCTTTGATGAGGATTTTGAAAGTAAGTATCTCCGAACTAATGAGCATAATGAGTGGACCAAATCGTGGGTTTATAACCCAGATACTGTGTTGTGGGGTCCATTGAAGCTCAAGGAGAGTACCCCTAAAGGCCTGTTTAAGACAACAAAACTTGTACAGGATTTA?T------TGATCATGATGTTGTTGTAGAGCAAGCTAAACATTCTGCGTGGATGTATGAGGCTCTAACAGGGAATTTGCAAGCTGTGGCGACAATGAAGAGTCAGCTGGTGACAAAGCACGTGGTCAAAGGGGAGTGTCGGCACTTCAAAGAGTTCTTAACTGTGGATTCGGAAGCAGAAGCT------TTCTTCAGGCCTTTGATGGATGCTTATGGGAAGAGCTTGTTAAATAGAGAAGCATATATAAAGGACATAATGAAATACTCAAAGCCTATTGATGTTGGAACAGTAGACTGTGAT--GCTTTTGAAGAGGCTATCAATAGGGTTATCATTTATCTGCAA-GTGCATGGCTTCCAGAAATGCAATTACATCACCGATGAGCAGGAAATTTTCAAAGCTCTCAATATGAAAGCTGCTGTCGGAGCTATGTATGGAGGCAAGAAGAAAGACTACTTTGAGCATTTTACTGAGGCGGATAAAGAGGAAATTTTTATGCAAAGTTGCCTTCGATTGTACAAGGGCTCGCTTGGCATATGGAATGGATCGTTGAAAGCAGAACTTCGGTGCAAAGAGAAGATACTTGCAAATAAGACAAGGACATTCACTGCTGCACCTTTAGATACTCTACTGGGTGGAAAGGTGTGCGTTGATGATTTTAATAATCAATTCTACTCGAAGAACATTGAATGCTGCTGGACTGTTGGAATGACTAAGTTTTATGGAGGTTGGGACAAATTGCTTCGGCGTCTACCTGAAAATT---GGGTGTACTGCGATGCCGATGGTTCACAATTCGATAGTTCACTCACCCCATACCTAATTAATGCTGTTCTCATCATCAGAAGCACATACATGGAAGATTGGGACTTGGGGTTGCAAATGTTGCGCAATTTGTACACAGAAATAATTTACACACCAATCTCAACTCCAGATGGAACAATTGTCAAGAAGTTTAGAGGTAATAATAGCGGTCAACCTTCTACCGTTGTGGATAATTCTCTCATGGTTGTCCTTGCTATGCATTACGCTCTCATTAAGGAGTGCGTTGAGTTTGAAGAAATCGACAGCACGTGTGTATTCTTTGTTAATGGTGATGACTTATTGATTGCTGTGAATCCGGAGAAAGAGAGCATTCTCGATAGAATGTCACAACATTTCTCAGATCTTGGTTTGAACTATGATTTTTCGTCGAGAACAAGAAGGAAGGAGGAATTGTGGTTCATGTCCCATAGAGGCCTGCTAATCGAGGGTATGTACGTGCCAAAGCTTGAAGAAGAGAGAATTGTATCCATTTTGCAATGGGATAGAGCTGATCTGCCAGAACACAGATTAGAAGCGATTTGTGCAGCAATGATAGAATCCTGGGGTTATTTTGAGTTAACGCACCAAATCAGGAGATTCTACTCATGGTTGTTGCAACAGCAACCTTTTTCAACGATAGCACAGGAAGGAAAAGCTCCATACATAGCGAGCATGGCATTGAAGAAGCTGTACATGGATAGGACAGTAGATGAGGAGGAACTGAAGGCTTTCACTGAAATGATG?GTTGCCTTGGATGATGAACTTGAGTGCGATACTTATGAAGTGCACCATcaaGGAAAT---------GACACAATCGATGCAGGAGGAAGCACTAAGAAGGATGCAAAACAAGAGCAAGGTAGCATTCAACCAAATCTCAACAAGGAAAAG---------------------------GAAAAGGACGTGAATGTTGGAACATCTGGAACTCATACTGTGCCACGAATTAAAGCTATCACGTCCAAAATGAGAATGCCCAAGAGCAAAGGTGCAACTGTACTAAATTTGGAACACTTACTCGAGTATGCTCCACAGCAAATTGACATCTCAAATACTCGAGCAACTCAATCACAGTTTGATACGTGGTATGAAGCGGTACAACTTGCATACGACATAGGAGAAACTGAAATGCCAACTGTGATGAATGGGCTTATGGTTTGGTGCATTGAAAATGGAACCTCGCCAAACATCAACGGAGTTTGGGTTATGATGGATGGAGATGAACAAGTCGAATACCCACTGAAACCAATCGTTGAGAATGCAAAACCAACACTTAGGCAAATCATGGCACATTTCTCAGATGTTGCAGAAGCGTATATAGAAATGCGCAACAAAAAGGAACCATATATGCCACGATATGGTTTAGTTCGTAATCTGCGCGATGGAAGTTTGGCTCGCTATGCTTTTGACTTTTATGAGGTCACATCACGAACACCAGTGAGGGCTAGGGAAGCGCACATTCAAATGAAGGCCGCAGCATTGAAATCAGCCCAACCTCGACTTTTCGGGTTGGACGGTGGCATCAGTACACAAGAGGAGAACACAGAGAGGCACACCACCGAGGATGTCTCTCCAAGTATGCATACTCTACTTGGAGTCAAGAACATGTGATTGTAGTGTCTCTCCGGACGATATATAAGTATTTACA-TATGCAGTAAGTATTTTGGCTTTTCCTGTACTACTTTTATCATAATTAATAATCAGTTTGAATATTACTAATAGATAGAGGTGGCAGGGTGATTTCGTCATTGT-GGTGACTCTATCTTTTAATTCCGCATTATT-------------------------------------------------------------------------------------------------------------------------------------------------------------------------------------------------------------------------------------AAGTCTTAGATAAAAGTGCCGGGTTGTCGTTGTTGTGGATGATTCATCGATTAGGTGATGTTGCGATTCTGTCGTA???????????????????????????????????????????????????????????????????????????????????
	CC9_12       ???????????????????????????????????????????????????????????????????????????????????????????????????????????????????????????????????????????????????????????????????????????????????????????????????????????????????????????????????TTGATGCAAACTTCCATACTCACCCGCTCCTTTTGGGCTAGTTGCGGGGAAACGAGAAGTTTCAACC-------------------------------------------------------------------------------------------------------------------------------------------------------------------------------------------------------------------------------------------------------------------------------------------------------------------------------------------------------------------------------------------------------------------------------------------------------------------------------------------------------------------------------------------------------------------------------------------------------------------------------------------------------------------------------------------------------------------ACCACTGACCCCTTCGCAAGTTTGGAGATGCAGCTTAGTGCGCGATTACGAAGGCAAGAGTTTGCAACTATTCGAACATCCAAGAATGGTACTTGCATGTATCGATACAAGACTGATGTCCAGATTGCGCGCATTCAAAAGAAGCGCGAGGAGAGAGAAAGAGAGGAATATAATTTCCAAATGGCTGCGTCAAGTGTTGTGTCAAAGATCACTATTGCTGGTGGAGAGCCACCTTCAAAACTTGAATCACAAGTGCGGAGGGGTGTCATCCACACAACTCCAAGGATGCGCACAGCAAAAACATATCACACGCCAAAGTTGACAGAGGGACAAATGAACCACCTTATCAAGCAGGTGAAGCAAATTATGTCAACCAAAGGAGGGTCTGTTCAACTGATTAGCAAGAAAAGTACCCATGTTCACTATAAAGAAGTTTTGGGATCACATCGCGCAGTTGTTTGCACTGCA?CACATGAGAGGTTTACGAAAGAGAGTGGACTTTCGGTGTGATAAATGGACCGTTGTGCGTCTACAGCATCTCGCCAGGACGGACAAGTGGACTAACCAAGTTCGTGCTACTGATCTACGCAAGGGCGATAGTGGAGTTATATTGAGTAATACTAATCTCAAAGGAAACTTTGGAAGAAGCTCGGAGGGCCTATTCATAGTGCGTGGGTCGCACGAAGGAAAAATCTATGATGCACGTTCCAAGGTTACTCAAGGGGTTATGGATTCAATGGTTCAGTTCTCAAGCGCTGAAAGCTTTTGGAAGGGATTGGACGGCAATTGGGCACAAATGAGATATCCTACAGATCATACATGTGTGGCAGGCTTACCAGTTGAGGACTGTGGCAGAGTTGCAGCGATAATGACACACAGTATTTTACCGTGCTATAAGATAACCTGCCCTACCTGTGCCCAACAATATGCCAACTTGCCAGCCAGTGACTTACTTAAGATATTACACAAGCACGCAAGTGATGGTTTAAATCGATTGGGGGCAGACAAAGATCGCTTTGTGCATGTCAAAAAGTTCTTGACAATCTTAGAGCACTTAACTGAACCGGTTGATCTGAGTCTAGAAATTTTCAATGAAGTATTCAAGTCTATAGGGGAGAAGCAACAATCACCTTTCAAAAACCTGAATATTCTGAATAATTTCTTTTTGAAAGGAAAGGAAAATACAGCTCGTGAATGGCAGGTGGCTCAATTAAGCTTACTTGAATTGGCAAGATTCCAAAAGAACAGAACGGATAATATCAAGAAAGGAGACATCTCGTTCTTTAGGAATAAACTATCTGCCAAAGCAAATTGGAACTTGTATCTGTCATGTGATAACCAGCTGGATAAGAATGCAAACTTCCTGTGGGGACAGAGAGAATATCATGCTAAGCGATTTTTCTCGAACTATTTCGAGGAAATTAATCCAGCGAAGGGCTATTCAGCATACGAAAATCGTTTGCACCCGAATGGGACAAGAAAACTTGCAATTGGAAACCTAATTGTACCACTTGATCTGGCTGAGTTTAGGCGGAAGATGAAAGGTGATTATAAAAGACAGCCAGGGGTGAGTAAGAAGTGCACGAGCTCGAAGGATGGAAACTACGTGTATCCCTGTTGTTGCACTACACTTGATGATGGCTCAGCTGTTGAATCAACATTTTACCCGCCAACTAAGAAGCACCTCGTAATAGGTAATAGTGGCGATCAAAAGTATGTTGACTTACCAAAAGGGAATTCTGAGATGTTATATATTGCCAGGCAAGGTTTCTGTTACATTAACATTTTCCTCGCGATGTTGATTAACATTAGTGAGGAAGATGCAAAGGATTTCACTAAGAAGGTTCGTGACATGTGTGTGCCAAAGCTTGGAACCTGGCCAACCATGATGGATCTGGCTACAACTTGTGCTCAAATGAAAATATTCTACCCTGATGTTCATGATGCAGAACTGCCTAGAATACTAGTCGATCACCAAACGCAGACATGCCATGTGGTTGACTCGTTTGGCTCACAAACAACTGGGTATCATATTTTGAAAGCATCTAGCGTGTCCCAACTTATTTTGTTTGCTAATGATGAGTTGGAGTCTGACATTAAGCACTATAGAGTTGGTGGTATTCCTAATGCATGCCCTGAACTTGGGTCTACAAT-ATCACCTTTCAGAGAAGGAGGAGTTATAATGTCTGAGTCGGCAGCGCTGAAACTGCTTTTGAAGGGAATTTTTAGACCTAAGGTGATGAGACAGTTGCTGTTAGATGAGCCTTACCTGTTGATTCTATCAATATTATCCCCTGGCATACTGATGGCTATGTACAATAATGGGATTTTTGAACTTGCGGTAAGGTTGTGGATTAATGAGAAACAATCCATAGCTATGATAGCATCGCTACTATCAGCTTTAGCCCTACGAGTGTCAGCGGCAGAAACACTCGTCGCACAGAGGATTATAATTGATACTGCAGCCACAGATCTCCTTGATGCTACGTGCGATGGGTTCAACCTACATCTAACGTACCCCACTGCGTTGATGGTGTTGCAAGTTGTTAAGAATAGAAATGAATGTGATGATACCCTATTCAAGGCGGGTTTTCCAAGTTACAACACGAGCGTCGTACAGATCATGGAAAAAAATTATCTAAATCTCTTGAACGATGCTTGGAAAGATTTAACTTGGCGGGAAAAATTATCCGCAACATGGTACTCATACAGAGCAAAACGCTCTATCACTCGGTACATAAAACCCACAGGAAGGGCAGATTTGAAAGGGTTATACAACATATCACCACAAGCATTCTTGGGCCGAGGCGCCCAGGTGGTCAAAGGCACTGCCTCAGGATTGAGCGAGCGATTTAATAATTATTTCAATACTAAGTGTGTGAATATTTCATCCTTTTTCATTCGTAGAATCTTTAGGCGTTTGCCAACTTTCGTCACTTTTGTTAACTCATTATTAGTTATTAGTATGTTAACCAGCGTAGTGGCAGTGTGTCAGGCAATAATTTTAGATCAGAGGAAGTATAGGAGAGAAATTGAGTTGATGCAGATAGAGAAGAATGAGATCGTCTGCATGGAGCTATATGCAAGTTTACAGCGCAAACTTGAACGCGATTTCACATGGGATGAGTACATTGAGTATTTGAAGTCAGTAAACCCTCAGATAGTTCAGTTTGCTCAAGCGCAGATGGAAGAATATGATGTGCGACACCAGCGTTCCACACCAGGTGTTAAAAATTTGGAACAAGTGGTAGCATTTATGGCTTTAGTCATCATGGTGTTCGATGCTGAAAGGAGTGATTGCGTGTTCAAAACTCTCAATAAATTTAAGGGTGTCCTTTCCTCACTGGACCATGAAGTTAGACATCAGTCCTTAGACGATGTGATCAAGAATTTTGATGAGAGGAATGAGACTATTGATTTTGAATTGAGTGAGGACACAATTCGAACATCATCAGTGCTAGATACAAAGTTTAGTGATTGGTGGGACCGACAAATCCAGATGGGACATACACTTCCACATTACAGAACCGAGGGGCACTTCATGGAATTCACAAGAGCAACTGCTGTCCAAGTGGCTAATGATATCGCCCACAGCGAACACCTAGACTTTCTAGTAGGGGGAGCTGTTGGGTCTGGAAAGTCAACTGGGTTGCCTGTTCATTTTAGTGTAGCCGGATCTGTGTTTTTATTTGAACCAACGCGCCCCCTAGCGGAAAACTTTTTCAAACAGCTATCTAGTGAACCATTCTTCAAAAAGCCAACACTGCGTATGCGTGGAAATAGTATTTTTGGCTCTTCCCCATTCTCCGTCATGACTAGCGGATTTGCCCTCCACTACTTCCCCAATAATCGCTCTCAATTAGCTCACTTCAACTTTGTGATATTTGATGAGTGCCATGTTCTGGATCCTTCCGCAGTGGCTTTCCGCATTCTGCTGAGTGTTTATCATCAAGCATGCAAAGTATTAAAAGTGTCACCTACTCCAGGGGGAAGAGAGGTTGATTTTACAACACACCACCCAGTCAAGTTAATAGTGGAGGACACACTGTCTTTCCAATCATTTGTTGATGCACAAGGTTCTAAAACTAATGCTGATGTTGTTCATTTGGGTTCAAACGTACTTGTGTACTTGTCGAGCTACATTGAATTTAACACCTGGGCTAAGCTCCTAACAGACAAGAATATGATGGTCACAAAGGTTGATGGCAGAACAATGAAGCACGGTTGCCTAGAAATTGTCACAAAAGGAACCAGTGCGAGACCACATTTTGTTGTAGCAACCAACATAATTGAGAATGGAGTGACTTTGGACATAGACGTGGTTGTAGATTTTGGGTTGAAAGTCTCACCGTTCTTGGACATTGACAATAGGAGCATTGCTTACAATAAGGTGAGTGTTAGCTATGGTGAGAGAATTCAAAGGCTGGGTCGTGTTGGACGCTTCAAGAAAGGAGTAGCATTGCGCATTGGACACACTGAGAAGGGAATTATTGAAATTCCAAGCATGATCGCTACAGAGGCGGCTCTTGCTTGCTTTGCATATAACTTGCCAGTGATGACAGGAGGCGTCTCAACTAGTCTGATTGGCAATTGTACTGTGCGCCAAGTTAAAACAATGCAGCAATTTGAATTGAGTCCCTTCTTTATCCAGAATTTCGTTGCCCACGATGGATCAATGCATCCTGTCATACATGACATTCTTAAAAAGTATAAACTTCGAGATTGTATGACACCTTTGTGCGATCAGTCTATACCATACAGGGCATCGAGCACTTGGTTATCGGTTAGTGAATATGAGCGACTTGGAGTGGCCTTAGAAATTCCAAAGCAAGTCAAAATTGCATTCCATATCAAAGAGATCCCTCCTAAGCTCCACGAAATGCTTTGGGAAACGGTTGTCAAGTACAAAGACGTTTGCTTATTTCCAAGCATT-CGAGCATCGTCCATCAGCAAAATCGCATACACATTGCGTACAGACCTCTTCGCCATCCCAAGAACTCTAATATTGGTGGAGAGACTGCTTGAAGAGGAGCGAGTGAAGCAGAGCCAATTCAGAAGTCTCATCGACCAAGGATGCTCAAGCATGTTTTCAATTGTCAACTTGACAAACACTCTCAGAGCTAGATATGCAAAAGATTACACCGCAGAGAATATACAAAAACTTGAGAAAGTGAGAAGTCAATTGAAAGAATTCTCAAATTTGGATGGTTCTGCATGTGAGGAAAATTTAATAAAGAGGTATGAGTCTTTGCAGTTCGTTCATCACCAAGTTGCGACGTCACTTGCAAAGGATCTCAAGTTGAAGGGGACTTGGAAGAAGTCATTAGTGGCCAAAGATTTGATCATAGCAGGCGCTGTTGCAATTGGTGGAATAGGACTCATATATAGTTGGTTCACACAATCAGTTGAGACTGTGTCTCACCAAGGGAAAAATAAATCCAAAAGAATTCAAGCCTTGAAGTTTCGCCATGCTCGTGACAAAAGGGCTGGCTTTGAAATTGACAACAATGATGACACAATAGAGGAATTCTTTGGATCTGCATACAGGAAGAAGGGAAAAGGTAAAGGCACCACTGTTGGTATGGGCAAGTCAAGCAGGAGGTTTGTTAATATGTATGGATTTGACCCAACAGAATATTCATTCATCCAGTTCGTTGATCCGCTCACTGGAGCTCAAATTGAAGAGAACATCTATGCTGATATTAGAGACATCCAAGAGCGCTTTAGTGATGTCCGCAAGAAAATGGTAGAGGATGATGAAATCGAATTGCAAGCATTGGGCAGCAACACAACCATTCATGCTTACTTCAGGAAAGATTGGTCTGACAAGGCTCTAAAAATTGATTTGATGCCACACAACCCACTCAAAATCTGTGATAAATCGAATGGCATTGCTAAGTTTCCTGAAAGAGAACTTGAGTTGAGACAAACTGGGCCAGCAATAGAGGTTGATGTGAAAGACATTCCAAAACAGGAAGTGGAGCATGAAGCCAAATCACTCATGAGAGGTTTAAGGGATTTCAATCCAATTGCTCAAACAGTTTGCAGAGTAAAAGTGTCTGTTGAATATGGAACGTCTGAAATGTATGGGTTCGGTTTTGGTGCGTATATTATAGTAAACCACCATCTATTCAAGAGTTTCAATGGATCCATGGAAGTGCGATCAATGCATGGAACATTCAGAGTGAAGAATTTGCATAGCTTGAGCGTTTTACCGATCAAAAGCAGAGACATTATCATCATAAAGAAAACAAAAGATTTCCCTGTTTTCCCACAAAAACTGCACTTCCGAGCTGCAGTGCAGAATGAGAGGATTTGTTTGGTTGGAACTAATTTTCAAGAAAAACATGCATCATCAATCATCACAGAAACGAGTACTACATACAATGTACCGGGCAGCACTTTTTGGAAGCATTGGATTGAAACAAATGATGGGCATTGTGGATTACCAGTAGTGAGTACAGCTGATGGATGTCTAGTTGGAATACACAGCTTGGCGAATAATGTGCAAACCACGAATTATTATTCAGCCTTTGATGAGGATTTTGAAAGTAAGTATCTCCGAACTAATGAGCATAATGAGTGGACCAAATCGTGGGTTTATAACCCAGATACTGTGTTGTGGGGTCCATTGAAGCTCAAGGAGAGTACCCCTAAAGGCCTGTTTAAGACAACAAAACTTGTACAGGATTTA?T------TGATCATGATGTTGTTGTAGAGCAAGCTAAACATTCTGCGTGGATGTATGAGGCTCTAACAGGGAATTTGCAAGCTGTGGCGACAATGAAGAGTCAGCTGGTGACAAAGCACGTGGTCAAAGGGGAGTGTCGGCACTTCAAAGAGTTCTTAACTGTGGATTCGGAAGCAGAAGCT------TTCTTCAGGCCTTTGATGGATGCTTATGGGAAGAGCTTGTTAAATAGAGAAGCATATATAAAGGACATAATGAAATACTCAAAGCCTATTGATGTTGGAACAGTAGACTGTGAT--GCTTTTGAAGAGGCTATCAATAGGGTTATCATTTATCTGCAA-GTGCATGGCTTCCAGAAATGCAATTACATCACCGATGAGCAGGAAATTTTCAAAGCTCTCAATATGAAAGCTGCTGTCGGAGCTATGTATGGAGGCAAGAAGAAAGACTACTTTGAGCATTTTACTGAGGCGGATAAAGAGGAAATTTTTATGCAAAGTTGCCTTCGATTGTACAAGGGCTCGCTTGGCATATGGAATGGATCGTTGAAAGCAGAACTTCGGTGCAAAGAGAAGATACTTGCAAATAAGACAAGGACATTCACTGCTGCACCTTTAGATACTCTACTGGGTGGAAAGGTGTGCGTTGATGATTTTAATAATCAATTCTACTCGAAGAACATTGAATGCTGCTGGACTGTTGGAATGACTAAGTTTTATGGAGGTTGGGACAAATTGCTTCGGCGTCTACCTGAAAATT---GGGTGTACTGCGATGCCGATGGTTCACAATTCGATAGTTCACTCACCCCATACCTAATTAATGCTGTTCTCATCATCAGAAGCACATACATGGAAGATTGGGACTTGGGGTTGCAAATGTTGCGCAATTTGTACACAGAAATAATTTACACACCAATCTCAACTCCAGATGGAACAATTGTCAAGAAGTTTAGAGGTAATAATAGCGGTCAACCTTCTACCGTTGTGGATAATTCTCTCATGGTTGTCCTTGCTATGCATTACGCTCTCATTAAGGAGTGCGTTGAGTTTGAAGAAATCGACAGCACGTGTGTATTCTTTGTTAATGGTGATGACTTATTGATTGCTGTGAATCCGGAGAAAGAGAGCATTCTCGATAGAATGTCACAACATTTCTCAGATCTTGGTTTGAACTATGATTTTTCGTCGAGAACAAGAAGGAAGGAGGAATTGTGGTTCATGTCCCATAGAGGCCTGCTAATCGAGGGTATGTACGTGCCAAAGCTTGAAGAAGAGAGAATTGTATCCATTTTGCAATGGGATAGAGCTGATCTGCCAGAACACAGATTAGAAGCGATTTGTGCAGCAATGATAGAATCCTGGGGTTATTTTGAGTTAACGCACCAAATCAGGAGATTCTACTCATGGTTGTTGCAACAGCAACCTTTTTCAACGATAGCACAGGAAGGAAAAGCTCCATACATAGCGAGCATGGCATTGAAGAAGCTGTACATGGATAGGACAGTAGATGAGGAGGAACTGAAGGCTTTCACTGAAATGATG?GTTGCCTTGGATGATGAACTTGAGTGCGATACTTATGAAGTGCACCATcaaGGAAAT---------GACACAATCGATGCAGGAGGAAGCACTAAGAAGGATGCAAAACAAGAGCAAGGTAGCATTCAACCAAATCTCAACAAGGAAAAG---------------------------GAAAAGGACGTGAATGTTGGAACATCTGGAACTCATACTGTGCCACGAATTAAAGCTATCACGTCCAAAATGAGAATGCCCAAGAGTAAAGGTGCAACTGTACTAAATTTGGAACACTTACTCGAGTATGCTCCACAGCAAATTGACATCTCAAATACTCGAGCAACTCAATCACAGTTTGATACGTGGTATGAAGCGGTACAACTTGCATACGACATAGGAGAAACTGAAATGCCAACTGTGATGAATGGCCTTATGGTTTGGTGCATTGAAAATGGAACCTCGCCAAACATCAACGGAGTTTGGGTTATGATGGATGGAGATGAACAAGTCGAATACCCACTGAAACCAATCGTTGAGAATGCAAAACCAACACTTAGGCAAATCATGGCACATTTCTCAGATGTTGCAGAAGCGTATATAGAAATGCGCAACAAAAAGGAACCATATATGCCACGATATGGTTTAGTTCGTAATCTGCGCGATGGAAGTTTGGCTCGCTATGCTTTTGACTTTTATGAGGTCACATCACGAACACCAGTGAGGGCTAGGGAAGCGCACATTCAAATGAAGGCCGCAGCATTGAAATCAGCCCAACCTCGACTTTTCGGGTTGGACGGTGGCATCAGTACACAAGAGGAGAACACAGAGAGGCACACCACCGAGGATGTCTCTCCAAGTATGCATACTCTACTTGGAGTCAAGAACATGTGATTGTAGTGTCTCTCCGGACGATATATAAGTATTTACA-TATGCAGTAAGTATTTTGGCTTTTCCTGTACTACTTTTATCATAATTAATAATCAGTTTGAATATTACTAATAGATAGAGGTGGCAGGGTGATTTCGTCATTGT-GGTGACTCTATCTTTTATTTCCGCATTATT-------------------------------------------------------------------------------------------------------------------------------------------------------------------------------------------------------------------------------------AAGTCTTAGATAAAAGTGCCGGGTTGTCGTTGTTGTGGATGATC?ATCGATTAGGTGATGTTGCGATTCTGTCGTA???????????????????????????????????????????????????????????????????????????????????
	PVYNTN16_1   ???????????????????????????????????????????????????????????????????????????????????????????????????????????????????????????????????????????????????????????????????????????????????????????????????????????????????????????????????TGAATGCAAACTTCCATACTCACCCGCTCCTTTTGGGCTAGTTGCGGGGAAACGAGAAGTTTCAACC-------------------------------------------------------------------------------------------------------------------------------------------------------------------------------------------------------------------------------------------------------------------------------------------------------------------------------------------------------------------------------------------------------------------------------------------------------------------------------------------------------------------------------------------------------------------------------------------------------------------------------------------------------------------------------------------------------------------ACCACTGACCCCTTCGCAAGTTTGGAGATGCAGCTTAGTGCGCGATTACGAAGGCAAGAGTTTGCAACTATTCGAACATCCAAGAATGGTACTTGCATGTATCGATACAAGACTGATGTCCAGATTGCGCGCATTCAAAAGAAGCGCGAGGAGAGAGAAAGAGAGGAATATAATTTCCAAATGGCTGCGTCAAGTGTTGTGTCGAAGATCACTATTGCTGGTGGAGAGCCACCTTCAAAACTTGAATCACAAGTGCGGAGGGGTGTCATCCACACAACTCCAAGGATGCGCACAGCAAAAACATATCACACGCCAAAGTTGACAGAGGGACAAATGAACCACCTTATCAAGCAGGTGAAGCAAATTATGTCAACCAAAGGAGGGTCTGTTCAACTGATTAGCAAGAAAAGTACCCATGTTCACTATAAAGAAGTTTTGGGATCACATCGCGCAGTTGTTTGCACTGCA?CACATGAGAGGTTTACGAAAGAGAGTGGACTTTCGGTGTGATAAATGGACCGTTGTGCGTCTACAGCATCTCGCCAGGACGGACAAGTGGACTAACCAAGTTCGTGCTACTGATCTACGCAGGGGCGATAGTGGAGTTATATTGAGTAATACTAATCTCAAAGGAAACTTTGGAAGAAGCTCGGAGGGCCTATTCATAGTGCGTGGGTCGCACGAAGGAAAAATCTATGATGCACGTTCCAAGGTTACTCAAGGGGTTATGGATTCAATGGTTCATTTCTCAAGCGCTGAAAGCTTTTGGAAGGGATTGGACGGCACTTGGGCACAAATGAGATATCCTACAGATCATACATGTGTGGCAGGCTTACCAGTTGAGGACTGTGGCAGAGTTGCAGCGATAATGACACACAGTATTTTACCGTGCTATAAGATAACCTGCCCTACCTGTGCCCAACAATATGCCAACTTGCCAGCCAGTGACTTACTTAAGATATTACACAAGCACGCAAGTGATGGTTTAAATCGATTGGGGGCAGACAAAGATCGCTTTGTGCATGTCAAAAAGTTCTTGACAATCTTAGAGCACTTAACTGAACCAGTTGATCTGAGTCTAGAAATTTTCAATGAAGTATTCAAGTCTATAGGGGAGAAGCAACAATCACCTTTCAAAAACCTGAATATTCTGAATAATTTCTTTTTGAAAGGGAAGGAAAATACAGCTCGTGAATGGCAGGTGGCTCAATTAAGCTTACTTGAATTGGCAAGATTCCAAAAGAACAGAACGGATAATATCAAGAAAGGAGACATCTCGTTCTTTAGGAATAAACTATCTGCCAAAGCAAATTGGAACTTGTATCTGTCATGTGATAACCAGCTGGATAAGAATGCAAACTTCCTGTGGGGACAGAGAGAATATCATGCTAAGCGATTTTTCTCGAACTATTTCGAGGAAATTGATCCAGCGAAGGGCTATTCAGCATACGAAAATCGTTTGCATCCGAATGGGACAAGAAAACTTGCAATTGGAAACCTAATTGTACCACTTGATCCGGCTGAGTTTAGGCGGAAGATGAAAGGTGATTATAAAAGACAGCCAGGGGTGAGTAAGAAGTGCACGAGCTCGAAGGATGGAAACTACGTGTATCCCTGTTGTTGCACAACACTTGATGATGGCTCACCTGTTGAATCAACATTTTACCCGCCGACTAAAAAGCCCCTCGTAATAGGTAATAGTGGCGATCAAAAGTATGTTGACTTACCAAAAGGGAATTCTGAGATGTTATATATCGCCGGGCAAGGTTTCTGTTACATTAACATTTTCCTCGCGATGTTGATTAACATTAGTGAGGAAGATGCAAAGGATTTCACTAAAAAGGTTCGTGACATGTGTGTGCCAAAGCTTGGAACCTGGCCAACCATGATGGATCTGGCTACAACTTGTGCTCAAATGAAAATATTCTACCCTGATGTTCATGATGCAAAACTGCCTAAAATACTAGTCGATCACAAAACGCAAACATGCCATGTGGTTGACTCGTTTGGCTCACAAACAACTGGGTATCATATTTTGAAAGCATCTAGCGTGTCCCAACTTATTTTGTTTGCTAATGATGAGTTGGAGTCTGACATTAAGCACTATAGAGTTGGTGGTATTCCTAATGCATGCCCTGAACTTGGGTCTACAAT-ATCACCTTTCAAAGAAGGAGGAGTTATAATGTCTGAGTCGGCAGCGCTGAAACTGCTTTTGAAGGGAATTTTTAGACCTAAGGTGATGAGACAGTTGCTGTTAGATGAGCCTTACCTGTTGATTCTATCAATATTATCCCCTGGCATACTGATGGCTATGTACAATAATGGGATTTTTGAACTTGCGGTAAGGTTGTGGATTAATGAGAAACAATCCATAGCTATGATAGCATCGCTACTATCAGCTTTAGCCCTACGAGTGTCAGCGGCAGAAACACTCGTCGCACAGAGGATTATAATTGATACTGCAGCCACAGATCTCCTTGATGCTACGTGCGATGGGTTCAACCTACATCTAACGTACCCCACTGCGTTGATGGTGTTGCAAGTTGTTAAGAATAGAAATGAATGTGATGATACCCTATTCAAGGCGGGTTTTCCAAGTTACAACACGAGCGTCGTACAGATCATGGAAAAAAATTATCTAAATCTCTTTGACGATGCTTGGAAAGATTTAACTTGGCGGGAAAAATTATCCGCAACATGGTACTCATACAGAGCAAAACGCTCTATCACTCGGTACATAAAACCCACAGGAAGGGCAGATTTGAAAGGGTTATACAACATATCACCACAAGCATTCTTGGGCCGAGGCGCCCAGGTGGTCAAAGGCACTGCCTCAGGATTGAGCGAGCGATTTAATAATTATTTCAATACTAAGTGTGTGAATATTTCATCCTTTTTCATTCGTAGAATCTTTAGGCGTTTGCCAACTTTCGTCACTTTTGTTAACTCATTATTAGTTATTAGTATGTTAACCAGCGTAGTGGCAGTGTGTCAGGCAATAATTTTAGATCAGAGGAAGTATAGGAGAGAAATTGAGTTGATGCAGATAGAGAAGAATGAGATCGTCTGCATGGAGCTATATGCAAGTTTACAGCGCAAACTTGAACGCGATTTCACATGGGATGAGTACATTGAGTATTTGAAGTCAGTAAACCCTCAGATAGTTCAGTTTGCTCAAGCGCAGATGGAAGAATATGATGTGCGACACCAGCGTTCCACACCAGGTGTTAAAAATTTGGAACAAGTGGTAGCATTTATGGCTTTAGTCATCATGGTGTTCGATGCTGAAAGGAGTGATTGCGTGTTCAAAACTCTCAATAAATTTAAGGGTGTCCTTTCCTCACTGGACCATGAAGTTAGACATCAGTCCTTAGACGATGTGATCAAGAATTTTGATGAGAGGAATGAGACTATTGATTTTGAATTGAGTGAGGACACAATTCGAACATCATCAGTGCTAGATACAAAGTTTAGTGATTGGTGGGACCGACAAATCCAGATGGGACATACACTTCCACATTACAGAACCGAGGGGCACTTCATGGAATTCACAAGAGCAACTGCTGTCCAAGTGGCTAATGATATCGCCCACAGCGAACACCTAGACTTTCTAGTAAGGGGAGCTGTTGGGTCTGGAAAGTCAACTGGGTTGCCTGTTCATCTTAGTGTAGCCGGATCTGTGCTTTTAATTGAACCAACGCGACCACTAGCGGAGAACGTTTTCAAACAGCTATCTAGTGAACCATTCTTCAAGAAGCCAACACTGCGTATGCGCGGAAATAGTATATTTGGCTCTTCTCCAATCTCCGTCATGACTAGCGGATTTGCGCTACACTACTTCGCCAATAATCGCTCTCAATTAGCTCAGTTCAACTTTGTGATATTTGATGAGTGCCATGTTCTGGATCCTTCCGCAATGGCGTTCCGCAGTCTGCTGAGTGTTTATCATCAAGCATGCAAAGTATTAAAAGTGTCAGCTACTCCAGTGGGAAGAGAGGTTGAATTTACAACACAGCAACCAGTCAAGTTAATAGTGGAGGACACACTGTCTTTCCAATCATTTGTTGATGCACAAGGTTCTAAAACTAATGCTGATGTTGTTCAGTTTGGTTCAAACGTACTTGTGTACGTGTCGAGCTACAATGAAGTTGACACCTTGGCTAAGCTCCTAACAGACAAGAATATGATGGTCACAAAGGTTGATGGCAGAACAATGAAGCACGGTTGCCTAGAAATTGTCACAAAAGGAACCAGTGCGAGACCACATTTTGTTGTAGCAACCAACATAATTGAGAATGGAGTGACTTTGGACATAGACGTGGTTGTAGATTTTGGGTTGAAAGTCTCACCGTTCTTGGACATTGACAATAGGAGCATTGCTTACAATAAGGTGAGTGTTAGCTATGGTGAGAGAATTCAAAGGCTGGGTCGTGTTGGACGCTTCAAGAAAGGAGTAGCATTGCGCATTGGACACACTGAGAAGGGAATTATTGAAATTCCAAGCATGATCGCTACAGAGGCGGCTCTTGCTTGCTTTGCATATAACTTGCCAGTGATGACAGGAGGCGTCTCAACTAGCCTGATTGGCAATTGTACTGTGCGCCAAGTTAAAACAATGCAGCAATTTGAATTGAGTCCCTTCTTTATCCAGAATTTCGTTGCCCACGATGGATCAATGCATCCTGTCATACATGACATTCTTAAAAAGTATAAACTTCGAGATTGTATGACACCTTTGTGCGATCAGTCTATACCATACAGGGCATCGAGCACTTGGTTATCGGTTAGTGAATATGAGCGACTTGGAGTGGCCTTAGAAATTCCAAAGCAAGTCAAAATTGCATTCCATATCAAAGAGATCCCTCCTAAGCTCCACGAAATGCTTTGGGAAACGGTTGTCAAGTACAAAGACGTTTGCTTATTTCCAAGCATT-CGAGCATCGTCCATCAGCAAAATCGCATACACATTGCGTACAGACCTCTTCGCCATCCCAAGAACTCTAATATTGGTGGAGAGACTGCTTGAAGAGGAGCGAGTGAAGCAGAGCCAATTCAGAAGTCTCATCGACGAAGGATGCTCAAGCATGTTTTCAATTGTCAACTTGACAAACACTCTCAGAGCTAGATATGCAAAAGATTACACCGCAGAGAATATACAAAAACTTGAGAAAGTGAGAAGTCAATTGAAAGAATTCTCAAATTTGGATGGTTCTGCATGTGAGGAAAATTTAATAAAGAGGTATGAGTCTTTGCAGTTCGTTCATCACCAAGTTGCGACGTCACTTGCAAAGGATCTCAAGTTGAAGGGGACTTGGAAGAAGTCATTAGTGGCCAAAGATTTGATCATAGCAGGCGCTGTTGCAATTGGTGGAATAGGACTCATATATAGTTGGTTCACACAATCAGTTGAGACTGTGTCTCATCAAGGGAAAAATAAATCCAAAAGAATTCAAGCCTTGAAGTTTCGCCATGCTCGTGACAAAAGGGCTGGCTTTGAAATTGACAACAATGATGACACAATAGAGGAATTCTTTGGATCTGCATACAGGAAGAAGGGAAAAGGTAAAGGCACCACTGTTGGTATGGGCAAGTCAAGCAGGAGGTTTGTTAATATGTATGGATTTGACCCAACAGAATATTCATTCATCCAGTTCGTTGATCCGCTCACTGGAGCTCAAATTTAAGAGAACATCTATGCTGATATTAGAGACATCCAAGAGCGCTTTAGTGATGTCCGCAAGAAAATGGTAGAGGATGATGAAATCGAATTGCAAGCATTGGGCAGCAACACAACCATTCATGCTTACTTCAGGAAAGATTGGTCTGACAAGGCTCTAAAAATTGATTTGATGCCACACAACCCACTCAAAATCTGTGATAAATCGAATGGCATTGCTAAGTTTCCTGAAAGAGAACTTGAGTTGAGACAAACTGGGCCAGCAATAGAGGTTGATGTGAAAGACATTCCAAAACAGGAAGTGGAGCATGAAGCCAAATCACTCATGAGAGGTTTAAGGGATTTCAATCCAATTGCTCAAACAGTTTGCAGAGTAAAAGTGTCTGTTGAATATGGAACGTCTGAAATGTATGGGTTCGGTTTTGGTGCGTATATTATAGTAAACCACCATCTATTCAAGAGTTTCAATGGATCCATGGAAGTGCGATCAATGCATGGAACATTCAGAGTGAAGAATTTGCATAGCTTGAGCGTTTTACCGATCAAAAGCAGAGACATTATCATCATAAAGAAAACAAAAGATTTCCCTGTTTTCCCACAAAAACTGCACTTCCGAGCTGCAGTGCAGAATGAGAGGATTTGTTTGGTTGGAACTAATTTTCAAGAAAAACATGCATCATCAATCATCACAGAAACGAGTACTACATACAATGTACCGGGCAGCACTTTTTGGAAGCATTGGATTGAAACAAATGATGGGCATTGTGGATTACCAGTAGTGAGTACAGCTGATGGATGTCTAGTTGGAATACACAGCTTGGCGAATAATGTGCAAACCACGAATTATTATTCAGCCTTTGATGAGGATTTTGAAAGTAAGTATCTCCGAACTAATGAGCATAATGAGTGGACCAAATCGTGGGTTTATAACCCAGATACTGTGTTGTGGGGTCCATTGAAGCTCAAGGAGAGTACCCCTAAAGGCCTGTTTAAGACAACAAAACTTGTACAGGATTTAAT------TGATCATGATGTTGTTGTAGAGCAAGCTAAACATTCTGCGTGGATGTATGAGGCTCTAACAGGGAATTTGCAAGCTGTGGCGACAATGAAGAGTCAGCTGGTGACAAAGCACGTGGTCAAAGGGGAGTGTCGGCACTTCAAAGAGTTCTTAACTGTGGATTCGGAAGCAGAAGCT------TTCTTCAGGCCTTTGATGGATGCTTATGGGAAGAGCTTGTTAAATAGAGAAGCATATATAAAGGACATAATGAAATACTCAAAGCCTATTGATGTTGGAACAGTAGACTGTGAT--GCTTTTGAAGAGGCTATCAATAGGGTTATCATTTATCTGCAA-GTGCATGGCTTCCAGAAATGCAATTACATCACCGATGAGCAGGAAATTTTCAAAGCTCTCAATATGAAAGCTGCTGTCGGAGCTATGTATGGAGGCAAGAAGAAAGACTACTTCGAGCATTTTACTGAGGCGGATAAAGAGGAAATTGTTATGCAAAGTTGCCTTCGATTGTACAAGGGCTCGCTTGGCATATGGAATGGATCGTTGAAAGCAGAACTTCGGTGCAAAGAGAAGATACTTGCAAATAAGACAAGGACATTCACTGCTGCACCTTTAGATACTCTACTGGGTGGAAAGGTGTGCGTTGATGATTTTAATAATCAATTCTACTCGAAGAACATTGAATGCTGCTGGACTGTTGGAATGACTAAGTTTTATGGAGGTTGGGACAAATTGCTTCGGCGTCTACCTGAAAATT---GGGTGTACTGCGATGCCGATGGTTCACAATTCGATAGTTCACTCACCCCATACCTAATTAATGCTGTTCTCATCATCAGAAGCACATACATGGAAGATTGGGACTTGGGGTTGCAAATGTTGCGCAATTTGTACACAGAAATAATTTACACACCAATCTCAACTCCAGATGGAACAATTGTCAAGAAGTTTAGAGGTAATAATAGCGGTCAACCTTCTACCGTTGTGGATAATTCTCTCATGGTTGTCCTTGCTATGCATTACGCTCTCATTAAGGAGTGCGTTGAGTTTGAAGAAATCGACAGCACGTGTGTATTCTTTGTTAATGGTGATGACTTATTGATTGCTGTGAATCCGGAGAAAGAGAGCATTCTCGATAGAATGTCACAACATTTCTCAGATCTTGGTTTGAACTATGATTTTTCGTCGAGAACAAGAAGGAAGGAGGAATTGTGGTTCATGTCCCATAGAGGCCTGCTAATCGAGGGTATGTACGTGCCAAAGCTTGAAGAAGAGAGAATTGTATCCATTTTGCAATGGGATAGAGCTGATCTGCCAGAAAACAGATTAGAAGCGATTTGTGCAGCAATGATAGAATCCTGGGGTTATTTTGAGTTAACGCACCAAATCAGGAGATTCTACTCATGGTTGTTGCAACAGCAACCTTTTTCAACGATAGCACAGGAAGGAAAAGCTCCATACATAGCGAGCATGGCATTGAAGAAGCTGTACATGGATAGGACAGTAGATGAGGAGGAACTGAAGGCTTTCACTGAAATGATG?GTTGCCTTGGATGATGAACTTGAGTGCGATACTTATGAAGTGCACCATCAAGGAAAT---------GACACAATCGATGCAGGAGGAAGCACTAAGAAGGATGCAAAACAAGAGCAAGGTAGCATTCAACCAAATCTCAACAAGGAAAAG---------------------------GAAAAGGACGTGAATGTTGGAACATCTGGAACTCATACTGTGCCACGAATTAAAGCTATCACGTCCAAAATGAGAATGCCCAAGAGCAAAGGTGCAACTGTACTAAATTTGGAACACTTACTCTAGTATGCTCCACAGCAAATTGACATCTCAAATACTCGAGCAACTCAATCACAGTTTGATACGTGGTATGAAGCTGTACAACTTGCATACGACATAGGAGAAACTGAAATGCCAACTGTGATGAATGGGCTTATGGTTTGGTGCATTGAAAATGGAACCTCGCCAAACATCAACGGAGTTTGGGTTATGATGGATGGAGATGAACAAGTCGAATACCCACTGAAACCAATCGTTGAGAATGCAAAACCAACACTTAGGCAAATCATGGCACATTTCTCAGATGTTGCAGAAGCGTATATAGAAATGCGCAACAAAAAGGAACCATATATGCCACGATATGGTTTAGTTCGTAATCTGCGCGATGGAAGTTTGGCTCGCTATGCTTTTGACTTTTATGAGGTCACATCACGAACACCAGTGAGGGCTAGGGAAGCGCACATTCAAATGAAGGCCGCAGCATTGAAATCAGCCCAACCTCGACTTTTCGGGTTGGACGGTGGCATCAGTACACAAGAGGAGAACACAGAGAGGCACACCACCGAGGATGTCTCTCCAAGTATGCATACTCTACTTGGAGTCAAGAACATGTGATTGTAGTGTCTCTCCGGACGATATATAAGTATTTACA-TATGCAGTAAGTATTTTGGCTTTTCCTGTACTACTTTTATCATAATTAATAATCAGTTTGAATATTACTAATAGATAGAGGTGGCAGGGTGATTTCGTCATTGT-GGTGACTCTATCTTTTAATTCCGCATTATT-------------------------------------------------------------------------------------------------------------------------------------------------------------------------------------------------------------------------------------AAGTCTTAAATAAAAGTGCCGGGTTGTCGTTGTTGTGGATGATTCATCGATTAGGTGATGTTGCGATTCTGTCG?????????????????????????????????????????????????????????????????????????????????????
	PVYNTN17_1   ???????????????????????????????????????????????????????????????????????????????????????????????????????????????????????????????????????????????????????????????????????????????????????????????????????????????????????????????????TGAATGCAAACTTCCATACTCACCCGCTCCTTTTGGGCTAGTTGCGGGGAAACGAGAAGTTTCAACC-------------------------------------------------------------------------------------------------------------------------------------------------------------------------------------------------------------------------------------------------------------------------------------------------------------------------------------------------------------------------------------------------------------------------------------------------------------------------------------------------------------------------------------------------------------------------------------------------------------------------------------------------------------------------------------------------------------------ACCACTGACCCCTTCGCAAGTTTGGAGATGCAGCTTAGTGCGCGATTACGAAGGCAAGAGTTTGCAACTATTCGAACATCCAAGAATGGTACTTGCATGTATCGATACAAGACTGATGTCCAGATTGCGCGCATTCAAAAGAAGCGCGAGGAGAGAGAAAGAGAGGAATATAATTTCCAAATGGCTGCGTCAAGTGTTGTGTCGAAGATCACTATTGCTGGTGGAGAGCCACCTTCAAAACTTGAATCACAAGTGCGGAGGGGTGTCATCCACACAACTCCAAGGATGCGCACAGCAAAAACATATCACACGCCAAAGTTGACAGAGGGACAAATGAACCACCTTATCAAGCAGGTGAAGCAAATTATGTCAACCAAAGGAGGGTCTGTTCAACTGATTAGCAAGAAAAGTACCCATGTTCACTATAAAGAAGTTTTGGGATCACATCGCGCAGTTGTTTGCACTGCA?CACATGAGAGGTTTACGAAAGAGAGTGGACTTTCGGTGTGATAAATGGACCGTTGTGCGTCTACAGCATCTCGCCAGGACGGACAAGTGGACTAACCAAGTTCGTGCTACTGATCTACGCAAGGGCGATAGTGGAGTTATATTGAGTAATACTAATCTCAAAGGAAACTTTGGAAGAAGCTCGGAGGGCCTATTCATAGTGCGTGGGTCGCACGAAGGAAAAATCTATGATGCACGTTCCAAGGTTACTCAAGGGGTTATGGATTCAATGATTCAGTTCTCAAGCGCTGAAAGCTTTTGGAAGGGACTGGACGGCAATTGGGCACAAATGAGATATCCTACAGATCATACATGTGTGGCAGGCTTACCAGTTGAGGACTGTGGCAGAGTTGCAGCGATAATGACACACAGTATTTTACCGTGCTATAAGATAACCTGCCCTACCTGTGCCCAACAATATGCCAACTTGCCAGCCAGTGACTTGCTTAAGATATTACACAAGCACGCAAGTGATGGTTTAAATCGATTGGGGGCAGACAAAGATCGCTTTGTGCATGTCAAAAAGTTCTTGACAATCTTAGAGCACTTAACTGAACCGGTTGATCTGAGTCTAGAAATTTTCAATGAAGTATTCAAGTCTATAGGGGAGAAGCAACAATCACCTTTCAAAAACCTGAATATTCTGAATAATTTCTTTTTGAAAGGAAAGGAAAATACAGCTCGTGAATGGCAGGTGGCTCAATTAAGCTTACTTGAATTGGCAAGATTCCAAAAGAACAGAACGGATAATATCAAGAAAGGAGACATCTCGTTCTTTAGGAATAAACTATCTGCCAAAGCAAATTGGAACTTGTATCTGTCATGTGATAACCAGCTGGATAAGAATGCAAACTTCCTGTGGGGACAGAGAGAATATCATGCTAAGCGATTTTTCTCGAACTATTTCGAGGAAATTGATCCACCGAAGGGCTATTCAGCATACGAAAATCGTTTGCATCCGAATGGGACAAGAAAACTTGCAATTGGAAACCTAATTGTACCACTTGATCTGGCTGAGTTTAGGCGGAAGATGAAAGGTGATTATAAAAGACAGCCAGGGGTGAGTAAGAAGTGCACGAGCTCGAAGGATGGAAACTACGTGTATCCCTGGTGGTGCACTACACTTGATGATGGCTCACCTGTTGAATCAACATTTTACCCGCCAACTAAAAAGCACCTCGTAATAGGTAATAGTGGCGATCAAAAGTATGTTGACTTACCAAAAGGGAAT?CTGAGATGTTATATATTGCCAGGCAAGGTTTCTGTTACATTAACATTTTCCTCGCGATGTTGATTAACATTAGTGAGGAAGATGCAAAGGATTTCACTAAGAAGGTTCGTGACATGTGTGTGCCAAAGCTTGGAACCTGGCCAACCATGATGGATCTGGCTACAACTTGTGCTCAAATGAAAATATTCTACCCTGATGTTCATGATGCAGAACTGCCTAGAATACTAGTCGATCACGAAACGCAGACATGCCATGTGGTTGACTCGTTTGGCTCACAAACAACTGGGTATCATATTTTGAAAGCATCTAGCGTGTCCCAACTTATTTTGTTTGCTAATGATGAGTTGGAGTCTGACATTAAGCACTATAGAGTTGGTGGTATTCCTAATGCATGCCCTGAACTTGGGTCTACAAT-ATCACCTTTCAGAGAAGGAGGAGTTATAATGTCTGAGTCGGCAGCGCTGAAACTGCTTTTGAAGGGAATTTTTAGACCTAAGGTGATGAGACAGTTGCTGTTAGATGAGCCTTACCTGTTGATTCTATCAATATTATCCCCTGGCATACTGATGGCTATGTACAATAATGGGATTTTTGAACTTGCGGTAAGGTTGTGGATTAATGAGAAACAATCCATAGCTATGATAGCATCGCTACTATCAGCTTTAGCCCTACGAGTGTCAGCGGCAGAAACACTCGTCGCACAGAGGATTATAATTGATACTGCAGCCACAGATCTCCTTGATGCTACGTGCGATGGGTTCAACCTACATCTAACGTACCCCACTGCGTTGATGGTGTTGCAAGTTGTTAAGAATAGAAATGAATGTGATGATACCCTATTCAAGGCGGGTTTTCCAAGTTACAACACGAGCGTCGTACAGATCATGGAAAAAAATTATCTAAATCTCTTGAACGATGCTTGGAAAGATTTAACTTGGCGGGAAAAATTATCCGCAACATGGTACTCATACAGAGCAAAACGCTCTATCACTCGGTACATAAAACCCACAGGAAGGGCAGATTTGAAAGGGTTATACAACATATCACCACAAGCATTCTTGGGCCGAGGCGCCCAGGTGGTCAAAGGCACTGCCTCAGGATTGAGCGAGCGATTTAATAATTATTTCAATACTAAGTGTGTGAATATTTCATCCTTTTTCATTTGTAGAATCTTTAGGGGTTTGCCAACTTTTGTCACTTTTGTTAACTCATTATTAGTTATTAGTATGTTAACCAGGGTAGGGGCAGTGTGTCAGGCAATAATTTTAGATCAGAGGAAGTATAGGAGAGAAATTGAGTTGATGCAGATAGAGAAGAAAGAGATTGTTTGCATGGAGCTATATGCAAGTTTACAGGGCAAAATTGAACGCGATTTCACATGGGATGAGTACATTGAGTATTTGAAGTCAGTAAACCCTCAGATAGTTCAGTTTGCTCAAGCGCAGATGGAAGAATATGATGTGCGACACCAGCGTTCCACACCAGGTGTTAAAAATTTGGAGCAAGGGGTGGCATTTATGGCTTTGGTCATCATGGTGTTTGATGATGAAAGGAGGGAATGCGTGTTCAAAAATCTCAATAAATTTAAGGGTGTCCTTTCCTCACTGGACCATGAAGTTAGACATCAGTCCTTAGACGAAGTGATCAAGAATTTTGATGAGAGGAATGAGACTATTGATTTTGAATTGAGTGAGGACACAATTCGAACATCATCAGTGCTAGATACAAAGTTTAGTGATTGGTGGGACCGACAAATCCAGATGGGACATACACTTCCACATTACAGAACCGAGGGGCACTTCATGGAATTCACAAGAGCAACTGCTGTCCAAGTGGCTAATGATATCGCCCACAGCGAACACCTAGACTTTCTAGTAGGGGGAGCTGTTGGGTCGGGAAAGTCAACTGGGTTGCCTGTTCATCTTAGTGTACCCGGATCTGTGCTTTTAATTGAACCAACGCGACCACTAGCGGAAAACTTTTTCAAACAGCTATCTAGTGAACCATTCTTCAAAAAGCCAACACTGCGTATGCGTGGAAATAGTATATTTGGCTCTTCTCCAATCTCCGTCATGACTAGCGGTTTTGCGCTACACTACTTCCCCAATAATCGCTCTCAATTAGCTCATTTCAACTTTGTGATATTTGATGAGTGCCATGTTCTGGATCCTTCCGCAATGGCTTTCCGCATTCTGCTGAGTGTTTATCATCAAGCATGCAAAGTATTAAAAGTGTCACCTACTCCAGTGGGAAGAGAGGTTGAATTTACAACACACCACCCAGTCAATTTAATAGTGGAGGACACACTGTCTTTCCAATCATTTGTTGATGCACAAGGTTCTAAAACTAATGCTGATGTTGTTCATTTTGGTTCAAACGTACTTGTGTACGTGTCGAGCTACAATGAATTTGACACCTTGGCTAACCTCCTAACAAACAAAAATATGATGGTCACAAAGGTTGATGGCAGAACAATGAAGCACGGTTGCCTAGAAATTGTCACAAAAGGAACCAGTGCGAGACCACATTTTGTTGTAGCAACCAACATAATTGAGAATGGAGTGACTTTGGACATAGACGTGGTTGTAGATTTTGGGTTGAAAGTCTCACCGTTCTTGGACATTGACAATAGGAGCATTGCTTACAATAAGGTGAGTGTTAGCTATGGTGAGAGAATTCAAAGGCTGGGTCGTGTTGGACGCTTCAAGAAAGGAGTAGCATTGCGCATTGGACACACTGAGAAGGGAATTATTGAAATTCCAAGCATGATCGCTACAGAGGCGGCTCTTGCTTGCTTTGCATATAACTTGCCAGTGATGACAGGAGGCGTCTCAACTAGTCTGATTGGCAATTGTACTGTGCGCCAATTTAAAACAATGCAGCAATTTGAATTGAGTCCCTTCTTTATCCAGAATTTCGTTGCCCACGATGGATCAATGCATCCTGTCATACATGACATTCTTAAAAAGTATAAACTTCGAGATTGTATGACACCTTTGTGCGATCAGTCTATACCATACAGGGCATCGAGCACTTGGTTATCGGTTAGTGAATATGAGCGACTTGGAGTGGCCTTAGAAATTCCAAAGCAAGTCAAAATTGCATTCCATATCAAAGAGATCCCTCCTAAGCTCCACGAAATGCTTTGGGAAACGGTTGTCAAGTACAAAGACGTTTGCTTATTTCCAAGCATT-CGAGCATCGTCCATCAGCAAAATCGCATACACATTGCGTACAGACCTCTTCGCCATCCCAAGAACTCTAATATTGGTGGAGAGACTGCTTGAAGAGGAGCGAGTGAAGCAGAGCCAATTCAGAAGTCTCATCGACGAAGGATGCTCAAGCATGTTTTCAATTGTCAACTTGACAAACACTCTCAGAGCTAGATATGCAAAAGATTACACCGCAGAGAATATACAAAAACTTGAGAAAGTGAGAAGTCAATTGAAAGAATTCTCAAATTTGGATGGTTCTGCATGTGAGGAAAATTTAATAAAGAGGTACGAGTCTTTGCAGTTCGTTCATCACCAAGTTGCGACGTCACTTGCAAAGGATCTCAAGTTGAAGGGGACTTGGAAGAAGTCATTAGTGGCCAAAGATTTGATTATAGCAGGCGCTGTTGCAATTGGTGGAATAGGACTCATATATAGTTGGTTCACACAATCAGTTGAGACTGTGTCTCACCAAGGGAAAAATAAATCTAAAAGAATTCAAGCCTTGAAGTTTCGCCATGCTCGTGACAAAAGGGCTGGCTTTGAAATTGACAACAATGATGACACAATAGAGGAATTCTTTGGATCTGCATACAGGAAGAAGGGAAAAGGTAAAGGCACCACTGTTGGTATGGGCAAGTCAAGCAGGAGGTTTGTTAATATGTATGGATTTGACCCAACAGAATATTCATTCATCCAGTTCGTTGATCCGCTCACTGGAGCTCAAATTTAAGAGAACATCTATGCTGATATTAGAGACATCCAAGAGCGCTTTAGTGATGTCCGCAAGAAAATGGTAGAGGATGATGAAATCGAATTGCAAGCATTGGGCAGCAACACAACCATTCATGCTTACTTCAGGAAAGATTGGTCTGACAAGGCTCTAAAAATTGATTTGATGCCACACAACCCACTCAAAATCTGTGATAAATCGAATGGCATTGCTAAGTTTCCTGAAAGAGAACTTGAGTTGAGACAAACTGGGCCAGCAATAGAGGTTGATGTGAAAGACATTCCAAAACAGGAAGTGGAGCATGAAGCCAAATCACTCATGAGAGGTTTAAGGGATTTCAATCCAATTGCTCAAACAGTTTGCAGAGTAAAAGTGTCTGTTGAATATGGAACGTCTGAAATGTATGGGTTCGGTTTTGGTGCGTATATTATAGTAAACCACCATCTATTCAAGAGTTTCAATGGATCCATGGAAGTGCGATCAATGCATGGAACATTCAGAGTGAAGAATTTGCATAGCTTGAGCGTTTTACCGATCAAAAGCAGAGACATTATCATCATAAAGAAAACAAAAGATTTCCCTGTTTTCCCACAAAAACTGCACTTCCGAGCTGCAGTGCAGAATGAGAGGATTTGTTTGGTTGGAACTAATTTTCAAGAAAAACATGCATCATCAATCATCACAGAAACGAGTACTACATACAATGTACCGGGCAGCACTTTTTGGAAGCATTGGATTGAAACAAATGATGGGCATTGTGGATTACCAGTAGTGAGTACAGCTGATGGATGTCTAGTTGGAATACACAGCTTGGCGAATAATGTGCAAACCACGAATTATTATTCAGCCTTTGATGAGGATTTTGAAAGTAAGTATCTCCGAACTAATGAGCATAATGAGTGGACCAAATCGTGGGTTTATAACCCAGATACTGTGTTGTGGGGTCCATTGAAGCTCAAGGAGAGTACCCCTAAAGGCCTGTTTAAGACAACAAAACTTGTACAGGATTTAAT------TGATCATGATGTTGTTGTAGAGCAAGCTAAACATTCTGCGTGGATGTATGAGGCTCTAACAGGGAATTTGCAAGCTGTGGCGACAATGAAGAGTCAGCTGGTGACAAAGCACGTGGTCAAAGGGGAGTGTCGGCACTTCAAAGAGTTCTTAACTGTGGATTCGGAAGCAGAAGCT------TTCTTCAGGCCTTTGATGGATGCTTATGGGAAGAGCTTGTTAAATAGAGAAGCATATATAAAGGACATAATGAAATACTCAAAGCCTATTGATGTTGGAACAGTAGACTGTGAT--GCTTTTGAAGAGGCTATCAATAGGGTTATCATTTATCTGCAA-GTGCTTGGCTTCCAGAAATGCAATTACTTCACCGATGAGCAGGAAATTTTCAAAGCTCTCAATATGAAAGCTGCTGTCGGAGCTATGTATGGAGGCAAGAAGAAAGACTACTTCGAGCATTTTACTGAGGCGGATAAAGAGGAAATTGTTATGCAAAGTTGCCTTCGATTGTACAAGGGCTCGCTTGGCATATGGAATGGATCGTTGAAAGCAGAACTTCGGTGCAAAGAGAAGATACTTGCAAATAAGACAAGGACATTCACTGCTGCACCTTTAGATACTCTACTGGGTGGAAAGGTGTGCGTTGATGATTTTAATAATCAATTCTACTCGAAGAACATTGAATGCTGCTGGACTGTTGGAATGACTAAGTTTTATGGAGGTTGGGACAAATTGCTTCGGCGTCTACCTGAAAATT---GGGTGTACTGCGATGCCGATGGTTCACAATTCGATAGTTCACTCACCCCATACCTAATTAATGCTGTTCTCATCATCAGAAGCACATACATGGAAGATTGGGACTTGGGGTTGCAAATGTTGCGCAATTTGTACACAGAAATAATTTACACACCAATCTCAACTCCAGATGGAACAATTGTCAAGAAGTTTAGAGGTAATAATAGCGGTCAACCTTCTACCGTTGTGGATAATTCTCTCATGGTTGTCCTTGCTATGCATTACGCTCTCATTAAGGAGTGCGTTGAGTTTGAAGAAAT?GACAGCACGTGTGTATTCTTTGTTAATGGTGATGACTTATTGATTGCTGTGAATCCGGAGAAAGAGAGCATTCTCGATAGAATGTCACAACATTTCTCAGATCTTGGTTTGAACTATGATTTTTCGTCGAGAACAAGAAGGAAGGAGGAATTGTGGTTCATGTCCCATAGAGGCCTGCTAATCGAGGGTATGTACGTGCCAAAGCTTGAAGAAGAGAGAATTGTATCCATTTTGCAATGGGATAGAGCTGATCTGCCAGAAAACAGATTAGAAGCGATTTGTGCAGCAATGATAGAATCCTGGGGTTATTTTGAGTTAACGCACCAAATCAGGAGATTCTACTCATGGTTGTTGCAACAGCAACCTTTTTCAACGATAGCACAGGAAGGAAAAGCTCCATACATAGCGAGCATGGCATTGAAGAAGCTGTACATGGATAGGACAGTAGATGAGGAGGAACTGAAGGCTTTCACTGAAATGATG?GTTGCCTTGGATGATGAACTTGAGTGCGATACTTATGAAGTGCACCATCAAGGAAAT---------GACACAATCGATGCAGGAGGAAGCACTAAGAAGGATGCAAAACAAGAGCAAGGTAGCATTCAACCAAATCTCAACAAGGAAAAG---------------------------GAAAAGGACGTGAATGTTGGAACATCTGGAACTCATATTGTGCCAGGAATTAAAGCTATCAGGTCCAAAATGAGAATGCCCAAGAGTAAAGGTGCAACTGTACTAAATTTGGAACACTTACTCGAGTATGCTCCACAGCAAATTGACATCTCAAATACTCGAGCAACTCAATCACAGTTTGATACGTGGTATGAAGCGGTACAACTTGCATACGACATAGGAGAAACTGAAATGCCAACTGTGATGAATGGGCTTATGGTTTGGTGCATTGAAAATGGAACCTCGCCAAACATCAACGGAGTTTGGGTTATGATGGATGGAGATGAACAAGTCGAATACCCACTGAAACCAATCGTTGAGAATGCAAAACCAACACTTAGGCAAATCATGGCACATTTCTCAGATGTTGCAGAAGCGTATATAGAAATGCGCAACAAAAAGGAACCATATATGCCACGATATGGTTTAGTTCGTAATCTGCGCGATGGAAGTTTGGCTCGCTATGCTTTTGACTTTTATGAGGTCACATCACGAACACCAGTGAGGGCTAGGGAAGCGCACATTCAAATGAAGGCCGCAGCATTGAAATCAGCCCAATCTCGACTTTTCGGGTTGGACGGTGGCATCAGTACACAAGAGGAGAACACAGAGAGGCACACCACCGAGGATGTCTCTCCAAGTATGCATACTCTACTTGGAGTCAAGAACATGTGATTGTAGTGTCTCTCCGGACGATATATAAGTATTTACA-TATGCAGTAAGTATTTTGGCTTTTCCTGTACTACTTTTATCATAATTAATAATCAGTTTGAATATTACTAATAGATAGAGGTGGCAGGGTGATTTCGTCATTGT-GGTGACTCTATCTTTTAATTCCGCATTATT-------------------------------------------------------------------------------------------------------------------------------------------------------------------------------------------------------------------------------------AAGTCTTAGATAAAAGTGCCGGGTTGTCGTTGTTGTGGATGATTCATCGATTAGGTGATGTTGCGATTCTGTCGTA???????????????????????????????????????????????????????????????????????????????????
	PVYNTN23_1   ???????????????????????????????????????????????????????????????????????????????????????????????????????????????????????????????????????????????????????????????????????????????????????????????????????????????????????????????????TGAATGCAAACTTCCATACTCACCCGCTCCTTTTGGGCTAGTTGCGGGGAAACGAGAAGTTTCAACC-------------------------------------------------------------------------------------------------------------------------------------------------------------------------------------------------------------------------------------------------------------------------------------------------------------------------------------------------------------------------------------------------------------------------------------------------------------------------------------------------------------------------------------------------------------------------------------------------------------------------------------------------------------------------------------------------------------------ACCACTGACCCCTTCGCAAGTTTGGAGATGCAGCTTAGTGCGCGATTACGAAGGCAAGAGTTTGCAACTATTCGAACATCCAAGAATGGTACTTGCATGTATCGATACAAGACTGATGTCCAGATTGCGCGCATTCAAAAGAAGCGCGAGGAGAGAGAAAGAGAGGAATATAATTTCCAAATGGCTGCGTCAAGTGTTGTGTCGAAGATCACTATTGCTGGTGGAGAGCCACCTTCAAAACTTGAATCACAAGTGCGGAGGGGTGTCATCCACACAACTCCAAGGATGCGCACAGCAAAAACATATCACACGCCAAAGTTGACAGAGGGACAAATGAACCACCTTATCAAGCAGGTGAAGCAAATTATGTCAACCAAAGGAGGGTCTGTTCAACTGATTAGCAAGAAAAGTACCCATGTTCACTATAAAGAAGTTTTGGGATCACATCGCGCAGTTGTTTGCACTGCA?CACATGAGAGGTTTACGAAAGAGAGTGGACTTTCGGTGTGATAAATGGACCGTTGTGCGTCTACAGCATCTCGCCAGGACGGACAAGTGGACTAACCAAGTTCGTGCTACTGATCTACGCAAGGGCGATAGTGGAGTTATATTGAGTAATACTAATCTCAAAGGAAACTTTGGAAGAAGCTCGGAGGGCCTATTCATAGTACGTGGGTCGCACGAAGGAAAAATCTATGATGCACGTTCCAAGGTTACTCAAGGGGTTATGGATTCAATGGTTCAGTTCTCAAGCGCTGAAAGCTTTTGGAAGGGACTGGACGGCAATTGGGCACAAATGAGATATCCTACAGATCATACATGTGTGGCAGGCTTACCAGTTGAGGACTGTGGCAGAGTTGCAGCGATAATGACACACAGTATTTTACCGTGCTATAAGATAACCTGCCCTACCTGTGCCCAACAATATGCCAACTTGCCAGCCAGTGACTTGCTTAAGATATTACACAAGCACGCAAGTGATGGTTTAAATCGATTGGGGGCAGACAAAGATCGCTTTGTGCATGTCAAAAAGTTCTTGACAATCTTAGAGCACTTAACTGAACCGGTTGATCTGAGTCTAGAAATTTTCAATGAAGTATTCAAGTCTATAGGGGAGAAGCAACAATCACCTTTCAAAAACCTGAATATTCTGAATAATTTCTTTTTGAAAGGAAAGGAAAATACAGCTCGTGAATGGCAGGTGGCTCAATTAAGCTTACTTGAATTGGCAAGATTCCAAAAGAACAGAACGGATAATATCAAGAAGGGAGACATCTCGTTCTTTAGGAATAAACTATCTGCCAAAGCAAATTGGAACTTGTATCTGTCATGTGATAACCAGCTGGATAAGAATGCAAACTTCCTGTGGGGACAGAGAGAATATCATGCTAAGCGATTTTTCTCGAACTATTTCGAGGAAATTGATCCAGCGAAGGGCTATTCAGCATACGAAAATCGTTTGCATCCGAATGGGACAAGAAAACTTGCAATTGGAAACCTAATTGTACCACTTGATCTGGCTGAGTTTAGGCGGAAGATGAAAGGTGATTATAAAAGACAGCCAGGGGTGAGTAAGAAGTGCACGAGCTCGAAGGATGGAAACTACGTGTATCCCTGGTGGTGCACTACACTTGATGATGGCTCACCTGTTGAATCAACATTTTACCCGCCAACTAAAAAGCACCTCGTAATAGGTAATAGTGGCGATCAGAAGTATGTTGACTTACCAAAAGGGAATTCTGAGATGTTATATATTGCCAGGCAAGGTTTCTGTTACATTAACATTTTCCTCGCGATGTTGATTAACATTAGTGAGGAAGATGCAAAGGATTTCACTAAGAAGGTTCGCGACATGTGTGTGCCAAAGCTTGGAACCTGGCCAACCATGATGGATCTGGCTACAACTTGTGCTCAAATGAAAATATTCTACCCTGATGTTCATGATGCAGAACTGCCTAGAATACTAGTCGATCACGAAACGCAGACATGCCATGTGGTTGACTCGTTTGGCTCACAAACAACTGGGTATCATATTTTGAAAGCATCTAGCGTGTCCCAACTTATTTTGTTTGCTAATGATGAGTTGGAGTCTGACATTAAGCACTATAGAGTTGGTGGTATTCCTAATGCATGCCCTGAACTTGGGTCTACAAT-ATCACCTTTCAGAGAAGGAGGAGTTATAATGTCTGAGTCGGCAGCGCTGAAACTGCTTTTGAAGGGAATTTTTAGACCTAAGGTGATGAGACAGTTGCTGTTAGATGAGCCTTACCTGTTGATTCTATCAATATTATCCCCTGGCATACTGATGGCTATGTACAATAATGGGATTTTTGAACTTGCGGTAAGGTTGTGGATTAATGAGAAACAATCCATAGCTATGATAGCATCGCTACTATCAGCTTTAGCCCTACGAGTGTCAGCGGCAGAAACACTCGTCGCACAGAGGATCATAATTGATACTGCAGCCACAGATCTCCTTGATGCTACGTGCGATGGGTTCAACCTACATCTAACGTACCCCACTGCGTTGATGGTGTTGCAAGTTGTTAAGAATAGAAATGAATGTGATGATACCCTATTCAAGGCGGGTTTTCCAAGTTACAACACGAGCGTCGTACAGATCATGGAAAAAAATTATCTAAATCTCTTGAACGATGCTTGGAAAGATTTAACTTGGCGGGAAAAATTATCCGCAACATGGTACTCATACAGAGCAAAACGCTCTATCACTCGGTACATAAAACCCACAGGAAGGGCAGATTTGAAAGGGTTATACAACATATCACCACAAGCATTCTTGGGCCGAGGCGCCCAGGTGGTCAAAGGCACTGCCTCAGGATTGAGCGAGCGATTTAATAATTATTTCAATACTAAGTGTGTGAATATTTCATCCTTTTTCATTCGTAGAATCTTTAGGCGTTTGCCAACTTTCGTCACTTTTGTTAACTCATTATTAGTTATTAGTATGTTAACCAGCGTAGTGGCAGTGTGTCAGGCAATAATTTTAGATCAGAGGAAGTATAGGAGAGAAATTGAGTTGATGCAGATAGAGAAGAATGAGATCGTCTGCATGGAGCTATATGCAAGTTTACAGCGCAAACTTGAACGCGATTTCACATGGGATGAGTACATTGAGTATTTGAAGTCAGTAAACCCTCAGATAGTTCAGTTTGCTCAAGCGCAGATGGAAGAATATGATGTGCGACACCAGCGTTCCACACCAGGTGTTAAAAATTTGGAACAAGTGGTGGCATTTATGGCTTTAGTCATCATGGTGTTCGATGCTGAAAGGAGTGATTGCGTGTTCAAAACTCTCAATAAATTTAAGGGTGTCCTTTCCTCACTGGACCATGAAGTTAGACATCAGTCCTTAAACGATGTGATCAAGAATTTTGATGAGAGGAATGAGACTATGGATTTTGAATTGAGTGAGGACACAATTCGAACATCATCAGTGCTAGATACAAAGTTTAGTGATTGGTGGGACCGACAAATCCAGATGGGACATACACTTCCACATTACAGAACCGAGGGGCACTTCATGGAATTCACAAGAGCAACTGCTGTCCAAGTGGCTAATGATATCGCCCACAGCGAACACCTAGACTTTCTAGTAAGGGGAGCTGTTGGGTCTGGAAAGTCAACTGGGTTGCCTGTTCATCTTAGTGTAGCCGGATCTGTGCTTTTAATTGAACCAACGCGACCACTAGCGGAGAACGTTTTCAAACAGCTATCTAGTGAACCATTCTTCAAGAAGCCAACACTGCGTATGCGTGGAAATAGTATATTTGGCTCTTCTCCAATCTCCGTCATGACTAGCGGATTTGCGCTACACTACTTCGCCAATAATCGCTCTCAATTAGCTCAGTTCAACTTTGTGATATTTGATGAGTGCCATGTTCTGGATCCTTCCGCAATGGCGTTCCGCAGTCTGCTGAGTGTTTATCATCAAGCATGCAAAGTATTAAAAGTGTCAGCTACTCCAGTGGGAAGAGAGGTTGAATTTACAACACAGCAACCAGTCAAGTTAATAGTGGAGGACACACTGTCTTTCCAATCATTTGTTGATGCACAAGGTTCTAAAACTAATGCTGATGTTGTTCAGTTTGGTTCAAACGTACTTGTGTACGTGTCGAGCTACAATGAAGTTGACACCTTGGCTAAGCTCCTAACAGACAAAAATATGATGGTCACAAAGGTTGATGGCAGAACAATGAAGCACGGTTGCCTAGAAATTGTCACAAAAGGAACCAGTGCGAGACCACATTTTGTTGTAGCAACCAACATAATTGAGAATGGAGTGACTTTGGACATAGACGTGGTTGTAGATTTTGGGTTGAAAGTCTCACCGTTCTTGGACATTGACAATAGGAGCATTGCTTACAATAAGGTGAGTGTTAGCTATGGTGAGAGAATTCAAAGGCTGGGTCGTGTTGGACGCTTCAAGAAAGGAGTAGCATTGCGCATTGGACACACTGAGAAGGGAATTATTGAAATTCCAAGCATGATCGCTACAGAGGCGGCTCTTGCTTGCTTTGCATATAACTTGCCAGTGATGACAGGAGGCGTCTCAACTAGTCTGATTGGCAATTGTACTGTGCGCCAAGTTAAAACAATGCAGCAATTTGAATTGAGTCCCTTCTTTATCCAGAATTTCGTTGCCCACGATGGATCAATGCATCCTGTCATACATGACATTCTTAAAAAGTATAAACTTCGAGATTGTATGACACCTTTGTGCGATCAGTCTATACCATACAGGGCATCGAGCACTTGGTTATCGGTTAGTGAATATGAGCGACTTGGAGTGGCCTTAGAAATTCCAAAGCAAGTCAAAATTGCATTCCATATCAAAGAGATCCCTCCTAAGCTCCACAAAATGCTTTGGGAAACGGTTGTCAAGTACAAAGACGTTTGCTTATTTCCAAGCATT-CGAGCATCGTCCATCAGCAAAATCGCATACACATTGCGCACAGACCTCTTCGCCATTCCAAGAACTCTAATATTGGTGGAGAGACTGCTTGAAGAGGAGCGAGTGAAGCAGAGCCAATTCAGAAGTCTCATCGACGAAGGATGCTCAAGCATGTTTTCAATTGTCAACTTGACAAACACTCTCAGAGCTAGATATGCAAAAGATTACACCGCAGAGAATATACAAAAACTTGAGAAAGTGAGAAGTCAATTGAAAGAATTCTCAAATTTGGATGGTTCTGCATGTGAGGAAAATTTAATAAAGAGGTATGAGTCTTTGCAGTTCGTTCATCACCAAGTTGCGACGTCACTTGCAAAGGATCTCAAGTTGAAGGGGACTTGGAAGAAGTCATTAGTGGCCAAAGATTTGATTATAGCAGGCGCTGTTGCAATTGGTGGAATAGGACTCATATATAGTTGGTTCACACAATCAGTTGAGACTGTGTCTCACCAAGGGAAAAATAAATCTAAAAGAATTCAAGCCTTGAAGTTTCGCCATGCTCGTGACAAAAGGGCTGGCTTTGAAATTGACAACAATGATGACACAATAGAGGAATTCTTTGGATCTGCATACAGGAAGAAGGGAAAAGGTAAAGGCACCACTGTTGGTATGGGCAAGTCAAGCAGGAGGTTTGTTAATATGTATGGATTTGACCCAACAGAATATTCATTCATCCAGTTCGTTGATCCGCTCACTGGAGCTCAAATTGAAGAGAACATCTATGCTGATATTAGAGACATCCAAGAGCGCTTTAGTGATGTCCGCAAGAAAATGGTAGAGGATGATGAAATCGAATTGCAAGCATTGGGCAGCAACACAACCATTCATGCTTACTTCAGGAAAGATTGGTCTGACAAGGCTCTAAAAATTGATTTGATGCCACACAACCCACTCAAAATCTGTGATAAATCGAATGGCATTGCTAAGTTTCCTGAAAGAGAACTTGAGTTGAGACAAACTGGGCCAGCAATAGAGGTTGATGTGAAAGACATTCCAAAACAGGAAGTGGAGCATGAAGCCAAATCACTCATGAGAGGTTTAAGGGATTTCAATCCAATTGCTCAAACAGTTTGCAGAGTAAAAGTGTCTGTTGAATATGGAACGTCTGAAATGTATGGGTTCGGTTTTGGTGCGTATATTATAGTAAACCACCATCTATTCAAGAGTTTCAATGGATCCATGGAAGTGCGATCAATGCATGGAACATTCAGAGTGAAGAATTTGCATAGCTTGAGCGTTTTACCGATCAAAAGCAGAGACATTATCATCATAAAGAAAACAAAAGATTTCCCTGTTTTCCCACAAAAACTGCACTTCCGAGCTGCAGTGCAGAATGAGAGGATTTGTTTGGTTGGAACTAATTTTCAAGAAAAACATGCATCATCAATCATCACAGAAACGAGTACTACATACAATGTACCGGGCAGCACTTTTTGGAAGCATTGGATTGAAACAAATGATGGGCATTGTGGATTACCAGTAGTGAGTACAGCTGATGGATGTCTAGTTGGAATACACAGCTTGGCGAATAATGTGCAAACCACGAATTATTATTCAGCCTTTGATGAGGATTTTGAAAGTAAGTATCTCCGAACTAATGAGCATAATGAGTGGACCAAATCGTGGGTTTATAACCCAGATACTGTGTTGTGGGGTCCATTGAAGCTCAAGGAGAGTACCCCTAAAGGCCTGTTTAAGACAACAAAACTTGTACAGGATTTAAT------TGATCATGATGTTGTTGTAGAGCAAGCTAAACATTCTGCGTGGATGTATGAGGCTCTAACAGGGAATTTGCAAGCTGTGGCGACAATGAAGAGTCAGCTGGTGACAAAGCACGTGGTCAAAGGGGAGTGTCGGCACTTCAAAGAGTTCTTAACTGTGGATTCGGAAGCAGAAGCT------TTCTTCAGGCCTTTGATGGATGCTTATGGGAAGAGCTTGTTAAATAGAGAAGCATATATAAAGGACATAATGAAATACTCAAAGCCTATTGATGTTGGAACAGTAGACTGTGAT--GCTTTTGAAGAGGCTATCAATAGGGTTATCATTTATCTGCAA-GTGCATGGCTTCCAGAAATGCAATTACATCACCGATGAGCAGGAAATTTTCAAAGCTCTCAATATGAAAGCTGCTGTCGGAGCTATGTATGGAGGCAAGAAGAAAGACTACTTCGAGCATTTTACTGAGGCGGATAAAGAGGAAATTGTTATGCAAAGTTGCCTTCGATTGTACAAGGGCTCGCTTGGCATATGGAATGGATCGTTGAAAGCAGAACTTCGGTGCAAAGAGAAGATACTTGCAAATAAGACAAGGACATTCACTGCTGCACCTTTAGATACTCTACTGGGTGGAAAGGTGTGCGTTGATGATTTTAATAATCAATTCTACTCGAAGAACATTGAATGCTGCTGGACTGTTGGAATGACTAAGTTTTATGGAGGTTGGGACAAATTGCTTCGGCGTCTACCTGAAAATT---GGGTGTACTGCGATGCCGATGGTTCACAATTCGATAGTTCACTCACCCCATACCTAATTAATGCTGTTCTCATCATCAGAAGCACATACATGGAAGATTGGGACTTGGGGTTGCAAATGTTGCGCAATTTGTACACAGAAATAATTTACACACCAATCTCAACTCCAGATGGAACAATTGTCAAGAAGTTTAGAGGTAATAATAGCGGTCAACCTTCTACCGTTGTGGATAATTCTCTCATGGTTGTCCTTGCTATGCATTACGCTCTCATTAAGGAGTGCGTTGAGTTTGAAGAAATCGACAGCACGTGTGTATTCTTTGTTAATGGTGATGATTTATTGATTGCTGTGAACCCGGAGAAAGAGAGCATTCTCGATAGAATGTCACAACATTTCTCAGATCTTGGTTTGAACTATGATTTTTCGTCGAGAACAAGAAGGAAGGAGGAATTGTGGTTCATGTCCCATAGAGGCCTGCTAATCGAGGGTATGTACGTGCCAAAGCTTGAAGAAGAGAGAATTGTATCCATTTTGCAATGGGATAGAGCTGATCTGCCAGAAAACAGATTAGAAGCGATTTGTGCAGCAATGATAGAATCCTGGGGTTATTTTGAGTTAACGCACCAAATCAGGAGATTCTACTCATGGTTGTTGCAACAGCAACCTTTTTCAACGATAGCACAGGAAGGAAAAGCTCCATACATAGCGAGCATGGCATTGAAGAAGCTGTACATGGATAGGACAGTAGATGAGGAGGAACTGAAGGCTTTCACTGAAATGATG?GTTGCCTTGGATGATGAACTTGAGTGCGATACTTATGAAGTGCACCATCAAGGAAAT---------GACACAATCGATGCAGGAGGAAGCACTAAGAAGGATGCAAAACAAGAGCAAGGTAGCATTCAACCAAATCTCAACAAGGAAAAG---------------------------GAAAAGGACGTGAATGTTGGAACATCTGGAACTCATACTGTGCCACGAATTAAAGCTATCACGTCCAAAATGAGAATGCCCAAGAGTAAAGGTGCAACTGTACTAAATTTGGAACACTTACTCGAGTATGCTCCACAGCAAATTGACATCTCAAATACTCGAGCAACTCAATCACAGTTTGATACGTGGTATGAAGCGGTACAACTTGCATACGACATAGGAGAAACTGAAATGCCAACTGTGATGAATGGGCTTATGGTTTGGTGCATTGAAAATGGAACCTCGCCAAACATCAACGGAGTTTGGGTTATGATGGATGGAGATGAACAAGTCGAATACCCACTGAAACCAATCGTTGAGAATGCAAAACCAACACTTAGGCAAATCATGGCACATTTCTCAGATGTTGCAGAAGCGTATATAGAAATGCGCAACAAAAAGGAACCATATATGCCACGATATGGTTTAGTTCGTAATCTGCGCGATGGAAGTTTGGCTCGCTATGCTTTTGACTTTTATGAGGTCACATCACGAACACCAGTGAGGGCTAGGGAAGCGCACATTCAAATGAAGGCCGCAGCATTGAAATCAGCCCAATCTCGACTTTTCGGGTTGGACGGTGGCATCAGTACACAAGAGGAGAACACAGAGAGGCACACCACCGAGGATGTCTCTCCAAGTATGCATACTCTACTTGGAGTCAAGAACATGTGATTGTAGTGTCTCTCCGGACGATATATAAGTATTTACA-TATGCAGTAAGTATTTTGGCTTTTCCTGTACTACTTTTATCATAATTAATAATCAGTTTGAATATTACTAATAGATAGAGGTGGCAGGGTGATTTCGTCATTGT-GGTGACTCTATCTTTTAATTCCGCATTATT-------------------------------------------------------------------------------------------------------------------------------------------------------------------------------------------------------------------------------------AAGTCTTAGATAAAAGTGCCGGGTTGTCGTTGTTGTGGATGATTCATCGATTAGGTGATGTTGCGATTCTGTCGTA???????????????????????????????????????????????????????????????????????????????????
	PVYNTN24_1   ???????????????????????????????????????????????????????????????????????????????????????????????????????????????????????????????????????????????????????????????????????????????????????????????????????????????????????????????????TGAATGCAAACTTCCATACTCACCCGCTCCTTTTGGGCTAGTTGCGGGGAAACGAGAAGTTTCAACC-------------------------------------------------------------------------------------------------------------------------------------------------------------------------------------------------------------------------------------------------------------------------------------------------------------------------------------------------------------------------------------------------------------------------------------------------------------------------------------------------------------------------------------------------------------------------------------------------------------------------------------------------------------------------------------------------------------------ACCACTGACCCCTTCGCAAGTTTGGAGATGCAGCTTAGTGCGCGATTACGAAGGCAAGAGTTTGCAACTATTCGAACATCCAAGAATGGTACTTGCATGTATCGATACAAGACTGATGTCCAGATTGCGCGCATTCAAAAGAAGCGCGAGGAGAGAGAAAGAGAGGAATATAATTTCCAAATGGCTGCGTCAAGTGTTGTGTCGAAGATCACTATTGCTGGTGGAGAGCCACCTTCAAAACTTGAATCACAAGTGCGGAGGGGTGTCATCCACACAACTCCAAGGATGCGCACAGCAAAAACATATCACACGCCAAAGTTGACAGAGGGACAAATGAACCACCTTATCAAGCAGGTGAAGCAAATTATGTCAACCAAAGGAGGGTCTGTTCAACTGATTAGCAAGAAAAGTACCCATGTTCACTATAAAGAAGTTTTGGGATCACATCGCGCAGTTGTTTGCACTGCA?CACATGAGAGGTTTACGAAAGAGAGTGGACTTTCGGTGTGATAAATGGACCGTTGTGCGTCTACAGCATCTCGCCAGGACGGACAAGTGGACTAACCAAGTTCGTGCTACTGATCTACGCAAGGGCGATAGTGGAGTTATATTGAGTAATACTAATCTCAAAGGAAACTTTGGAAGAAGCTCGGAAGGCTTATTCATAGTGCGTGGGTCGCACGAAGGAAAAATCTATGATGCACGTTCCAGGGTTACTCAAGGGGTTATGGATTCAATGGTTCAGTTCTCAAGCGCTGAAAGCTTTTGGAAGGGATTGGACGGCAATTGGGCACAAATGAGATATCCTACAGATCATACATGTGTGGCAGGCTTACCAGTTGAGGACTGTGGCAGAGTTGCAGCGATAATGACACACAGTATTTTACCGTGCTATAAGATAACCTGCCCTACCTGTGCCCAACAATATGCCAACTTGCCAGCCAGTGACTTACTTAAGATACTACACAAGCACGCAAGTGATGGTTTAAATCGATTGGGGGCAGACAAAGATCGCTTTGTGCATGTCAAAAAGTTCTTGACAATCTTAGAGCACTTAACTGAACCGGTTGATCTGAGTCTAGAAATTTTCAATGAAGTATTCAAGTCTATAGGGGAGAAGCAACAATCACCTTTCAAAAACCTGAATATTCTGAATAATTTCTTTTTGAAAGGAAAGGAAAATACAGCTCGTGAATGGCAGGTGGCTCAATTAAGCTTACTTGAATTGGCAAGATTCCAGAAGAACAGAACGGATAATATCAAGAAAGGAGACATCTCGTTCTTTAGGAATAAACTATCTGCCAAAGCAAATTGAAACTTGTATCTGTCATGTGATAACAAGCTGGATAAGAATGCAAATTTCCTGTGGGGACAGAGAGAATATCATGCTAAGCGATTTTTCTCGAACTATTTCGAGGAAATTGATCCAGCGAAGGGCTATTCAGCATACGAAAATCGTTTGCATCCGAATGGGACAAGAAAACTTGCAATTGGAAACCTAATTGTACCACTTGATCTGGCTGAGTTTAGGCGGAAGATGAAAGGTGATTATAAAAGACAGCCAGGGGTGAGTAAGAAGTGCACGAGCTCGAAGGATGGAAACTACGTGTATCCCTGGTGGTGCACTACACTTGATGATGGCTCACCTGTTGAATCAACATTTTACCCGCCAACTAAAAAGCACCTCGTAATAGGTAATAGTGGCGATCAAAAGTATGTTGACTTACCAAAAGGGAATTCTGAGATGTTATATATTGCCAGGCAAGGTTTCTGTTACATTAACATTTTCCTCGCGATGTTGATTAACATTAGTGAGGAAGATGCAAAGGACTTCACTAAGAAGGTTCGTGACATGTGTGTGCCAAAGCTTGGAACCTGGCCAACCATGATGGATCTGGCTACAACTTGTGCTCAAATGAAAATATTCTACCCTGATGTTCATGATGCAAAACTGCCTAGAATACTAGTCGATCACAAAACGCAAACATGCCATGTGGTTGACTCGTTTGGCTCACAAACAACTGGGTATCATATTTTGAAAGCGTCTAGCGTGTCCCAACTTATTTTGTTTGCTAATGATGAGTTGGAGTCTGACATTAAGCACTATAGAGTTGGTGGTATTCCTAATGCATGCCCTGAACTTGGGTCTACAAT-ATCACCTTTCAGAGAAGGAGGAGTTATAATGTCTGAGTCGGCAGCGCTAAAACTGCTTTTGAAGGGAATTTTTAGACCTAAGGTGATGAGACAGTTGCTGTTAGATGAGCCTTACCTGTTGATTCTATCAATATTATCCCCTGGCATACTGATGGCTATGTACAATAATGGGATTTTTGAACTTGCGGTAAGGTTGTGGATTAATGAGAAACAATCCATAGCTATGATAGCATCGCTACTATCAGCTTTAGCTCTACGAGTGTCAGCGGCAGAAACACTTGTCGCACAGAGGATTATAATTGATACTGCAGCCACAGATCTCCTTGATGCTACGTGCGATGGGTTCAACCTACATCTAACGTACCCCACTGCGTTGATGGTGTTGCAAGTTGTTAAGAATAGAAATGAATGTGATGATACCCTATTCAAGGCGGGTTTTCCAAGTTACAACACGAGCGTCGTACAGATCATGGAAAAAAATTATCTAAATCTCTTGAACGATGCTTGGAAAGATTTAACTTGGCGGGAAAAATTATCCGCAACATGGTACTCATACAGAGCAAAACGCTCTATCACTCGGTACATAAAACCCACAGGAAGGGCAGATTTGAAAGGGTTATACAACATATCACCACAAGCATTCTTGGGCCGAGGCGCCCAGGTGGTCAAAGGCACTGCCTCAGGATTGAGCGAGCGATTTAATAATTATTTCAATACTAAGTGTGTGAATATTTCATCCTTTTTCATTCGTAGAATCTTTAGGCGTTTGCCAACTTTCGTCACTTTTGTTAACTCATTATTAGTTATTAGTATGTTAACCAGCGTAGTGGCAGTGTGTCAGGCAATAATTTTAGATCAGAGGAAGTATAGGAGAGAAATTGAGTTGATGCAGATAGAGAAGAATGAGATCGTCTGCATGGAGCTATATGCAAGTTTACAGCGCAAACTTGAACGCGATTTCACATGGGATGAGTACATTGAGTATTTGAAGTCAGTAAACCCTCAGATAGTTCAGTTTGCTCAAGCGCAGATGGAAGAATATGATGTGCGACACCAGCGTTCCACACCAGGTGTTAAAAATTTGGAACAAGTGGTAGCATTTATGGCTTTAGTCATCATGGTGTTCGATGCTGAAAGGAGTGATTGCGTGTTCAAAACTCTCAATAAATTTAAGGGTGTCCTTTCCTCACTGGACCATGAAGTTAGACATCAGTCCTTAGACGATGTGATCAAGAATTTTGATGAGAGGAATGAGACTATTGATTTTGAATTGAGTGAGGACACAATTCGAACATCATCAGTGCTAGATACAAAGTTTAGTGATTGGTGGGACCGACAAATCCAGATGGGACATACACTTCCACATTACAGAACCGAGGGGCACTTCATGGAATTCACAAGAGCAACTGCTGTCCAAGTGGCTAATGATATTGCCCACAGCGAACACCTAGACTTTCTAGTAAGGGGAGCTGTTGGGTCTGGAAAGTCAACTGGGTTGCCTGTTCATCTTAGTGTAGCCGGATCTGTGCTTTTAATTGAACCAACGCGACCACTAGCGGAGAATGTTTTCAAACAGCTATCTAGTGAACCATTCTTCAAGAAGCCAACACTGCGTATGCGTGGAAATAGTATATTTGGCTCTTCTCCAATCTCCGTCATGACTAGCGGATTTGCGCTACACTACTTCGCCAATAATCGCTCTCAATTAGCTCAGTTCAACTTTGTGATATTTGATGAGTGCCATGTTCTGGATCCTTCCGCAATGGCGTTCCGCAGTCTGCTGAGTGTTTATCATCAAGCATGCAAAGTATTAAAAGTGTCAGCTACTCCAGTGGGAAGAGAGGTTGAATTTACAACACAGCAACCAGTCAAGTTAATAGTGGAGGACACACTGTCTTTCCAATCATTTGTTGATGCACAAGGTTCTAAAACTAATGCTGATGTTGTTCAGTTTGGTTCAAACGTACTTGTGTACGTGTCGAGCTACAATGAAGTTGACACCTTGGCTAAGCTTCTAACAGACAAGAATATGATGGTCACAAAGGTTGATGGCAGAACAATGAAGCACGGTTGCCTAGAAATTGTCACAAAAGGAACCAGTGCGAGACCACATTTTGTTGTAGCAACCAACATAATTGAGAATGGAGTGACTTTGGACATAGACGTGGTTGTAGATTTTGGGTTGAAAGTCTCACCGTTCTTGGACATTGACAATAGGAGCATTGCTTACAATAAGGTGAGTGTTAGCTATGGTGAGAGAATTCAAAGGCTGGGTCGTGTTGGACGCTTCAAGAAAGGAGTAGCATTGCGCATTGGACACACTGAGAAGGGAATTATTGAAATTCCAAGCATGATCGCTACAGAGGCGGCTCTTGCTTGCTTTGCATATAACTTGCCAGTGATGACAGGAGGCGTCTCAACTAGTCTGATTGGCAATTGTACTGTGCGCCAAGTTAAAACAATGCAGCAATTTGAATTGAGTCCCTTCTTTATCCAGAATTTCGTTGCCCACGATGGATCAATGCATCCTGTCATACATGACATTCTTAAAAAGTATAAACTTCGAGATTGTATGACACCTTTGTGCGATCAGTCTATACCATATAGGGCATCGAGCACTTGGTTATCGGTTAGTGAATATGAGCGACTTGGAGTGGCCTTAGAAATTCCAAAGCAAGTCAAAATTGCATTCCATATCAAAGAGATCCCTCCTAAGCTCCACGAAATGCTTTGGGAAACGGTTGTCAAGTACAAAGACGTTTGCTTATTTCCAAGCATT-CGAGCATCGTCCATCAGCAAAATCGCATACACATTGCGTACAGACCTCTTCGCCATCCCAAGAACTCTAATATTGGTGGAGAGACTGCTTGAAGAGGAGCGAGTGAAGCAGAGCCAATTCAGAAGTCTCATCGACGAAGGATGCTCAAGCATGTTTTCAATTGTCAACTTGACAAACACTCTCAGAGCTAGATATGCAAAAGATTACACCGCAGAGAATATACAAAAACTTGAGAAAGTGAGAAGTCAATTGAAAGAATTCTCAAATTTGGATGGTTCTGCATGTGAGGAAAATTTAATAAAGAGGTATGAGTCTTTGCAGTTCGTTCATCACCAAGTTGCGACGTCACTTGCAAAGGATCTCAAGTTGAAGGGGACTTGGAAGAAGTCATTAGTGGCCAAAGATTTGATCATAGCAGGCGCTGTTGCAATTGGTGGAATAGGACTCATATATAGTTGGTTCACACAATCAGTTGAGACTGTGTCTCACCAAGGGAAAAATAAATCCAAAAGAATTCAAGCCTTGAAGTTTCGCCATGCTCGTGACAAAAGGGCTGGCTTTGAAATTGACAACAATGATGACACAATAGAGGAATTCTTTGGATCTGCATACAGGAAGAAGGGAAAAGGTAAAGGCACCACTGTTGGTATGGGCAAGTCAAGCAGGAGGTTTGTTAATATGTATGGATTTGACCCAACAGAATATTCATTCATCCAGTTCGTTGATCCGCTCACTGGAGCTCAAATTGAAGAGAACGTCTATGCTGATATTAGAGACATCCAAGAGCGCTTTAGTGATGTCCGCAAGAAAATGGTAGAGGATGATGAAATCGAATTGCAAGCATTGGGCAGCAACACAACCATTCATGCTTACTTCAGGAAAGATTGGTCTGACAAGGCTCTAAAAATTGATTTGATGCCACACAACCCACTCAAAATCTGTGATAAATCGAATGGCATTGCTAAGTTTCCTGAAAGAGAACTTGAGTTGAGACAAACTGGGCCAGCAATAGAGGTTGATGTGAAAGACATTCCAAAACAGGAAGTGGAGCATGAAGCCAAATCACTCATGAGAGGTTTAAGGGATTTCAATCCAATTGCTCAAACAGTTTGCAGAGTAAAAGTGTCTGTTGAATATGGAACGTCTGAAATGTATGGGTTCGGTTTTGGTGCGTATATTATAGTAAACCACCATCTATTCAAGAGTTTCAATGGATCCATGGAAGTGCGATCAATGCATGGAACATTCAGAGTGAAGAATTTGCATAGCTTGAGCGTTTTACCGATCAAAAGCAGAGACATTATCATCATAAAGAAAACAAAAGATTTCCCTGTTTTCCCACAAAAACTGCACTTCCGAGCTGCAGTGCAGAATGAGAGGATTTGTTTGGTTGGAACTAATTTTCAAGAAAAACATGCATCATCAATCATCACAGAAACGAGTACTACATACAATGTACCGGGCAGCACTTTTTGGAAGCATTGGATTGAAACAAATGATGGGCATTGTGGATTACCAGTAGTGAGTACAGCTGATGGATGTCTAGTTGGAATACACAGCTTGGCGAATAATGTGCAAACCACGAATTATTATTCAGCCTTTGATGAGGATTTTGAAAGTAAGTATCTCCGAACTAATGAGCATAATGAGTGGACCAAATCGTGGGTTTATAACCCAGATACTGTGTTGTGGGGTCCATTGAAGCTCAAGGAGAGTACCCCTAAAGGCCTGTTTAAGACAACAAAACTTGTACAGGATTTAAT------TGATCATGATGTTGTTGTAGAGCAAGCTAAACATTCTGCGTGGATGTATGAGGCTCTAACAGGGAATTTGCAAGCTGTGGCGACAATGAAGAGTCAGCTGGTGACAAAGCACGTGGTCAAAGGGGAGTGTCGGCACTTCAAAGAGTTCTTAACTGTGGATTCGGAAGCAGAAGCT------TTCTTCAGGCCTTTGATGGATGCTTATGGGAAGAGCTTGTTAAATAGAGAAGCATATATAAAGGACATAATGAAATACTCAAAGCCTATTGATGTTGGAACAGTAGACTGTGAT--GCTTTTGAAGAGGCTATCAATAGGGTTATCATTTATCTGCAA-GTGCATGGCTTCCAGAAATGCAATTACATCACCGATGAGCAGGAAATTTTCAAAGCTCTCAATATGAAAGCTGCTGTCGGAGCTATGTATGGAGGCAAGAAGAAAGACTACTTCGAGCATTTTACTGAGGCGGATAAAGAGGAAATTGTTATGCAAAGTTGCCTTCGATTGTACAAGGGCTCGCTTGGCATATGGAATGGATCGTTGAAAGCAGAACTTCGGTGCAAAGAGAAGATACTTGCAAATAAGACAAGGACATTCACTGCTGCACCTTTAGATACTCTACTGGGTGGAAAGGTGTGCGTTGATGATTTTAACAATCAATTCTACTCGAAGAACATTGAATGCTGCTGGACTGTTGGAATGACTAAGTTTTATGGAGGTTGGGACAAATTGCTTCGGCGTCTACCTGAAAATT---GGGTGTACTGCGATGCCGATGGTTCACAATTCGATAGTTCACTCACCCCATACCTAATTAATGCTGTTCTCATCATCAGAAGCACATACATGGAAGATTGGGACTTGGGGTTGCAAATGTTGCGCAATTTGTACACAGAAATAATTTACACACCAATCTCAACTCCAGATGGAACAATTGTCAAGAAGTTTAGAGGTAATAATAGCGGTCAACCTTCTACCGTTGTGGATAATTCTCTCATGGTTGTCCTTGCTATGCATTACGCTCTCATTAAGGAGTGCGTTGAGTTTGAAGAAATCGACAGCACGTGTGTATTCTTTGTTAATGGTGATGACTTATTGATTGCTGTGAATCCGGAGAAAGAGAGCATTCTCGATAGAATGTCACAACATTTCTCGGATCTTGGTTTGAACTATGATTTTTCGTCGAGAACAAGAAGGAAGGAGGAATTGTGGTTCATGTCCCATAGAGGCCTGCTAATCGAGGGTATGTACGTGCCGAAGCTTGAAGAAGAGAGAATTGTATCCATTTTGCAATGGGATAGAGCTGATCTGCCAGAAAACAGATTAGAAGCGATTTGTGCAGCAATGATAGAATCCTGGGGTTATTTTGAGTTAACGCACCAAATCAGGAGATTCTACTCATGGTTGTTGCAACAGCAACCTTTTTCAACGATAGCACAGGAAGGAAAAGCTCCATACATAGCGAGCATGGCATTGAAGAAGCTGTACATGGATAGGACAGTAGATGAGGAGGAACTGAAGGCTTTCACTGAAATGATG?GTTGCCTTGGATGATGAACTTGAGTGCGATACTTATGAAGTGCACCATCAAGGAAAT---------GACACAATCGATGCAGGAGGAAGCACTAAGAAGGATGCAAAACAAGAGCAAGGTAGCATTCAACCAAATCTCAACAAGGAAAAG---------------------------GAAAAGGACGTGAATGTTGGAACATCTGGAACTCATACTGTGCCACGAATTAAAGCTATCACGTCCAAAATGAGAATGCCCAAGAGTAAAGGTGCAACTGTACTAAATTTGGAACACTTACTCGAGTATGCTCCACAGCAAATTGACATCTCAAATACTCGAGCAACTCAATCACAGTTTGATACGTGGTATGAAGCGGTACAACTTGCATACGACATAGGAGAAACTGAAATGCCAACTGTGATGAATGGGCTTATGGTTTGGTGCATTGAAAATGGAACCTCGCCAAACATCAACGGAGTTTGGGTTATGATGGATGGAGATGAACAAGTCGAATACCCACTGAAACCAATCGTTGAGAATGCAAAACCAACACTTAGGCAAATCATGGCACATTTCTCAGATGTTGCAGAAGCGTATATAGAAATGCGCAACAAAAAGGAACCATATATGCCACGATATGGTTTAGTTCGTAATCTGCGCGATGGAAGTTTGGCTCGCTATGCTTTTGACTTTTATGAGGTCACATCACGAACACCAGTGAGGGCTAGGGAAGCGCACATTCAAATGAAGGCCGCAGCATTGAAATCAGCCCAATCTCGACTTTTCGGGTTGGACGGTGGCATCAGTACACAAGAGGAGAACACAGAGAGGCACACCACCGAGGATGTCTCTCCAAGTATGCATACTCTACTTGGAGTCAAGAACATGTGATTGTAGTGTCTCTCCGGACGATATATAAGTATTTACA-TATGCAGTAAGTATTTTGGCTTTTCCTGTACTACTTTTATCATAATTAATAATCAGTTTGAATATTACTAATAGATAGAGGTGGCAGGGTGATTTCGTCATTGT-GGTGACTCTATCTTTTAATTCCGCATTATT-------------------------------------------------------------------------------------------------------------------------------------------------------------------------------------------------------------------------------------AAGTCTTAGATAAAAGTGCCGGGTTGTCGTTGTTGTGGATGATTCATCGATTAGGTGATGTTGCGATTCTGTCGTA???????????????????????????????????????????????????????????????????????????????????
	HR1          ?AATTAAAACAACTCAATACAACATAAGAAAATCAACGCAAAAACACTCACAAAAGCTTTCAACTCTAATTCAAACAATTTGATAAGTTTCAATTTCGATTTTCATCAAACAAACTCTTTCAATTTCAGTGTAAGCTATCGTAATTCAGTAAGTTATTTCAAACTCTCGTAAATTGCAGAAGATCGTCCATGGCAACTTACACATCAACAATCCAGTTTGGTTCCATTGAATGCAAACTTCCATACTCACCCGCTCCTTTTGGGCTAGTTGCGGGGAAACGAGAAGTTTCAACC-------------------------------------------------------------------------------------------------------------------------------------------------------------------------------------------------------------------------------------------------------------------------------------------------------------------------------------------------------------------------------------------------------------------------------------------------------------------------------------------------------------------------------------------------------------------------------------------------------------------------------------------------------------------------------------------------------------------ACCACTGACCCCTTCGCAAGTTTGGAGATGCAGCTTAGTGCGCGATTACGAAGGCAAGAGTTTGCAACTATTCGAACATCCAAGAATGGTACTTGCATGTATCGATACAAGACTGATGTCCAGATTGCGCGCATTCAAAAGAAGCGCGAGGAGAGAGAAAGAGAGGAATATAATTTCCAAATGGCTGCGTCAAGTGTTGTGTCGAAGATCACTATTGCTGGTGGAGAGCCACCTTCAAAACTTGAATCACAAGTGCGGAGGGGTGTCATCCACACAACTCCAAGGATGCGCACAGCAAAAACATATCACACGCCAAAGTTGACAGAGGGACAAATGAACCACCTTATCAAGCAGGTGAAGCAAATTATGTCGACCAAAGGAGGGTCTGTTCAACTGATTAGCAAGAAAAGTACCCATGTTCACTATAAAGAAGTTTTGGGATCACATCGCGCGGTTGTTTGCACTGCA?CACATGAGAGGTTTACGAAAGAGAGTGGACTTTCGGTGTGACAAATGGACCGTTGTGCGTCTACAGCATCTCGCCAGGACGGACAAGTGGACTAACCAAGTTCGTGCTACTGATCTACGCAAGGGCGATAGTGGAGTTATATTGAGTAATACTAATCTCAAAGGAAACTTTGGAAGAAGCTCGGAGGGCCTATTCATAGTGCGTGGGTCGCACGAAGGAAAAATCTATGATGCACGTTCCAAGGTTACTCAAGGGGTTATGGATTCAATGGTTCAGTTCTCAAGCGCTGAAAGCTTTTGGAAGGGATTGGACGGCAATTGGGCACAAATGAGATATCCTACAGATCATACATGTGTGGCAGGCTTACCAGTTGAGGACTGTGGCAGAGTTGCAGCGATAATGACACACAGTATTTTACCGTGCTATAAGATAACCTGCCCTACCTGTGCCCAACAATATGCCAACTTGCCAGCCAGTGACTTACTTAAGATATTACACAAGCACGCAAGTGATGGTTTAAATCGATTGGGGGCAGACAAAGATCGCTTTGTGCATGTCAAAAAGTTCTTGACAATCTTAGAGCACTTAACTGAACCGGTTGATCTGAGTCTAGAAATTTTCAATGAAGTATTCAAGTCTATAGGGGAGAAGCAACAATCACCTTTCAAAAACCTGAATATTCTGAATAATTTCTTTTTGAAAGGAAAGGAAAATACAGCTCGTGAATGGCAGGTGGCTCAATTAAGCTTACTTGAATTGGCAAGATTCCAAAAGAACAGAACGGATAATATCAAGAAAGGAGACATCTCGTTCTTTAGGAATAAACTATCTGCCAAAGCAAATTGGAACTTGTATCTGTCATGTGATAACCAGCTGGATAAGAATGCAAACTTCCTGTGGGGACAGAGAGAATATCATGCTAAGCGATTTTTCTCGAACTATTTCGAGGAAATTGATCCAGCGAAGGGCTATTCAGCATACGAAAATCGTTTGCATCCGAATGGGACAAGAAAACTTGCAATTGGAAACCTAATTGTACCACTTGATCTGGCTGAGTTTAGGCGGAAGATGAAAGGTGATTATAAAAGACAGCCAGGGGTGAGTAAGAAGTGCACGAGCTCGAAGGATGGAAACTACGTGTATCCCTGTTGTTGCACTACACTTGATGATGGCTCAGCTGTTGAATCAACATTTTACCCGCCAACTAAGAAGCACCTCGTAATAGGTAATAGTGGCGATCAAAAGTATGTTGACTTACCAAAAGGGAATTCTGAGATGTTATATATTGCCAGGCAAGGTTTCTGTTACATTAACATTTTCCTCGCGATGTTGATTAACATTAGTGAGGAAGATGCAAAGGATTTCACTAAGAAGGTTCGTGACATGTGTGTGCCAAAGCTTGGAACCTGGCCAACCATGATGGATCTGGCTACAACTTGTGCTCAAATGAAAATATTCTACCCTGATGTTCATGATGCAGAACTGCCTAGAATACTAGTCGATCACGAAACGCAGACATGCCATGTGGTTGACTCGTTTGGCTCACAAACAACTGGGTATCATATTTTGAAAGCATCTAGCGTGTCCCAACTTATTTTGTTTGCTAATGATGAGTTGGAGTCTGACATTAAGCACTATAGAGTTGGTGGTATTCCTAATGCATGCCCTGAACTTGGGTCTACAAT-ATCACCTTTCAGAGAAGGAGGAGTTATAATGTCTGAGTCGGCAGCGCTGAAACTGCTTTTGAAGGGAATTTTTAGACCTAAGGTGATGAGACAGTTGCTGTTAGATGAGCCTTACCTGTTGATTCTATCAATATTATCCCCTGGCATACTGATGGCTATGTACAATAATGGGATTTTTGAACTTGCGGTAAGGTTGTGGATTAATGAGAAACAATCCATAGCTATGATAGCATCGCTACTATCAGCTTTAGCCCTACGAGTGTCAGCGGCAGAAACACTCGTCGCACAGAGGATTATAATTGATACTGCAGCCACAGATCTCCTTGATGCTACGTGCGATGGGTTCAACCTACATCTAACGTACCCCACTGCGTTGATGGTGTTGCAAGTTGTTAAGAATAGAAATGAATGTGATGATACCCTATTCAAGGCGGGTTTTCCAAGTTACAACACGAGCGTCGTACAGATCATGGAAAAAAATTATCTAAATCTCTTGAACGATGCTTGGAAAGATTTAACTTGGCGGGAAAAATTATCCGCAACATGGTACTCATACAGAGCAAAACGCTCTATCACTCGGTACATAAAACCCACAGGAAGGGCAGATTTGAAAGGGTTATACAACATATCACCACAAGCATTCTTGGGCCGAGGCGCCCAGGTGGTCAAAGGCACTGCCTCAGGATTGAGCGAGCGATTTAATAATTATTTCAATACTAAGTGTGTGAATATTTCATCCTTTTTCATTCGTAGAATCTTTAGGCGTTTGCCAACTTTCGTCACTTTTGTTAACTCATTATTAGTTATTAGTATGTTAACCAGCGTAGTGGCAGTGTGTCAGGCAATAATTTTAGATCAGAGGAAGTATAGGAGAGAAATTGAGTTGATGCAGATAGAGAAGAATGAGATCGTCTGCATGGAGCTATATGCAAGTTTACAGCGCAAACTTGAACGCGATTTCACATGGGATGAGTACATTGAGTATTTGAAGTCAGTAAACCCTCAGATAGTTCAGTTTGCTCAAGCGCAGATGGAAGAATATGATGTGCGACACCAGCGTTCCACACCAGGTGTTAAAAATTTGGAACAAGTGGTAGCATTTATGGCTTTAGTCATCATGGTGTTCGATGCTGAAAGGAGTGATTGCGTGTTCAAAACTCTCAATAAATTTAAGGGTGTCCTTTCCTCACTGGACCATGAAGTTAGACATCAGTCCTTAGACGATGTGATCAAGAATTTTGATGAGAGGAATGAGACTATTGATTTTGAATTGAGTGAGGACACAATTCGAACATCATCAGTGCTAGATACAAAGTTTAGTGATTGGTGGGACCGACAAATCCAGATGGGACATACACTTCCACATTACAGAACCGAGGGGCACTTCATGGAATTCACAAGAGCAACTGCTGTCCAAGTGGCTAATGATATCGCCCACAGCGAACACCTAGATTTTCTAGTAAGGGGAGCTGTTGGGTCTGGAAAGTCAACTGGGTTGCCTGTTCATCTTAGTGTAGCCGGATCTGTGCTTTTAATTGAACCAACGCGACCACTAGCGGAGAACGTTTTCAAACAGCTATCTAGTGAACCATTCTTCAAGAAGCCAACACTGCGTATGCGTGGAAATAGTATATTTGGCTCTTCTCCAATCTCCGTCATGACTAGCGGATTTGCGCTACACTACTTCGCCAATAATCGCTCTCAATTAGCTCAGTTCAACTTTGTGATATTTGATGAATGCCATGTTCTGGATCCTTCCGCAATGGCGTTCCGCAGTCTGCTGAGTGTTTATCATCAAGCATGCAAAGTATTAAAAGTGTCAGCTACTCCAGTGGGAAGAGAGGTTGAATTTACAACACAGCAACCAGTCAAGTTAATAGTGGAGGACACACTGTCTTTCCAATCATTTGTTGATGCACAAGGTTCTAAAACTAATGCTGATGTTGTTCAGTTTGGTTCAAACGTACTTGTGTACGTGTCGAGCTACAATGAAGTTGACACCTTGGCTAAGCTCCTAACAGACAAGAATATGATGGTCACAAAGGTTGATGGCAGAACAATGAAGCACGGTTGCCTAGAAATTGTCACAAAAGGAACCAGTGCGAGACCACATTTTGTTGTAGCAACCAACATAATTGAGAATGGAGTGACTTTGGACATAGACGTGGTTGTAGATTTTGGGTTGAAAGTCTCACCGTTCTTGGACATTGACAATAGGAGCATTGCTTACAATAAGGTGAGTGTTAGCTATGGTGAGAGAATTCAAAGGCTGGGTCGTGTTGGACGCTTCAAGAAAGGAGTGGCATTGCGCATTGGACACACTGAGAAGGGAATTATTGAAATTCCAAGCATGATCGCTACAGAGGCGGCTCTTGCTTGCTTTGCATATAACTTGCCAGTGATGACAGGAGGCGTCTCAACTAGTCTGATTGGCAATTGTACTGTGCGCCAAGTTAAAACAATGCAGCAATTTGAATTGAGTCCCTTCTTTATCCAGAATTTCGTTGCCCACGATGGATCAATGCATCCTGTCATACATGACATTCTTAAAAAGTATAAACTTCGAGATTGTATGACACCTTTGTGCGATCAGTCTATACCATACAGGGCATCGAGCACTTGGTTATCGGTTAGTGAATATGAGCGACTTGGAGTGGCCTTAGAAATTCCAAAGCAAGTCAAAATTGCATTCCATATCAAAGAGATCCCTCCTAAGCTCCACGAAATGCTTTGGGAAACGGTTGTCAAGTACAAAGACGTTTGCTTATTTCCAAGCATT-CGAGCATCGTCCATCAGCAAAATCGCATACACATTGCGTACAGATCTCTTCGCCATCCCAAGAACTCTAATATTGGTGGAGAGACTGCTTGAAGAGGAGCGAGTGAAGCAGAGCCAATTCAGAAGTCTCATCGACGAAGGATGCTCAAGCATGTTTTCAATTGTCAACTTGACAAACACTCTCAGAGCTAGATATGCAAAAGATTACACCGCAGAGAATATACAAAAACTTGAGAAAGTGAGAAGTCAATTGAAAGAATTCTCAAATTTGGATGGTTCTGCATGTGAGGAAAATTTAATAAAGAGGTATGAGTCTTTGCAGTTCGTTCATCACCAAGTTGCGACGTCACTTGCAAAGGATCTCAAGTTGAAGGGGACTTGGAAGAAGTCATTAGTGGCCAAAGATTTGATCATAGCAGGCGCTGTTGCAATTGGTGGAATAGGACTCATATATAGTTGGTTCACACAATCAGTTGAGACTGTGTCTCACCAAGGGAAAAATAAATCCAAAAGAATTCAAGCCTTGAAGTTTCGCCATGCTCGTGACAAAAGGGCTGGCTTTGAAATTGACAACAATGATGACACAATAGAGGAATTCTTTGGATCTGCATACAGGAAGAAGGGAAAAGGTAAAGGCACCACTGTTGGTATGGGCAAGTCAAGCAGGAGGTTTGTTAATATGTATGGATTTGACCCAACAGAATATTCATTCATCCAGTTCGTTGATCCGCTCACTGGAGCTCAAATTGAAGAGAACGTCTATGCTGATATTAGAGACATCCAAGAGCGCTTTAGTGATGTCCGCAAGAAAATGGTAGAGGATGATGAAATCGAATTGCAAGCATTGGGCAGCAACACAACCATTCATGCTTACTTCAGGAAAGATTGGTCTGACAAGGCTCTAAAAATTGATTTGATGCCACACAACCCACTCAAAATCTGTGATAAATCGAATGGCATTGCTAAGTTTCCTGAAAGAGAACTTGAGTTGAGACAAACTGGGCCAGCAATAGAGGTTGATGTGAAAGACATTCCAAAACAGGAAGTGGAGCATGAAGCCAAATCACTCATGAGAGGTTTAAGGGATTTCAATCCAATTGCTCAAACAGTTTGCAGAGTAAAAGTGTCTGTTGAATATGGAACGTCTGAAATGTATGGGTTCGGTTTTGGTGCGTATATTATAGTAAACCACCATCTATTCAAGAGTTTCAATGGATCCATGGAAGTGCGATCAATGCATGGAACATTCAGAGTGAAGAATTTGCATAGCTTGAGCGTTTTACCGATCAAAGGCAGAGACATTATCATCATAAAGATGCCAAAGGATTTCCCTGTTTTCCCACAAAAACTGCACTTCCGAGCTCCAGTGCAGAATGAGAGGATTTGTTTGGTTGGAACTAATTTTCAGGAAAAACATGCATCATCAATCATCACAGAAACGAGTACTACATACAATGTACCGGGCAGCACTTTTTGGAAGCATTGGATTGAAACAAATGATGGGCATTGTGGATTACCAGTAGTGAGTACAGCTGATGGTTGTCTAGTTGGAATACACAGCTTGGCGAATAATGTGCAAACCACGAATTATTATTCAGCCTTTGATGAGGATTTTGAAAGTAAGTATCTCCGAACTAATGAGCATAATGAGTGGACCAAATCGTGGGTATATAACCCAGATACTGTGTTGTGGGGTCCATTAAAGCTCAAGGAGAGTACCCCTAAAGGCCTGTTTAAGACAACAAAACTTGTACAGGATTTAAT------TGATCATGATGTTGTTGTAGAGCAAGCTAAACATTCTGCGTGGATGTATGAGGCTCTAACAGGGAATTTGCAAGCTGTGGCGACAATGAAGAGTCAGCTGGTGACAAAGCACGTGGTCAAAGGGGAGTGTCGGCACTTCAAAGAGTTCTTAAATGTGGATTCGGAAGCAGAAGCT------TTCTTCAGGCCTTTGATGGATGCTTATGGGAAGAGCTTGTTAAATAGAGAAGCATATATAAAGGACATAATGAAATACTCAAAGCCTATTGATGTTGGAACAGTAGACTGTGAT--GCTTTTGAAGAGGCTATCAATAGGGTTATCATTTATCTGCAA-GTGCATGGCTTCCAGAAATGCAATTACATCACCGATGAGCAGGAAATTTTCAAAGCTCTCAATATGAAAGCTGCTGTCGGAGCTATGTATGGAGGCAAGAAGAAAGACTACTTCGAGCATTTTACTGAGGCGGATAAAGAGGAAATTGTTATGCAAAGTTGCCTTCGATTGTACAAGGGCTCGCTTGGCATATGGAATGGATCGTTGAAGGCAGAACTTCGGTGCAAAGAGAAGATACTTGCAAATAAGACAAGGACATTCACTGCTGCACCTTTAGATACTCTACTGGGTGGAAAGGTGTGCGTTGATGATTTTAATAATCAATTCTACTCGAAGAACATTGAATGCTGCTGGACTGTTGGAATGACTAAGTTTTATGGAGGTTGGGACAAATTGCTTCGGCGTCTACCTGAAAATT---GGGTGTACTGCGATGCCGATGGTTCACAATTCGATAGTTCACTCACCCCATACCTAATTAATGCTGTTCTCATCATCAGAAGCACATACATGGAAGATTGGGACTTGGGGTTGCAAATGTTGCGCAATTTGTACACAGAAATAATTTACACACCAATCTCAACTCCAGATGGAACAATTGTCAAGAAGTTTAGAGGTAATAATAGCGGTCAACCTTCTACCGTTGTGGATAATTCTCTCATGGTTGTCCTTGCTATGCATTACGCTCTCATTAAGGAGTGCGTTGAGTTTGAAGAAATCGACAGCACGTGTGTATTCTTTGTTAATGGTGATGACTTATTGATTGCTGTGAATCCGGAGAAAGAGAGCATTCTCGATAGAATGTCACAACATTTCTCAGATCTTGGTTTGAACTATGATTTTTCGTCGAGAACAAGAAGGAAGGAGGAATTGTGGTTCATGTCCCATAGAGGCCTGCTAATCGAGGGTATGTACGTGCCAAAGCTTGAAGAAGAGAGAATTGTATCCATTTTGCAATGGGATAGAGCTGATCTGCCAGAGCACAGATTAGAAGCGATTTGTGCAGCAATGATAGAATCCTGGGGTTATTTTGAGTTAACGCACCAAATCAGGAGATTTTACTCATGGTTGTTGCAACAGCAACCTTTTTCAACGATAGCACAGGAAGGAAAAGCTCCATACATAGCGAGCATGGCATTGAAGAAGCTGTACATGAATAGGACAGTAGATGAGGAGGAACTGAAGGCTTTCACTGAAATGATG?GTTGCCTTGGATGATGAACTTGAGTGCGATACTTATGAAGTGCACCATCAAGGAAAT---------GACACAATCGATGCAGGAGGAAGCACTAAGAAGGATGCAAAACAAGAGCAAGGTAGCATTCAACCAAATCTCAACAAGGAAAAG---------------------------GAAAAGGACGTGAATGTTGGAACATCTGGAACTCATACTGTGCCACGAATTAAAGCTATCACGTCCAAAATGAGAATGCCCAAGAGTAAAGGTGCAACTGTACTAAATTTGGAACACTTACTCGAGTATGCTCCACAGCAAATTGACATCTCAAATACTCGAGCAACTCAATCACAGTTTGATACGTGGTATGAAGCGGTACAACTTGCATACGACATAGGAGAAACTGAAATGCCAACTGTGATGAATGGGCTTATGGTTTGGTGCATTGAAAATGGAACCTCGCCAAACATCAACGGAGTTTGGGTTATGATGGATGGAGATGAACAAGTCGAATACCCACTGAAACCAATCGTTGAGAATGCAAAACCAACACTTAGGCAAATCATGGCACATTTCTCAGATGTTGCAGAAGCGTATATAGAAATGCGCAACAAAAAGGAACCATATATGCCACGATATGGTTTAGTTCGTAATCTGCGCGATGGAAGTTTGGCTCGCTATGCTTTTGACTTTTATGAGGTCACATCACGAACACCAGTGAGGGCTAGGGAAGCGCACATTCAAATGAAGGCCGCAGCATTGAAATCAGCCCAACCTCGACTTTTCGGGTTGGACGGTGGCATTAGTACACAAGAGGAGAACACAGAGAGGCACACCACCGAGGATGTCTCTCCAAGTATGCATACTCTACTTGGAGTCAAGAACATGTGATTGTAGTGTCTCTCCGGACGATATATAAGTATTTACA-TATGCAGTAAGTATTTTGGCTTTTCCTGTACTACTTTTATCATAATTAATAATCAGTTTGAATATTACTAATAGATAGAGGTGGCAGGGTGATTTCGTCATTGT-GGTGACTCTATCTTTTAATTCCGCATTATT-------------------------------------------------------------------------------------------------------------------------------------------------------------------------------------------------------------------------------------AAGTCTTAGATAAAAGTGCCGGGTTGTCGTTGTTGTGGATGATTCATCGATTAGGTGATGTTGCGATTTTGTCGTAGCAGTGACTATGTCTGGATCTAGTCTGCTTGGGTGGTGTTGTGATTTCGTCATAACAGTGACTGTAAACTTCAATCAGGAGA?
	Z14          ????????????????????????????????????????????????????????????????????????????????????????????????????????????????????????????????????????????????????????????????????????????????????????????????????????????????????????TTTGGTTCCATTGAATGCAAACTTCCATACTCACCCGCTCCTTTTGGGCTAGTTGCGGGGAAACGAGAAGTTTCAACC-------------------------------------------------------------------------------------------------------------------------------------------------------------------------------------------------------------------------------------------------------------------------------------------------------------------------------------------------------------------------------------------------------------------------------------------------------------------------------------------------------------------------------------------------------------------------------------------------------------------------------------------------------------------------------------------------------------------ACCACTGACCCCTTCGCAAGTTTGGAGATGCAGCTTAGTGCGCGATTACGAAGGCAAGAGTTTGCAACTATTCGAACATCCAAGAATGGTACTTGCATGTATCGATACAAGACTGATGTCCAGATTGCGCGCATTCAAAAGAAGCGCGAGGAGAGAGAAAGAGAGGAATATAATTTCCAAATGGCTGCGTCAAGTGTTGTGTCGAAGATCACTATTGCTGGTGGAGAGCCACCTTCAAAACTTGAATCACAAGTGCGGAGGGGTGTTATCCACACAACTCCAAGGATGCGCACAGCAAAAACATATCACACGCCAAAGTTGACAGAGGGACAAATGAACCACCTTATTAAGCGGGTGAAGCAAATTATGTCAACCAAAGGAGGGTCTGTCCAACTGATTAGCAAGAAAAACACCCATGTTCACTATAAAGAAGTTTTGGGGTCACATCGCGCGGTTGTTTGCACTGCA?CACATGAGAGGTTTACGAAAGAGAGTGGACTTTCGGTGTGACAAATGGACCGTTGTGCGTCTACAGCATCTCGCCAGGACGGACAAGTGGGTATACCAAGTTCGTGCTACTGATCTACGCAAGGGCGATAGTGGAGTTATATTGAGTAATACTAATCTCAAAGGACACTTTGGAAGAAGCTCGGAGGGCCTATTCATAGTGCGTGGGTCGCACGAAGGAAAAATCTATGATGCACGTTCCAAGGTTACTCAAGGGGTTATGGATTCAATGGTTCAGTTCTCAAGCGCTGAAAGCTTTTGGAAGGGATTGGACGGCAATTGGGCACAAATGAGATATCCTACAGATCATACATGTGTGGCAGGCTTACCAGTTGAAGACTGTGGCAGAGTTGCAGCGATAATGACACACAGTATTTTACCGTGCTATAAGATAACCTGCCCTACCTGTGCCCAACAATATGCCAACTTGCCAGCCAGTGACTTACTTAAGATATTACACAAGAGCGCAAGTGATGGTTTAAATCGATTGGGGGCAGACAAAGATCGCTTTGTGCATGTCAAAAAGTTCTTGACAATCTTAGAGCACTTAACTGAACCGGTTGATCTGAGTCTAGAAATTTTCAATGAAGTATTCAAGTCTATAGGGGAGAAGCAACAATCACCTTTCAAAAACCTGAATATTCTGAATAATTTCTTTTTGAAAGGAAAGGAAAATACAGCTCGTGAATGGCAGGTGGCTCATTTAACCTTACTTGAATTGGCAAGATTCCAAAAGAACAGAACGGATAATATCAAGAAAGGAGACATCTCGTTCTTTAGGAATAAACTATCTGCCAAAGCAAATTGGAACTTGTATCTGTCATGTGATAACCAACTGGATAAGAAAGCAAACTTCCTGTGGGGACAGAGAGAATATCATGCTAAGCGATTTTTCTCGAACTATTTCGAGGAAATTGATCCAGCGAAGGGCTATTCAGCATATGAAAATCGTTTGCATCCGAATGGGACAAGAAAACTTGCAATTGGAAACCTAATTGTACCACTTGATCTGGCTGAGTTTAGGCGGAAGATGAAAGGTGATTATAAAAGACAGCCCGGGGTGAGTAAGAAGTGCACGAGCTCGAAGGATGGAAACTACGTGTATCCCTGGTGGTGCACTACACTTGAGGATGGCTCAGCTGTTGAATCAACATTTTACCCCCCAACTAAAAAGCACCTCGTAATAGGTAATAGTGGCGATCAAAAGTATGTTGACTTACCAAAAGGGAATTCTGAGATGTTATATATTGCCAGGCAAGGTTTCTGTTACATTAACATTTTCCTCGCGATGTTGATAAACATTAGTGAGGAAGATGCAAAGGATTTCACTAAGAAGGTTCGTGACATGTGTGTGCCAAAGCTTGGAACCGGGCCAACCATGATGGATCTGGCTACAACTTGTGCTCAAATGAAAATATTCTACCCTGATGTTCATGATGCAGAACTGCCTAGAATACTAGTCGATCACGAAACGCAGACATGCCATGTGGTTGACTCGTTTGGCTCACAAACAACTGGGTATCATATTTTGAAAGCATCTAGCGTGTCCCAACTTATTTTGTTTGCTAATGATGAGTTGGAGTCTGACATTAAGCACTATAGAGTTGGTGGTATTCCTAATGCATGCCCTGAACTTGGGTCTACAAT-ATCACCTTTCAGAGAAGGAGGAGTTATAATGTCTGAGTCGGCAGCGCTGAAACTGCTTTTGAAGGGAATTTTTAGACCTAAGGTGATGAGACAGTTGCTGTTAGATGAGCCTTACCTGTTGATTCTATCAATATTATCCCCTGGCATACTGATGGCTATGTACAATAATGGGATTTTTGAACTTGCGGTAAGGTTGTGGATTAATGAGAAACAATCCATAGCTATGATAGCATCGCTACTATCAGCTTTAGCCCTACGAGTGTCAGCGGCAGAAACACTCGTCGCACAGAGGATTATAATTGATACTGCAGCTACAGATCTCCTTGATGCTACGTGCGATGGGTTCAACCTACATCTAACGTACCCCACTGCGTTGATGGTGTTGCAAGTTGTTAAGAATAGAAATGAATGTGATGATACCCTATTCAAGGCGGGTTTTCCAAGTTACAACACGAGCGTCGTACAGATCATGGAAAAAAATTATCTAAATCTCTTGAACGATGCTTGGAAAGATTTAACTTGGCGGGAAAAATTATCCGCAACATGGTACTCATACAGAGCAAAACGCTCTATCACTCGGTACATAAAACCCACAGGAAGGGCAGATTTGAAAGGGTTATACAACATATCACCACAAGCATTCTTGGGCCGAGGCGCCCAGGTGGTCAAAGGCACTGCCTCAGGATTGAGCGAGCGATTTAATAATTATTTCAATACTAAGTGTGTGAATATTTCATCCTTTTTCATTCGTAGAATCTTTAGGCGTTTGCCAACTTTCGTCACTTTTGTTAACTCATTATTAGTTATTAGTATGTTAACCAGCGTAGTGGCAGTGTGTCAGGCAATAATTTTAGATCAGAGGAAGTATAGGAGAGAAATCGAGTTGATGCAGATAGAGAAGAATGAGATCGTCTGCATGGAGCTATATGCAAGTTTACAGCGCAAACTTGAACGCGATTTCACATGGGATGAGTACATTGAGTATTTGAAGTCTGTAAACCCTCAGATAGTTCAGTTTGCTCAAGCGCAGATGGAAGAATATGATGTGCGACACCAGCGTTCCACACCAGGTGTTAAAAATTTGGAACAAGTGGTAGCATTTATGGCTTTAGTCATCATGGTGTTCGATGCTGAAAGGAGTGATTGCGTGTTCAAAACTCTCAATAAATTTAAGGGTGTCCTTTCCTCACTGGACCATGAAGTTAGACATCAGTCCTTAGACGATGTGATCAAGAATTTTGATGAGAGGAATGAGACTATTGATTTTGAATTGAGTGAGGACACAATTCGAACATCATCAGTGCTAGATACAAAGTTTAGTGATTGGTGGGACCGACAAATCCAGATGGGACATACACTTCCACATTACAGAACCGAGGGGCACTTCATGGAATTCACAAGAGCAACTGCTGTCCAAGTGGCTAATGATATCGCCCACAGCGAACACCTAGACTTTCTAGTAAGGGGAGCTGTTGGGTCTGGAAAGTCAAATGGGTTGCCTGTTCATCTTAGTGTAGCTGGATCTGTGCTTTTAATTGAACCAACGCGACCACTAGCGGAGAACGTTTTCAAACAGCTATCTAGTGAACCTTTCTTCAAGAAGCCAACACTGCGTATGCGTGGAAATAGTATATTTGGCTCTTCTTCAATCTCCGTCATGACTAGCGGATTTGCGCTACACTACTTTGCCAATAATCGCTCTCAATTAGCTCAGTTCAACTTTGTGATATTTGATGAGTGCCATGTTCTGGATCCTTCCGCAATGGCGTTCCGCAGTCTGCTGAGTGTTTACCATCAAGCATGCAAAGTATTAAAAGTGTCAGCTACTCCAGTGGGAAGAGAGGTTGAATTTACAACACAGCAACCAGTCAAGTTAATAGTAGAGGACACACTGTCTTTCCAATCATTTGTTGATGCACAAGGTTCTAAAACTAATGCTGATGTTGTTCAGTTTGGTTCAAACGTACTTGTGTACGTGTCGAGCTACAATGAAGTTGACACCTTGGCTAAGCTCCTAACAGACAAGAATATGATGGTCACAAAGGTTGATGGCAGAACAATGAAGCACGGTTGCCTAGAAATTGTCACAAAAGGAACCAGTGCGAGACCACATTTTGTTGTAGCAACCAACATAATTGAGAATGGAGTAACTTTGGACATAGACGTGGTTGTAGATTTTGGATTGAAAGTCTCACCGTTCTTGGACATTGACAATAGGAGCATTGCTTACAATAAGGTGAGTGTTAGCTATGGTGAGAGAATTCAAAGGCTGGGTCGTGTTGGACGCTTCAAGAAAGGAGTAGCATTGCGCATTGGACACACTGAGAAGGGAATTATTGAAATTCCAAGCATGATCGCTACAGAGGCGGCTCTTGCTTGCTTTGCATATAACTTGCCAGTGATGACAGGAGGCGTCTCAACTAGTCTGATTGGCAATTGTACTGTGCGCCAAGTTAAAACAATGCAGCAATTTGAATTGAGTCCCTTCTTTATCCAGAATTTCGTTGCCCACGATGGATCAATGCATCCTGTCATACATGACATTCTTAAAAAGTATAAACTTCGAGATTGTATGACACCTTTGTGCGATCAGTCTATACCATACAGGGCATCGAGCACTTGGTTATCGGTTAGTGAATATAAGCGACTTGGAGTGGCCTTAGAAATTCCAAAGCAAGTCAAAATTGCATTCCATATCAAAGAGATCCCTCCTAAGCTCCACGAAATGCTTTGGGAAACGGTTGTCAAGTACAAAGACGTTTGCTTATTTCCAAGCATT-CGAGCATCGTCCATCAGCAAAATCGCATACACATTGCGTACAGACCTCTTTGCCATCCCAAGAACTCTAATATTGGTGGAGAGACTGCTTGAAGAGGAGCGAGTGAAGCAGAGCCAATTCAGAAGTCTCATTGACGAAGGATGCTCAAGCATGTTTTCAATTGTCAACTTGACAAACACTCTCAGAGCTAGATATGCAAAAGATTACACCGCAGAGAATATACAAAAACT?GAGAAAGTGAGAAGTCAATTGAAAGAATTCTCAAATTTGGATGGTTCTGCATGTGAGGAAAATTTAATAAAGAGGTATGAGTCTTTGCAGTTCGTTCATCACCAAGCTGCGACATCACTTGCAAAGGATCTCAAGTTGAAGGGGACTTGGAAGAAGTCATTAGTGGCCAAAGACTTGATCATAGCAGGCGCTGTTGCAATTGGTGGAATAGGACTCATATATAGTTGGTTCACACAATCAGTTGAGACTGTGTCTCACCAAGGGAAAAATAAATCCAAAAGAATTCAAGCCTTGAAGTTTCGCCATGCTCGTGACAAAAGGGCTGGCTTTGAAATTGACAACAATGATGACACAATAGAGGAATTCTTTGGATCTGCATACAGGAAGAAGGGAAAAGGTAAAGGCACCCCTGTTGGTATGGGCAAGTCAAGCAGGAGGTTTTTTAATATGTAGGGTTTTCCCCCACCAAAATATTCTTTCTTCCAGTTCTTTGATCCCCTCACTGGGGCTCAAATTAAAGAAAACGTCTATGCTGATATTAGAGACATCCAAGAGCGCTTTAGTGATGTCCGCAAGAAAATGGTAGAGGATGATGAAATCGAATTGCAAGCATTGGGCAGCAACACAACCATTCATGCTTACTTCAGGAAAGATTGGTCTGACAAGGCTCTAAAAATTGATTTGATGCCACACAACCCACTCAAAATCTGTGATAAATCGAATGGCATTGCTAAGTTTCCTGAAAGAGAACTTGAGTTGAGACAAACTGGGCCAGCAATAGAGGTTGATGTGAAAGACATTCCAAAACAGGAAGTGGAGCATGAAGCCAAATCACTCATGAGAGGTTTAAGGGATTTCAATCCAATTGCTCAAACAGTTTGCAGAGTAAAAGTGTCTGTTGAATATGGAACGTCTGAAATGTATGGGTTCGGTTTTGGTGCGTATATTATAGTAAACCACCATCTATTCAAGAGTTTCAATGGATCCATGGAAGTGCGATCAATGCATGGAACATTCAGAGTGAAGAATTTGCATAGCTTGAGCGTTTTACCGATCAAAGGCAGAGACATTATCATCATAAAGATGCCAAAGGATTTCCCTGTTTTCCCACAAAAACTGCACTTCCGAGCTCCAGTGCAGAATGAGAGGATTTGTTTGGTTGGAACTAATTTTCAGGAAAAACATGCATCATCAATCATCACAGAAACGAGTACTACATACAATGTACCGGGCAGCACTTTTTGGAAGCATTGGATTGAAACAAATGATGGGCATTGTGGATTACCAGTAGTGAGTACAGCTGATGGTTGTCTAGTTGGAATACACAGCTTGGCGAATAATGTGCAAACCACGAATTATTATTCAGCCTTTGATGAGGATTTTGAAAGTAAGTATCTCCGAACTAATGAGCATAATGAGTGGACCAAATCGTGGGTATATAACCCAGATACTGTGTTGTGGGGTCCATTAAAGCTCAAGGAGAGTACCCCTAAAGGCCTGTTTAAGACAACAAAACTTGTACAGGATTTGAT------TGATCATGATGTTGTTGTAGAGCAAGCTAAACATTCTGCGTGGATGTATGAGGCTCTAACAGGGAATTTGCAAGCTGTGGCGACAATGAAGAGTCAGCTGGTGACAAAGCACGTGGTCAAAGGGGAGTGTCGGCACTTCAAAGAGTTCTTAACTGTGGATTCGGAAGCAGAAGCT------TTCTTCAGGCCTTTGATGGATGCTTATGGGAAGAGCTTGTTAAATAGAGAAGCATATATAAAGGACATAATGAAATACTCAAAGCCTATTGATGTTGGAATAGTAGACTGTGAT--GCTTTTGAAGAGGCTATCAATAGGGTTATCATTTATCTGCAA-GTGCATGGCTTCCAGAAATGCAATTACATCACCGATGAGCAGGAAATCTTCAAAGCTCTCAATATGAAAGCTGCTGTCGGAGCTATGTATGGAGGCAAGAAGAAAGACTACTTCGAGCATTTTACTGAGGCGGATAAAGAGGAAATTGTTATGCAAAGTTGCCTTCGATTGTACAAGGGCTCGCTTGGCATATGGAATGGATCATTGAAAGCAGAACTTCGGTGCAAAGAGAAGATACTTGCAAATAAGACAAGGACATTCACTGCTGCACCTTAAGATACTCTACTGGGTGGAAAGGTGTGCGTCGATGATTATAATAATCAATTCTACTCGAAGAACATTGAATGCTGCTGGACTGTTGGAATGACTAAGTTTTATGGAGGTTGGGACAGATTGCTTCGGCGTCTACCTGAAAATT---GGGTGTACTGCGATGCCGATGGTTCACAATTCGATAGTTCACTCACCCCATACCTAATTAATGCTGTTCTCATCATCAGAAGCACATACATGGAAGATTGGGACTTGGGGTTGCAAATGTTGCGCAATTTGTACACAGAAATAATTTACACACCAATCTCAACTCCAGATGGAACAATTGTCAAGAAGTTTAGAGGTAATAATAGCGGTCAACCTTCTACCGTTGTGGATAATTCTCTCATGGTTGTCCTTGCTATGCATTACGCTCTCATTAAGGAGTGCGTTGAGTTTGAAGAAATCGACAGCACGTGTGTATTCTTTGTTAATGGTGATGACTTATTGATTGCTGTGAATCCGGAGAAAGAGAGCATTCTCGATAGAATGTCACAACATTTCTCAGATCTTGGTTTGAACTATGATTTTTCGTCGAGAACAAGAAGGAAGGAGGAATTGTGGTTCATGTCCCATAGAGGCCTGCTAATCGAGGGTATGTACGTGCCAAAGCTTGAAGAAGAGAGAATTGTATCCATTTTGCAATGGGATAGAGCTGATCTGCCAGAGCACAGATTAGAAGCGATTTGTGCAGCAATGATAGAATCCTGGGGTTATTTTGAGTTAACGCACCAAATCAGGAGATTTTACTCATGGTTGTTGCAACAGCAACCTTTTTCAACGATAGCACAGGAAGGAAAAGCTCCATACATAGCGAGCATGGCATTGAAGAAGCTGTACATGAATAGGACAGTAGATGAGGAGGAACTGAAGGCTTTCACTGAAATGATG?GTTGCCTTGGATGATGAACTTGAGTGCGATACTTATGAAGTGCACCATCAAGGAAAT---------GACACAATCGATGCAGGAGGAAGCACTAAAGATGATGCAAAACAAGAGCAAGGTAGCATTCAACCAAATCTCAACAAGGAAAAG---------------------------GAAAAGGACGTGAATGTTGGAACATCTGGAACTCATACTGTGCCACGAATTAAAGCTATCACGTCCAAAATGAGAATGCCCAAGAGTAAAGGTGCAACTGTACTAAATTTGGAACACTTACTCGAGTATGCTCCACAGCAAATTGACATCTCAAATACTCGAGCAACTCAATCACAGTTTGATTCGTGGTATGAAGCGGTACAACTTGCATACGACATAGGAGAAACTGAAATGCCAACTGTGATGAATGGGCTTATGGTTTGGTGCATTGAAAATGGAACCTCGCAAAACATCAACGGATTTGGGGTTATGATGGATGGAGATGAACAAGTCGAATCCCCACTGAAACCAATCGTTGAAAATGCAAAACCAACACTTAGGCAAATCATGGCACATTTCTCAGATGTTGCAGAAGCGTATATAGAAATGCGCAACAAAAAGGAACCATATATGCCACGATATGGTTTAGTTCGTAATCTGCGCGATGGAAGTTTGGCTCGCTATGCTTTTGACTTTTATGAAGTCACATCACGAACACCAGTGAGGGCTAGGGAAGCGCACATTCAAATGAAGGCCGCAGCATTGAAATCAGCCCAACCTCGACTTTTCGGGTTGGACGGTGGCATCAGTACACAAGAGGAGAACACAGAGAGGCACACCACCGAGGATGTCTCTCCAAGTATGCATACTCTACTTGGAGTCAAGAACATGTGATTGTAGTGTCTCTCCCGACGATATATAAGTATTTACA-TATGCAGTAAGTATTTTGGCTTTTCCTGTACTACTTTTATCATAATTAATAATCAGTTTGAATATTACTAATAGATAGAGGTGGCAGGGGGATTTTGTCATTGT-GGTGACTCTATCTTTTAATTCCGCATTATT-------------------------------------------------------------------------------------------------------------------------------------------------------------------------------------------------------------------------------------AAGTCTTAGATAAAAGTGCCGGGTTGTCGTTGTTGTGGATGATTCATCGATTAGGTGATGTTGCGATTCTGTCGTAGCAGTGACTATGTCTGGA?????????????????????????????????????????????????????????????????
	Z16          ????????????????????????????????????????????????????????????????????????????????????????????????????????????????????????????????????????????????????????????????????????????????????????????????????????????????????????TTTGGTTC?ATTGA?TGCAAACTTCCATACTCACCCGCTCCTTTTGGGCTAGTTGCGGGAAAACGAGAAGTTTCAACC-------------------------------------------------------------------------------------------------------------------------------------------------------------------------------------------------------------------------------------------------------------------------------------------------------------------------------------------------------------------------------------------------------------------------------------------------------------------------------------------------------------------------------------------------------------------------------------------------------------------------------------------------------------------------------------------------------------------ACCACTGACCCCTTCGCAAGTTTGGAAATGCAGCTTAGTGCGCGATTACGAAGGCAAGAGTTTGCAACTATTCGAACATCCAAGAATGGTACTTGCATGTATCGATACAAGACTGATGTCCAGATTGCGCGCATTCAAAAGAAGCGCGAGGAGAGAGAAAGAGAGGAATATAATTTCCAAATGGCTGCGTCAAGTGTTGTGTCGAAGATCACTATTGCTGGTGGAGAGCCACCTTCAAAACTTGAATCACAAGTGCGGAGGGGTGTCATCCACACAACTCCAAGGATGCGCACAGCAAAAACATATCACACGCCAAAGTTGACAGAGGGACAAATGATCCACCTTATCAAGCAGGTGAAGCAAATTATGTCAACCAAAGGAGGGTCTGTCCAACTGATTAGCAAGAAAAACACCCATGTTCACTATAAAGAAGTTTTGGGGTCACATCGCGCGGTTGTTTGCACTGCA?CACATGAGAGGTTTACGAAAGAGAGTGGACTTTCGGTGTGACAAATGGACCGTTGTGCGTCTACAGCATCTCGCCAGGACGGACAAGTGGATATACCAAGTTCGTGCTACTGATCTACGCAAGGGCGATAGTGGAGTTATATTGAGTAATACTAATCTCAAAGGAAACTTTGGAAGAAGCTCGGAGGGCCTATTCATAGTGCGTGGGTCGCACGAAGGAAAAATCTATGATGCACGTTCCAAGGTTACTCAAGGGGTTATGGATTCAATGGTTCAGTTCTCAAGCGCTGAAAGCTTTTGGAAGGGATTGGACGGCAATTGGGCACAAATGAGATATCCTACAGATCATACATGTGTGGCAGGCTTACCAGTTGAGGACTGTGGCAGAGTTGCAGCGATAATGACACACAGTATTTTACCGTGCTATAAGATAACCTGCCCTACCTGTGCCCAACAATATGCCAACTTGCCAGCCAGTGACTTACTTAAGATATTGCACAAGCACGCAAGTGATGGTTTAAATCGATTGGGGGCAGACAAAGATCGCTTTGTGCATGTCAAAAAGTTCTTGACAATCTTAGAGCACTTAACTGAACCGGTTGATCTGAGTCTAGAAATTTTCAATGAAGTATTCAAGTCTATAGGGGAGAAGCAACAATCACCTTTCAAAAACCTGAATATTCTGAATAATTTCTTTTTGAAAGGAAAGGAAAATACAGCTCGTGAATGGCAGGTGGCTCATTCAACCTTACTTGAATTGGCAAGATTCCAAAAGAACAGAACGGATAATTTAAAAAAGGGCGACGTCTCGTTCTTTAGGAATAAACTATCTGCCAAAGCAAATTGGAACTTGTATCTGTCATGTGATAACCAGCTGGATAAGAATGCAAACTTCCTGTGGGGACAGAGAGAATATCATGCTAAGCGATTTTTCTCGAACTATTTTGAGGAAATTGATCCAGCGAAGGGCTATTCAGCATACGAAAATCGTTTGCATCCGAATGGGACAAGAAAACTTGCAATTGGAAACCTAATTGTACCACTTGATCTGGCTGAGTTTAGGCGGAAGATGAAAGGTGATTATAAAAGACAGCCAGGGGTGAGTAAGAAGTGCACGAGCTCGAAGGATGGAAACTACGTGTATCCCTGGTGGTGCACTACACCTGATGATGGCTCAGCTGTTGGTACAACGTTTTACCCCCCAACTAAAAAGCACCTCGTAATAGGTAATAGTGGCGATCAAAAGTATGTTGACTTACCAAAAGGGAATTCTGAGATGTTATATATTGCCAGGCAAGGTTTCTGTTACATTAACATTTTCCTCGCGATGTTGATTAACATTAGTGAGGAAGATGCAAAGGATTTCACTAAGAAGGTTCGTGACATGTGTGTGCCAAAGCTTGGAACCTGGCCAACCATGATGGATCTGGCTACAACTTGTGCTCAAATGAAAATATTCTACCCTGATGTTCATGATGCAAAACTGCCTAGAATACTAGTCAATCACAAAACGCAGACATGCCATGTGGTTGACTCGTTTGGCTCACAAACAACTGGGTATCATATTTTGAAAGCATCTAGCGTGTCCCAACTAATTTTGTTTGCTAATGATGAGTTGGAGTCTGACTTTAAGCACTATAGAGTGGGTGGAATTCCTCATGCACGCCCTGAACTTGGGTCTACAAT-AACCCCTTTCATAGAGGGAAGAGAAATATTATCTGAGTCGGCAGCGCTGAAACTGCTTTTGAAGGGAATTTTTAGACCTAAGGTGATGAGACAGTTGCTGTTAGATGAGCCTTACCTGTTGATTCTATCAATATTATCCCCTGGCATACTGATGGCTATGTACAATAATGGGATTTTTGAACTTGCGGTAAGGTTGTGGATTAATGAGAAACAATCCATAGCTATGATAGCATCGCTACTATCAGCTTTAGCCCTACGAGTGTCAGCGGCAGAAACACTCGTCGCACAGAGGATTATAATTGATACTGCAGCCACAGATCTCCTTGATGCTACGTGCGATGGGTTCAACCTACATCTAACGTACCCCACTGCGTTGATGGTGTTGCAAGTTGTTAAGAATAGAAATGAATGTGATGATACCCTATTCAAGGCGGGTTTTCCAAGTTACAACACGAGCGTCGTACAGATCATGGAAAAAAATTATCTAAATCTCTTGAACGATGCTTGGAAAGATTTAACTTGGCGGGAAAAATTATCCGCAACATGGTACTCATACAGAGCAAAACGCTCTATCACTCGGTACATAAAACCCACAGGAAGGGCAGATTTGAAAGGGTTATACAACATATCACCACAAGCATTCTTGGGCCGAGGCGCCCAGGTGGTCAAAGGCACTGCCTCAGGATTGAGCGAGCGATTTAATAATTATTTCAATACTAAGTGTGTGAATATTTCATCCTTTTTCATTCGTAGAATCTTTAGGCGTTTGCCAACTTTCGTCACTTTTGTTAACTCATTATTAGTTATTAGTATGTTAACCAGCGTAGTGGCAGTGTGTCAGGCAATAATTTTAGATCAGAGGAAGTATAGGAGAGAAATTGAGTTGATGCAGATAGAGAAGAATGAGATCGTCTGCATGGAGCTATATGCAAGTTTACAGCGCAAACTTGAACGCGATTTCGCATGGGATGAGTACATTGAGTATTTAAAGTCGGTAAACCCtCAGATAGTTCaGTTTGcTCACCCCCAAATGGAAGAAtAtAATGTGCGACaCCaGCGTTCCCCACCCGGTGTTAAAAATTTGGAACAAGTGGGAGCATTTATGGCTTTAGTCATCATGGTGTTTGATGCTGAAAGGAGGGATTGGGTGTTCAAAACTCTCAAAAAATTTAAGGGTGTCCTTTCCTCACTGGACCATGAAGTTAGACATCAGTCCTTAGACGAAGTGATCAAGAATTTTGATGAGAGGAAAGAGACTATTGATTTTGAATTGAGTGGGGACACAATTTGAACATCATCAGTGCTAGATACAAAGGTTAGTGAATGGTGGGACCGACTAATTTAGATGGGACATACACTTCCACATTACAGAACCGAGGGGCACTTCATGGAATTCACAAGAGCAACTGCTGTCCAAGTGGCTAATGATATCGCCCACAGCGAACACCTAGACTTTCTAGTAAGGGGAGCTGTTGGGTCTGGAAAGTCAAATGGGTTGCCTGTTCATCTTAGTGTAGCTGGATCTGTGCTTTTAATTGAACCAACGCGACCACTAGCGGAGAACGTTTTCAAACAGCTATCTAGTGAACCTTTCTTCAAGAAGCCAACACTGCGTATGCGTGGAAATAGTATATTTGGCTCTTCTTCAATCTCCGTCATGACTAGCGGATTTGCGCTACACTACTTTGCCAATAATCGCTCTCAATTAGCTCAGTTCAACTTTGTGATATTTGATGAGTGCCATGTTCTGGATCCTTCCGCAATGGCGTTCCGCAGTCTGCTGAGTGTTTACCATCAAGCATGCAAAGTATTAAAAGTGTCAGCTTCTCCAGTGGGAAGAGAGGTTGAGTTTACAACACAGCAACCAGTCAAGTTAATAGTGGAGGACACACTGTCTTTCCAATCATTTGTTGATGCACAAGGTTCTAAAACCAATGCTGATGTTGTTCAGTTTGGTTCAAACGTACTTGTGTACGTGTCGAGCTACAATGAAGTTGACACCTTGGCTAAGCTCCTAACAGACAAGAATATGATGGTCACAAAGGTTGATGGCAGAACAATGAAGCACGGTTGCCTAGAAATTGTCACAAAAGGAACCAGTGCGAGACCGCATTTTGTTGTAGCAACCAACATAATTGAGAATGGAGTGACTTTGGACATAGACGTGGTTGTAGATTTTGGGTTGAAAGTCTCACCGTTCTTGGACATTGACAATAGGAGCATTGCTTACAATAAGGTGAGTGTTAGCTATGGTGAGAGAATTCAAAGGCTGGGTCGTGTTGGACGCTCAAAGAAAGGAGTAGCATTGCGCATTGGACACACTGAGAAGGGAATTATTGAAATTCCAAGCATGATCGCTACAGAGGCGGCTCTTGCTTGCTTTGCATATAACTTGCCAGTGATGACAGGAGGCGTCTCAACTAGTCTGATTGGCAATTGTACTGTGCGCCAAGTTAAAACAATGCAGCAATTTGAATTGAGTCCCTTCTTTATCCAGAATTTCGTTGCCCACGATGGATCAATGCATCCTGTCATACATGACATTCTTAAAAAGTATAAACTTCGAGATTGTATGACACCTTTGTGCGATCAGTCTATACCATACAGGGCATCGAGCACTTGGTTATCGGTTAGTGAATATAAGCGACTTGGAGTGGCCTTAGAAATTCCAAAGCAAGTCAAAATTGCATTCCATATCAAAGAGATCCCTCCTAAGCTCCAAGAAATGCTTAGGAAAACGGGTGGCAAGTACAAAGACGTTTGCTTCTTTCCAAGCATT-CGAGCATCGTCCATCAGCAAAATCGCATACACATTGCGTACAGACCTCTTCGCCATCCCAAGAACTCTAATATTGGTGGAGAGACTGCTTGAAGAGGAGCGAGTGAAGCAGAGCCAATTCAGAAGTCTCATCGACGAAGGATGCTCAAGCATGTTTTCAATTGTCAACTTGACAAACACTCTCAGAGCTAGATATGCAAAAGATTACACCGCAGAGAATATACAAAAACT?GAGAAAGTGAGAAGTCAATTGAAAGAATTCTCAAATTTGGATGGTTCTGCATGTGAGGAAAATTTAATAAAGAGGTATGAGTCTTTGCAGTTCGTTCATCACCAAGTTGCGACGTCACTTGCAAAGGATCTCAAGTTGAAGGGGACTTGGAAGAAGTCATTAGTGGCCAAAGATTTGATCATAGCAGGCGCTGTTGCAATTGGTGGAATAGGACTCATATATAGTTGGTTCACACAATCAGTTGAGACTGTGTCTCACCAAGGGAAAAATAAATCCAAAAGAATTCAAGCCTTGAAGTTTCGCCATGCTCGTGACAAAAGGGCTGGCTTTGAAATTGACAACAATGATGACACAATAGAGGAATTCTTTGGATCTGCATACAGGAAGAAGGGAAAAGGTAAAGGCACCACTGTTGGTATGGGCAAGTCAAGCAGGAGGTTTGTTAATATGTATGGATTTGACCCAACAGAATATTCATTCATCCAGTTCGTTGATCCGCTCACTGGAGCTCAAATTGAAGAGAACGTCTATGCTGATATTAGAGACATCCAAGAGCGCTTTAGTGATGTCCGCAAGAAAATGGTAGAGGATGATGAAATCGAATTGCAAGCATTGGGCAGCAACACAACCATTCATGCTTACTTCAGGAAAGATTGGTCTGACAAGGCTCTAAAAATTGATTTGATGCCACACAACCCACTCAAAATCTGTGATAAATCGAATGGCATTGCTAAGTTTCCTGAAAGAGAACTTGAGTTGAGACAAACTGGGCCAGCAATAGAGGTTGATGTGAAAGACATTCCAAAACAGGAAGTGGAGCATGAAGCCAAATCACTCATGAGAGGTTTAAGGGATTTCAATCCAATTGCTCAAACAGTTTGCAGAGTAAAAGTGTCTGTTGAATATGGAACGTCTGAAATGTATGGGTTCGGTTTTGGTGCGTATATTATAGTAAACCACCATCTATTCAAGAGTTTCAATGGATCCATGGAAGTGCGATCAATGCATGGAACATTCAGAGTGAAGAATTTGCATAGCTTGAGCGTTTTACCGATCAAAGGCAGAGACATTATCATCATAAAGATGCCAAAGGATTTCCCTGTTTTCCCACAAAAACTGCACTTCCGAGCTCCAGTGCAGAATGAGAGGATTTGTTTGGTTGGAACTAATTTTCAGGAAAAACATGCATCATCAATCATCACAGAAACGAGTACTACATACAATGTACCGGGCAGCACTTTTTGGAAGCATTGGATTGAAACAAATGATGGGCATTGTGGATTACCAGTAGTGAGTACAGCTGATGGTTGTCTAGTTGGAATACACAGCTTGGCGAATAATGTGCAAACCACGAATTATTATTCAGCCTTTGATGAGGATTTTGAAAGTAAGTATCTCCGAACTAATGAGCATAATGAGTGGACCAAATCGTGGGTATATAACCCAGATACTGTGTTGTGGGGTCCATTAAAGCTCAAGGAGAGTACCCCTAAAGGCCTGTTTAAGACAACAAAACTTGTACAGGATTTAAT------TGATCATGATGTTGTTGTAGAGCAAGCTAAACACTCTGCGTGGATGTATGAGGCTCTAACAGGGAATTTGCAAGCTGTGGCGACAATGAAGAGTCAGCTGGTGACAAAGCACGTGGTCAAAGGGGAGTGTCGGCACTTCAAAGAGTTCTTAACTGTGGATTCGGAAGCAGAAGCT------TTCTTCAGGCCTTTGATGGATGCTTATGGGAAGAGCTTGTTAAATAGAGAAGCATACATAAAGGACATAATGAAATACTCAAAGCCTATTGATGTTGGAACAGTAGACTGTGAT--GCTTTTGAAGAGGCTATCAATAGGGTTATCATTTATCTGCAA-GTGCATGGCTTCCAGAAATGCAATTACATCACCGATGAGCAGGAAATTTTCAAAGCTCTCAATATGAAAGCTGCTGTCGGAGCTATGTATGGAGGCAAGAAGAAAGACTACTTCGAGCATTTTACTGAGGCGGATAAAGAGGAAATTGTTATGCAAAGTTGCCTTCGATTGTACAAGGGCTCGCTTGGCATATGGAATGGATCGTTGAAAGCAGAACTTCAGTGCAAAGAGAAGATACTTGCAAATAAGACAAGGACCTTCACTGCTGCACCTTTATATAATCTACTGGGCGGAAAGGTGTGCCTTCATGATTTTAATAATCAATTCTACTCGAAGAACATTGAATGCTGCTGGACTGTTGGAATGACTAAGTTTTATGGAGGTTGGGACAAATTGCTTCGGCGTCTACCTGAAAATT---GGGTGTACTGCGATGCCGATGGTTCACAATTCGATAGTTCACTCACCCCATACCTAATTAATGCTGTTCTCATCATCAGAAGCACATACATGGAAGATTGGGACTTGGGGTTGCAAATGTTGCGCAATTTGTACACAGAAATAATTTACACACCAATCTCAACTCCAGATGGAACAATTGTCAAGAAGTTTAGAGGTAATAATAGCGGTCAACCTTCTACCGTTGTGGATAATTCTCTCATGGTTGTCCTTGCTATGCATTACGCTCTCATTAAGGAGTGCGTTGAGTTTGAAGAAATCGACAGCACGTGTGTATTCTTTGTTAATGGTGATGACTTATTGATTGCTGTGAATCCGGAGAAAGAGAGCATTCTCGATAGAATGTCACAACATTTCTCAGATCTTGGTTTGAATTATGATTTTTCGTCGAGAACAAGAAGGAAGGAGGAATTGTGGTTCATGTCCCATAGAGGCCTGCTAATCGAGGGTATGTACGTGCCAAAGCTTGAAGAAGAGAGAATTGTATCCATTTTGCAATGGGATAGAGCTGATCTGCCAGAGCACAGATTAGAAGCGATTTGTGCAGCAATGATAGAATCCTGGGGTTATTTTGAGTTAACGCACCAAATCAGGAGATTTTACTCATGGTTGTTGCAACAGCAACCTTTTTCAACGATAGCACAGGAAGGAAAAGCTCCATACATAGCGAGCATGGCATTGAAGAAGCTGTACATGAATAGGACAGTAGATGAGGAGGAACTGAAGGCTTTCACTGAAATGATG?GTTGCCTTGGATGATGAACTTGAGTGCGATACTTATGAAGTGCACCATCAAGGAAAT---------GACACAATCGATGCAGGAGGAAGCACTAAGAAGGATGCAAAACAAGAGCAAGGTAGCATTCAACCAAATCTCAACAAGGAAAAG---------------------------GAAAAGGACGTGAATGTTGGAACATCTGGAACTCATACTGTGCCACGAATTAAAGCTATCACGTCCAAAATGAGAATGCCCAAGAGTAAAGGTGCAACTGTACTAAATTTGGAACACTTACTCGAGTATGCTCCACAGCAAATTGACATCTCAAATACTCGAGCAACTCAATCACAGTTTGATACGTGGTATGAAGCGGTACAACTTGCATACGACATAGGAGAAACTGAAATGCCAACTGTGATGAATGGGCTTATGGTTTGGTGCATTGAAAATGGAACCTCGCCAAACATCAACGGAGTTTGGGTTATGATGGATGGAGATGAACAAGTCGAATACCCACTGAAACCAATCGTTGAGAATGCAAAACCAACACTTAGGCAAATCATGGCACATTTCTCAGATGTTGCAGAAGGGTATATAGAAAAGCGCAACAAAAAGGAACCATATATGCCCCGATATGGTTTAGTTTGTAATTTGCGCGATGGAAGTTTGGCTCGCTATGCTTTTGACTTTTATGAAGTCACATCACGAACACCAGTGAGGGCTAGGGAAGCGCACATTCAAACGAAGGCCGCAGCATTGAAATCAGCCCAACCTCGACTTTTTGGGTTGGACGGGGGCATCAGTACACAAGAGGAGAACACAGAGAGGCACACCCCCGAGGATGTCTCTCCAAGTATGCATACTCTACTTGGAGTCAAGAACATGTGATTGTAGTGTCTCTCCGGACGATATATAAGTATTTACA-TATGCAGTAAGTATTTTGGCTTTTCCTGTGCTACTTTTATCATAATTAATAATCAGTTTGAATATTACTAATAGATAGAGGTGGCAGGGGGATTTTGTCATTGT-GGTGACTCTATCTTTTAATTCCGCATTATT-------------------------------------------------------------------------------------------------------------------------------------------------------------------------------------------------------------------------------------AAGTTTTAGATAAAAGTGCCGGGTTGTGGGTGTTGTGGATGATTCATCGATTAGGTGATGTTGCGATTCTGTCGTAGCAGTGACTATGTCTGGATAA??????????????????????????????????????????????????????????????
	NIB          ?????????????????????????????????????GCAAAAACACTCACAAAAGCTTTCAACTCTAATTCAAACAATTTGTTAAGTTTCAATTTCGATCTTCATCAAACAAACTCTTTCAATTTCAGTGTAAGCTATCGTAATTCAGTAAGTTATTTCAAACTCTCGTAAATTGCAGAAGATCATCCATGGCAACTTACACATCAACAATCCAGTTTGGTTCCATTGAATGCAAACTTCCATACTCACCCGCTCCTTTTGGGCTAGTTGCGGGGAAACGAGAAGTTTCAACC-------------------------------------------------------------------------------------------------------------------------------------------------------------------------------------------------------------------------------------------------------------------------------------------------------------------------------------------------------------------------------------------------------------------------------------------------------------------------------------------------------------------------------------------------------------------------------------------------------------------------------------------------------------------------------------------------------------------ACCACTGACCCCTTCGCAAGTTTGGAGATGCAGCTTAGTGCGCGATTACGAAGGCAAGAGTTTGCAACTATTCGAACATCCAAGAATGGTACTTGCATGTATCGATACAAGACCGATGTCCAGATTGCGCGCATTCAAAAGAAGCGCGAGGAGAGAGAAAGAGAGGAATATAATTTCCAAATGGCTGCGTCAAGTGTTGTGTCGAAGATCACTATTGCTGGTGGAGAGCCACCTTCAAAACTTGAATCACAAGTGCGGAGGGGTGTCATCCACACAACTCCAAGGATGCGCACAGCAAAAACATATCACACGCCAAAGTTGACAGAGGGACAAATGAACCACCTTATCAAGCAGGTGAAGCAAATTATGTCAACCAAAGGAGGGTCTGTTCAACTGATTAGCAAGAAAAGTACCCATGTTCACTATAAAAGAGTTTTGGGATCACATCGCGCAGTTGTTTGTACTGCA?CATATGAGAGGTTTACGAAAGAGAGTGGACTTTCGGTGTGATAAATGGACCGTTGTGCGTCTACAGCATCTCGCCAGGACGGACAAGTGGACTAACCAAGTTCGTGCTACTGATCTACGCAAGGGCGATAGTGGAGTTATATTGAGTAATGCTAATCTCAAAGGAAACTTTGGAAGAAGCTCGGAGGGCCTATTCATAGTGCGTGGGTCGCACGAAGGAAAAATCTATGATGCACGTTCCAAGGTTACTCAAGGGGTTATGGATTCAATGGTTCAGTTCTCAAGCGCTGAAAGCTTTTGGAAGGGATTGGACGGCAATTGGGCACAAATGAGATATCCTACAGATCATACATGTGTGGCAGGCTTACCAGTTGAAGACTGTGGCAGAGTTGCAGCGATAATGACACACAGTATTTTACCGTGCTATAAGATAACCTGCCCTACCTGTGCCCAACAATATGCTAACTTGCCAGCCAGTGACTTACTTAAGATATTACACAAGCACGCAAGTGATGGTTTAAATCGATTGGGGGCAGACAAAGATCGCTTTGTGCATGTCAAAAAGTTCTTGACAATCTTAGAGCACTTAACTGAACCGGTTGATCTGAGTCTAGAAATTTTCAATGAAGTATTCAAGTCTATAGGGGAGAAGCAACAATCACCTTTCAAAAACCTGAATATTCTGAATAATTTCTTTTTGAAAGGAAAGGAAAATACAGCTCGTGAATGGCAGGTGGCTCAATTAAGCTTACTTGAATTGGCAAGATTCCAAAAGAACAGAACGGATAATATCAGGAAAGGAGACATCTCGTTCTTTAGGAATAAACTATCTGCCAAAGCAAATTGGAACTTGTATCTGTCATGTGATAACCAGCTGGATAAGAATGCAAACTTCCTGTGGGGACAGAGAGAATATCATGCTAAGCGATTTTTCTCGAACTATTTCGAGGAAATTGATCCAGCGAAGGGCTATTCAGCATACGAAAATCGTTTGCATCCGAATGGGACAAGAAAACTTGCAATTGGAAACCTAATTGTACCACTTGATTTGGCTGAGTTTAGGCGGAAGATGAAAGGTGATTATAAAAGACAGCCAGGGGTGAGTAAGAAGTGCACGAGCTCGAAGGATGGAAACTACGTGTATCCCTGTTGTTGCACTACACTTGATGATGGCTCAGCTGTTGAATCAACATTTTACCCGCCAACTAAGAAGCACCTCGTAATAGGTAATAGTGGCGATCAAAAGTATGTTGACTTACCAAAAGGGAATTCTGAGATGTTATATATTGCCAGGCAAGGTTTCTGTTACATTAACATTTTCCTCGCGATGTTGATTAACATTAGTGAGGAAGATGCAAAGGATTTCACTAAGAAGGTTCGTGACATGTGTGTGCCAAAGCTTGGAACCTGGCCAACCATGATGGATCTGGCTACAACTTGTGCTCAAATGAAAATATTCTACCCTGATGTTCATGATGCAGAACTGCCTAGAATACTAGTCGATCACGAAACGCAGACATGCCATGTGGTTGACTCGTTTGGCTCACAAACAACTGGGTATCATATTTTGAAAGCATCTAGCGTGTCCCAACTTATTTTGTTTGCTAATGATGAGTTGGAGTCTGACATTAAGCACTATAGAGTTGGTGGTATTCCTAATGCATGCCCTGAACTTGGGTCTACAAT-ATCACCTTTCAGAGAAGGAGGAGTTATAATGTCTGAGTCGGCAGCGCTGAAACTGCTTTTGAAGGGAATTTTTAGACCTAAAGTGATGAGACAGTTGCTGTTAGATGAGCCTTACCTGTTGATTCTATCAATATTATCCCCTGGCATACTGATGGCTATGTACAATAATGGGATTTTTGAACTTGCGGTAAGGTTGTGGATTAATGAGAAACAATCCATAGCTATGATAGCATCGCTACTATCAGCTTTAGCCCTACGAGTGTCAGCGGCAGAAACACTCGTCGCACAGAGGATTATAATTGATACTGCAGCTACAGATCTCCTTGATGCTACGTGCGATGGGTTCAACCTACATTTAACGTACCCCACTGCGTTGATGGTGTTGCAAGTTGTTAAGAATAGAAATGAATGTGATGATACCCTATTCAAGGCGGGTTTTCCAAGTTACAACACGAGCGTCGTACAGATCATGGAAAAAAATTATCTAGATCTCTTGAACGATGCTTGGAAAGACTTAACTTGGCGGGAAAAATTATCCGCAACATGGTACTCATACAGAGCAAAACGCTCTATCACTCGGTACATAAAACCCACAGGAAGGGCAGATTTGAAAGGGTTATACAACATATCACCACAAGCATTCTTGGGCCGAGGCGCCCAGGTGGTCAAGGGCACTGCCTCAGGATTGAGCGAGCGATTTAATAATTATTTCAATACTAAGTGTGTGAATATTTCATCCTTTTTCATTCGTAGAATCTTTAGGCGTTTGCCAACTTTTGTCACTTTTGTTAACTCATTATTAGTTATTAGTATGTTAACCAGCGTAGTGGCAGTGTGTCAGGCAATAATTTTAGATCAGAGGAAGTATAGGAGAGAAATCGAGTTGATGCAGATAGAGAAGAATGAGATCGTCTGCATGGAGCTATATGCAAGTTTACAGCGCAAACTTGAACGCGATTTCACATGGGATGAGTACATTGAGTATTTGAAGTCAGTAAACCCTCAGATAGTTCAGTTTGCTCAAGCGCAGATGGAAGAATATGATGTGCGACACCAGCGTTCCACACCAGGTGTTAAAAATTTGGAACAAGTGGTAGCATTTATGGCTTTAGTCATCATGGTGTTCGATGCTGAAAGGAGTGATTGCGTGTTCAAAACTCTCAATAAATTTAAGGGTGTCCTTTCCTCACTGGACCATGAAGTTAGACATCAGTCCTTAGACGATGTGATCAAGAATTTTGATGATAGGAATGAGACTATTGATTTTGAATTGAGTGAGGACACAATTCGAACATCATCAGTGCTAGATACAAAGTTTAGTGATTGGTGGGACCGACAAATCCAGATGGGACATACACTTCCACATTACAGAACCGAGGGGCACTTCATGGAATTCACAAGAGCAACTGCTGTCCAAGTGGCTAATGATATCGCCCACAGCGAACACCTAGACTTTCTAGTAAGGGGAGCTGTCGGGTCTGGAAAGTCAACTGGGTTGCCTGTTCATCTTAGTGTAGCCGGATCTGTGCTTTTAATTGAACCAACGCGACCGCTAGCGGAGAACGTTTTCAAACAGCTATCTAGTGAACCATTCTTCAAGAAGCCAACACTGCGTATGCGTGGAAATAGTATATTTGGCTCTTCTCCAATCTCCGTCATGACTAGCGGATTTGCGCTACACTACTTCGCCAATAATCGCTCTCAATTAGCTCAGTTCAACTTTGTGATATTTGATGAGTGCCATGTTCTGGATCCTTCCGCAATGGCGTTCCGCAGTTTGCTGAGTGTTTATCATCAAGCATGCAAAGTATTAAAAGTGTCAGCTACTCCAGTGGGAAGAGAGGTTGAATTTACAACACAGCAACCAGTCAAGTTAATAGTGGAGGACACACTGTCTTTCCAATCATTTGTTGATGCACAAGGTTCTAAAACTAATGCTGATGTTGTTCAGTTTGGTTCAAATGTACTTGTGTACGTGTCGAGCTACAATGAAGTTGACACCTTGGCTAAGCTCCTAACAGACAAGAATATGATGGTCACAAAGGTTGATGGCAGAACAATGAAGCACGGTTGCCTAGAAATTGTCACAAAAGGAACCAGTGCGAGACCACATTTTGTTGTAGCAACCAACATAATTGAGAATGGAGTGACTTTGGACATAGACGTGGTTGTAGATTTTGGGTTGAAAGTCTCACCGTTCTTGGACATTGACAATAGGAGCATTGCTTACAATAAGGTGAGTGTTAGCTATGGTGAGAGAATTCAAAGGCTGGGTCGTGTTGGACGCTTCAAGAAAGGAGTAGCATTGCGCATTGGACACACTGAGAAGGGAATTATTGAAATTCCAAGCATGATCGCTACAGAGGCGGCTCTTGCTTGCTTTGCATATAACTTGCCAGTGATGACAGGAGGCGTCTCAACTAGTCTGATTGGCAATTGTACTGTGCGCCAAGTTAAAACAATGCAGCAATTTGAATTGAGTCCCTTCTTTATCCAGAATTTCGTTGCCCACGATGGATCAATGCATCCTGTCATACATGACATTCTTAAAAAGTATAAACTTCGAGATTGTATGACACCTTTGTGCGATCAGTCTATACCATACAGGGCATCGAGCACTTGGTTATCGGTTAGTGAATATGAGCGACTTGGAGTGGCCTTAGAAATTCCAAAGCAAGTCAAAATTGCATTCCATATCAAAGAGATCCCTCCTAAGCTCCACGAAATGCTTTGGGAAACGGTTGTCAAGTACAAAGACGTTTGCTTATTTCCAAGCATT-CGAGCATCGTCCATCAGCAAAATCGCATACACATTGCGTACAGACCTCTTCGCCATCCCAAGAACTCTAATATTGGTGGAGAGACTGCTTGAAGAGGAGCGAGTGAAGCAGAGCCAATTCAGAAGTCTCATCGACGAAGGATGCTCAAGCATGTTTTCAATTGTCAACTTGACAAATACTCTCAGAGCTAGATATGCAAAAGATTACACCGCAGAGAATATACAAAAACTTGAGAAAGTGAGAAGTCAATTGAAAGAATTCTCAAATTTGGATGGTTCTGCATGTGAGGAAAATTTAATAAAGAGGTATGAGTCTTTGCAGTTCGTTCATCACCAAGCTGCGACGTCACTTGCAAAGGATCTCAAGTTGAAGGGGACTTGGAAGAAGTCATTAGTGGCCAAAGACTTAATCATAGCAGGCGCTGTTGCAATTGGTGGAATAGGACTCATATATAGTTGGTTCACACAATCAGTTGAGACTGTGTCTCACCAAGGGAAAAATAAATCCAAAAGAATTCAAGCCTTGAAGTTTCGCCATGCTCGTGACAAAAGGGCTGGCTTTGAAATTGACAACAATGATGACACAATAGAGGAATTCTTTGGATCTGCATACAGGAAGAAGGGAAAAGGTAAAGGCACCACTGTTGGTATGGGCAAGTCAAGCAGGAGGTTTGTTAATATGTATGGATTTGACCCAACAGAATATTCATTCATCCAATTCGTTGATCCGCTCACTGGAGCTCAAATTGAAGAGAACGTCTATGCTGATATTAGAGACATCCAAGAGCGCTTTAGTGATGTCCGCAAGAAAATGGTAGAGGATGATGAAATCGAATTGCAAGCATTGGGCAGCAACACAACCATTCATGCTTACTTCAGGAAAGATTGGTCTGACAAGGCTCTAAAAATTGATTTGATGCCACACAACCCACTCAAAATCTGTGATAAATCGAATGGCATTGCTAAGTTTCCTGAAAGAGAACTTGAGTTGAGGCAAACTGGGCCAGCAATAGAGGTTGATGTGAAAGACATTCCAAAACAGGAAGTGGAGCATGAAGCCAAATCACTCATGAGAGGTTTAAGGGATTTCAATCCAATTGCTCAAACAGTTTGCAGAGTAAAAGTGTCTGTTGAATATGGAACGTCTGAAATGTATGGGTTCGGTTTTGGTGCGTATATTATAGTAAACCACCATCTATTCAAGAGTTTCAATGGATCCATGGAAGTGCGATCAATGCATGGAACATTCAGAGTGAAGAATTTGCATAGCTTGAGCGTTTTACCGATCAAAGGCAGAGACATTATCATCATAAAGATGCCAAAGGATTTCCCTGTTTTCCCACAAAAACTGCACTTCCGAGCTCCAGTGCAGAATGAGAGGATTTGTTTGGTTGGAACTAATTTTCAAGAAAAACATGCATCATCAATCATCACAGAAACGAGTACTACATACAATGTACCGGGCAGCACTTTTTGGAAGCATTGGATTGAAACAAATGATGGGCATTGTGGATTACCAGTAGTGAGTACAGCTGATGGATGTCTAGTTGGAATACACAGCTTGGCGAATAATGTGCAAACCACGAATTATTATTCAGCCTTCGATGAGGATTTTGAAAGTAAGTATCTCCGAACTAATGAGCATGATGAGTGGACCAAATCGTGGGTATATAACCCAGATACTGTGTTGTGGGGTCCATTGAAGCTCAAGGAGAGTGCCCCTAAAGGCCTGTTTAAGACAACAAAACTTGTACAGGATTTAAT------TGATCATGATGTTGTTGTAGAGCAAGCTAAACATTCTGCGTGGATGTATGAGGCTCTAACAGGGAATTTGCAAGCTGTGGCGTCAATGAAGAGTCAGCTGGTGACAAAGCACGTGGTCAAAGGGGAGTGTCGGCACTTTAAAGAGTTCTTAACTGTGGATTCGGAAGCAGAAGCT------TTCTTCAGGCCTTTGATGGATGCTTATGGGAAGAGCTTGTTAAATAGAGAAGCATATATAAAGGACATAATGAAATACTCAAAGCCTATTGATGTTGGAACAGTAGACTGTGAT--GCATTTGAAGAGGCTATCAATAGGGTTATCATTTATCTGCAA-GTGCATGGCTTCCAGAAATGCAATTACATCACCGATGAGCAGGAAATTTTCAAAGCTCTCAATATGAAAGCTGCTGTCGGAGCTATGTATGGAGGCAAGAAGAAAGACTACTTCGAGCATTTTACTGAGGCGGATAAAGAGGAAATTGTTATGCAAAGTTGCCTTCGATTGTACAAGGGCTCGCTTGGCATATGGAATGGATCATTGAAAGCAGAACTTCGGTGCAAAGAGAAGATACTTGCAAATAAGACAAGGACATTCACTGCTGCACCTTTAGATACTCTACTGGGTGGAAAGGTGTGCGTTGATGATTTTAATAATCAATTCTACTCGAAGAACATTGAATGCTGCTGGACTGTTGGAATGACTAAGTTTTATGGAGGTTGGGACAAATTACTTCGGCGTCTACCTGAAAATT---GGGTGTACTGCGATGCCGATGGTTCACAATTCGATAGTTCACTCACCCCATACCTAATTAATGCTGTTCTCATCATCAGAAGCACATACATGGAAGATTGGGACTTGGGGTTGCAAATGTTGCGCAATTTGTACACAGAAATAATTTACACGCCAATCTCAACTCCAGATGGAACAATTGTCAAGAAGTTTAGAGGTAATAATAGCGGTCAACCTTCTACCGTTGTGGATAATTCTCTCATGGTTGTCCTTGCTATGCATTACGCTCTCATTAAGGAGTGCGTTGAGTTTGAAGAAATCGACAGCACGTGTGTATTCTTTGTTAATGGTGATGACTTATTGATTGCTGTGAATCCGGAGAAAGAGAGCATTCTCGATAGAATGTCACAACATTTCTCAGATCTTGGTTTGAACTATGATTTTTCGTCGAGAACAAGAAGGAAGGAGGAATTGTGGTTCATGTCCCATAGAGGCCTGCTAATCGAGGGTATGTACGTGCCAAAGCTTGAAGAAGAGAGAATTGTATCCATTTTGCAGTGGGATAGAGCTGATCTGCCAGAGCACAGATTAGAAGCGATTTGTGCAGCAATGATAGAATCCTGGGGTTATTTTGAGTTAACGCACCAAATCAGGAGATTCTACTCATGGTTGTTGCAACAGCAACCTTTTTCAACGATAGCACAGGAAGGAAAAGCTCCATACATAGCGAGCATGGCATTGAAGAAGCTGTACATGGATAGGACAGTAGATGAGGAGGAACTGAAGGCTTTCACTGAAATGATG?GTTGCCTTGGATGATGAACTTGAGTGCGATACTTATGAAGTGCACCATCAAGGAAAT---------GACACAATCGATGCAGGAGGAAGCACTAAGAAGGATGCAAAACAAGAGCAAGGTAGCATTCAACCAAATCTCAACAAGGAAAAG---------------------------GAAAAGGACGTGAATGTTGGAACATCTGGAACTCATACTGTGCCACGAATTAAAGCTATCACGTCCAAAATGAGAATGCCCAAGAGTAAAGGTGCAACTGTACTAAATTTGGAACACTTACTCGAGTACGCTCCACAGCAAATTGACATCTCAAATACTCGAGCAACTCAATCACAGTTTGATACGTGGTATGGAGCGGTACAACTTGCATACGACATAGGAGAAACTGAAATGCCAACTGTGATGAATGGGCTTATGGTTTGGTGCATTGAAAATGGAACCTCGCCAAACATCAACGGAGTTTGGGTTATGATGGATGGAGATGAACAAGTCGAATACCCACTGAAACCAATCGTTGAGAATGCAAAACCAACACTTAGGCAAATCATGGCACATTTCTCAGATGTTGCAGAAGCGTATATAGAAATGCGCAACAAAAAGGAACCATATATGCCACGATATGGTTTAGTTCGTAATCTGCGCGATGGAAGTTTGGCTCGCTATGCTTTTGACTTTTATGAGGTCACATCACGAACACCAGTGAGGGCTAGGGAAGCGCACATTCAAATGAAGGCCGCAGCATTGAAATCAGCCCAACCTCGACTTTTCGGGTTGGACGGTGGCATCAGTACACAAGAGGAGAACACAGAGAGGCACACCACCGAGGATGTCTCTCCAAGTATGCATACTCTACTTGGAGTCAAGAACATGTGAT?GTAGTGTCTCTCCGGACGATATATAAGTATTTACA-TATGCAGTAAGTATTTTGGCTTTTCCTGTACTACTTTTATCATAATTAATAATCAGTTTGAATATTACTAATAGATAGAGGTGGCAGGGTGATTTCGTCATTGT-GGTGACTCTATCTTTTAATTCCGCATTATT-------------------------------------------------------------------------------------------------------------------------------------------------------------------------------------------------------------------------------------AAGTCTTAGATAAAAGTGCCGGGTTGTCGTTGTTGTGGATGATTCATCGATTAGGTGATGTTGCGATTCTGTCGTAGCAGTGACTATGTCTGGATCTATCTG-CTTGGGTGGTGTTGTGATTTCGTCATAACAGTGACTG???????????????????
	Hungarian    AAATTAAAACAACTCAATACAACATAAGAAAATCAACGCAAAAACACTCACAAAAGCTTTCAACTCTAATTCAAACAATTTGTTAAGTTTCAATTTCGATCTTCATCAAACAAACTCTTTCAATTTCAGTGTAAGCTATCGTAATTCAGTAAGTTATTTCAAACTCTCGTAAATTGCAGAAGATCATCCATGGCAACTTACACATCAACAATCCAGATTGGTTCCATTGAATGCAAACTTCCATACTCACCCGCTCCTTTTGGGCTAGTTGCGGGGAAACGAGAAGTTTCAACC-------------------------------------------------------------------------------------------------------------------------------------------------------------------------------------------------------------------------------------------------------------------------------------------------------------------------------------------------------------------------------------------------------------------------------------------------------------------------------------------------------------------------------------------------------------------------------------------------------------------------------------------------------------------------------------------------------------------ACCACTGACCCCTTCGCAAGTTTGGAGATGCAGCTTAGTGCGCGATTACGACGGCAAGAGTTTGCAACTATTCGAACATCCAAGAATGGTACTTGCATGTATCGATACAAGACTGATGCCCAGATTGCGCGCATTCAAAAGAAGCGCGAGGAGAGAGAAAGAGAGGAATATAATTTCCAAATGGCTGCGTCAAGTGTTGTGTCGAAGATCACTATTGCTGGTGGAGAGCCACCTTCAAAACTTGAATCACAAGTGCGGAAGGGTGTTATCCACACAACTCCAAGGATGCGCACAGCAAAAACATATCGCACGCCAAAATTGACAGAGGGACAAATGAACCACCTTATCAAGCAGGTGAAGCAAATTATGTCAACCAAAGGAGGGTCTGTTCAACTGATTAGCAAGAAAAGTACCCATGTTCACTATAAAGAAGTTTTGGGATCACATCGCGCAGTCGTTTGCACTGCA?CACATGAGAGGTTTACGAAAGAGAGTGGACTTTCGGTGTGATAAATGGACCGTTGTGCGCCTACAGCATCTCGCCAGGACGGACAAGTGGACTAACCAAGTTCGTGCTACTGATCTACGCAAGGGCGATAGTGGAGTTATATTGAGTAATACTAATCTCAAAGGACACTTTGGAAGAAGCTCGGAGGGCCTATTCATAGTGCGTGGGTCGCACGAAGGAAAAATCTATGATGCACGTTCCAAGGTTACTCAAGGGGTTATGGATTCAATGGTTCAGTTCTCAAGCGCTGAAAGCTTTTGGGAGGGATTGGACGGCAATTGGGCACAAATGAGATATCCTACAGATCATACATGTGTGGCAGGCATACCAGTTGAAGACTGTGGCAGAGTTGCAGCGATAATGACACACAGTATTTTACCGTGCTATAAGATAACCTGCCCTACCTGTGCCCAACAATATGCCAACTTGCCAGCCAGTGACTTACTTAAGATATTACACAAGCACGCAAGTGATGGTTTAAATCGATTGGGGGCAGACAAAGATCGCTTTGTGCATGTCAAAAAGTTCTTGACAATCTTAGAGCACTTAACTGAACCGGTTGATCTGAGTCTAGAAATTTTCAATGAAGTATTCAAGTCTATAGGGGAGAAGCAACAATCACCTTTCAAAAACCTGAATATTCTGAATAATTTCTTTTTGAAAGGAAAGGAAAATACAGCTCGTGAATGGCAGGTGGCTCAATTAAGCTTACTTGAATTGGCAAGATTCCAAAAGAACAGAACGGATAATATCAAGAAAGGAGACATCTCGTTCTTTAGGAATAAACTATCTGCCAAAGCAAATTGGAACTTGTATCTGTCATGTGATAACCAGCTGGATAAGAATGCAAACTTCCTGTGGGGACAGAGAGAATATCATGCTAAGCGATTTTTCTCGAACTATTTCGAGGAAATTGATCCAGCGAAGGGCTATTCAGCATACGAAAATCGTTTGCATCCGAATGGGACAAGAAAACTTGCAATTGGAAACCTAATTGTACCACTTGATCTGGCTGAGTTTAGGCGGAAGATGAAAGGTGATTATAAAAGACAGCCAGGGGTGAGTAAGAAGTGCACGAGCTCGAAGGATGGAAACTACGTGTATCCCTGTTGTTGCACTACACTTGATGATGGCTCAGCTGTTGAATCAACATTTTACCCGCCAACTAAGAAGCACCTCGTAATAGGTAATAGTGGCGATCAAAAGTATGTTGACTTACCAAAAGGGAATTCTGAGATGTTATATATTGCCAGGCAAGGTTTCTGTTACATTAACATTTTCCTCGCGATGTTGATTAACATTAGTGAGGAAGATGCAAAGGATTTCACTAAGAAGGTTCGTGACATGTGTGTGCCAAAGCTTGGAACCTGGCCAACCATGATGGATCTGGCTACAACTTGTGCTCAAATGAAAATATTCTACCCTGATGTTCATGATGCAGAACTGCCTAGAATACTAGTCGATCACGAAACGCAGACATGCCATGTGGTTGACTCGTTTGGCTCACAAACAACTGGGTATCATATTTTGAAAGCATCTAGCGTGTCCCAACTTATTTTGTTTGCTAATGATGAGTTGGAGTCTGACATTAAGCACTATAGAGTTGGTGGTATTCCTAATGCATGCCCTGAACTTGGGTCCACAAT-ATCACCTTTCAGAGAAGGAGGAGTTATAATGTCTGAGTCGGCAGCGCTGAAACTGCTTTTGAAGGGAATTTTTAGACCTAAGGTGATGAGACAGTTGCTGTTAGATGAGCCTTACCTGTTGATTCTATCAATATTATCCCCTGGCATACTGATGGCTATGTACAATAATGGGATTTTTGAACTTGCGGTAAAGTTGTGGATTAATGAGAAACAATCCATAGCTATGATAGCATCGCTACTATCAGCTTTAGCCCTACGAGTGTCAGCGGCAGAAACACTCGTCGCACAGAGGATTATAATTGATACTGCAGCTACAGATCTCCTTGATGCTACGTGCGATGGGTTCAACCTACATCTAACGTACCCCACTGCATTGATGGTGTTGCAAGTTGTTAAGAATAGAAATGAATGTGATGATACCCTATTCAAGGCGGGTTTTCCAAGTTACAACACGAGCGTCGTACAGATCATGGAAAAAAATTATCTAAATCTCTTGAACGATGCTTGGAAAGATTTAACTTGGCGGGAAAAATTATCCGCAACATGGTACTCATACAGAGCAAAACGCTCTATCACTCGGTACATAAAACCCACAGGAAGGGCAGATTTGAAAGGGTTATACAACATATCACCACAAGCATTCTTGGGCCGAGGTGCCCAGGTGGTCAAAGGCACTGCCTCAGGATTGAGCGAGCGATTTAATAATTATTTCAATACTAAGTGTGTGAATATTTCATCCTTTTTCATTCGTAGAATCTTTAGGCGTTTGCCAACTTTCGTCACTTTTGTTAACTCATTATTAGTTATTAGTATGTTAACCAGCGTAGTGGCAGTGTGTCAGGCAATAATTTTAGATCAGAGGAAGTATAGGAGAGAAATCGAGTTGATGCAGATAGAGAAGAATGAGATCGTCTGCATGGAGCTATATGCAAGTTTACAGCGCAAACTTGAACGCGATTTCACATGGGATGAGTACATTGAGTATTTGAAGTCAGTAAACCCTCAGATAGTTCAGTTTGCTCAAGCGCAGATGGAAGAATATGATGTGCGACACCAGCGTTCCACACCAGGTGTTAAAAATTTGGAACAAGTGGTAGCATTTATGGCTTTAGTCATCATGGTGTTCGATGCTGAAAGGAGTGATTGCGTGTTCAAAACTCTCAATAAATTTAAGGGTGTCCTTTCCTCACTGGACCATGAAGTTAGACATCAGTCCTTAGACGATGTGATCAAGAATTTTGATGAGAGGAATGAGACTATTGATTTTGAATTGAGTGAGGACACAATTCGAACATCATCAGTGCTAGATACAAAGTTTAGTGATTGGTGGGACCGACAAATCCAGATGGGACATACACTTCCACATTACAGAACCGAGGGGCACTTCATGGAATTCACAAGAGCAACTGCTGTCCAAGTGGCTAATGATATCGCCCATAGCGAACACCTAGACTTTCTAGTAAGGGGAGCTGTTGGGTCTGGAAAGTCAACTGGGTTGCCTGTTCATCTTAGTGTAGCTGGATCTGTGCTTTTAATTGAACCAACGCGACCACTAGCGGAGAACGTTTTCAAACAGCTATCTAGTGAACCATTCTTCAAGAAGCCAACACTGCGTATGCGTGGAAATAGTATATTTGGCTCTTCTCCAATCTCCGTCATGACTAGCGGATTTGCGCTACACTACTTCGCCAATAATCGCTCTCAATTAGCTCAGTTCAACTTTGTGATATTTGATGAGTGCCATGTTCTGGATCCTTCCGCAATGGCGTTCCGCAGTCTGCTGAGTGTTTATCATCAAGCATGCAAAGTATTAAAAGTGTCAGCTACTCCAGTGGGAAGAGAGGTTGAATTTACAACACAGCAACCAGTCAAGTTAATAGTGGAGGACACACTGTCTTTCCAATCATTTGTTGATGCACAAGGTTCTAAAACTAATGCTGATGTTGTTCAGTTTGGTTCAAACGTACTTGTGTACGTGTCGAGCTACAATGAAGTTGACACCTTGGCTAAGCTCCTAACAGACAAAAATATGATGGTCACAAAGGTTGATGGCAGAACAATGAAGCACGGTTGCCTAGAAATTGTCACAAGAGGAACCAGTGCGAGACCACATTTTGTTGTAGCAACCAACATAATTGAGAATGGAGTGACTTTGGACATAGACGTGGTTGTAGATTTTGGGTTGAAAGTCTCACCGTTCTTGGACATTGACAATAGGAGCATTGCTTACAATAAGGTGAGTGTTAGCTATGGTGAGAGAATTCAAAGGCTGGGTCGTGTTGGACGCTTCAAGAAAGGAGTAGCATTGCGCATTGGACACACTGAGAAGGGAATTATTGAAAATCCAAGCATGATCGCTACAGAGGCGGCTCTTGCTTGCTTTGCATATAACTTGCCAGTGATGACAGGAGGCGTTTCAACTAGTCTGATTGGCAATTGTACTGTGCGCCAAGTTAAAACAATGCAGCAATTTGAATTGAGTCCCTTCTTTATCCAGAATTTCGTTGCCCACGATGGATCAATGCATCCTGTCATACATGACATTCTTAAAAAGTATAAACTTCGAGATTGTATGACACCTTTGTGCGATCAGTCTATACCATACAGGGCATCGAGCACTTGGTTATCGGTTAGTGAATATGAGCGACTTGGAGTGGCCTTAGAAATTCCAAAGCAAGTCAAAATTGCATTCCATATCAAAGAGATCCCTCCTAAGCTCCACGAAATGCTTTGGGAAACGGTTGTCAAGTACAAAGACGTTTGCTTATTTCCAAGCATT-CGAGCATCGTCCATCAGCAAAATCGCATACACATTGCGTACAGACCTCTTCGCCATCCCAAGAACTCTAATATTGGTGGAGAGACTGCTTGAAGAGGAGCGAGTGAAGCAGAGCCAATTCAGAAGTCTCATCGACGAAGGATGCTCAAGCATGTTTTCAATTGTCAACTTGACAAACACTCTCAGAGCTAGATATGCAAAAGATTACACCGCAGAGAATATACAAAAACTTGAGAAAGTGAGAAGTCAATTGAAAGAATTCTCAAATTTGGATGGTTCTGCATGTGAGGAAAATTTAATAAAGAGGTATGAGTCTTTGCAGTTCGTTCATCACCAAGCTGCGACGTCACTTGCAAAGGATCTCAAGTTGAAGGGGACTTGGAAGAAGTCATTAGTGGCCAAAGACTTGATCATAGCAGGCGCTGTTGCAATTGGTGGAATAGGACTCATATATAGTTGGTTCACACAATCAGTTGAGACTGTGTCTCACCAAGGGAAAAATAAATCCAAAAGAATTCAAGCCTTAAAGTTTCGCCATGCTCGTGACAAAAGGGCTGGCTTTGAAATTGACAACAATGATGACACAATAGAGGAATTCTTTGGATCTGCATACAGGAAGAAGGGAAAAGGTAAAGGCACCACTGTTGGTATGGGCAAGTCAAGCAGGAGGTTTGTTAATATGTATGGATTTGACCCAACAGAATATTCATTCATCCAGTTCGTTGATCCGCTCACTGGAGCTCAAATTGAAGAGAACGTCTATGCTGATATTAGAGACATCCAAGAGCGCTTTAGTGATGTCCGCAAGAAAATGGTAGAGGATGATGAAATCGAATTGCAAGCATTGGGCAGCAACACAACCATTCATGCTTACTTCAGGAAAGATTGGTCTGACAAGGCTCTAAAAATTGATTTGATGCCACACAACCCACTCAAAATCTGTGATAAATCGAATGGCATTGCTAAGTTTCCTGAAAGAGAACTTGAGTTGAGGCAAACTGGGCCAGCAATAGAGGTTGATGTGAAAGACATTCCAAAACAGGAAGTGGAGCATGAAGCCAAATCACTCATGAGAGGTTTAAGGGATTTCAATCCAATTGCTCAAACAGTTTGCAGAGTAAAAGTGTCTGCTGAATATGGAACGTCTGAAATGTATGGGTTCGGTTTTGGTGCGTATATTATAGTAAACCACCATCTATTCAAGAGTTTCAATGGATCCATGGAAGTGCGATCAATGCATGGAACATTCAGAGTGAAGAATTTGCATAGCTTGAGCGTTTTACCGATCAAAGGCAGAGACATTATCATCATAAAGATGCCAAAGGATTTCCCTGTTTTCCCACAAAAACTGCACTTCCGAGCTCCAGTGCAGAATGAGAGGATTTGTTTGGTTGGAACTAATTTTCAAGAGAAACATGCATCATCAATCATCACAGAAACGAGTACTACATACAATGTACCGGGCAGCACTTTTTGGAAGCATTGGATTGAAACAAATGATGGGCATTGTGGATTACCAGTAGTGAGTACAGCTGATGGATGTCTAGTTGGAATACACAGCTTGGCGAATAATGTGCAAACCACGAATTATTATTCAGCCTTTGATGAGGATTTTGAAAGTAAGTATCTCCGAACTAATGAGCATAATGAGTGGACCAAATCGTGGGTATATAACCCAGATACTGTGTTGTGGGGTCCATTGAAGCTCAAGGAGAGTACCCCTAAAGGCCTGTTTAAGACAACAAAACTTGTACAGGATTTAAT------TGATCATGATGTTGTTGTAGAGCAAGCTAAACATTCTGCGTGGATGTATGAGGCTCTAACAGGGAATTTGCAAGCTGTGGCGACAATGAAGAGTCAGCTGGTGACAAAGCACGTGGTCAAAGGGGAGTGTCGGCACTTCAAAGAGTTCTTAACTGTGGATTCGGAAGCAGAAGCT------TTCTTCAGGCCTTTGATGGATGCTTATGGGAAGAGCTTGTTAAATAGAGAAGCATATATAAAGGACATAATGAAATACTCAAAGCCTATTGATGTTGGAATAGTAGACTGTGAT--GCTTTTGAAGAGGCTATCAATAGGGTTATCATTTATCTGCAA-GTGCATGGCTTCCAGAAATGCAATTACATCACCGATGAGCAGGAAATTTTCAAAGCTCTCAATATGAAAGCTGCTGTCGGAGCTATGTATGGAGGCAAGAAGAAAGACTACTTCGAGCATTTTACTGAGGCGGATAAAGAGGAAATTGTTATGCAAAGTTGCCCTCGATTGTACAAGGGCTCGCTTGGCATATGGAATGGATCATTGAAAGCAGAACTTCGGTGCAAAGAGAAGATACTTGCAAATAAGACAAGGACATTCACTGCTGCACCTTTAGATACTCTACTGGGTGGAAAGGTGTGCGTTGATGATTTTAATAATCAATTCTACTCGAAGAACATTGAATGCTGCTGGACTGTTGGAATGACTAAGTTTTACGGAGGTTGGGACAGATTGCTTCGGCGTCTACCTGAAAATT---GGGTGTACTGCGATGCCGATGGTTCACAATTCGATAGTTCACTCACCCCATACCTAATTAATGCTGTTCTCATCATCAGAAGCACATACATGGAAGATTGGGACTTGGGGTTGCAAATGTTGCGCAATTTGTACACAGAAATAATTTACACACCAATCTCAACTCCAGATGGAACAATTGTCAAGAAGTTTAGAGGTAATAATAGCGGTCAACCTTCTACCGTTGTGGATAATTCTCTCATGGTTGTCCTTGCTATGCATTACGCTCTCATTAAGGAGTGCGTTGAGTTTGAAGAAATCGACAGCACGTGTGTATTCTTTGTTAATGGTGATGACTTATTGATTGCTGTGAATCCGGAGAAAGAGAGCATTCTCGATAGAATGTCACAACATTTCTCAGATCTTGGTTTGAACTATGATTTTTCGTCGAGAACAAGAAGGAAGGAGGAATTGTGGTTCATGTCCCATAGAGGCCTGCTAATCGAGGGTATGTACGTGCCAAAGCTTGAAGAAGAGAGAATTGTATCCATTTTGCAATGGGATAGAGCTGATCTGCCAGAGCACAGATTAGAAGCGATCTGTGCAGCAATGATAGAATCCTGGGGTTATTCTGAGTTAACGCACCAAATCAGGAGATTCTACTCATGGTTGTTGCAACAGCAACCTTTTTCAACGATAGCACAGGAAGGAAAAGCTCCATACATAGCGAGCATGGCATTGAAGAAGCTGTACATGAACAGGACAGTAGATGAGGAGGAACTGAAGGCTTTCACTGAAATGATG?GTTGCCTTGGATGATGAACTTGAGTGCGATACTTATGAAGTGCACCATCAAGGAAAT---------GACACAATCGATGCAGGAGGAAGCACTAAGAAGGATGCAAAACAAGAGCAAGGTAGCATTCAACCAAATCTCAACAAGGAAAAG---------------------------GAAAAGGACGTGAATGTTGGAACATCTGGAACTCATACTGTGCCACGAATTAAAGCTATCACGTCCAAAATGAGAATGCCCAAGAGTAAAGGTGCAGCTGTACTAAATTTGAAACACTTGCTCGAGTATGCTCCACAGCAAATTGACATCTCAAATACTCGAGCAACTCAATCACAGTTTGATACGTGGTATGAAGCGGTACAACTTGCATACGACATAGGAGAAACTGAAATGCCAACTGTGATGAATGGGCTTATGGTTTGGTGCATTGAAAATGGAACCTCGCCAAACATCAACGGAGTTTGGGTTATGATGGATGGAGATGAACAAGTCGAATACCCACTGAAACCAATCGTTGAGAATGCAAAACCAACACTTAGGCAAATCATGGCACATTTCTCAGATGTTGCAGAAGCGTATATAGAAATGCGCAACAAAAAGGAACCATATATGCCACGATATGGTTTAGTTCGTAATCTGCGCGATGGAAGTTTGGCTCGCTATGCTTTTGACTTTTATGAGGTCACATCACGAACACCAGTGAGGGCTAGGGAAGCGCACATTCAAATGAAGGCCGCAGCATTGAAATCAGCCCAATCTCGACTTTTCGGGTTGGACGGTGGCATTAGTACACAAGAGGAGAACACAGAGAGGCACACCACCGAGGATGTCTCTCCAAGTATGCATACTCTACTTGGAGTCAAGAACATGTGAT?GTAGTGTCTCTCCGGACGATATATAAGTATTTACA-TATGCAGTAAGTATTTTGGCTTTTCCTGTACTACTTTTATCATAATTAATAATCAGTTTGAATATTACTAATAGATAGAGGTGGCAGGGTGATTTCGTCATTGT-GGTGACTCTATCTGTTAATTCCGCATTATT-------------------------------------------------------------------------------------------------------------------------------------------------------------------------------------------------------------------------------------AAGTCTTAGATAAAAGTGCCGGGTTGTCGTTGTTGTGGATGATTCATCGATTAGGTGATGTTGCGATTCTGTCGTAGCAGTGACTATGTCTGGATCTATCTG-CTTGGGTGGTGTTGTGATTTCGTCATAACAGTGACTGTAAACTTCAATCAGGAGA?
	Mb112        ?AATTAAAACAACTCAATACAACATAAGAAAATCAACGCAAAAACACTCACAAAAGCTTTCAACTCTAATTCAAACAATTTGTTAAGTTTCAATTTCGATCTTCATCAAACAAACTCTTTCAATTTCAGTGTAAGCTATCGTAATTCAGTAAGTTATTTCAAACTCTCGTAAATTGCAGAAGATCATCCATGGCAACTTACACATCAACAATCCAGTTTGGTTCCATTGAATGCAAACTTCCATACTCACCCGCTCCTTTTGGGCTAGTTGCGGGGAAACGAGAAGTTTCAACC-------------------------------------------------------------------------------------------------------------------------------------------------------------------------------------------------------------------------------------------------------------------------------------------------------------------------------------------------------------------------------------------------------------------------------------------------------------------------------------------------------------------------------------------------------------------------------------------------------------------------------------------------------------------------------------------------------------------ACCACTGACCCCTTCGCAAGTTTGGAGATGCAGCTTAGTGCGCGATTACGAAGGCAAGAGTTTGCAACTATTCGAACATCCAAGAATGGTACTTGCATGTATCGATACAAGACTGATGTCCAGATTGCGCGCATTCAAAAGAAGCGCGAGGAAAGAGAAAGAGAGGAATATAATTTCCAAATGGCTGCGTCAAGTGTTGTGTCGAAGATCACTATTGCTGGTGGAGAGCCACCTTCAAAACTTGAATCACAAGTGCGGAGGGGTGTCATCCACACAACTCCAAGGATGCGCACAGCAAAAACATATCACACGCCAAAGTTGACAGAGGGACAAATGAACCACCTTATCAAGCAGGTGAAGCAAATTATGTCAACCAAAGGAGGGTCTGTTCAACTGATTAGCAAGAAAAGTACCCATGTTCACTATAAAGAAGTTTTGGGATCACATCGCGCAGTTGTTTGCACTGCA?CATATGAGAGGTTTACGAAAGAGAGTGGACTTTCGGTGTGATAAATGGACCGTTGTGCGTCTACAGCATCTCGCCAGGACGGACAAGTGGACTAACCAAGTTCGTGCTACTGATCTACGCAAGGGCGATAGTGGAGTTATATTGAGTAATACTAATCTCAAAGGAAACTTTGGGAGAAGCTCGGAGGGCCTATTCATAGTGCGTGGGTCGCACGAAGGAAAAATCTATGATGCACGTTCCAAGGTTACCCAAGGGGTTATGGATTCAATGGTTCAGTTCTCAAGCGCTGAAAGCTTTTGGAAGGGATTGGACGGCAATTGGGCACAAATGAGATACCCTACAGATCATACATGTGTGGCAGGCTTACCAGTTGAAGACTGTGGCAGAGTTGCAGCGATAATGACACACAGTATTTTACCGTGCTATAAGATAACCTGCCCTACCTGTGCCCAACAATATGCCAACTTGCCAGCCAGTGACTTACTCAAGATATTACACAAGCACGCAAGTGATGGTTTAAATCGATTGGGGGCAGACAAAGATCGCTTTGTGCATGTCAAAAAGTTCTTGACAATCTTAGAGCACTTAACTGAACCGGTTGATCTGAGTCTAGAAATTTTCAATGAAGTATTCAAGTCTATAGGGGAGAAGCAACAATCACCTTTCAAAAACCTGAATATTCTGAATAATTTCTTTTTGAAAGGAAAGGAAAATACCGCTCGTGAATGGCAGGTGGCTCAATTAAGCTTACTTGAATTGGCAAGATTCCAAAAGAACAGAACGGATAATATCAAGAAAGGAGACATCTCGTTCTTTAGGAATAAACTATCTGCCAAAGCAAATTGGAACTTGTATCTTTCATGTGATAACCAGCTGGATAAGAATGCAAACTTCCTGTGGGGACAGAGGGAATATCATGCTAAGCGATTTTTCTCGAACTATTTCGAGGAAATTGATCCAGCGAAGGGCTATTCAGCATACGAAAATCGTTTGCATCCGAATGGGACAAGAAAACTTGCAATTGGAAACCTAATTGTACCACTTGATCTGGCTGAGTTTAGGCGGAAGATGAAAGGTGATTATAAAAGACAGCCAGGGGTGAGTAAGAAGTGCACGAGCTCGAAGGATGGAAACTACGTGTATCCCTGTTGTTGCACTACACTTGATGATGGCTCAGCTGTTGAATCAACATTTTACCCGCCAACTAAGAAGCACCTCGTAATAGGCAATAGTGGCGATCAAAAGTATGTTGACTTACCAAAAGGGAATTCTGAGATGTTATATATTGCCAGGCAAGGCTTCTGTTACATTAACATTTTCCTCGCGATGTTAATTAACAATAGTGAGGAAGATGCAAAGGATTTCACTAAGAAGGTTCGTGACATGTGTGTGCCAAAGCTTGGAACCTGGCCAACCATGATGGATCTGGCTACAACTTGTGCTCAAATGAAAATATTTTACCCTGATGTTCATGATGCAGAACTGCCTAGAATACTAGTCGATCACGAAACGCAGACATGCCATGTGGTTGACTCGTTTGGCTCACAAACAACTGGGTATCATATTTTGAAAGCATCTAGCGTGTCCCAACTTATTTTATTTGCCAATGATGAGTTGGAGTCTGACATTAAGCACTATAGAGTTGGTGGTGTTCCTAATGCATGCCCTGAACTTGGGTCCACAAT-ATCACCTTTCAGAGAAGGAGGAGTTATAATGTCTGAGTCGGCAGCGCTGAAACTGCTTTTGAAGGGAATTTTTAGACCTAAGGTGATGAGACAGTTGCTGTTAGATGAGCCTTACCTGTTGATTCTATCAATATTATCCCCTGGCATACTGATGGCTATGTACAATAATGGGATTTTTGAACTTGCGGTAAGGTTGTGGATTAATGAGAAACAATCCATAGCTATGATAGCATCGCTACTATCAGCTTTAGCCCTACGAGTGTCAGCGGCAGAAACACTTGTCGCACAGAGGATTATAATTGATACTGCAGCTACGGATCTCCTTGATGCTACGTGCGATGGGTTCAACCTACATCTAACGTACCCCACTGCGTTGATGGTGTTGCAAGTTGTTAAGAATAGAAATGAATGTGATGATACCCTATTCAAGGCGGGTTTTCCAAGTTACAACACGAGCGTCGTACAGATCATGGAAAAAAATTATCTAAATCTCTTGAACGATGCTTGGAAAGATTTAACTTGGCGGGAAAAATTATCCGCAACATGGTACTCATACAGAGCAAAACGCTCTATCACTCGGTACATAAAACCCACAGGAAGGGCAGATTTGAAAGGGTTATACAACATATCACCACAAGCATTCTTGGGCCGAGGCGCCCAGGTGGTCAAAGGCACTGCCTCAGGATTGAGCGAGCGATTTAATAATTATTTCAATACTAAGTGTGTAAATATTTCATCTTTTTTCATTCGTAGAATCTTTAGGCGTTTGCCAACTTTCGTCACTTTTGTTAACTCATTATTAGTTATTAGTATGTTAACCAGCGTAGTGGCAGTGTGTCAGGCAATAATTTTAGATCAGAGGAAGTATAGGAGAGAAATCGAGTTGATGCAGATAGAGAAGAATGAGATCGTCTGCATGGAGCTATATGCGAGTTTACAGCGCAAACTTGAACGCGATTTCACATGGGATGAGTACATTGAGTATTTGAAGTCAGTAAACCCTCAGATAGTTCAGTTTGCTCAAGCGCAGATGGAAGAATATGATGTGCGACACCAGCGTTCCACACCAGGTGTTAAAAATTTGGAACAAGTGGTAGCATTTATGGCTTTAGTCATCATGGTGTTCGATGCTGAAAGGAGTGATTGCGTGTTCAAAACTCTCAATAAATTTAAGGGTGTCCTTTCCTCACTGGACCATGAAGTTAGACATCAGTCCTTAGACGATGTGATCAAGAATTTTGATGAGAGGAATGAGATTATTGATTTTGAATTGAGTGAGGACACAATTCGAACATCATCAGTGCTAGATACAAAGTTTAGTGATTGGTGGGACCGACAAATCCAGATGGGACATACACTTCCACATTACAGAACCGAGGGGCACTTCATGGAATTCACAAGAGCAACTGCTGTCCAAGTGGCTAATGACATTGCCCATAGCGAACACCTAGACTTTCTAGTAAGGGGAGCTGTTGGGTCTGGAAAGTCAACTGGGTTGCCTGTTCATCTTAGTGTAGCCGGATCTGTGCTTTTAATTGAACCAACGCGACCACTAGCGGAGAACGTTTTCAAACAGCTATCTAGTGAACCATTCTTCAAGAAGCCAACACTGCGTATGCGTGGAAATAGTATATTTGGCTCTTCTCCAATCTCCGTCATGACTAGCGGATTTGCGCTACACTACTTCGCCAATAATCGCTCTCAATTAGCTCAGTTCAATTTTGTAATATTTGATGAGTGCCATGTTCTGGATCCTTCCGCAATGGCGTTCCGCAGTCTGCTGAGTGTTTATCATCAAGCATGCAAAGTATTAAAAGTGTCAGCTACTCCAGTGGGAAGAGAGGTTGAATTTACAACACAGCAACCAGTCAAGTTAATAGTGGAGGACACACTGTCTTTCCAATCATTTGTTGATGCACAAGGTTCTAAAACTAATGCTGATGTTGTTCAGTTTGGTTCAAACGTACTTGTGTACGTGTCGAGCTACAATGAAGTTGATACCTTGGCTAAGCTCCTAACAGACAAGAATATGATGGTCACAAAGGTTGATGGCAGAACAATGAAGCACGGTTGCCTAGAAATTGTCACAAAAGGAACCAGTGCGAGACCACATTTTGTTGTAGCAACCAACATAATTGAGAATGGAGTGACTTTGGACATAGACGTGGTTGTAGATTTCGGGTTGAAAGTCTCACCGTTCTTGGACATTGACAATAGGAGCATTGCTTACAATAAGGTGAGTGTTAGCTATGGTGAGAGAATTCAAAGGCTGGGTCGTGTTGGACGCTTCAAGAAAGGAGTAGCGTTGCGCATTGGACACACTGAGAAGGGAATTATTGAAATTCCAAGCATGATCGCTACAGAGGCGGCTCTTGCTTGCTTTGCATATAACTTGCCAGTGATGACAGGAGGCGTCTCAACTAGTCTGATTGGCAATTGTACTGTGCGCCAAGTTAAAACAATGCAGCAATTTGAATTGAGTCCCTTCTTTATCCAGAATTTCGTTGCCCATGATGGATCAATGCATCCTGTCATACATGACATTCTTAAAAAGTATAAACTTCGAGATTGTATGACACCTTTGTGCGATCAGTCTATACCATACAGGGCATCGAGCACTTGGTTATCGGTTGGTGAATATGAGCGACTTGGAGTGGCCTTAGAAATTCCAAAGCAAGTCAAAATTGCATTCCATATCAAAGAGATCCCTCCTAAGCTCCACGAAATGCTTTGGGAAACGGTTGTCAAGTACAAAGACGTTTGCTTATTTCCAAGCATT-CGAGCATCGTCCATCAGCAAAATCGCATACACATTGCGTACAGACCTCTTCGCCATCCCAAGAACTCTAATATTGGTGGAGAGACTGCTTGAAGAGGAGCGAGTGAAGCAGAGCCAATTCAGAAGTCTCATCGACGAAGGATGCTCAAGCATGTTTTCAATTGTCAACTTGACAAACACTCTCAGAGCTAGATATGCAAAAGATTACACCGCAGAGAACATACAAAAACTTGAGAAAGTGAGAAGTCAATTGAAAGAATTCTCAAATTTGGATGGTTCTGCATGTGAGGAAAATTTAATAAAGAGGTATGAGTCTTTGCAGTTCGTTCATCACCAAGCTGCGACGTCACTTGCAAAGGATCTCAAGTTGAAGGGGACTTGGAAGAAGTCATTAGTGGCCAAAGACTTGATCATAGCAGGCGCTGTTGCAATTGGTGGAATAGGACTCATATATAGTTGGTTCACACAATCAGTTGAGACTGTGTCTCACCAAGGGAAAAATAAATCCAAAAGAATTCAAGCCTTGAAGTTTCGCCATGCTCGTGACAAAAGGGCTGGCTTTGAAATTGACAACAATGATGACACAATAGAGGAATTCTTTGGATCTGCATACAGGAAAAAGGGAAAAGGTAAAGGTACCACAGTTGGTATGGGCAAGTCAAGCAGGAGATTCATCAACATGTATGGGTTTGATCCAACAGAGTACTCATTCATCCAATTCGTTGATCCACTCACTGGGGCGCAAATAGAAGAGAATGTCTATGCTGACATTAGAGATATTCAAGAGAGATTTAGTGAAGTGCGAAAGAAAATGGTTGAGAATGATGACATTGAAATGCAAGCCTTGGGCAGTAACACGACCATACATGCATACTTCAGGAAAGATTGGTCTGACAAAGCTTTGAAGATTGATTTAATGCCACATAATCCACTCAAAGTTTGTGACAAGACAAATGGCATTGCCAAATTTCCTGAGAGAGAGCTCGAACTAAGGCAGACTGGGCCAGCTGTAGAAGTCGACGTGAAGGACATACCAGCACAGGAGGTGGAGCATGAAGCTAAATCACTCATGAGAGGCTTGAGAGACTTCAACCCAATTGCCCAAACAGTTTGTAGGTTGAAAGTATCTGTTGAATATGGGACATCAGAGATGTACGGTTTTGGATTTGGAGCATACATAATAGCGAACCACCATTTATTCAGGAGTTACAATGGTTCCATGGAGGTGCGATCCATGCACGGTACATTCAGGGTGAAGAATCTACACAGTTTGAGCGTTCTGCCAATTAAAGGTAGGGATATCATCCTCATCAAAATGCCGAAAGATTTCCCTGTCTTTCCACAGAAATTGCATTTCCGAGCTCCTACACAGAATGAAAGAGTTTGTTTAGTTGGAACCAACTTCCAGGAGAAGTATGCATCGTCGATCATCACAGAAACAAGCACCACTTACAATATACCAGGCAGCACATTCTGGAAGCATTGGATTGAAACAGATAATGGACATTGTGGACTACCAGTGGTGAGCACCACCGATGGATGTCTAGTCGGAATTCACAGTTTGGCAAACAACAAACACACCACGAACTACTACTCAGCCTTCGATGAAGATTTTGAAAGCAAGTATCTCCGAACTAATGAGCACAATGAATGGGTCAAGTCTTGGATTTATAATCCAGACACAGTGTTGTGGGGCCCGTTGAAACTTAAAGACAGCACTCCCAAAGGATTATTCAAAACAACAAAGCTTGTGCAAGATCTAAT------CGATCATGATGTAGTGGTGGAGCAAGCTAAGCACTCTGCGTGGATGTTTGAAGCCTTGACAGGAAATTTGCAAGCTGTCGCAACAATGAAGAGCCAATTAGTAACCAAGCATGTAGTTAAAGGAGAGTGTCGACACTTCAAAGAATTCCTGACTGTGGATGCAGAAGCAGAGGCA------TTCTTCAGGCCTTTGATGGATGCGTATGGGAAAAGCTTGCTGAATAGAGATGCATACATCAAGGACATAATGAAGTATTCAAAACCTATAGATGTTGGTATCGTGGACTGTGAT--GCATTTGAGGAAGCCATCAATAGGGTTATCATCTACCTGCAA-GTGCACGGCTTCAAGAAGTGCGCATACGTCACTGACGAGCAAGAAATTTTCAAAGCGCTCAACATGAAAGCTGCAGTCGGAGCCATGTATGGTGGCAAAAAGAAAGACTATTTTGAGCATTTCACTGATGCAGATAAGGAAGAAATAGTCATGCAAAGCTGTCTGCGATTGTATAAAGGCTTGCTTGGCATTTGGAATGGATCATTGAAGGCAGAGCTCCGGTGTAAGGAAAAGATACTTGCAAATAAGACGAGGACATTCACTGCTGCACCTTTAGACACTTTGCTGGGTGGTAAAGTGTGTGTTGATGACTTCAATAATCAATTTTATTCAAAGAATATTGAATGCTGTTGGACAGTTGGGATGACTAAGTTTTATGGTGGTTGGGATAAACTGCTGCGGCGTTTACCTGAGAATT---GGGTATACTGTGATGCCGATGGCTCACAGTTTGATAGTTCACTAACTCCATACTTAATCAATGCTGTTCTCACCATCAGAAGCACATACATGGAAGATTGGGATGTGGGGTTGCAAATGTTGCGCAATTTGTACACTGAGATTGTTTACACACCTATTTCAACTCCAGATGGAACAATTGTTAAGAAGTTTAGAGGAAATAACAGTGGTCAGCCTTCTACTGTTGTGGACAACTCTCTTATGGTCGTCCTTGCCATGCACTATGCTCTCATCAAAGAATGCATTGAGTTTGAAGAGATTGACAGCACGTGCGTATTCTTTGTCAATGGTGATGATTTGCTGATTGCTGTGAATCCGGATAAAGAGGGCATTCTTGACAGATTGTCACAACACTTCTCAGATCTTGGTTTGAATTATGATTTCTCGTCAAGAACAAGAAATAAGGAGGAGTTGTGGTTTATGTCTCATAGAGGCCTACTGATTGAGGGCATGTACGTGCCGAAACTTGAAGAAGAAAGGATTGTGTCCATTCTCCAATGGGACAGAGCAGACTTGGCTGAACATAGGCTTGAGGCGATTTGCGCAGCTATGATAGAGTCCTGGGGTTATTCTGAACTAACACACCAAATCAGGAGATTCTACTCATGGTTATTGCAACAGCAACCCTTTGCAACAATAGCGCAGGAAGGGAAGGCTCCTTATATAGCAAGCATGGCATTAAGGAAATTGTATATGGATAGGGCTGTGGATGAGGAAGAGCTGAGAGCCTTCACTGAAATGATG?GTCGCATTAGACGATGAGTTTGAATTTGACTCTTATGAAGTATACCATCAAGCAAAT---------GACACAATCGATGCAGGAGGAAGCAGCAAGAAAGATGCAAGACCAGAGCAAGGCAGCATCCAGTCAAACCCGAACAAAGGAAAA---------------------------GATAAGGATGTGAATGCTGGTACATCTGGGACACACACTGTGCCGAGAATCAAGGCTATCACGTCCAAAATGAGAATGCCCAAAAGCAAGGGAGCAACCGTGCTAAACTTAGAACACTTGCTTGAGTATGCTCCACAACAAATTGATATTTCAAATACTCGGGCAACTCAATCACAGTTTGATACGTGGTATGAGGCAGTGCGGATGGCATATGACATAGGAGAAACTGAGATGCCAACTGTGATGAATGGGCTTATGGTTTGGTGCATTGAAAATGGAACCTCGCCAAATGTCAACGGAGTTTGGGTTATGATGGATGGGGATGAACAAGTCGAGTACCCGTTGAAACCAATCGTTGAGAATGCAAAACCAACCCTTAGGCAAATCATGGCACATTTCTCAGATGTTGCAGAAGCGTATATAGAAATGCGCAACAAAAAGGAACCATATATGCCACGATATGGTTTAATTCGAAATCTGCGGGATGTGGGTTTAGCGCGTTATGCCTTCGACTTTTATGAGGTCACATCACGAACACCAGTGAGGGCTAGGGAAGCGCACATTCAAATGAAGGCCGCAGCATTGAAATCAGCCCAACCTCGACTTTTCGGGTTGGACGGTGGCATCAGTACACAAGAGGAGAACACAGAGAGGCACACCACCGAGGATGTCTCTCCAAGTATGCATACTCTACTTGGAGTTAAGAACATGTGAT?GTAGTGTCTCTCCGGACGATATATAAGTATTTACA-TATGCAGTAAGTATTTTGGCTTTTCCTGTACTACTTTTATCATAATTAATAATCAGTTTGAATATTACTAATAGATAGAGGTGGCAGGGTGATTTCGTCATTGT-GGTGACTCTATCTTTTAATTCCGCATTATT-------------------------------------------------------------------------------------------------------------------------------------------------------------------------------------------------------------------------------------AAGTCTTAGATAAAAGTGCCGGGTTGTCGTTGTTGTGGATGATTCATCGATTAGGTGATGTTACGATTCTGTCGTAGCAGTGACTATGTCTGGATCCATCTG-CTTGGGTGGTGTTGTGATTTCGTCATAACAGTGACTGTAAACTTCAATCAGGAGA?
[truncated: 235,481 more chars]
